# Supplementary material for: Naturally enhanced neutralizing breadth against SARS-CoV-2 one year after infection
Source: Nature. 2021 Jun 14;595(7867):426–31. doi: 10.1038/s41586-021-03696-9 (PMC8277577; doi:10.1038/s41586-021-03696-9)
Supplement: Supplementary file 5 — Sequences, half maximal effective concentrations (EC50s) and inhibitory concentrations (IC50s) of the cloned monoclonal antibodies. [file 41586_2021_3696_MOESM5_ESM.xlsx]

## Sheet: Sheet1
	Table 4. Sequences, RBD binding and neutralization of cloned recombinant antibodies
																			EC50 [ng/ml]		Neutralization [ng/ml]
	Participant ID		Antibody ID		Timepoint		Clone		IGH V gene	IGH J gene	IGH VDJ (nt)	IGH VDJ (aa)		IGL V gene	IGL J gene	IGL VJ (nt)	IGL VJ (aa)		RBD		IC50	IC90
																			RBD
	COV21		C837		12m		Singlet		IGHV3-11	IGHJ6	﻿CAGGTGCAGCTGGTGGAGTCTGGGGGAGGCTTGGTCAAGCCTGGGGGGTCCCTGACTCTCTCCTGTGCAGGCGCTGGATTCAATTTCAGTGACTATTGCCTGACCTGGATCCGTCAGGCTCCAGGGAAGGGGCTGGAGTGCCTTTCATACATTTGTAGTGGTGCTGATGAAACATATATCGCTGACTCTGTGAAGGGCCGATTCACCATCTCCAGGGACAACGCCAAGAATTCACTGTATTTGAAAATGAGCAGCCTGAGAGCCGAAGACACGGCCGTCTATTACTGTGCGAGAAGGGGGGACGGTAACACCCCGATCTACCACTACTACTACATGGACGTCTGGGGCAAAGGGACCACGGTCACCGTCTCCTCA	﻿QVQLVESGGGVVQPGRSLRLSCEASRFTFRSHAMHWVRQAPGKGLEWVAVIWYDGKNEYYADSVKGRFTISRDNSKKMVYLQMNNLRAEDTAVYYCAREGIAAPDSKADAFDIWGQGTMVTVSS		IGLV1-44	IGLJ2	﻿CAGTCTGTGCTGACTCAGCCACCGTCAGCGTCTGGGACCCCCGGACAGAGGGTCACCATCCCTTGTTCTGGAGGCAGCTCCAACATCGGCAGTAACACCGTACACTGGTATCAGCAGGTCCCAGGAACGGCCCCCAAACTCCTCGTCTATGGTAATAATCGGCGGCCCGCAGGGGTCCCTGACCGATTCTCTGGCTCCAGGTCTGGCGCCTCAGCCTCCCTGGCCATCACTGGGCTCCAGTCTGAGGATGAGGCTGTGTACTACTGTGCAACATGGGATGACAGCCCGAATGGTCCGGTTTTCGGCGGAGGGACCAAGCTGACCGTCCTAG	﻿QSVLTQPPSASGTPGQRVTIPCSGGSSNIGSNTVHWYQQVPGTAPKLLVYGNNRRPAGVPDRFSGSRSGASASLAITGLQSEDEAVYYCATWDDSPNGPVFGGGTKLTVL		2.029		8.6126	48.7479
			C838		12m		clone		IGHV3-9	IGHJ4	﻿GAAGTGCAGCTGGTGGAGTCTGGGGGAGGCTTGGTACAGCCTGGCAAGTCCCTGAGACTCTCCTGTACAGCCTCTGGATTCACCTTTGAAGATTATGCCATGCACTGGGTCCGGCAAGCTCCAGGGAAGGGCCTGGAGTGGGTCTCAGGTATTAATTGGAAGAGTGGTAGTAGAGGCTACGCAGACTCTGCGAAGGGCCGCTTCACCATCTCCGGAAACACCGCCAAGAACACCCTCCATCTGCAAATGAACAGTCTGCGAGCGGAGGACACGGCCTTCTATTACTGTGCAAAAGCGGGCGTTAGGAATATAGCAGCGGCTGGTCCCGACCTCAACTTTGACTTCTGGGGCCAGGGAACCCTGGTCACCGTCTCCTCAG	﻿EVQLVESGGGLVQPGKSLRLSCTASGFTFEDYAMHWVRQAPGKGLEWVSGINWKSGSRGYADSAKGRFTISGNTAKNTLHLQMNSLRAEDTAFYYCAKAGVRNIAAAGPDLNFDFWGQGTLVTVSS		IGKV3-11	IGKJ5	﻿GAAATTGTGTTGACACAGTCTCCAGCCACCCTGTCTTTGTCTCCAGGGGAAAGAGCCACCCTCTCCTGCAGGGCCAGTCAGAGTGTTGGCACCTACTTAGCCTGGTACCAACACAAACTTGGCCAGGCTCCCAGGCTCCTCATCTATGATGCAACCAAGAGGGCCACTGGCATCCCAGCCAGGTTCAGTGGCAGTGGGTCTGGGACAGACTTCACTCTCACCATCAGCAGCCTAGAGCCTGAAGATTTTGCTATTTATTACTGTCAGCAGCGTATCACCTTCGGCCAAGGGACACGACTGGAGATTAAAC	﻿EIVLTQSPATLSLSPGERATLSCRASQSVGTYLAWYQHKLGQAPRLLIYDATKRATGIPARFSGSGSGTDFTLTISSLEPEDFAIYYCQQRITFGQGTRLEIK		3.03		2.89695	25.5902
			C839		12m		clone		IGHV4-4	IGHJ4	﻿CAGGTGCAGCTGCAGGAGTCGGGCCCAGGACTGGTGAAGCCTTTAGATACCCTGTCCCTCACATGCACTGTCTCTGGTGCCTCCATCAGCAGTTACTATTGGAGCTGGATCCGGCAGCCCGCCGGGAAGGGACTGGAGTGGATTGGACTTATCTATAGTAGTGGAAGCACTACTTACAACCCCTCCCTCAAGAGTCGAGTCACCATGTCAGTTGACACGTCCAAGAAGCAGTTCTCCCTGAACCTCAGTTCGATGACCGCCGCGGACACGGCCGTGTATTACTGTGCGAGAGGGTCGGCCTTAAACTGGAAGTCCATTGGATACTTTGACTCCTGGGGCCAGGGAACCCTGGTCACCGTCTC	﻿QVQLQESGPGLVKPLDTLSLTCTVSGASISSYYWSWIRQPAGKGLEWIGLIYSSGSTTYNPSLKSRVTMSVDTSKKQFSLNLSSMTAADTAVYYCARGSALNWKSIGYFDSWGQGTLVTV		IGKV1-33	IGKJ4	﻿GACATCCAGATGACCCAGTCTCCATCCTCCCTGTCTGCATCTATAAGAGACAGAGTCACCATCACTTGCCAGGCGAGTCAGGACATAAGTAATTATTTAAATTGGTATCAGCAGAAAGCAGGGGAAGCCCCTAAACTTCTGATCTACGATGCATCCAGTTTGGAAACAGGGGTCCCATCAAGGTTCAGTGGAAGTGGATCTGGGACAGAATTTACTCTCACCATCAGCAGCCTGCAGCCTGAAGACATTGCCACATATTACTGTCAACAGTATGATCATGTCCCGCTCACTTTCGGCGGAGGGACCAAGGTGGAGATCAAAC	﻿DIQMTQSPSSLSASIRDRVTITCQASQDISNYLNWYQQKAGEAPKLLIYDASSLETGVPSRFSGSGSGTEFTLTISSLQPEDIATYYCQQYDHVPLTFGGGTKVEIK		4.38		>1000	>1000
			C840		12m		Singlet		IGHV3-30	IGHJ4	﻿CAGGTGCAGCTGGTGGAGTCTGGGGGAGGCGTGGTCCAGCCTGGGAGGTCCCTGAGACTCTCCTGTGAAGCCTCTGGATTCACCTTCACTGCCTATGCTATGCACTGGCTCCGCCAGGCTCCAGGCAAGGGGCTGGAGTGGGTGGCAGTTATCTTAAATGATGGAAGCAATAAATTGTACGCAGACTCCGTGAAGGGCCGATTCACCGTCTCCCGAGATAATTCCAAGAACATGCTGTATCTGCAAGTGAACAGCCTGAGAGTTGACGACACGGCTGTGTATTATTGTGCGAGAGACGGGAGCGTGGATACACTTATGGTTACGTGGTTTGATTATTGGGGCCAGGGAACCCTGGTCACCGTCTCCTCAG	﻿QVQLVESGGGVVQPGRSLRLSCEASGFTFTAYAMHWLRQAPGKGLEWVAVILNDGSNKLYADSVKGRFTVSRDNSKNMLYLQVNSLRVDDTAVYYCARDGSVDTLMVTWFDYWGQGTLVTVSS		IGKV1-39	IGKJ1	﻿GACATCCAGATGACCCAGTCTCCATCCTCCCTGTCTGCATCTGTAGGAGACAGAGTCACCATCACTTGCCGGGCAAGTCAGAGCGTTAACAACTATTTAAATTGGTATCAGCAGAAACCAGGGCAAGCCCCTAAGCTCCTGATCTATGCTGCATCCAGTTTGCAAAGTGGGGTCCCATTAAGGTTCAGTGGCAGTGGATCTGGGACAGATTTCGCTCTCACCATCACCAGTCTCCATACTGAGGATTTTGCCACTTACTACTGTCAACAGAGTTACAATACCCCGCCGTGGACGTTCGGCCCAGGGACCAAGGTGGAAATCAAAC	﻿DIQMTQSPSSLSASVGDRVTITCRASQSVNNYLNWYQQKPGQAPKLLIYAASSLQSGVPLRFSGSGSGTDFALTITSLHTEDFATYYCQQSYNTPPWTFGPGTKVEIK		1.36		>1000	>1000
			C841		12m		Singlet		IGHV3-48	IGHJ5	﻿GAGGTGCAGCTGGTGGAGTCTGGGGGAGGCTTGGTACAGCCGGGGGGGTCCCTGAGGCTCTCCTGTGCTGCCTCTGGATTCACCTTCAGTATATTTAGTATGAACTGGGTCCGCCAGGCTCCAGGGAAGGGGCTGGAGTGGATCTCATACATTAGTAGTAGTAGTGGTTCCAGACACTACGCAGACTCTGTGAAGGGCCGATTCACCATCTCCAGAGACAATGCCAAGAATTCACTGTATCTGCAAATGAACAACCTGAGAGACGAGGACACGGCTATGTATTACTGTGCGAGAGAGGCCCACGACGGGGCTCTCACCGGCTACGGTGACTACCTGAACTGGTTCGACCCCTGGGGCCAGGGAGTCCTGGTCACCGTCTCCTCAG	﻿EVQLVESGGGLVQPGGSLRLSCAASGFTFSIFSMNWVRQAPGKGLEWISYISSSSGSRHYADSVKGRFTISRDNAKNSLYLQMNNLRDEDTAMYYCAREAHDGALTGYGDYLNWFDPWGQGVLVTVSS		IGLV3-21	IGLJ3	﻿TCCTATGAGCTGACTCAGCCACCCTCCGTGTCAGTGGCCCCAGGAAAGACGGCCAGGATTCCCTGTGGGGGAGACAGCGTTGGGAGTAAGAGTGTACACTGGTATCAACAGAAGTCTGGCCAGGCCCCTGTCTTAGTCATTCATTCTGATAGTGACCGGCCCTCAGGGATCCCTGAGCGATTCTCTGGCTCCAACTCTGGGAACACGGCCACCCTGACCATCACCGGGGTCGCAGCCGGGGATGAGGCCGACTATTATTGTCATGTGTGGGATACTATTGGTGATCGTTTTTATTGGGTGTTTGGCGGAGGGACCAAGCTGACCGTCCTAG	﻿SYELTQPPSVSVAPGKTARIPCGGDSVGSKSVHWYQQKSGQAPVLVIHSDSDRPSGIPERFSGSNSGNTATLTITGVAAGDEADYYCHVWDTIGDRFYWVFGGGTKLTVL		3.15		>1000	>1000
			C842		12m		Singlet		IGHV3-30	IGHJ4	﻿CAGGTGCAGCTGGTGGAGTCTGGGGGAGGCGTGGTCCAGCCTGGGAGGTCCCTGAGGCTCTCCTGTGCAGCCTCTGGATTCACCTTCAGTACCTATGCTATCCACTGGGTCCGCCAGGCTCCAGGCAAGGGGCTGGAGTGGGTGGCAGCTATATCATATGATGGAAGCAATAAATACTACTCAGACTCCGTGAAGGGCCGACTCTTCATCTCCAGAGACAATTCCAACAACACAGTGTATCTGCAAATGAACAATCTGAGAGCTGAGGACACGGCTATTTATTACTGTGCGAGAGATGGGACTATTGTTACTTTGGTTCGAGGAGTTATGGGACCACCCTTTGACTACTGGGGCCAGGGAACCCTGGTCACCGTCTCCTCAG	﻿QVQLVESGGGVVQPGRSLRLSCAASGFTFSTYAIHWVRQAPGKGLEWVAAISYDGSNKYYSDSVKGRLFISRDNSNNTVYLQMNNLRAEDTAIYYCARDGTIVTLVRGVMGPPFDYWGQGTLVTVSS		IGKV1-33	IGKJ3	﻿GACATCCAGATGACCCAGTCTCCATCCTCCCTGTCTGCATCTGTAGGAGACAGAGTCACCATCACTTGCCAGGCGAGTCAGCACATTAGCAATTACTTAAATTGGTATCAGCAGAAACCTGGGAAAGCCCCTAAGCTCCTGATCTACGATGCATCCAATTTGGAAACAGGGGTCCCATCAAGGTTCAGTGGAACTGGATCTGGGACAGATTTTGCTTTCACCATCAGCAGCCTGCAGCCTGAAGATATTGCAACATATTACTGTCAACAATATGATAATCTCCCTCCGGTTTTCGGCCCTGGGACCAAAGTGGATATCAAAC	﻿DIQMTQSPSSLSASVGDRVTITCQASQHISNYLNWYQQKPGKAPKLLIYDASNLETGVPSRFSGTGSGTDFAFTISSLQPEDIATYYCQQYDNLPPVFGPGTKVDIK		3.01		8.43594	45.0809
			C843		12m		Singlet		IGHV3-30	IGHJ4	﻿CAGGTGCAGCTGGTGGAGTCTGGGGGAGGCGTGGTCCAACCTGGGAGGTCCCTGAGACTCTCCTGTGCAGCCTCTGGATTCACCTTCAGTCGCTATGCCATGCACTGGGTCCGCCAGGCTCCAGGCAAGGGGCTGGAGTGGGTGGCAGTTATATCATATGATGGAAGTAATAAATACTATGCAACCTCCCTGAAGGGCCGATGCACCATCTCCAGAGACAATTCCAAGAACACGCTGTATCTGCAAATGAACAGCCTGAGAGCTGAGGACACGGCTGTGTATTTCTGTGCGAAGCAAATCGGGGAATATTGTAGTGGTGGTAACTGCTACCAGGGGAGTCTTGACTACTGGGGCCAGGGAACCCTGGTCACCGTCTCCTCAG	﻿QVQLVESGGGVVQPGRSLRLSCAASGFTFSRYAMHWVRQAPGKGLEWVAVISYDGSNKYYATSLKGRCTISRDNSKNTLYLQMNSLRAEDTAVYFCAKQIGEYCSGGNCYQGSLDYWGQGTLVTVSS		IGKV1-33	IGKJ3	﻿GACATCCAGATGACCCAGTCTCCATCCTCCCTGTCTGCATCTGTCGGAGACAGAGTCACCATCACTTGCCAGGCGAGTCAGGACATTAGCAACTATTTAAATTGGTATCAGCAGAAACCAGGGAAAGCCCCTAAACTCCTAATCTACGACGCATCCGATTTGGAAACAGGGGTCCCATCAACGTTCAGTGGAAGTGGATCTGGGACAGATTTTACTCTCACCATCAGCAGCCTGCAGCCTGAAGATTTTGCAACATATTACTGTCAACAGTATGATATTGTCCCATTCACTTTCGGCCCTGGGACCAAAGTGGATATCAAAC	﻿DIQMTQSPSSLSASVGDRVTITCQASQDISNYLNWYQQKPGKAPKLLIYDASDLETGVPSTFSGSGSGTDFTLTISSLQPEDFATYYCQQYDIVPFTFGPGTKVDIK		1.34		>1000	>1000
			C844		12m		Singlet		IGHV3-15	IGHJ3	﻿GAGGTGCAGCTGGTGGAGTCTGGGGGAGGCTTGGTAAAGCCTGGGGGGTCCCTTAGACTCTCCTGTGTAGCCACTGGATTCAGTTTCAGTGACGCCTGGATGAACTGGGTCCGCCAGGCTCCAGGGAAGGGGCTGGAGTGGGTTGGCCGTATTAGAAGTGAGATTGCTGATGGGACAACAGACTATGCTGCACCCGTAAAAGGCAGATTCACGATCTCTAGAGATGATGCAAGAAACACACTGTATCTGCAAATGAACAGCCTGGAAATAGAGGACACCGCCGTATATTACTGCACCACAGGTGTTGTGGTGGTGGTTTCGTCTAGTCCCGATGATGCTTTTGATGTCTGGGGCCAAGGTACAATGGTCACCGTCTCTTCAG	﻿EVQLVESGGGLVKPGGSLRLSCVATGFSFSDAWMNWVRQAPGKGLEWVGRIRSEIADGTTDYAAPVKGRFTISRDDARNTLYLQMNSLEIEDTAVYYCTTGVVVVVSSSPDDAFDVWGQGTMVTVSS		IGKV1-39	IGKJ1	﻿GACATCCAGATGACCCAGTCTCCATCCTCCCTGTCTGCATCTGTAGGAGACAGAGTCACCATCACTTGCCGGGCAAGTCAGAGTATTGGCCACTATTTAAATTGGTATCAGCAGAAACCAGGGAAAGCCCCTAAACTCCTGATATATGCCGCATCCAGTTTGCAAAGTGGAGTCCCATCAAGGTTCAGTGGCAGTGGATCTGGGGCTGGTTTCACTCTCACCGTCAACGGTCTGCAACCTGAAGATCTTGCAACTTATTACTGTCAACAGTATTACACTACCCCTCCGACGTTCGGCCAAGGGACCAAGGTGGAAATCAAAC	﻿DIQMTQSPSSLSASVGDRVTITCRASQSIGHYLNWYQQKPGKAPKLLIYAASSLQSGVPSRFSGSGSGAGFTLTVNGLQPEDLATYYCQQYYTTPPTFGQGTKVEIK		1.28		972.333	>1000
			C845		12m		Singlet		IGHV4-31	IGHJ4	﻿CAGGTGCAGCTGCAGGAGTCGGGCCCAGGACTGGTGAAGCCTTCACAGACCCTGTCCCTCACCTGCACTGTCTCTGGTGCCTCCATCAGCAGTGGTGAATACTACTGGAGCTGGGTCCGGCAGCCCCCAGGGAAGGGCCTGGAGTGGGTTGGCTATATCTACTATAGTGGGAGTACCTACTACAACCCGTCCCTCAAGAGTCGAGTTACCATATCAGTGGACACGTCTAAGAACCACTTCTCCCTGAAGCTGAAATCTCTGACAGCCGCGGACACGGCCGTGTATTTCTGTGCGACAGGGGGACTCTCCGCGTTCGGGGAATTATTTCCGCACGACAAGTGGGGCCAGGGAACCCTGGTCACCGTCTCCTCAG	﻿QVQLQESGPGLVKPSQTLSLTCTVSGASISSGEYYWSWVRQPPGKGLEWVGYIYYSGSTYYNPSLKSRVTISVDTSKNHFSLKLKSLTAADTAVYFCATGGLSAFGELFPHDKWGQGTLVTVSS		IGKV3-11	IGKJ3	﻿GAAATTGTGTTGACACAGTCTCCAGCCACCCTGTCTTTGTCTCCAGGGGAAAGAGCCACCCTCTCCTGCAGGGCCAGTCAGAGTGTTGGCAGCGACTTAGCCTGGTACCAACAGAAACCTGGCCAGGCTCCCAGGCTCCTCATCTATGATACATCCAACAGGGCCACTGGCATCCCAGCCAGGTTCAGTGGCAGTGGATCTGGGACAGACTTCACTCTCACCATCAGCAGCCTAGACCCTGCAGATTTTGCAGTTTATTACTGTCAGCAGCGTACCAACTGGCTGTTCAGTTTCGGCCCTGGGACCAAAGTGGATATCAAAC	﻿EIVLTQSPATLSLSPGERATLSCRASQSVGSDLAWYQQKPGQAPRLLIYDTSNRATGIPARFSGSGSGTDFTLTISSLDPADFAVYYCQQRTNWLFSFGPGTKVDIK		1.39		494.25	>1000
			C846		12m		Singlet		IGHV3-30	IGHJ4	﻿CAGGTGCAGCTGGTGGAGTCTGGGGGAGGCGTGTTCCAGCCTGGGAGGTCTCTGAGACTCTCCTGTGCAGCCTCTGGATTCAACTTCAGAACATATGCAATGCACTGGGTCCGCCAGGCTCCAGGCAAGGGGCTGGAGTGGGTGGCAGTTATTTTAGATGATGGAAGTGGTAAGTTCTACGCAGACTCCGTGAAGGGCCGATTCACCGTCTCCAGAGACAATTCCAAGCACACTCTCTATCTGCAAATGACCAGCCTGAGCGCTGAGGACACGGCTATATATTTCTGTGCGAGAGATCAGGGGACGGCGACAACGTACTTCGACCACTGGGGCCAGGGAACCCTGGTCACCGTCTCCTCAG	﻿QVQLVESGGGVFQPGRSLRLSCAASGFNFRTYAMHWVRQAPGKGLEWVAVILDDGSGKFYADSVKGRFTVSRDNSKHTLYLQMTSLSAEDTAIYFCARDQGTATTYFDHWGQGTLVTVSS		IGKV1-39	IGKJ1	﻿GACATCCAGATGACCCAGTCTCCATCCTCCCTGTCTGCATCTGTAGGAGACAGAGTCACTATCACTTGCCGGGCAAGTCAGAGCATTCGCACTTTTTTAAGTTGGTATCAGCAGAAAGCAGGGAAAGCCCCTAAACTCCTGATCTATACTGCATCCAGTTTGCAAAATGGGGTCCCATCAAGGTTCAGTGGCAGTGGATCTGGGACAGATTTCACTCTCACCATCAGCAGTCTGCAACCTGAAGATTTTGCAACTTACTACTGTCAACAGAGTTACGAAACCCCTCCGTGGACGTTCGGCCAAGGGACCAAGGTGGAAATCAAAC	﻿DIQMTQSPSSLSASVGDRVTITCRASQSIRTFLSWYQQKAGKAPKLLIYTASSLQNGVPSRFSGSGSGTDFTLTISSLQPEDFATYYCQQSYETPPWTFGQGTKVEIK		3.48		423.8	>1000
			C847		12m		clone		IGHV3-30	IGHJ4	﻿CAGGTGCAGCTGGTGGAGTCTGGGGGAGGCGTGGTCCAGCCTGGGGGGTCCCTGAGACTCTCCTGTGGAGCCTCTGGATTCACCTTCAGTAGCTATGCCATGCACTGGGTCCGCCAGGCTCCAGGCGAGGGGCTGGAGTGGGTGGCAGTTATATTATATGATGGAGCCGGTAAATTTTACGCGGACTCCGTGAAGGGCCGATTCACCATATCCAGAGACAATTCCAAGAACACACTGTATCTGCAAATGAACAGCCTGAGAGCTGAGGACACGGCTGTGTATTACTGTGCGAGAGACTACGGTGACTACGTTACACACTTTGACTACTGGGGCCAGGGAGCCCTGGTCACCGTCTCCTCAG	﻿QVQLVESGGGVVQPGGSLRLSCGASGFTFSSYAMHWVRQAPGEGLEWVAVILYDGAGKFYADSVKGRFTISRDNSKNTLYLQMNSLRAEDTAVYYCARDYGDYVTHFDYWGQGALVTVSS		IGKV1-39	IGKJ1	﻿GACATCCAGATGACCCAGTCTCCATCCTCCCTGTCTGCATCTGTAGGAGACAGAGTCACTATCACTTGCCGGGCAAGTCAGAGCATTAGCAGCTATTTAAATTGGTATCAGCAGAAACCAGGGAAAGCCCCTAAACTCCTGATCTATACTGCATCCAGTTTGCAAAGTGGGGTCCCATCAAGGTTCAGTGGCAGTGGCTCTGGGACAGATTTCACTCTCACCATCACCAGTCTGCAACCTGAAGATTTTGCAACTTACTACTGTCAACAGAGTTACAATACCCCACCGTGGACGTTCGGCCAAGGGACCAAGGTGGAAATCAAAC	﻿DIQMTQSPSSLSASVGDRVTITCRASQSISSYLNWYQQKPGKAPKLLIYTASSLQSGVPSRFSGSGSGTDFTLTITSLQPEDFATYYCQQSYNTPPWTFGQGTKVEIK		3.06		411.216	>1000
			C848		12m		Singlet		IGHV4-30	IGHJ4	﻿CAGGTGCAGCTGCAGGAGTCGGGCCCAGGACTGGTGAAGCCTTCACAGACCCTGTCCCTCACCTGCACTGTCTCTGGTGGCTCCATCAGCAGTGGTGATTACTACTGGAGTTGGATCCGCCAGCCCCCAGGGAAGGGCCTGGAGTGGATTGGCTACATCTATTACACTGGGATCACCTACTACAGACCGTCCCTCAAGAGTCGAGTTACCATATCAGTGGACACGTCCAAGAACCAGTTCTCCCTGAAGCTGAGCTCTGTGACTGCCGCAGACACGGCCGTCTTTTACTGTGCCAGAGTTGTCCGTCTATGGCCCAGGTACTTTGACTCCTGGGGCCAGGGAACCCTGGTCACCGTCTCCTCAG	﻿QVQLQESGPGLVKPSQTLSLTCTVSGGSISSGDYYWSWIRQPPGKGLEWIGYIYYTGITYYRPSLKSRVTISVDTSKNQFSLKLSSVTAADTAVFYCARVVRLWPRYFDSWGQGTLVTVSS		IGLV2-8	IGLJ3	﻿CAGTCTGCCCTGACTCAGCCTCCCTCCGCGTCCGGGTCTCCTGGACAGTCAGTCACCATCTCGTGCACTGGAACCAGCAGTGACGTTGGTACTTATGACTATGTCTCCTGGTACCAACAGCACCCGGGCAAAGCCCCCAAAGTCATAATTTATGAGGTCACTAAGCGGCCCTCAGGGGTCCCTGATCGCTTCTCTGGCTCCAAGTCTGGCAACACGGCCTCCCTGACCGTCTCTGGGCTCCAGGCTGAGGATGAGGCTCATTATTACTGCAGTACATATGCAGGCAGCGACAATTTGGAGTTCGGCGGAGGGACCAAGCTGACCGTCCTAG	﻿QSALTQPPSASGSPGQSVTISCTGTSSDVGTYDYVSWYQQHPGKAPKVIIYEVTKRPSGVPDRFSGSKSGNTASLTVSGLQAEDEAHYYCSTYAGSDNLEFGGGTKLTVL		2.23		>1000	>1000
			C849		12m		Singlet		IGHV1-2	IGHJ4	﻿CAGGTGCAGCTGGTGCAGTCTGGGGCTGAGGTGAAGAAGCCTGGGGCCTCAGTTAAGGTCTCCTGCAGGGCTTCTGGATACACGTTCACCGACCACTATATCCACTGGGTGCGACAGGCCCCTGGACAAGGGCTTGAGTGGATGGGATGGATCAACCCAAACAGTGGTGACACAAACTATCCACAGAAGTTTCAGGGCAGGGTCACCATGGCCAGGGACACGTCCATCAGCACAGCCCACATGGAGCTGAGGAGGCTGAAATCTGACGACACGGCCGTGTATTACTGTGCGAGGACGTCGTCCCCCCATAGCAGCTCGACAGGGGACTTTGACTCCTGGGGCCAGGGAACCCTGGTCACCGTCTCCTCAG	﻿QVQLVQSGAEVKKPGASVKVSCRASGYTFTDHYIHWVRQAPGQGLEWMGWINPNSGDTNYPQKFQGRVTMARDTSISTAHMELRRLKSDDTAVYYCARTSSPHSSSTGDFDSWGQGTLVTVSS		IGLV3-21	IGLJ3	﻿TCCTATGAGCTGACACAGCCACCCTCAGTGTCAGTGGCCCCAGGAAAGACGGCCAGGATTACCTGTGGGGGAGACGACATTGGAAGTAAAAGTGTGCACTGGTACCAGCAGAAGTCAGGCCAGGCCCCTGTGTTGGTCATCCATGATGATAGCGACCGGCCCTCAGGGATCCCTGAGCGATTCTCTGGCTCCAACTCTGGGAACACGGCCACCCTGACCATCAGCAGGGTCGAAGCCGGGGATGAGGCCGACTATTACTGTCAGGTGTGGGATTTTACTGGTGATCACCCGGGATGGGTGTTCGGCGGAGGGACCAAGCTGACCGTCCTA	﻿SYELTQPPSVSVAPGKTARITCGGDDIGSKSVHWYQQKSGQAPVLVIHDDSDRPSGIPERFSGSNSGNTATLTISRVEAGDEADYYCQVWDFTGDHPGWVFGGGTKLTVL		3.64		>1000	>1000
			C850		12m		clone		IGHV4-61	IGHJ4	﻿CAGGTGCAGCTGCAGGAGTCGGGCCCAGGACTGGTGAAGCCTTCGGAGACCCTGTCCCTCATCTGCTCTGTCTCTGGTGTCTCCGTCAGCAGTAGAAACTTCTTCTGGAGCTGGATCCGGCAGCCCCCAGGGAAGGGACTGGAGTGGATTGGGTATATGTCCTACGGAGGGAACACCAATTACAACCCCTCCCTCAAGAGTCGAGTCACCATATCAATAGACACGTCCAAGAACCAGTTCTCCCTGAAGCTGAGCTCTGTGACCGCTGCGGACACGGCCGTCTATTACTGTGCGAGAGAAACGTATTACTATGATAGAAGTGGTTATTATTCCTCTGACGGATTTGACTACTGGGGACAGGGAATCCTGGTCACCGTCTCCTCA	﻿QVQLQESGPGLVKPSETLSLICSVSGVSVSSRNFFWSWIRQPPGKGLEWIGYMSYGGNTNYNPSLKSRVTISIDTSKNQFSLKLSSVTAADTAVYYCARETYYYDRSGYYSSDGFDYWGQGILVTVSS		IGKV3-20	IGKJ2	﻿GAAATTGTGTTGACGCAGTCTCCAGGCACCCTGTCTTTGTCTCCAGGGGAAAGAGCCACCCTCTCCTGCAGGGCCAGTCAGAGTATTACCAGCAGCTCCTTAGCCTGGTACCAGCAGAAACGTGGCCAACCTCCCAGGCTCCTCATCTATGGTGCATCCAGCAGGGCCACTGGCATCCCAGACAGGTTCAGTGGCAGTGGGTCTGGGACAGACCTCACTCTCACAATCAGCAGACTGGAGCCTGAAGATTTTGCAGTGTATTACTGTCAGCAGTATGGTAACTCACCGTACACTTTTGGCCAGGGGACCAAGCTGGAGATCAAAC	﻿EIVLTQSPGTLSLSPGERATLSCRASQSITSSSLAWYQQKRGQPPRLLIYGASSRATGIPDRFSGSGSGTDLTLTISRLEPEDFAVYYCQQYGNSPYTFGQGTKLEIK		3.7		61.9253	436.208
			C851		12m		clone		IGHV4-39	IGHJ6	﻿CAGCTGCAGCTGCAGGAGTCGGGCCCAGGACTGGTGAAGACTTCGGAGACCCTGTCCCTCACCTGCACTGTCTCTGGTGGCTCCATCAGCAGCGGTAATTCCTACTGGGGCTGGATCCGCCAGCCCCCAGGGAAGGGACTGGAGTGGATTGGCGACATATATTATAGTGGGAGCACCTTCTACAACCCGTCCCTCAAGAGTCGACTCACCATATCCGTGGACACGTCCAAGAACCAGTTCTCCCTGAAGCTGACCTCTGTGACCGCCGCAGACACGGCTGTGTATTACTGTGCGAGACGAGGTGGCCGGACACCCGTTCGTTTTAATTACGGTGGGGACGTCTGGGGCCAAGGGACCACGGTCACCGTCTCCTCA	﻿QLQLQESGPGLVKTSETLSLTCTVSGGSISSGNSYWGWIRQPPGKGLEWIGDIYYSGSTFYNPSLKSRLTISVDTSKNQFSLKLTSVTAADTAVYYCARRGGRTPVRFNYGGDVWGQGTTVTVSS		IGKV1-33	IGKJ4	﻿GACATCCAGATGACCCAGTCTCCATCCTCCCTGTCTGCTTCTGTAGGAGACAGAGTCACCATCACTTGCCAGGCGAGTCAGGACATTAGCAGGTATTTAAATTGGTTTCAACATAAACCAGGAAAAGCCCCTAAGCTCCTGATCTACGATGCATCCAATTTGGAAGCAGGGGTCCCATCAAGGTTCACTGGAAGTGGATCTGGGACAGAGTTTACTTTCACCATCAGCAGCCTGCAGCCTGAAGATTTTGCAATATATTTCTGTCAACAGTATGATAGTCTCCCGCTCACTTTCGGCGGCGGGACCAAGGTGGAGATCA	﻿DIQMTQSPSSLSASVGDRVTITCQASQDISRYLNWFQHKPGKAPKLLIYDASNLEAGVPSRFTGSGSGTEFTFTISSLQPEDFAIYFCQQYDSLPLTFGGGTKVEI		2.83		12.9259	33.0957
			C852		12m		Singlet		IGHV1-2	IGHJ3	﻿CAGGTGCAGCTGGTGCAGTCTGGGGCTGAAGTGAAGAAACCTGGGGCCTCAGTGAAGGTCTCCTGCAAGGCTTCTGGATACATATTCACCGGCTTCTATATGCACTGGGTGCGACAGGCCCCTGGACAAGGGCCTGAGTGGATGGGATGGATCAACCCTAACAGTGGTGGCACAAACTATGCACAGAAGTTTCAGGGCAGGGTCACCATGACCAGGGACACGTCCATCAGCACAGCCTACATGGAGCTGAGCAGGCTGAGATCTGACGACACGGCCCTGTATTACTGTGCGAGAGGTGGCCAAGATGAGCTCACCGGCACTTTTGATGTCTGGGGCCAAGGGACAATGGTCACCGTCTCTTCAG	﻿QVQLVQSGAEVKKPGASVKVSCKASGYIFTGFYMHWVRQAPGQGPEWMGWINPNSGGTNYAQKFQGRVTMTRDTSISTAYMELSRLRSDDTALYYCARGGQDELTGTFDVWGQGTMVTVSS		IGLV3-21	IGLJ3	﻿TCCTATGAGCTGACTCAGCCACCCTCAGTGTCATTGGCCCCAGGAAAGACGGCCAGTATTACCTGTGGGGGAGACAGCATTGGAAGTAAAAGTGTACACTGGTACCAACAGAGGCCAGGCCAGGCCCCTATACTGGTCATCTATTATGATGGCGACCGGCCCTCAGGGATCCCTGAACGATTCTCTGGCTCCAACTCTGGGAACACGGCCACCCTGACCATCAGCAGGGTCGAAGCCGGGGATGAGGCCGACTATTACTGTCAGGTGTGGGATGGTGGTTGGGTGTTCGGCGGAGGGACCAAGCTGACCGTCCTA	﻿SYELTQPPSVSLAPGKTASITCGGDSIGSKSVHWYQQRPGQAPILVIYYDGDRPSGIPERFSGSNSGNTATLTISRVEAGDEADYYCQVWDGGWVFGGGTKLTVL		4.59		470.203	>1000
			C853		12m		Singlet		IGHV4-31	IGHJ4	﻿CAGGTGCAGCTGCAGGAGTCGGGCCCAGGACTGGTGAAGGCTTCACAGACCCTGTCCCTCACCTGCACTGTCTCTGGTGGCTCCTTCCGCAGTGGTGGTTACTACTACAACTGGATCCGCCAGCACCCAGGGAAGGGCCTGGAGTGGATTGGATATATCTTTTATACTGGGGTCACCTATTACAACCCGTCCCTCAAGAGTCGCGTTTCCATATCAGTGGACACGTCTAAGAACCAGCTCTCCCTGAACCTGACCTCTGTGACTGCCGCGGACACGGCCGTGTATTACTGTGCGAGGGGTTCCTACAGTGACTACAATGGGGGCTGGGACTACTGGGGCCGGGGAACCCTGGTCACCGTCTCCTC	﻿QVQLQESGPGLVKASQTLSLTCTVSGGSFRSGGYYYNWIRQHPGKGLEWIGYIFYTGVTYYNPSLKSRVSISVDTSKNQLSLNLTSVTAADTAVYYCARGSYSDYNGGWDYWGRGTLVTVS		IGLV2-8	IGLJ3	﻿CAGTCTGCCCTGACTCAGCCTCCCTCCGCGTCCGGGTCTCCTGGACAGTCAGTCACCATCTCCTGCATTGGAACCAGCAGTGACGTTGGTGGTTATAACTATGTCTCCTGGTACCAACACCACCCAGGCAAAGCCCCCAAACTCATCATTTATGAGGTCAGTAAGCGGCCCTCAGGGGTCCCTGATCGCTTCTCTGGCTCCAAGTCTGGCAACACGGCCTCCCTGACCGTCTCTGGGCTCCAGGCCGACGATGAGGCTGATTATTACTGCAGCTCATATGCGGGCAGCAACAATTGGGTGTTCGGCGGAGGGACCAAGCTGACCGTC	﻿QSALTQPPSASGSPGQSVTISCIGTSSDVGGYNYVSWYQHHPGKAPKLIIYEVSKRPSGVPDRFSGSKSGNTASLTVSGLQADDEADYYCSSYAGSNNWVFGGGTKLTV		2.3		11.4286	30.3662
			C854		12m		clone		IGHV3-53	IGHJ4	﻿GAGGTGCAGCTGGTGGAGTCTGGAGGAGGCTTGATCCAGCCTGGGGGGTCCCTGAGACTCTCCTGTGCAGCCTCGGGGATCACCGTCAGTAGCAACTATATGAACTGGGTCCGCCAGGCTCCAGGGAAGGGGCTGGAGTGGGTCTCAGTTCTTTATGCCGGTGGTAGTACATTTTACGCAGACTCCGTGAAGGGCCGATTCACCATCTCCAGAGACGATTCCAAGAACACACTGTATCTTCAAATGGACAGCCTGAGAGCCGAGGACACGGCCGTGTATTACTGTGCGAGAGATCTAAGCAGTAGCGGGGGATTTGACTACTGGGGCCAGGGAACCCTGGTCACCGTCTCCTCAG	﻿EVQLVESGGGLIQPGGSLRLSCAASGITVSSNYMNWVRQAPGKGLEWVSVLYAGGSTFYADSVKGRFTISRDDSKNTLYLQMDSLRAEDTAVYYCARDLSSSGGFDYWGQGTLVTVSS		IGKV3-20	IGKJ2	﻿GAAATTGTGTTGACGCAGTCTCCAGGCACCCTGTCTTTGTCTCCAGGGGAAAGAGCCACCCTCTCCTGCAGGGCCAGTCAGAGTGTTAGCAGCAGCTACTTAGCCTGGTATCAGCAGAAACCTGGCCAGGCTCCCAGGCTCCTCATCTATGGTGCATCCAGCAGGGCCACTGGCATCCCAGACAGGTTCAGTGGCAGGGGGTCTGGGACAGACTTCACTCTCACCATCAGCAGACTGGAGCCTGAAGATTTTGCAGTGTATTACTGTCAGCAGTATGGTAGCTTGTACACTTTTGGCCAGGGGACCAAGCTGGAGATCAAAC	﻿EIVLTQSPGTLSLSPGERATLSCRASQSVSSSYLAWYQQKPGQAPRLLIYGASSRATGIPDRFSGRGSGTDFTLTISRLEPEDFAVYYCQQYGSLYTFGQGTKLEIK		2.57		19.7293	107.133
			C855		6.2m		Singlet		IGHV3-30	IGHJ4	﻿CAGGTGCAGCTGGTGGAGTCTGGGGGAGGCGTGGTCCAGCCTGGGAGGTCCCTGAGACTCTCCTGTGCAGCCTCTGGATTCGCATTCAGTACCTATGGTATGCACTGGGTCCGTCAGACTCCAGGCAAGGGGCTGGCGTGGGTGGCGGCTATTTCATATGATGGACGTAATACATACTACGGAGACTCCGTGAAGGGCCGATTCACCATTACCAGAGACAATTCCAAGAACACGCTGTATTTGCAACTGAACAGTCTGAGAGATGAGGACACGGCTCTGTATTATTGTGCGAGAGATGCGACTATGATTACTCTGGTTCGGGGAATTATGGGACCACCCTTTGATCACTGGGGCCAGGGATCCCTGGTCACCGTCTCCTCAG	﻿QVQLVESGGGVVQPGRSLRLSCAASGFAFSTYGMHWVRQTPGKGLAWVAAISYDGRNTYYGDSVKGRFTITRDNSKNTLYLQLNSLRDEDTALYYCARDATMITLVRGIMGPPFDHWGQGSLVTVSS		IGKV1-33	IGKJ3	﻿QVQLVESGGGVVQPGRSLRLSCAASGFAFSTYGMHWVRQTPGKGLAWVAAISYDGRNTYYGDSVKGRFTITRDNSKNTLYLQLNSLRDEDTALYYCARDATMITLVRGIMGPPFDHWGQGSLVTVSS	﻿DIQMTQSPSSLSASVGDRVTISCQASQGISNYLNWYQQKPGKAPKLLIHDASILETGVPSRFSGSGSGTDFTFTISSLQPEDIATYYCQQYDNFPPDFGPGTKVDI		2.73		20.2827	41.6353
			C856		1.3m		Singlet		IGHV3-30	IGHJ4	﻿CAGGTGCAGCTGGTGGAGTCTGGGGGAGGCGTGGTCCAGCCTGGGAGGTCCCTGAGACTCTCCTGTGCAGCCTCTGGATTCACCTTCAGTAGCTATGGCATGCACTGGGTCCGCCAGGCTCCAGGCAAGGGGCTGGAGTGGGTGGCAGTTATATCATATGATGGAAGTAATAAATACTATGCAGACTCCGTGAAGGGCCGATTCACCATCTCCAGAGACAATTCCAAGAACACGCTGTATCTGCAAATGAGCAGCCTGAGAGCTGAGGACACGGCTGTGTATTACTGTGCGAAGCAAATCGGGGAATATTGTAGTGGTGGTAGCTGCTACCAGGGGAGTCTTGACTACTGGGGCCAGGGAACCCTGGTCACCGTCTCCTCAG	﻿QVQLVESGGGVVQPGRSLRLSCAASGFTFSSYGMHWVRQAPGKGLEWVAVISYDGSNKYYADSVKGRFTISRDNSKNTLYLQMSSLRAEDTAVYYCAKQIGEYCSGGSCYQGSLDYWGQGTLVTVSS		IGKV1-33	IGKJ3	﻿GACATCCAGATGACCCAGTCTCCATCCTCCCTGTCTGCATCTGTAGGAGACAGAGTCACCATCACTTGCCAGGCGAGTCAGGACATTAGCAACTATTTACATTGGTATCAGCAGAAACCAGGGAAAGCCCCTAAGCTCCTGATCTACGATGCATCCAATTTGGAAACAGGGGTCCCATCAAGGTTCAGTGGAAGTGGATCTGGGACAGATTTTACTTTCACCATCAGCAGCCTGCAGCCTGAAGATATTGCAACATATTACTGTCAACAGTATGATAATCTCCCATTCACTTTCGGCCCTGGGACCAAAGTGGATATCAAAC	﻿DIQMTQSPSSLSASVGDRVTITCQASQDISNYLHWYQQKPGKAPKLLIYDASNLETGVPSRFSGSGSGTDFTFTISSLQPEDIATYYCQQYDNLPFTFGPGTKVDIK		2.65		>1000	>1000
			C857		1.3m		Singlet		IGHV4-31	IGHJ4	﻿CAGGTGCAGCTGCAGGAGTCGGGCCCAGGACTGGTGAAGCCTTCACAGACCCTGTCCCTCACCTGCACTGTCTCTGGTGGCTCCATCAGCAGTGGTGGTTACTACTGGAGCTGGATCCGCCAGCACCCAGGGAAGGGCCTGGAGTGGATTGGGTACATCTATTACAGTGGGAGCACCTACTACAACCCGTCCCTCGAGAGTCGAGTTACCATATCAGTAGACACGTCTAAGAACCAGTTCTCCCTGAAGCTGAGCTCTGTGACTGCCGCGGACACGGCCGTGTATTACTGTGCGAGCGGGGAACTCTCCGCGTTCGGGGAGTTATTTCCGCACGACTACTGGGGCCAGGGAACCCTGGTCACCGTCTCCTCAG	﻿QVQLQESGPGLVKPSQTLSLTCTVSGGSISSGGYYWSWIRQHPGKGLEWIGYIYYSGSTYYNPSLESRVTISVDTSKNQFSLKLSSVTAADTAVYYCASGELSAFGELFPHDYWGQGTLVTVSS		IGKV3-11	IGKJ3	﻿GAAATTGTGTTGACACAGTCTCCAGCCACCCTGTCTTTGTCTCCAGGGGAAAGAGCCACCCTCTCCTGCAGGGCCAGTCAGAGTGTTAGCACCTACTTAGCCTGGTACCAACAGAAACCTGGCCAGGCTCCCAGGCTCCTCATCTATGATGCATCCAACAGGGCCACTGGCATCCCAGCCAGGTTCAGTGGCAGTGGGTCTGGGACAGACTTCACTCTCACCATCAGCAGCCTAGAGCCTGAAGATTTTGCAGTTTATTACTGTCAGCAGCGTAGCAACTGGCTATTCACTTTCGGCCCTGGGACCAAAGTGGATATCAAAC	﻿EIVLTQSPATLSLSPGERATLSCRASQSVSTYLAWYQQKPGQAPRLLIYDASNRATGIPARFSGSGSGTDFTLTISSLEPEDFAVYYCQQRSNWLFTFGPGTKVDIK		2.01		>1000	>1000
			C858		1.3m		Singlet		IGHV3-30	IGHJ4	﻿CAGGTGCAGCTGGTGGAGTCTGGGGGAGGCGTGGTCCAGCCTGGGAGGTCCCTGAGACTCTCCTGTGCAGCCTCTGGATTCACCTTCAGTAGCTATGCTATGCACTGGGTCCGCCAGGCTCCAGGCAAGGGGCTGGAGTGGGTGGCAGTTATATTATATGATGGAAGCAATAAATACTACGCAGATTCCGTGAAGGGCCGATTCACCATCTCCAGAGACAATTCCAAGAACACGCTGTATCTGCAAATGAACAGCCTGAGAGCTGAGGACACGGCTGTGTATTACTGTGCGAGAGATCAGGGGATGGCTACAACCTACTTTGACTACTGGGGCCAGGGAACCCTGGTCACCGTCTCCTCAG	﻿QVQLVESGGGVVQPGRSLRLSCAASGFTFSSYAMHWVRQAPGKGLEWVAVILYDGSNKYYADSVKGRFTISRDNSKNTLYLQMNSLRAEDTAVYYCARDQGMATTYFDYWGQGTLVTVSS		IGKV1-39	IGKJ1	﻿GACATCCAGATGACCCAGTCTCCATCCTCCCTGTCTGCATCTGTAGGAGACAGAGTCACCATCACTTGCCGGGCAAGTCAGAGCATTAGCAGCTATTTAAATTGGTATCAGCAGAAACCAGGGAAAGCCCCTAAGCTCCTGATCTATGCTGCATCCAGTTTGCAAAGTGGGGTCCCATCAAGGTTCAGTGGCAGTGGATCTGGGACAGATTTCACTCTCACCATCAGCAGTCTGCAACCTGAAGATTTTGCAACTTACTTCTGTCAACAGAGTTACAATACCCCTCCGTGGACGTTCGGCCAAGGGACCAAGGTGGAGATCAAAC	﻿DIQMTQSPSSLSASVGDRVTITCRASQSISSYLNWYQQKPGKAPKLLIYAASSLQSGVPSRFSGSGSGTDFTLTISSLQPEDFATYFCQQSYNTPPWTFGQGTKVEIK		3.27		>1000	>1000
			C859		6.2m		Singlet		IGHV1-2	IGHJ4	﻿CAGGTGCAGCTGGTGCAGTCTGGGGCTGAGCTGAAGAAGCCTGGGGCCTCAGTGAGGGTCTCCTGCAAGGCTTCTGGATACACCTTCACCGACTACTATATCCACTGGGTTCGACAGGCCCCTGGACAAGGGTTTGAGTGGATGGGCTGGATCAACCCTGACAGTGGTGGCACAAACTATCCACAGAACTTTCAGGGCAGGGTCACCATGACCAGGGGCACGTCCATCAGCACAGCCTACGTGGAACTGACCAGGCTGAGATTTGACGACACGGCCGTGTATTACTGTGCGAGGACGTCCTCCCCCCATAGCAGCTCGACAGGGGACCTTGACTACTGGGGCCAGGGAACCCTGGTCACCGTCTCCTC	﻿QVQLVQSGAELKKPGASVRVSCKASGYTFTDYYIHWVRQAPGQGFEWMGWINPDSGGTNYPQNFQGRVTMTRGTSISTAYVELTRLRFDDTAVYYCARTSSPHSSSTGDLDYWGQGTLVTVS		IGLV3-21	IGLJ3	﻿TCCTATGAGCTGACTCAGTCACCCTCAGTGTCAGTGGCCCCAGGAAAGACGGCCAGGATTACCTGTGGGGGAAGGGACATTGGAAGTAAAAGTGTGCACTGGTACCAGCAGAGGCCGGGCCAGGCCCCTGTGCTGGTCATCTCTTATGATAATGACCGGCCCTCAGGGATCCCTGAGCGATTCTCTGGCTCCAACTCTGGGAACACGGCCACCCTGACCATCAGCAGGGTCGAAGCCGGGGATGAGGCCGACTATTACTGTCAGGTGTGGGACGGTACTGGTGATCACCCGGGATGGGTGTTCGGCGGAGGGACCAGGCTGACCGTCCTAG	﻿SYELTQSPSVSVAPGKTARITCGGRDIGSKSVHWYQQRPGQAPVLVISYDNDRPSGIPERFSGSNSGNTATLTISRVEAGDEADYYCQVWDGTGDHPGWVFGGGTRLTVL		2.75		>1000	>1000
			C860		1.3m		Singlet		IGHV1-2	IGHJ3	﻿CAGGTGCAGCTGGTGCAGTCTGGGGCTGAGGTGAAGAAGCCTGGGGCCTCAGTGAAGGTCTCCTGCAAGGCTTCTGGATACACCTTCACCGGCTACTATATGCACTGGGTGCGACAGGCCCCTGGACAAGGGCTTGAGTGGATGGGATGGATCAACCCTAACAGTGGTGGCACAAACTATGCACAGAAGTTTCAGGGCAGGGTCACCATGACCAGGGACACGTCCATCAGCACAGCCTACATGGAGCTGAGCAGGCTGACATCTGACGACACGGCCGTGTATTACTGTGCGAGAGGTGGCCAAGATGAGCTCACCGGCGCTTTTGATATCTGGGGCCAAGGGACAATGGTCACCGTCTCTTCAG	﻿QVQLVQSGAEVKKPGASVKVSCKASGYTFTGYYMHWVRQAPGQGLEWMGWINPNSGGTNYAQKFQGRVTMTRDTSISTAYMELSRLTSDDTAVYYCARGGQDELTGAFDIWGQGTMVTVSS		IGLV3-21	IGLJ3	﻿TCCTATGAGCTGACTCAGCCACCCTCAGTGTCAGTGGCCCCAGGAAAGACGGCCAGGATTACCTGTGGGGGAAACAGCATTGGAAGTAAAAGTGTGCACTGGTACCAGCAGAAGCCAGGCCAGGCCCCTGTGCTGGTCATCTATTATGATAGCGACCGGCCCTCAGGGATCCCTGAGCGATTCTCTGGCTCCAACTCTGGGAACACGGCCACCCTGACCATCAGCAGGGTCGAAGCCGGGGATGAGGCCGACTTTCACTGTCAGGTGTGGGATAGTGGTTGGGTGTTCGGCGGAGGGACCAAGCTGACCGTCCTAG	﻿SYELTQPPSVSVAPGKTARITCGGNSIGSKSVHWYQQKPGQAPVLVIYYDSDRPSGIPERFSGSNSGNTATLTISRVEAGDEADFHCQVWDSGWVFGGGTKLTVL		2.61		>1000	>1000
			C861		1.3m		Singlet		IGHV4-31	IGHJ4	﻿CAGGTGCAGCTGCAGGAGTCGGGCCCAGGACTGGTGAAGCCTTCACAGACCCTGTCCCTCACCTGCACTGTCTCTGGTGGCTCCATCAGCAGTGGTGGTTACTACTGGGGCTGGATCCGCCAGCACCCAGGGAAGGGCCTGGAGTGGATTGGGTACATCTATTACAGTGGGAGCACCTACTACAACCCGTCCCTCAAGAGTCGAGTTACCATATCAGTAGACACGTCTAAGAACCAGTTCTCCCTGAAGCTGAGCTCTGTGACTGCCGCGGACACGGCCGTGTATTACTGTGCGAGGGGTTCCTACAGTAACTACAATGGGGGGTTGGACTACTGGGGCCAGGGAACCCTGGTCACCGTCTCCTCAG	﻿QVQLQESGPGLVKPSQTLSLTCTVSGGSISSGGYYWGWIRQHPGKGLEWIGYIYYSGSTYYNPSLKSRVTISVDTSKNQFSLKLSSVTAADTAVYYCARGSYSNYNGGLDYWGQGTLVTVSS		IGLV2-8	IGLJ3	﻿CAGTCTGCCCTGACTCAGCCTCCCTCCGCGTCCGGGTCTCCTGGACAGTCAGTCACCATCTCCTGCACTGGAACCAGCAGTGACGTTGGTGGTTATAACTATGTCTCCTGGTACCAACAGCACCCAGGCAAAGCCCCCAAACTCATGATTTATGAGGTCAGTAAGCGGCCCTCAGGGGTCCCTGATCGCTTCTCTGGCTCCAAGTCTGGCAACACGGCCTCCCTGACCGTCTCTGGGCTCCAGGCTGAGGATGAGGCTGATTATTACTGCAGCTCATATGCAGGCAGCAACAATTGGGTGTTCGGCGGAGGGACCAAGCTGACCGTCCTAG	﻿QSALTQPPSASGSPGQSVTISCTGTSSDVGGYNYVSWYQQHPGKAPKLMIYEVSKRPSGVPDRFSGSKSGNTASLTVSGLQAEDEADYYCSSYAGSNNWVFGGGTKLTVL		3.61		489.374	>1000
			C862		12m		singlet		IGHV4-30	IGHJ3	﻿CAGGTGCAGCTGCAGGAGTCGGGCCCAGGACTGGTGAAGCCTTCACAGACCCTGTCCCTCACCTGCACTGTCTCTGGTGCCTCCATCAGCAGTAGTGAACACTACTGGAGTTGGATCCGCCAGCCCCCAGGGAAGGGCCTGGAGTGGATTGGGTACATCTCTTATAGTGGGGGCACCTACCAAAACCCGTCCCTCCAGAGTCGAATGACCCTGTCAATGGACGCGTCCAAGAACCAGTTCTCCCTGAAGTTGAGCTCTGTGACTGCCGCAGACACGGCCGTGTATTTCTGTGCCAGACTAAATACTATGATCGTCATGATCAATGGTGTTTTTGATGTCTGGGGCCAAGGGACAATGGTCACCGTCTCTTCAG	﻿QVQLQESGPGLVKPSQTLSLTCTVSGASISSSEHYWSWIRQPPGKGLEWIGYISYSGGTYQNPSLQSRMTLSMDASKNQFSLKLSSVTAADTAVYFCARLNTMIVMINGVFDVWGQGTMVTVSS		IGKV1-33	IGKJ5	﻿GACATCCAGATGACCCAGTCTCCATCCTCCCTGTCTGCATTTGTAGGAGACAGAGTCACCATCACTTGCCAGGCGAGTCAGGACATCAATAAGTATGTAAATTGGTATCAGCAGAAACCAGGGAAAGCCCCTAAGCTCCTGATCTACGATGCATCCAATTTGCAAACAGGGGTCCCATCAAGGTTCAGTGGAAGTGGATCTGGGACACATTTTACTTTCACCATCAGCAGCCTGCAGCCTGAAGATTTTGCAACATATTACTGTCAAGAATATGATAATCTCTTTTCGATTAGTTTCGGCCAAGGGACACGACTGGAGATTAAAC	﻿DIQMTQSPSSLSAFVGDRVTITCQASQDINKYVNWYQQKPGKAPKLLIYDASNLQTGVPSRFSGSGSGTHFTFTISSLQPEDFATYYCQEYDNLFSISFGQGTRLEIK		2.14		>1000	>1000
			C863		12m		singlet		IGHV3-23	IGHJ6	﻿GAGGTGCAGCTGTTGGAGTCTGGGGGAGGCTTGGTACGGCCGGGGGGGTCCCTGAGACTCTCCTGTGCAGCCTCTGGATTCATCTTTGGCAGCTATGCCATGACCTGGGTCCGCCAGGCTCCAGGGAAGGGGCTGGAGTGGGTCTCTACTATTAGTGGTGGTGGAACTTCCACAGACTACGCAGACTCCGTGAAGGGCCATTTCACCATCTCAAGAGACAATGGCAAGAACACACTGTATCTGCAAATGAACAGCCTGAGAGCCGAGGACACGGCCGTATATTACTGTGTGAAAGAGAGTGATTATTATATGGCCAGTGTGAACGGTATGGACGTCTGGGGCCATGGGACCACGGTCACCGTCTCCTCA	﻿EVQLLESGGGLVRPGGSLRLSCAASGFIFGSYAMTWVRQAPGKGLEWVSTISGGGTSTDYADSVKGHFTISRDNGKNTLYLQMNSLRAEDTAVYYCVKESDYYMASVNGMDVWGHGTTVTVSS		IGKV3-20	IGKJ2	﻿GAAATTGTGTTGACGCAGTCTCCAGGCACCCTGTCTTTGTCTCCAGGGGAAAGAGCCACCCTCTCCTGCAGGGCCCGTCAGGGTGTTAGCAGCACCTACTTAGCCTGGTACCAGCAGAAACCTGGCCAGGCTCCCAGGCTCCTCATCTACGGTGCATCCAGCAGGGCCACTGGCATCCCAGACAGGTTCAGTGGCAGTGGGTCTGGGGCAGACTTCACACTCACCATCAGCAGACTGGAGCCTGAAGATTTTGCAGTATATTACTGTCAGCAGTATGGTACCTCACCGTACACTTTTGGCCAGGGGACCAAGCTGGAGATCAAAC	﻿EIVLTQSPGTLSLSPGERATLSCRARQGVSSTYLAWYQQKPGQAPRLLIYGASSRATGIPDRFSGSGSGADFTLTISRLEPEDFAVYYCQQYGTSPYTFGQGTKLEIK		3.31		167.323	>1000
			C864		12m		singlet		IGHV1-58	IGHJ3	﻿CAGGTGCAGCTGGTGCAGTCTGGGCCTGAGGTGAAGAAGCCTGGGACCTCAGTGAAGGTCTCCTGCAAGGCCTTTCAATTAAGTTTTAGTGTCTCTGCTGTGCAGTGGGTGCGACAGGCTCGTGGACAACGCCTTGAGTGGATAGGATGGATCGTCGTTGGCAGTGGCAACACAAACTACGCACAGAAGTTCCAGGAAAGAGTCACCATTACCAGGGACATGTCCACAAGTACAGTCTATATGGAGGTGCGCAGTCTAAGATCCGAGGACACGGCCGTGTATTATTGTGCGGCGCCCCAATGTAATCGCACCACCTGTTATGATGCTTTTGATATGTGGGGCCAAGGGACAATGGTCACCGTCTCTTCAG	﻿QVQLVQSGPEVKKPGTSVKVSCKAFQLSFSVSAVQWVRQARGQRLEWIGWIVVGSGNTNYAQKFQERVTITRDMSTSTVYMEVRSLRSEDTAVYYCAAPQCNRTTCYDAFDMWGQGTMVTVSS		IGKV3-20	IGKJ1	﻿GAAATTGTGTTGACGCAGTCTCCAGGCACCCTGTCTTTGTCTCCAGGGGAAAGAGCCACCCTCTCCTGCAGGGCCAGTCAGAGTGTTAACAGCAACTATTTAGCCTGGTACCAGCAAAAACCTGGCCAGGCTCCCAGGCTCCTCATCTTTGGTCCATCCAACAGGGCCACTGGCATCCCAGACAGGTTCAGTGGCAGTGGGTCTGGGACAGACTTCACTCTCACCATCAGTAGACTGGAGTCTGAAGATTTTGCAGTGTATTACTGTCAACAATATGGTAGCTCACCGTGGACGTTCGGCCAAGGGACCAAGGTGGAAATCAAAC	﻿EIVLTQSPGTLSLSPGERATLSCRASQSVNSNYLAWYQQKPGQAPRLLIFGPSNRATGIPDRFSGSGSGTDFTLTISRLESEDFAVYYCQQYGSSPWTFGQGTKVEIK		1.89		12.1375	31.8867
			C865		12m		singlet		IGHV3-23	IGHJ4	﻿GAGGTGCAGCTGTTGGAGTCTGGGGGAGGCTTGGTACAGCCGGGGGGGTCCCTAAGACTCTCCTGTGTAGCCTCTAGATTCATCTTTAGCAGATATGCCTTGAGCTGGGTCCGCCAGGCTCCAGGGAAGGGGCTGGAGTGGGTCTCAGGTATTAGTGGTAGTGGTCATAGCACACACTACGCAGACTCCGTGACGGGCCGGTTCACCATCTCCAGAGACAATTCCAAGAACACGGTGTATCTGCAAATGAGCAGCCTGAGAGCCGAGGACACGGCCGTATATTACTGTGCGAAAGGCCCGAGGAGTAACTACGACTACTTTGAGTCCTGGGGCCAGGGAACCCTGGTCACCGTCTCCTCAG	﻿EVQLLESGGGLVQPGGSLRLSCVASRFIFSRYALSWVRQAPGKGLEWVSGISGSGHSTHYADSVTGRFTISRDNSKNTVYLQMSSLRAEDTAVYYCAKGPRSNYDYFESWGQGTLVTVSS		IGKV1D-13	IGKJ4	﻿GACATCCAGTTGACCCAGTCTCCATCCTCCCTGTCTGCATCTGTCGGAGACAGAGTCACCATCACTTGCCGGGCAAGTCAGGGCATTAGCAGTGCTTTAGCCTGGTATCAGCAGAGACCAGGGAAAGCTCCTAGGCTCCTGATCTATGATGCCTCCAGTTTGGATAGTGGGGTCCCATCAAGGTTCAGCGGCAGTGGATCTGGGACAGATTTCACTCTCACCATCAGCAGCCTGCAGTCTGAAGACTTTGCAACTTATTACTGTCAACAGTTTATTAATAACCCGCTCACTTTCGGCGGAGGGACCAAGGTGGAAATCAAAC	﻿DIQLTQSPSSLSASVGDRVTITCRASQGISSALAWYQQRPGKAPRLLIYDASSLDSGVPSRFSGSGSGTDFTLTISSLQSEDFATYYCQQFINNPLTFGGGTKVEIK		2.14		>1000	>1000
			C866		12m		singlet		IGHV3-9	IGHJ4	﻿GAAGTGCAGCTGGTGGAGTCTGGGGGAGGCTTGGTACAGCCTGGCAGGTCCCTGAGACTCTCCTGTGTAGCCTCTGGATTCGAATTTGAAGATTATGGCATGCACTGGGTCCGGCAAGTTCCAGGGAAGGGCCTGGAGTGGGTCTCAGGTATTAGTTGGAACAGTGCTAGTGTAGGCTATGCGGACTCTGTGAGGGGCCGATTCACCATCTCCAGAGACAACGCCAAGAACTCCCTGTATCTGCAAATGAACAGTCTGAGAGCTGAGGACACGGCCTTATATTACTGTGGAAAACAGATAAATGAGTGGTCACACTTCCTTGACTACTGGGGCCAGGGAACCCTGGTCACCGTCTCCTCAG	﻿EVQLVESGGGLVQPGRSLRLSCVASGFEFEDYGMHWVRQVPGKGLEWVSGISWNSASVGYADSVRGRFTISRDNAKNSLYLQMNSLRAEDTALYYCGKQINEWSHFLDYWGQGTLVTVSS		IGKV1D-12	IGKJ2	﻿GACATCCAGTTGACCCAGTCTCCATCTTCTGTGTCTGCATCTGTAGGAGACAGAGTCACCATCACTTGTCGGGCGAGTCAGGGTATTAGCAACTGGTTAGCCTGGTATCAGAAGAAACCAGGGAAAGCCCCTAAACTCCTGATCTATGCTACATCCAGTTTGCAAAGTGGGGTCCCATCAAGGTTCAGCGGCAGTGGATCTGAGACAGATTTCACTCTCACTATCCGCAGCCTGCAGCCTGAAGATTTTGCAACTTACTATTGTCAACAGGCTAACAGTTACCCCTTAACTTTTGGCCAGGGGACCAAGCTGGAGATCAAAC	﻿DIQLTQSPSSVSASVGDRVTITCRASQGISNWLAWYQKKPGKAPKLLIYATSSLQSGVPSRFSGSGSETDFTLTIRSLQPEDFATYYCQQANSYPLTFGQGTKLEIK		2		>1000	>1000
			C867		12m		singlet		IGHV4-31	IGHJ3	﻿CAGGTGCAGCTGCAGGAGTCGGGCCCAGGACTGGTGAAGTCTTCAGAGACCCTGTCCCTCACCTGCACTGTCTCGAGTGGCTCCGTCAGGAGTGGTGGTTACTACTGGAGTTGGATCCGCCACCACCCAGGGAAGGGCCTGGAGTGGATTGGCTACATCTTTTACACTGGCATCACCTACTACAACCCGTCCCTCAAGAGTCGAGTTATTGTGTCAGTGGACCCGTCTAAGAACCAATTCTCCCTGAACCTGACCTCTGTGACTGCCGCGGACACGGCCGTCTATTACTGTGCGAGTACGCCTTATACTAATGGCGGGGCTTTTCATATCTGGGGCCAAGGGACAATGGTCACCGTCTCTTCAG	﻿QVQLQESGPGLVKSSETLSLTCTVSSGSVRSGGYYWSWIRHHPGKGLEWIGYIFYTGITYYNPSLKSRVIVSVDPSKNQFSLNLTSVTAADTAVYYCASTPYTNGGAFHIWGQGTMVTVSS		IGLV2-8	IGLJ3	﻿CAGTCTGCCCTGACTCAGCCTCCCTCCGCGTCCGGGTCTCCTGGCCAGTCAGTCACCATCTCCTGCACTGGCACCAGCAGTGACGTTGGTGGTCATAACTATGTCTCCTGGTACCAACAATTCCCAGGCAAAGCCCCCAAACTCATCATTTATGATGTCAATAAGCGGCCCTCAGGGGTCCCTGATCGCTTCTCTGGCTCCAAGTCTGCCAACACGGCCTCCCTGACCGTCTCTGGGCTCCAGGCTGAGGATGAGGCTGATTATCACTGCAGCTCATATGCCGGCAGCAACAATTGGGTGTTCGGCGGAGGGACCAAGCTGACCGTCCTA	﻿QSALTQPPSASGSPGQSVTISCTGTSSDVGGHNYVSWYQQFPGKAPKLIIYDVNKRPSGVPDRFSGSKSANTASLTVSGLQAEDEADYHCSSYAGSNNWVFGGGTKLTVL		2.71		13.474	37.2619
			C868		12m		singlet		IGHV4-61	IGHJ3	﻿CAGGTGCAGCTGCAGGAGTCGGGCCCAAGACTGGTGAAGCCTTCGGAGACCCTGTCCCTCACCTGCATTGTCTCCGGTGGCTCCGTCAGTAGTAATAATTTCTACTGGAGTTGGATCCGGCAGCCCCCAGGGAAGCGACTGGAGTGGATTGGGTATTTCTATAACAGTGGGAGCTCCAAGTATAATCCCTCCCTGAAGAGTCGAGTCACCATATCAGGAGACACGTCCAAGAACCAGTTCTCCCTGAAGCTGTCCTCTGTGACCGCTGCGGACACGGCCGTGTATTACTGTGCGAGAGAAACGTTTTTCTATGACAGGACTGGTCATTACAAATCCGATGGTTTTGATGTCTGGGGCCAAGGGACAATGGTCACCGTCTCTTCAG	﻿QVQLQESGPRLVKPSETLSLTCIVSGGSVSSNNFYWSWIRQPPGKRLEWIGYFYNSGSSKYNPSLKSRVTISGDTSKNQFSLKLSSVTAADTAVYYCARETFFYDRTGHYKSDGFDVWGQGTMVTVSS		IGKV1-5	IGKJ2	﻿GACATCCAGATGACCCAGTCTCCTTCCACCCTGTCTGCATCTGTGGGAGACAGAGTCACCATCAGTTGCCGGGCCAGTCAGAATATTAGTAGCTGGTTGGCCTGGTATCAGCAAGAAGCAGGGAAAGCCCCTAAGCTCCTGATCTATAAGGCGTCTAGTTTAGAAAGTGGGGTCCCATCGAGGTTCAGCGGCAGTGGATCTGGGACAGAGTTCACTCTCACCATCAGCAGCCTGCAGCCTGGTGATTTTGCAACTTATTACTGCCAACAGTATAATATTTATTCGTACACTTTTGGCCAGGGGACCAAGCTGGAGATCAAAC	﻿DIQMTQSPSTLSASVGDRVTISCRASQNISSWLAWYQQEAGKAPKLLIYKASSLESGVPSRFSGSGSGTEFTLTISSLQPGDFATYYCQQYNIYSYTFGQGTKLEIK		3.39		61.2638	238.399
			C869		12m		singlet		IGHV3-33	IGHJ4	﻿CAGGTGCAGCTGGTGGAGTCTGGGGGAGGCGTGGTCCAGCCTGGGACGTCCCTGAGACTCTCCTGTGCAGCGTCTGGATTCACCTTCAGTAGCTTTGGCATGAACTGGGTCCGCCAGGCTCCAGGCAAGGGCCTGGAGTGGGTGGCAGTTATATTCTTTGATGGGAGTAAAACATATTATGCAGACTCCGTGAAGGGCCGATTCACCATCTCCAGAGACAACTCCAAGAACACGCTGTATCTGCAAATGAACAGCCTGAGAACTGAGGACACGGCTGTGTATTACTGTGCGAAGGGGCAACTGCGTTTGGGGGAGTTCGATGACTACTGGGGCCAGGGAACCCTGGTCACCGTCTCCTCAG	﻿QVQLVESGGGVVQPGTSLRLSCAASGFTFSSFGMNWVRQAPGKGLEWVAVIFFDGSKTYYADSVKGRFTISRDNSKNTLYLQMNSLRTEDTAVYYCAKGQLRLGEFDDYWGQGTLVTVSS		IGKV1-6	IGKJ2	﻿GACATCCAGATGACCCAGTCTCCATCCTCCCTGTCTGCATCTGTTGGAGATAGAGTCACCATCACTTGCCGGGCAAGTCAGGACATTAGAGATGATTTAAACTGGTATCAACACAAACCAGGGAAAGCCCCGAAACTCCTGATCTATACTGCATCCAGTTTACAAAGTGGGGTCCCATCAAGGTTCAGCGGCAGTGGATCTGGCACAGATTTCACTCTCACCATCAGCAGGCTGCAGCCTGAGGATTTTGCAAGTTATTACTGCCTACAGGATCACAATTACCCGCTCACTTTTGGCCAGGGGACCAAGCTGGAGATCAAAC	﻿DIQMTQSPSSLSASVGDRVTITCRASQDIRDDLNWYQHKPGKAPKLLIYTASSLQSGVPSRFSGSGSGTDFTLTISRLQPEDFASYYCLQDHNYPLTFGQGTKLEIK		3.14		145.339	>1000
			C870		12m		singlet		IGHV3-48	IGHJ6	﻿GAGGTGCAGCTGGTGGAGTCTGGGGGAGGCTTGGTACAGCCTGGGAAGTCCCTGAGACTCTCCTGTGCAGGCTCTGGATTCGCCTTCAGTTCCTATCACATGAACTGGGTCCGCCAGGCTCCAGGGAAGGGTCTGGAGTGGGTTGCATATATTAGTAGTGGAAGTAGTACCATACACTACGCAGACTCTGTGAAGGGCCGATTCACCATCTCCAGGGACAATGCCAAGAACTCATTCTATCTGCAAATGAACAGCCTGAGAGCCGAGGACACGGCTCTGTATTACTGTGCGAGAGCTATAGTGGGAACGAAGGGTTACATGGACGTCTGGGGCAAGGGGACCACGGTCACCGTCTCCTCA	﻿EVQLVESGGGLVQPGKSLRLSCAGSGFAFSSYHMNWVRQAPGKGLEWVAYISSGSSTIHYADSVKGRFTISRDNAKNSFYLQMNSLRAEDTALYYCARAIVGTKGYMDVWGKGTTVTVSS		IGLV2-23	IGLJ3	﻿CAGTCTGCCCTGACTCAGCCTGCCTCCGTGTCTGGGTCTCCTGGACAGTCAGTCACCATCTCCTGCACTGGAACCCGCAGTGATGTTGGGAGTTATGACCTTGTCTCCTGGTACCAACTCCACGCAGACAAGGCCCCCAAACTCATAATTTATGAGGTCACTTCGCGGCCCTCAGGAATTTCTACTCGGTTCTCTGGCTCCAAGTCTGGCAACACGGCCTCCCTGACAATCTCTGGGCTCCAGGCTGAGGACGAGGCGGATTATTACTGCTGCTCATATGCAGGTACTACATGGCTGTTCGGCGGAGGGACCAGGCTGACCGTCCTAG	﻿QSALTQPASVSGSPGQSVTISCTGTRSDVGSYDLVSWYQLHADKAPKLIIYEVTSRPSGISTRFSGSKSGNTASLTISGLQAEDEADYYCCSYAGTTWLFGGGTRLTVL		2.17		>1000	>1000
			C950		12m		singlet		IGHV3-11	IGHJ6	﻿CAGGTGCAGCTGGTGGAGTCTGGGGGAGGCTTGGTCAAGCCTGGAGGGTCCCTGAGACTCTCCTGTGCAGCCTCTGGATTCACCTTCAGCGACTACTGCGTGACCTGGATCCGCCAGGCTCCAGGGAAGGGGCTGGAGTGGCTTTCATACAGTAATACTAATGATAGTAGTAGATCCTACGCAGACTCTGTGAAGGGCCGCTTCACCATCTCCAGGGACAACGCCAAGAATTCACTGTATCTGCAAATGGACAGCCTGAGAGCCGAAGACACGGCCGTGTATTACTGTGCGAGAAGGGGGGACGGAAACGTCCCGCTCTTCCATTATTACTATATGGACGTCTGGGGCAAAGGGACCACGGTCACCGTCTCCTCA	﻿QVQLVESGGGLVKPGGSLRLSCAASGFTFSDYCVTWIRQAPGKGLEWLSYSNTNDSSRSYADSVKGRFTISRDNAKNSLYLQMDSLRAEDTAVYYCARRGDGNVPLFHYYYMDVWGKGTTVTVSS		IGLV1-44	IGLJ2	﻿CAGTCTGTGCTGACTCAGCCACCCTCAGCGTCTGGGACCGCCGGGCAGAGGGTCACCATCTCTTGTTCTGGAGGCAGCTCCAACATCGGAAGTAATACTGTACACTGGTACCAACAACTCCCAGGAACGGCCCCCAAACTCCTCATCTATAGCAATTACAAGCGGCCCTCAGGGGTCCCTGACCGATTCTCTGGCTCCAAGTCTGGCGCCTCAGCCTCCCTGGCCATCAGTGGGCTCCAGTCTGAGGATGAGGCTGAATATTACTGTGCAGCATGGGACGACAGTGCGAATGGTCCGATATTCGGCGGAGGGACCAAACTGACCGTCCTAG	﻿QSVLTQPPSASGTAGQRVTISCSGGSSNIGSNTVHWYQQLPGTAPKLLIYSNYKRPSGVPDRFSGSKSGASASLAISGLQSEDEAEYYCAAWDDSANGPIFGGGTKLTVL		2.15		8.39664	51.1869
	COV47		C871		12m		clone		IGHV3-53	IGHJ4	﻿GAGGTGCAGCTGGTGGAGTCTGGAGGAGGCTTGATCCAGACGGGGGGGTCCCTGAAACTCTCCTGTGCAGCCTCTGGATTCATCGTCACTAATAACTACATGAGTTGGGTCCGCCAGGCTCCCGGGAAGGGGCTGGAGTGGGTCTCAGTGATTTATAGTGGTGGTACCACATATTATGCAGACTCCGTGAAGGGGCGATTCACCATCTCCAGAGACATTTCGAAGAACACGTTGTATCTTCAAATGAACAGCCTGAAAGCCGAGGATACGGCCGTGTATTATTGTGCGAGAGAGGGGGACGTAGAAGGGATTTCCGATTCCTGGAGTGGTTACTCTAGAGACCGCTACTATTTTGACCACTGGGGCCAGGGAACCCTGGTCACCGTCTCCTCAG	﻿EVQLVESGGGLIQTGGSLKLSCAASGFIVTNNYMSWVRQAPGKGLEWVSVIYSGGTTYYADSVKGRFTISRDISKNTLYLQMNSLKAEDTAVYYCAREGDVEGISDSWSGYSRDRYYFDHWGQGTLVTVSS		IGLV2-14	IGLJ1	﻿CAGTCTGCCCTGACTCAGCCTGCCTCCGTGTCTGGGTCTCCTGGACAGTCGATCACCATCTCCTGCACTGGAACCAGCAGTGACGTTGGTGGTTATAACTATGTCTCCTGGTACCAACAACACCCAGGCAAAGCCCCCAAACTCATGATTTATGATGTCAGTAATCGGCCCCCAACGATTTCTAATCGCTTCTCTGGCTCCAAGTCTGGCAATACGGCCTCCCTGATTATCTCTGGGCTCCAGCCTGAGGACGAGGCTGATTATTATTGCAGCTCATTTACAAGCAACAACACTCGAGTCTTCGGAACTGGGACCAAGGTCACCGTCCTAG	﻿QSALTQPASVSGSPGQSITISCTGTSSDVGGYNYVSWYQQHPGKAPKLMIYDVSNRPPTISNRFSGSKSGNTASLIISGLQPEDEADYYCSSFTSNNTRVFGTGTKVTVL		1.52		13.1519	32.2357
			C872		12m		clone		IGHV3-53	IGHJ4	﻿GAGGTGCAGCTGGTGGAGTCTGGAGGAGGCTTGATCCAGCCTGGGGGGTCCCTGAGACTCTCCTGTGCAGCCTCTGGGTTCATCGTCAGCAACAATTACATCAGCTGGGTCCGCCAGGCTCCAGGGAAGGGGCTGGAGTGGGTCTCAGTCATTTATAGCGGTGGAACGACATACTACGCAGACTCCGTGAAGGGCCGATTCAGCATCTCCAGAGACACTTCCAAGAACACAGTATATCTTCAAATAAACAACCTGAGAGCCGAGGACACGGCCGTGTATTATTGTGCAAGAGAGGGGGACGTAGACGGGAATTACGGTTTTTGGAGTGGATATTCTAGAGACCGTTATTACTTTGACTACTGGGGCCAGGGAACCCTGGTCACCGTCTCCTCAG	﻿EVQLVESGGGLIQPGGSLRLSCAASGFIVSNNYISWVRQAPGKGLEWVSVIYSGGTTYYADSVKGRFSISRDTSKNTVYLQINNLRAEDTAVYYCAREGDVDGNYGFWSGYSRDRYYFDYWGQGTLVTVSS		IGLV2-14	IGLJ1	﻿CAGTCTGCCCTGACTCAGCCTGCCTCCGTGTCTGGGTCTCCTGGACAGTCGATCACCATCTCCTGCACTGGAACCAGCAGTGACGTTGGTGCTTACAACTATGTCGCCTGGTACCAACAGCACCCAGGCAAAGCCCCCAAACTCATGGTTTATGATGTCAGTAAACGGCCCTCAGGGGTTTCTAATCGCTTCTCTGGCTCCAAGTCTGGCAACACGGCCTCCCTGACCATCTCTGGGCTCCAGACTGAGGACGAGGGTGATTATTACTGCTGCTCTTATACAACCAACACCACTCGAGTCTTCGGAACTGGGACCATGCTCACCGTCCTA	﻿QSALTQPASVSGSPGQSITISCTGTSSDVGAYNYVAWYQQHPGKAPKLMVYDVSKRPSGVSNRFSGSKSGNTASLTISGLQTEDEGDYYCCSYTTNTTRVFGTGTMLTVL		2.19		11.1778	56.8224
			C873		12m		singlet		IGHV1-2	IGHJ3	﻿CAGGTGCAGCTGGTGCAGTCTGGGCCTGAGGTGAAGAAGCCTGGGGCCTCAGTGAAGGTCTCCTGTAAGGCTTCTGGATACATCTTCACCGACTATTCTATACACTGGGTGCGACAGGCCCCTGGACAGGGGCTTGAGTGGATGGGATGGATCAACCCTAATAGTGGAGGCGGAAACTCTGCACAGATTTTTAAGGGCCGGGCCACCATGGCCAGGGACACAAGTATCACCACAGTTTATATGGACCTGAGTGGGCTGAGATCTGACGACACGGCCGTGTACTATTGTGCGAGAGGTCCCTTATTTCACAAAGTAGTCTACGAATCTTCGAGTGGCTTTCATGACGGCTTGGATTTCTGGGGCCAAGGGACAATGGTCACCGTCTCTTCAG			IGLV2-14	IGLJ3	﻿CAGTCTGCCCTGACTCAGCCTGCCTCCGTGTCTGGGTCTCCTGGACAGTCGGTCACCATCTCCTGCACTGGAACCAGCAGTGACGTTGGTGGTTACAACTTTTTGTCCTGGTATCAACAACACCCAGGCAAAGCCCCCAAACTCCTGCTTTATGAGGTCATTAATCGGCCCTCAGGGGTCTCTGATCGCTTCTCTGGCTCCAAGTCTGGCAACACGGCCTCCCTGACCATCTCTGGGCTCCAGGCTGAGGACGAGGCTGATTATTACTGCAACTCATATACAAGCAACTTCACTTGGGTGTTCGGCGGAGGGACCCACCTGACCGTCCT	﻿QSALTQPASVSGSPGQSVTISCTGTSSDVGGYNFLSWYQQHPGKAPKLLLYEVINRPSGVSDRFSGSKSGNTASLTISGLQAEDEADYYCNSYTSNFTWVFGGGTHLTV		4.05		5.2897	74.6384
			C874		12m		singlet		IGHV3-21	IGHJ4	﻿CAGGTGCAGCTGGTGGAGTCTGGGGGAGGCCTGGTCAAGCCTGGGGGGTCCCTGAGACTCACCTGTGCAGCCTCTGGATTCACCTTCAGTACCTATAGCATGAACTGGGTCCGCCAGGCTCCAGGGAAGGGGCTGGAGTGGGTCTCATCCATTAGTAGTAGTAATAGTTACATATACTACGCAGACTCAGTGAAGGGCCGATTCACCATCTCCAGAGACAACGCCAAGAACTCACTGTATCTGCAAATGAACAGCCTGAGAGCCGAGGACACGGCTGTGTATTACTGTGCGAGAGAGAGGGGGTATTACGGTGGTAAAACCCCCCCATTTCTTGGGGGCCAGGGAACCCTGGTCACCGTCTCCTCAG	﻿QVQLVQSGPEVKKPGASVKVSCKASGYIFTDYSIHWVRQAPGQGLEWMGWINPNSGGGNSAQIFKGRATMARDTSITTVYMDLSGLRSDDTAVYYCARGPLFHKVVYESSSGFHDGLDFWGQGTMVTVSS		IGLV6-57	IGLJ3	﻿AATTTTATGCTGACTCAGCCCCACTCTGTGTCGGAGTCTCCGGGGAAGACGGTAACCATCTCCTGCACCGGCAGCAGTGGCAGCATTGCCAGCAACTATGTGCAGTGGTACCAGCAGCGCCCGGGCAGTGCCCCCACCACTGTGATCTATGAGGATAACCAAAGACCCTCTGGGGTCCCTGATCGGTTCTCTGGCTCCATCGACAGCTCCTCCAACTCTGCCTCCCTCACCATCTCTGGACTGAAGACTGAGGACGAGGCTGACTACTACTGTCAGTCTTATGATAGCAGCAATTATTGGGTGTTCGGCGGAGGGACCAAGCTGACCGTCCTAG	﻿NFMLTQPHSVSESPGKTVTISCTGSSGSIASNYVQWYQQRPGSAPTTVIYEDNQRPSGVPDRFSGSIDSSSNSASLTISGLKTEDEADYYCQSYDSSNYWVFGGGTKLTVL		5.2		436.83	>1000
			C875		12m		clone		IGHV1-46	IGHJ5	﻿CAGGTGCAGCTGGTGCAGTCTGGGGCTGAGGTGAAGCAGCCTGGGGCCTCAGTGAAAATTTCCTGCAAGGCGTCCGGATACATATTCACCACCTACTTTATGCACTGGGTGCGACAGGCCCCTGGACAAGGGCTTGAGTGGCTGGGAATAATCGACCCTACTATTAGTGGCGCAAGCCTCGCACAGAAGTTCCAGGGCAGAGTCACCATGACCAGCGACACGTCCACGAGCACAGTTTACATGGAGATGAGGAGCCTGAGATCTGACGACACGGCCCTTTATTTTTGTGCTAGAGCGTCGACTTCGACTAGTAGTTGGAGCGAGGCCCTGTCCTTGGGCTCCTGGGGCCAGGGAACCCTGGTCACCGTCTCCTCA	﻿QVQLVQSGAEVKQPGASVKISCKASGYIFTTYFMHWVRQAPGQGLEWLGIIDPTISGASLAQKFQGRVTMTSDTSTSTVYMEMRSLRSDDTALYFCARASTSTSSWSEALSLGSWGQGTLVTVSS		IGLV1-40	IGLJ2	﻿CAGTCTGTGCTGACGCAGCCGCCCTCAGTGTCTGGGGCCCCGGGGCAGGGGGTCTCCATCTCCTGCACTGGGAGCAGCTCCAACGTCGGGGCAGGTTATGGTGTACACTGGTACCAACAACTTCCAGGAACAACTCCCAAACTCCTCATCTATGATAATAATAGTCGGCCCGCAGGGGTCCCTGACCGATTCTCTGGCTCCAAGTCTGGCACCTCAGCCTCCCTGGCCATCGCTGGGCTCCAGCCTGAGGATGAGGCTGATTACTACTGCCAGTCCTGGGACAATGGCCTGAGTGGTTCGGGGGTGGTTTTCGGCGGAGGGACCAAGGTGACCGTCCTAG	﻿QSVLTQPPSVSGAPGQGVSISCTGSSSNVGAGYGVHWYQQLPGTTPKLLIYDNNSRPAGVPDRFSGSKSGTSASLAIAGLQPEDEADYYCQSWDNGLSGSGVVFGGGTKVTVL		3.5		8.08934	49.4224
			C876		12m		clone		IGHV3-53	IGHJ4	﻿GAGGTGCAGCTGGTGGAGTCTGGAGGAGGCTTGATCCAGCCTGGGGGGTCCCTGAGACTCTCCTGTGCGGCCTCTGAATTTGTCATCAGCAGGAACTACATGAGTTGGGTCCGCCAGGCTCCAAAGAAGGGGCTGGAGTGGGTCTCAGTTCTTTATAGTGGTGGTAGCACATTCTACGCTGACTCCGTAAAGGGCCGATTCACCATCTCCAGAGACGATTCCAGGAATATGTTGTATCTTCAAATGAACAGCCTGAGAGCCGAAGACACGGCCGTCTATTATTGTGTTAGAGATTTTGGAGAGTTCTACTTTGACTACTGGGGCCAGGGAGTCCTGGTCACCGTCTCCTCAG	﻿EVQLVESGGGLIQPGGSLRLSCAASEFVISRNYMSWVRQAPKKGLEWVSVLYSGGSTFYADSVKGRFTISRDDSRNMLYLQMNSLRAEDTAVYYCVRDFGEFYFDYWGQGVLVTVSS		IGKV3-15	IGKJ1	﻿GAAATAGTGATGACGCAGTCTCCAACCACCCTGTCTGTGTCTCCAGGGGAAAGAGCCACCCTCTCCTGCAGGGCCAGTCAGAGTCTTAGTAGCAACTTAGCCTGGTACCAGCAGAAACCTGGCCAGGCTCCCAGGCTCCTCATCTTTGGTGTATCCACCAGGGCCACTGGTATCCCAGCCAGGTTCAGTGGCAGTGGGTCTGGGACAGAGTTCACTCTCACCATCAGCAGCCTGCAGTCTGAAGATTTTGCAGTTTACTACTGTCAGCAGTACTATAGTGGGCCTCGGACGTTCGGCCAAGGGACCAAGGTGGAGATCAAAC	﻿EIVMTQSPTTLSVSPGERATLSCRASQSLSSNLAWYQQKPGQAPRLLIFGVSTRATGIPARFSGSGSGTEFTLTISSLQSEDFAVYYCQQYYSGPRTFGQGTKVEIK		3.53		7.44469	38.026
			C877		12m		singlet		IGHV3-53	IGHJ6	﻿GAGGTGCAGCTGGTGGAGTCTGGAGGAGGCTTGATCCCGCCTGGGGGGTCCCTGAGACTCTCCTGTGCAGCCTCAGGGATCATCGTCAGTCGCAACTACATGAGCTGGGTCCGCCAGACTCCAGGGAAGGGGCTGGAGTGGGTCTCAGTTATGTATGCCGGTGGTACCAAAGAGTACGCAGACTCCGTGAAGGGCCGATTCATCATCTCCAGAGACGATTCCAACAACACTCTCTATCTTCAAATGAATAGCCTGAGAGCCGAGGACACGGCCGTGTATTACTGTGCGAGAGATCTGATTGTCCTTGGGGTGGACGTCTGGGGCCAAGGGACCACGGTCACCGTCTCCTCA	﻿EVQLVESGGGLIPPGGSLRLSCAASGIIVSRNYMSWVRQTPGKGLEWVSVMYAGGTKEYADSVKGRFIISRDDSNNTLYLQMNSLRAEDTAVYYCARDLIVLGVDVWGQGTTVTVSS		IGKV1-9	IGKJ2	﻿GACATCCAGTTGACCCAGTCTCCATCCTTCCTGTCTGCATCTGTAGGAGACAGAGTCACCATCACTTGCCGGGCCAGTCAGGGCATTAGCAATTATTTAGCCTGGTATCAGCAAAAACCAGGGAAAGCCCCTAAGCTCCTGATCTATGCTGCATCCACTTTGCAGAGTGGGGTCCCATCAAGGTTCAGCGGCAGTGGATCTGGGACAGAATTCACTCTCACAATCAGCAGCCTGCAGCCTGAAGATTTTGCAACTTATTACTGTCAACTGCTTAATAGTTACCCCATGTGCAGTTTTGGCCAGGGGACCAAGCTGGAGATCAAAC	﻿DIQLTQSPSFLSASVGDRVTITCRASQGISNYLAWYQQKPGKAPKLLIYAASTLQSGVPSRFSGSGSGTEFTLTISSLQPEDFATYYCQLLNSYPMCSFGQGTKLEIK		2.53		15.7107	48.0641
			C878		12m		clone		IGHV3-64	IGHJ4	﻿GAGGTGCAGCTGGTGGAGTCTGGGGGAGGCTTGGTCCAGCCTGGGGGGTCCCTGAGACTTTCCTGTTCAGTCTCAGGCTTCACCTTCAGTAACTTTGCTATGCACTGGGTCCGCCAGGCTCCAGGGAAGGGACTGGAATTTGTTTCAGGTGTAAGTAGTGATGGGGATATCACAGACTACGCAGACTCCGTGAAGGGCAGATTCACCATCTCCAGAGACAATTCCAAGAACACTCTATATCTTCAAATGAGCAGTCTGAGACCTGAGGACACGGCTGTGTATTATTGTGTGAAGGATAAGGAGCATTCAACTATGGTTACTATCTTTGACTTTTGGGGCCAGGGAACCCTGGTCACCGTCTCCTCAG	﻿EVQLVESGGGLVQPGGSLRLSCSVSGFTFSNFAMHWVRQAPGKGLEFVSGVSSDGDITDYADSVKGRFTISRDNSKNTLYLQMSSLRPEDTAVYYCVKDKEHSTMVTIFDFWGQGTLVTVSS		IGKV1-39	IGKJ3	﻿GACATCCAGATGACCCAGTCTCCATCCTCCCTGTCTGCATCTGTGGGAGACAGAGTCACCATCACTTGCCGGGCAAGTCAGAGCATTAGCAGCTTTTTAAATTGGTATCAGCAGAAACCAGGGAAAGCCCCTAAGCTCCTGATCTATGCTGCATCCAGTTTGCAAAGTGGGGTCCCATCGAGGTTCAGTGGCCGTGGATCTGGGGCAGATTTCACTCTCACCATCACCAGTCTGCAACCTGAAGATTTTGCAACTTACTTCTGTCAACAGAGTTACAGTTCCCACCTCACTTTCGGCCCTGGGACCAAAGTGGATATCAAAC	﻿DIQMTQSPSSLSASVGDRVTITCRASQSISSFLNWYQQKPGKAPKLLIYAASSLQSGVPSRFSGRGSGADFTLTITSLQPEDFATYFCQQSYSSHLTFGPGTKVDIK		2.88		>1000	>1000
			C879		12m		singlet		IGHV4-31	IGHJ4	﻿CAGGTGCAGCTGCAGGAGTCGGGCCCAGGGCTGGTGAAGCCCTCACAGACCCTGTCCCTCACTTGCGGTGTCTCTGGTGACTCCATCAGTAGTGGTGGTCATTTCTGGAGCTGGGTCCGGCAGCACCCAGGGACGGGCCTGGAGTGGATTGCCTACAGCCCTTTCAGTGGGACCACCTACTACAACCCGTCCCTCAAGAGTCGAGTGACCCTTTCAGTAGACACGTCGAAGAACCAGTTTTTCCTGAGCTTGACTTCTGTAACTGACGCGGACACGGCCGTCTATTTCTGTGCGAGAGTTAAGGGGTGGCTGAGGGGCTACTTTGACCACTGGGGCCAGGGAGTCCTGGTCACCGTCTCCTCAG	﻿QVQLQESGPGLVKPSQTLSLTCGVSGDSISSGGHFWSWVRQHPGTGLEWIAYSPFSGTTYYNPSLKSRVTLSVDTSKNQFFLSLTSVTDADTAVYFCARVKGWLRGYFDHWGQGVLVTVSS		IGLV6-57	IGLJ2	﻿AATTTTATGCTGACTCAGCCCCACTCTGTGTCGGAGTCTCCGGGGAAGACGGTGACCATCTCCTGCACCGCCTCCAGTGGCAACATTGTCAACAACTATGTGCAGTGGTACCAGCAGCGCCCGGGCAGTGCCCCCATCATTGTGATCTATGAAGATGCCCAAAGACCCTCTGGGGTCCCTGATCGGTTCTCTGGCTCCATCGACACCTCCTCCAATTCTGCCTCCCTCACCATCTCTGGACTGAAGACTGAGGACGAGGCTGACTACTACTGTCAGTCTTATGAGATCGACAGTCATGTCGTCTTCGGCGGTGGGACCAGACTGACCGTCCT	﻿NFMLTQPHSVSESPGKTVTISCTASSGNIVNNYVQWYQQRPGSAPIIVIYEDAQRPSGVPDRFSGSIDTSSNSASLTISGLKTEDEADYYCQSYEIDSHVVFGGGTRLTV		4.25		181.337	>1000
			C880		12m		singlet		IGHV4-34	IGHJ4	﻿CAGGTGCAGCTACAGCAGTGGGGCGCAGGACTGTTGAAGCCTTCGGAGACCCTGTCCCTCACCTGCGCTGTTTATGGTGGGTCCTTCAGTGATTACTACTGGAGTTGGATCCGCCAGCCCCCAGGGAAGGGCCTGGAGTGGATTGGGGAAAACAATCATAGTGGAAAAACCAACTACAACCCGTCCCTCGAGAATCGAGTCACCATATCAGTGGACACGTCCAAGAATCAGTTCTCCCTGAAATTGACCTCTGTGACCGCCGCGGACACGGCTGTGTATTACTGTGCGAGAGAGAGTGGGAGCTACGGCACCTTTGACTACTGGGGCCAGGGAACCCTGGTCACCGTCTCCTCAG	﻿QVQLQQWGAGLLKPSETLSLTCAVYGGSFSDYYWSWIRQPPGKGLEWIGENNHSGKTNYNPSLENRVTISVDTSKNQFSLKLTSVTAADTAVYYCARESGSYGTFDYWGQGTLVTVSS		IGKV3-20	IGKJ1	﻿GAAATTGTGTTGACGCAGTCTCCAGGCACCCTGTCTTTGTCTCCAGGGGAAAGAGCCACCCTCTCCTGCAGGGCCAGTCAGAGTGTAAGTAGCGCCTACTTAGCCTGGTACCAGCAAAAACCTGGCCAGGCTCCCAGGCTCCTCATCTATGGAGCTTCCAGCAGGGCCACTGGCATCCCAGACAGGTTCAGTGGCAGTGGGTCTGGGACAGACTTCACTCTCACCATCAGCAGACTGGAGCCTGAAGATTTTGCAGTGTATTTCTGTCAGCAGTATGCTTATACAATCTGGACGTTCGGCCAAGGGACCAAGGTGGAAATCAAAC	﻿EIVLTQSPGTLSLSPGERATLSCRASQSVSSAYLAWYQQKPGQAPRLLIYGASSRATGIPDRFSGSGSGTDFTLTISRLEPEDFAVYFCQQYAYTIWTFGQGTKVEIK		2.2		23.8264	332.322
			C881		12m		clone		IGHV3-53	IGHJ4	﻿GAGGTGCAGCTGGTGGAGTCTGGAGGAGGCTTGATCCAGCCTGGGGGGTCCCTGAGGCTCTCATGTGCAGTCTCTGGCGTCGCCGTCAGTACCAACTACATGAGCTGGGTCCGCCAGGCTCCAGGGCAGGGACTGGAGTGGGTCTCAACTATTTATAGCGGTGACACCACGTACTACTCAGACTCCGTGAAGGGCCGATTCACCATCTCCAGAGACAATTCCAAGAACACTTTCTATCTTCAAATGAACAGCCTGAGAGTCCCTGACACGGCCGTGTATTACTGTGCGAGACTGGGGGGAGTATTTAATGGATTCAACGGATCCTTTGATTATTGGGGCCAGGGAACCCTGGTCACCGTCTCCT	﻿EVQLVESGGGLIQPGGSLRLSCAVSGVAVSTNYMSWVRQAPGQGLEWVSTIYSGDTTYYSDSVKGRFTISRDNSKNTFYLQMNSLRVPDTAVYYCARLGGVFNGFNGSFDYWGQGTLVTVS		IGLV2-23	IGLJ3	﻿CAGTCTGCCCTGACTCAGCCTGCCTCCGTCTCTGGGTCTCCTGGACAGTCGATCACCATCTCCTGCATTGGAACCAGCAGTGATTTTGAAAATTATAACCTTGTCTCCTGGTACCAACAACACCCAGGCAAAGCCCCCAAAGTCATGATTTATGAGGACACTAAGCGGCCCTCAGGGGTTTCTAATCGCTTCTCTGGTTCCAAGTCTGCCAACACGGCCTCCCTGACAATCTCTGGGCTCCAGGCTGAGGACGAGGCTGAATATTACTGCTGCTCATATGCAGGTGCCAGCACTTGGGTGTTCGGCGGAGGGACCAGGGTGACCGTCGTAG	﻿QSALTQPASVSGSPGQSITISCIGTSSDFENYNLVSWYQQHPGKAPKVMIYEDTKRPSGVSNRFSGSKSANTASLTISGLQAEDEAEYYCCSYAGASTWVFGGGTRVTVV		1.44		9.84637	57.4133
			C882		12m		singlet		IGHV3-33	IGHJ4	﻿CAGGTGCAGCTGGTGGAGTCTGGGGGAGGCGTGGTCCAGCCTGGGAGGTCCCTGAGACTCTCCTGTGCAGCGTCTGGATTCACTTTCATTAGATACAACATGCACTGGGTCCGCCAGGCTCCAGGCAAGGGGCTGGAGTGGGTGGCAGTTATATGGTATGATGGAAGTAATAAATACTATGCGGACTCCGTGAAGGGCCGATTCACCATCTCCAGAGACAATTCCAAGAATACCTTGTATCTGCAAATGAACAGCCTGAGAGCCGAGGACACGGCTGTGTATTATTGTGCGAGAGATCCTATGATAGTAGTGGTCGAAATGGACTACTGGGGCCAGGGAACCCTGGTCACCGTCTCCTCAG	﻿QVQLVESGGGVVQPGRSLRLSCAASGFTFIRYNMHWVRQAPGKGLEWVAVIWYDGSNKYYADSVKGRFTISRDNSKNTLYLQMNSLRAEDTAVYYCARDPMIVVVEMDYWGQGTLVTVSS		IGKV2-30	IGKJ2	﻿GATGTTGTGATGACTCAGTCTCCACTCTCCCTGCCCGTCACCCTTGGACAGCCGGCCTCCATCTCCTGCAACTCTAGTCAAAGCCTCGTACACACTGATGGAAACACCTACTTGAATTGGTTTCAGCAGAGGCCAGGCCAATCTCCAAGGCGCCTCATTTATAAGGTTTCTAACCGGGACTCTGGGGTCCCAGACAGATTCAGCGGCAGTGGGTCCGACACTGATTTCACACTGCAAATCAGCAGGGTGGAGGCTGACGATGTTGGCGTTTATTACTGCATGCAAGGTTCACACTGGCCGTACACTTTTGGCCAGGGGACCAAGCTGGAGATCAAAC	﻿DVVMTQSPLSLPVTLGQPASISCNSSQSLVHTDGNTYLNWFQQRPGQSPRRLIYKVSNRDSGVPDRFSGSGSDTDFTLQISRVEADDVGVYYCMQGSHWPYTFGQGTKLEIK		2.9		>1000	>1000
			C884		6.2m		singlet		IGHV4-34	IGHJ4	﻿CAGGTGCAGCTACAGCAGTGGGGCGCAGGGCTGCTGAAGCCTTCGGAGACCCTGTCCCTCACCTGCGTTGTCTATGGTGGGTCCTTCAGTGCTTACTACTGGAGCTGGATCCGCCAGCCCCCAGGGAAGGGGCTGGAATGGATTGGGGAAATCAATCATAGTGGAAGCACCAACTACAAGTCGTCCCTCCAGAGTCGAGTCACCATTTCAGTAGACACGTCCAAGAACCAGTTCTCCCTGAAGCTGAGCTCTGTGACCGCCGCGGACACGGCTGTCTATTATTGTGCGAGAGAGACTGGGACCTACGGCACGTTTGACCACTGGGGCCAGGGAACTCTGGTCACCGTCTCCTCAG	﻿QVQLQQWGAGLLKPSETLSLTCVVYGGSFSAYYWSWIRQPPGKGLEWIGEINHSGSTNYKSSLQSRVTISVDTSKNQFSLKLSSVTAADTAVYYCARETGTYGTFDHWGQGTLVTVSS		IGKV3-20	IGKJ1	﻿GAAATTGTGTTGACGCAGTCTCCAGGCACCCTGTCTTTGTCTCCAGGGGAAAGAGCCACCCTCTCCTGCAGGGCCAGTCAGAGTGTTAGCAGCACCTACTTAGCCTGGTACCAGCAGAAACCTGGCCAGGCTCCCAGGCTCCTCATCTATGGTGCGTCCAGCAGGGCCACTGGCATCCCAGACAGGTTCAGTGGCAGTGGGTCTGGGACAGACTTCACTCTCACCATCAGCAGACTGGAGCCTGAAGATTTTGCAGTGTATTACTGTCAGCAGTATGCTTTTTCGGTCTGGACGTTCGGCCAAGGGACCAAGGTGGAAATCAA	﻿EIVLTQSPGTLSLSPGERATLSCRASQSVSSTYLAWYQQKPGQAPRLLIYGASSRATGIPDRFSGSGSGTDFTLTISRLEPEDFAVYYCQQYAFSVWTFGQGTKVEI		4.22		37.1439	>1000
			C885		1.3m		singlet		IGHV4-31	IGHJ4	﻿CAGGTGCAGCTGCAGGAGTCGGGCCCAGGACTTGTGAAGCCTTCACAGACCCTGTCCCTCACCTGCGCTGTCTCTGGTGACTCCATCCGTAGTGGTGGTTACTACTGGAGCTGGGTCCGGCAGCACCCAGGGAGGGGCCTGGAGTGGATTGGCTACATCTATTTCAGTGGGACCACCTACTACAACCCGTCCCTCAAGAGTCGAGTGACCATTTCAGTAGACACGTCTGAGAAGCAGTTTTCCCTGAAGTTGACTTCTGTAACTGACGCGGACACGGCCGTGTATTTCTGTGCGAGAGTTAAGGGGTGGCTAAGGGGCTACTTTGACTACTGGGGCCAGGGAGCCCTGGTCACCGTCTCCTCAG	﻿QVQLQESGPGLVKPSQTLSLTCAVSGDSIRSGGYYWSWVRQHPGRGLEWIGYIYFSGTTYYNPSLKSRVTISVDTSEKQFSLKLTSVTDADTAVYFCARVKGWLRGYFDYWGQGALVTVSS		IGLV6-57	IGLJ2	﻿AATTTTATGCTGACTCAGTCCCACTCTGTGTCGGAGTCTCCGGGGAAGACGGTAACCATCTCCTGCACCGGCAGCAGTGGCAACATTGTCAACAACTATGTGCAGTGGTATCAGCAGCGCCCGGGCAGTGCCCCCATCATTGTGATCTATGAGGATACCCAAAGACCCTCTGGGGTCCCTGATCGGTTCTCTGGCTCCATCGACACCTCCTCCAACTCTGCCTCCCTCACCATCTCTGGGCTGAAGACTGAGGACGAGGCTGACTACTACTGTCAGTCTTATGATAGCGGCAGTCATGTCGTCTTCGGCGGTGGGACCAAACTGACCGTCCT	﻿NFMLTQSHSVSESPGKTVTISCTGSSGNIVNNYVQWYQQRPGSAPIIVIYEDTQRPSGVPDRFSGSIDTSSNSASLTISGLKTEDEADYYCQSYDSGSHVVFGGGTKLTV		7.45		>1000	>1000
			C886		12m		singlet		IGHV3-48	IGHJ4	﻿GAGGTGCAGCTGGTGGAGTCTGGGGGAGACTTGGTACAGCCTGGGGGGTCCCTGAGACTCTCCTGTGCAGCCTCTGGATTCAGCGTCACAACCAATGCCATGGCCTGGGTCCGCCAGGCTCCAGGGAAGGGGCTGGAGTGGATTTCATATATTAATATAGGTAGTGCTAATATACAGTATGCTGACTCTGTGAAGGGCCGATTCACCATCTCCAGAGACAACGCCAAGAACTCACTGTATCTGCAAATGAATAGCCTGAGAGACGAGGACACGGCTGTCTATTACTGTGCGAGAGGTGATTGTACTAGCAGCAGTTGTTATAGTTTGGACTACTGGGGCCAGGGAGCCCTGGTCACCGTCTCCTCAG	﻿EVQLVESGGDLVQPGGSLRLSCAASGFSVTTNAMAWVRQAPGKGLEWISYINIGSANIQYADSVKGRFTISRDNAKNSLYLQMNSLRDEDTAVYYCARGDCTSSSCYSLDYWGQGALVTVSS		IGKV1-39	IGKJ4	﻿GACATCCAGATGACCCAGTCTCCATCCTCCCTGTCTGCATCTGTAGGGGACAGAGTCTCCATCACTTGCCGGGCAAGTCAGACCATTAATACTCATTTAAGTTGGTATCTGCAGAAACCAGGCGAAGCCCCTAGGCTCCTGGTCTATGCTGCATCCACTTTACACAGTGGGGTCCCATCAAGGTTCAGTGGCAGTGGATCTGGGACAGATTTCACTCTCACCATCAGTAGTCTGCAACCTGAAGACTTTGCAACTTTCTACTGTCAACAGACTTACAGATTCCCCCTCACTTTCGGCGGAGGGACCAAGGTGGAAATCAAAC	﻿DIQMTQSPSSLSASVGDRVSITCRASQTINTHLSWYLQKPGEAPRLLVYAASTLHSGVPSRFSGSGSGTDFTLTISSLQPEDFATFYCQQTYRFPLTFGGGTKVEIK		2.48		78.2834	>1000
			C887		6.2m		singlet		IGHV3-48	IGHJ4	﻿GAGGTGCAGCTGGTGGAGTCTGGGGGAGACTTGGTACAGCCTGGGGGGTCCCTGAGACTCTCCTGTGCAGCCTCTGGATTCACCTTCACTACCTATAGCATGAGCTGGGTCCGCCAGGCTCCAGGGAAGGGGCTGGAGTGGATTTCATATATTAACAGTGGTAGTGCAAACATACACTACGCAGACTCTGTGAAGGGCCGATTCACCGTCTCCAGAGACAATGCCAAGAACTCACTGTATCTGCAAATGAATAGCCTGAGAGACGAGGACACGGCTGTTTATTATTGTGCGAGAGGTGATTGTCTTAGCAGCAGTTGTTATAGTTTGGACTACTGGGGCCAGGGAGCCCTGGTCACCGTCTCCTCAG	﻿EVQLVESGGDLVQPGGSLRLSCAASGFTFTTYSMSWVRQAPGKGLEWISYINSGSANIHYADSVKGRFTVSRDNAKNSLYLQMNSLRDEDTAVYYCARGDCLSSSCYSLDYWGQGALVTVSS		IGKV1-39	IGKJ4	﻿GACATCCAGATGACCCAGTCTCCATCCTCCCTGTCTGCATCTGTAGGAGACAGAGTCACCATCACTTGCCGGGCAAGTCAGAGCATTACCAGCTATTTAAGCTGGTATCTGCAGAAACCAGGGGAAGCCCCTAAGCTCCTGATCTATGCTGCATCCATTTTACAAAGTGGGGTCCCATCAAGGTTCGGTGGCAATGGATCTGGGACAGATTTCACTCTCACCATCAGCAGTCTGCAACCTGAAGATTTTGCAACTTTCTACTGTCAACAGACTTACCGTTCCCCCCTCACTTTCGGCGGGGGGACCAAGGTGGAGATCAAAC	﻿DIQMTQSPSSLSASVGDRVTITCRASQSITSYLSWYLQKPGEAPKLLIYAASILQSGVPSRFGGNGSGTDFTLTISSLQPEDFATFYCQQTYRSPLTFGGGTKVEIK		2.53		2.07099	11.0438
			C888		1.3m		singlet		IGHV3-66	IGHJ4	﻿GAGGTGCAGCTGGTGGAGTCTGGGGGAGGCTTGGTCCAGCCTGGGGGGTCCCTGAGACTCTCCTGTGCAGCCTCTGGATTCACCGTCAGTAGCAACTACATGAGCTGGGTCCGCCAGGCTCCAGGGAAGGGGCTGGAGTGGGTCTCAGTTATTTATAGCGGTGGTAGCGCATACTACGCAGACTCCGTGAAGGGCAGATTCACCATCTCCAGAGACAATTCCAAGAACACGCTGTATCTTCAAATGAACAGCCTGAGAGCCGAGGACACGGCTGTGTATTACTGTGCGAGAGATCTTAGGGATCAAGACGGGTACAGCTATGGGGCGTTTGACTACTGGGGCCAGGGAACCCTGGTCACCGTCTCCTCAG	﻿EVQLVESGGGLVQPGGSLRLSCAASGFTVSSNYMSWVRQAPGKGLEWVSVIYSGGSAYYADSVKGRFTISRDNSKNTLYLQMNSLRAEDTAVYYCARDLRDQDGYSYGAFDYWGQGTLVTVSS		IGLV2-14	IGLJ3	﻿CAGTCTGCCCTGACTCAGCCTGCCTCCGTGTCTGGGTCTCCTGGACAGTCGATCACCATCTCCTGCACTGGAACCAGCAGTGACGTTGGTGGTTATAACTATGTCTCCTGGTACCAACAACACCCAGGCAAAGCCCCCAAACTCATGATTTATGATGTCAGTAATCGGCCCTCAGGGGTTTCTAATCGCTTCTCTGGCTCCAAGTCTGGCAACACGGCCTCCCTGACCATCTCTGGGCTCCAGGCTGAGGACGAGGCTGATTATTACTGCAGCTCATATACAAGCAGCAGCTCCTGGGTGTTCGGCGGAGGGACCAAGCTGACCGTCCTAG	﻿QSALTQPASVSGSPGQSITISCTGTSSDVGGYNYVSWYQQHPGKAPKLMIYDVSNRPSGVSNRFSGSKSGNTASLTISGLQAEDEADYYCSSYTSSSSWVFGGGTKLTVL		1.44		85.8356	469.414
			C889		12m		singlet		IGHV3-66	IGHJ4	﻿GAGGTGCAGCTGGTGGAGTCTGGGGGAGGCTTGGTCCAGCCTGGGGGGTCCCTGAGACTCTCCTGTGCAGTCTCTGGATTCACCGTCAGTAGTAATTACATGACCTGGGTCCGCCAGGCTCCAGGGAAGGGGCTGGAGTGGGTCTCACTTATTTATAGCGGCACTAGTGCATTTTACGCAGACTCCGTGAAGGGCAGATTCACCATCTCCAGAGACAATTCCAAGAACACGCTGTATCTTCAGATGAGCAGTCTGAGAGTCAATGACACGGCTATATATTATTGTGCGAGAGACCTTAGGAAAGATGACGGGTACAGCTATGGGGCGTTTGACTACTGGGGCCAGGGAACCCTGGTCACCGTCTCCTCAG	﻿EVQLVESGGGLVQPGGSLRLSCAVSGFTVSSNYMTWVRQAPGKGLEWVSLIYSGTSAFYADSVKGRFTISRDNSKNTLYLQMSSLRVNDTAIYYCARDLRKDDGYSYGAFDYWGQGTLVTVSS		IGLV2-14	IGLJ3	﻿CAGTCTGCCCTGACTCAGCCTGCCTCCGTGTCTGGGTCTCCTGGACAGTCGATCACCATCTCCTGTTCTGGAACCAGCAGTGACGTTGGCGCTCATAACTATGTCTCCTGGTATCAGCAATATCCAGGCAAAGCCCCCAAACTCATGATTTTTGATGTCACTGATCGTCCCTCAGGGGTTTCCAATCGCTTCTCTGGTTCCAAGTCTGGCAACACGGCCTCCCTGACCATCTCTGGGCTCCAGGCTGAGGACGAGGCTGATTATTACTGCACTTCATATACAACCAACAGGTCCTGGGTGTTCGGCGGCGGGACCAAGGTGACCGTCCTAG	﻿QSALTQPASVSGSPGQSITISCSGTSSDVGAHNYVSWYQQYPGKAPKLMIFDVTDRPSGVSNRFSGSKSGNTASLTISGLQAEDEADYYCTSYTTNRSWVFGGGTKVTVL		4.25		6.07021	70.1212
			C890		12m		singlet		IGHV1-69	IGHJ4	﻿CAGGTGCAGCTGGTGCAGTCTGGGGCTGAGGTGAAGAAGCCTGGGTCCTCGGTGAAGGCCTCCTGCAAGGCTTCTGGAGGCACGTTCAGCACCTATACTATCAGCTGGGTGCGACAGGCCCCTGGACACGGGCTTGAGTGGATGGGACGGATCATTCCTATATTTGGTACAACAAAGTACGCACAGAAGTTCCAGGGCAGAGTCACGATTACCGCGGACGAATCCACGACCACAGCCTACCTGGAGCTGAGCAGCCTGAGATCTGAGGACACGGCCGTGTATTACTGTACGATCAACACTCAGTGGGACCTAGTCCCAAGGTGGGGCCAGGGAACCCTGGTCACCGTCTCCTCAG	﻿QVQLVQSGAEVKKPGSSVKASCKASGGTFSTYTISWVRQAPGHGLEWMGRIIPIFGTTKYAQKFQGRVTITADESTTTAYLELSSLRSEDTAVYYCTINTQWDLVPRWGQGTLVTVSS		IGKV3-20	IGKJ2	﻿GAAATTGTGTTGACGCAGTCTCCAGGCACCCTGTCTTTGTCTCCAGGGGAAAGAGCCACCCTCTCCTGCAGGGCCAGTCAGAGTGTTAGCAGCAGCTACTTAGCCTGGTACCAGCAGAAACCTGGCCAGGCTCCCAGGCTCCTCATCTATGGTGCATCCAGCAGGGCCACTGGCATCCCAGACAGGTTCAGTGGCAGTGGGTCTGGGACAGACTTCACTCTCACCATCAGCAGACTGGAGCCTGAAGATTTTGCAGTGTATTACTGTCAGCAGTATGGTAGCTCACTTTACACTTTTGGCCAGGGGACCAAGCTGGAGATCAAAC	﻿EIVLTQSPGTLSLSPGERATLSCRASQSVSSSYLAWYQQKPGQAPRLLIYGASSRATGIPDRFSGSGSGTDFTLTISRLEPEDFAVYYCQQYGSSLYTFGQGTKLEIK		2.2		2.9167	41.6118
			C891		1.3m		singlet		IGHV3-15	IGHJ4	﻿GAGGTGCAGCTGGTGGAGTCTGGGGGAGGCTTGGTAAAGCCTGGGGGGTCCCTTAGACTCTCCTGTGCAGTCTCTGGATTCACTTTCAGTAACGTCTGGATGAGCTGGGTCCGCCAGGCTCCAGGGAAGGGGCTGGAGTGGGTTGGCCGTATTAAAAGCAAAACTGATGGTGGGACAACAGACTACGCTGCACCCGTGAAAGGCAGATTCACCATCTCAAGAGATGATTCAAAAAACACGCTGTATCTGCAAATGAACAGCCTGAAAACCGAGGACACAGCCGTGTATTACTGTACCTCACAGCTATGGTTACGGGGCCCCGGTGACTAC-TGGGGCCAGGGAACCCTGGTCACCGTCTCCTCAG	﻿EVQLVESGGGLVKPGGSLRLSCAVSGFTFSNVWMSWVRQAPGKGLEWVGRIKSKTDGGTTDYAAPVKGRFTISRDDSKNTLYLQMNSLKTEDTAVYYCTSQLWLRGPGDYXGPGNPGHRLL		IGLV6-57	IGLJ3	﻿AATTTTATGCTGACTCAGCCCCACTCTGTGTCGGAGTCTCCGGGGAAGACGGTAACCATCTCCTGCACCGGCAGCAGTGGCAGCATTGCCAGCAACTATGTGCAGTGGTACCAGCAGCGCCCGGGCAGTGCCCCCACCACTGTGATCTATGAGGATAACCAAAGACCCTCTGGGGTCCCTGATCGGTTCTCTGGCTCCATCGACAGCTCCTCCAACTCTGCCTCCCTCACCATCTCTGGACTGAAGACTGAGGACGAGGCTGACTACTACTGTCAGTCTTATGATAGCAGCCTTAATTGGGTGTTCGGCGGAGGGACCAAGCTGACCGTCCTAG	﻿NFMLTQPHSVSESPGKTVTISCTGSSGSIASNYVQWYQQRPGSAPTTVIYEDNQRPSGVPDRFSGSIDSSSNSASLTISGLKTEDEADYYCQSYDSSLNWVFGGGTKLTVL		1.44		>1000	>1000
			C892		12m		singlet		IGHV3-15	IGHJ4	﻿GAGGTGCAGCTGGTGGAGTCTGGGGGAGGCTTGGTGAAGCCTGGGGGGTCCCTTAAAGTCTCCTGTACAGCCTCTGGATTCACTTTCACTGACGCCTGGATGAGCTGGGTCCGCCAGGCTCCAGGGAAGGGGCTGGAGTGGGTTGGCCGTATTAAAAGCAGAGCTTATGGTGGGACGACAGACTACGGTGCACCCGTGCAAGGCAGATTCACCATCTCAAGAGATGATTCAATAAACACTCTTTATCTGCAAATGAACAGCCTGACAGCCGAGGACACAGCCGTTTATTACTGTACCTCACAACTATGGTTACGGGGCCCCGGTGACTACTGGGGCCAGGGAACCCTGGTCACCGTCTCCTCAG	﻿EVQLVESGGGLVKPGGSLKVSCTASGFTFTDAWMSWVRQAPGKGLEWVGRIKSRAYGGTTDYGAPVQGRFTISRDDSINTLYLQMNSLTAEDTAVYYCTSQLWLRGPGDYWGQGTLVTVSS		IGLV6-57	IGLJ3	﻿AATTTTATGCTGACTCAGCCCCACTCTGTGTCGGAGTCTCCGGGGAAGACGGTAACCATCTCCTGCACCGGCAGCAGTGGCAGCATTGCCAGCAACTATGTGCACTGGTACCAGCAGCGCCCGGGCGGTGCCCCCACGACTGTGATCTATGAGGATAACCAAAGACCCTCTGGGGTCCCTGATCGGTTCTCTGGCTCCATCGACATCTCCTCCAACTCTGCCTCCCTCACCATCTCTGGACTGAAGACTGAGGACGAGGGTGACTACTACTGTCAGTCTTATGATAGTGGTGTTAATTGGGTGTTCGGCGGAGGGACCAAGCTGACCGTCCTAG	﻿NFMLTQPHSVSESPGKTVTISCTGSSGSIASNYVHWYQQRPGGAPTTVIYEDNQRPSGVPDRFSGSIDISSNSASLTISGLKTEDEGDYYCQSYDSGVNWVFGGGTKLTVL		2.9		62.7136	>1000
			C893		12m		singlet		IGHV5-51	IGHJ3	﻿GAGGTGCAGCTGGTGCAGTCTGGAGCAGAGGTGAAAAAGCCCGGGGAGTCTCTGAAGATCTCCTGTAAGGGTTCTGGTTACTACTTTACCAGACAGTGGATCGGCTGGGTGCGCCAGATGCCCGGGAAAGGCCTGGAGTGGATGGGGATCATCTATCCTGGTGACTCTGATACCAGATACAGTCCGTCCTTCCAAGGCCAGGTCACCATCTCAGCCGACAAGTCCATCAGCACCGCCTATTTGCAGTGGAGCAGCCTGAAGGCCTCGGACACCGCCATGTATTACTGTGCGAGGGGGGGTTGGGACCCCGCCGAGTATAGCAGTTCCGGGGGCGGGGGTCTCGATGCTTTTGATATCTGGGGCCAAGGGACAATGGTCACCGTCTCTTCAG	﻿EVQLVQSGAEVKKPGESLKISCKGSGYYFTRQWIGWVRQMPGKGLEWMGIIYPGDSDTRYSPSFQGQVTISADKSISTAYLQWSSLKASDTAMYYCARGGWDPAEYSSSGGGGLDAFDIWGQGTMVTVSS		IGKV3-11	IGKJ5	﻿GAAATTGTGTTGACACAGTCTCCAGCCACCCTGTCTTTGTCTCCAGGAGAAAGAGCCACCCTCTCCTGCAGGGCCAGTCAGAGTGTTAGCAGCTACTTAGCCTGGTACCAACAGAGACCTGGCCGGGCTCCCAGGCTCCTCATCTATGATGCATCCAACAGGGCCACTGGCATCCCAGGCAGGTTCAGTGGCAGTGGGTCTGGGACAGACTTCTCTCTCACCATCAGCAGCCTAGAGCCTGAAGATTTTGCAGTTTATTACTGTCAGCAGCGTAGCAGCTGGCCCCTCACCTTCGGCCAAGGGACACGACTGGAGATTAAAC	﻿EIVLTQSPATLSLSPGERATLSCRASQSVSSYLAWYQQRPGRAPRLLIYDASNRATGIPGRFSGSGSGTDFSLTISSLEPEDFAVYYCQQRSSWPLTFGQGTRLEIK		3.73		115.911	>1000
			C894		12m		singlet		IGHV5-10	IGHJ6	﻿GAGGTGCAGCTGGTGCAGTCCGGAGCAGAGGTGAAAAAGCCCGGGGAGTCTCTGAGGATCTCCTGTAAGGGTTCTGGATACAGCTTTACCGGCTACTGGATCAGCTGGGTGCGCCAGATGCCCGGGAAAGGCCTGGAGTGGATGGGGAGAATTGATCCCAGTGACTCTTATACCAACTACAGCCCGTCCTTCGAAGGCCACGTCACCTTCTCAGCTGACACGGCCCTCAGCACCGCCTACCTGCAGTGGAGCAGCCTGCAGGCCTCGGACACCGCCATATATTTCTGTGGGAGAATTGCACCTCCTGGAAGGGGGAGTTATTACCCCACCCAAAACTACATGGACGTCTGGGGCAAAGGGACCACGGTCACCGTCTCCTCA	﻿EVQLVQSGAEVKKPGESLRISCKGSGYSFTGYWISWVRQMPGKGLEWMGRIDPSDSYTNYSPSFEGHVTFSADTALSTAYLQWSSLQASDTAIYFCGRIAPPGRGSYYPTQNYMDVWGKGTTVTVSS		IGKV3-20	IGKJ4	﻿GAAATTGTGTTGACGCAGTCTCCAGGCACCCTGTCTTTGTCTCCAGGGGAAAGAGCCACCCTCTCCTGCACGGCCGATCAGAGTGTTCCCAATAGTTACTTAGCCTGGTACCAACACAAACCTGGCCAGGCTCCCAGGCTCCTCATCTATGGTGCATCCAGCAGGGCCACTGGCATCCCAGACAGGTTCAGTGGCAGTGGGTCTGGCATAGACTTCACTCTCACCATCAGCAGACTGGAGCCTGAAGATTTTGCAGTGTATTACTGTCAGCAGTATGGTAGCTTACTTCTCACTTTCGGCGGAGGGACCAAGGTGGAAATCAAAC	﻿EIVLTQSPGTLSLSPGERATLSCTADQSVPNSYLAWYQHKPGQAPRLLIYGASSRATGIPDRFSGSGSGIDFTLTISRLEPEDFAVYYCQQYGSLLLTFGGGTKVEIK		16.77		97.1106	266.282
			C895		12m		singlet		IGHV1-69	IGHJ6	﻿CAGGTGCAGCTGGTGCAGTCTGGGGCTGAGGTGAAGAAGCCTGGGTCCTCGGTGAAGGTCTCCTGCAAGGCTTCTGGAGGCACCTTCACCAGCTATGCTTTCAGCTGGGTGCGACAGGCCCCTGGACAAGGGCTTGAGTGGATGGGAGGGATTATCCCTATCTTTGGTACAACAAACTACGCACAGAAGTTCCAGGGCAGAGTCACGATTACCGCGGACGAATCCACGAGCACTGCCTACATGGAGCTGAGCAGCCTGAGATCTGAGGACACGGCCGTGTATTACTGTGCGAGACCGGAGGGATGTGGTAGTAGAACCAGCTGCACACCGGGGGCTTATTATTACGGTATGGACGTCTGGGGCCAAGGGACCACGGTCACCGTCTCCTCA	﻿QVQLVQSGAEVKKPGSSVKVSCKASGGTFTSYAFSWVRQAPGQGLEWMGGIIPIFGTTNYAQKFQGRVTITADESTSTAYMELSSLRSEDTAVYYCARPEGCGSRTSCTPGAYYYGMDVWGQGTTVTVSS		IGKV3-11	IGKJ2	﻿GAAATTGTGTTGACACAGTCTCCAGCCACCCTGTCTTTGTCTCCAGGGGAAAGGGCCACCCTCTCCTGCAGGGCCAGTCAGAGTGTTGGCAGCTACTTAGCCTGGTACCAACAGAAACCTGGCCAGGCTCCCAGGCTCCTCATCTATGATGCATCCAACAGGGCCACTGGCATCCCAGCCAGGTTCAGTGGCAGTGGGTCTGGGACAGACTTCACTCTCACCATCAGCAGCCTAGAGCCTGAAGATTTTGCATTTTATTTCTGTCAGCAGCGTAACAGCTGGCCTCCGGAGTACTCTTTTGGCCAGGGGACCAAGCTGGAGATCAAAC	﻿EIVLTQSPATLSLSPGERATLSCRASQSVGSYLAWYQQKPGQAPRLLIYDASNRATGIPARFSGSGSGTDFTLTISSLEPEDFAFYFCQQRNSWPPEYSFGQGTKLEIK		2.21		>1000	>1000
			C896		12m		singlet		IGHV3-30	IGHJ4	﻿CAGGTGCAGCTGGTGGAGTCTGGGGGAGGCGTGGTCCAGCCTGGGAGGTCCCTGAAACTCTCCTGTGCAGCCTCTGGATTCACCTTCAAAACTTATGGCATGCACTGGGTCCGCCAGGCTCCAGGCAAGGGGCTGGAATGGGTGGCAGTTATATCATATGATGGAACTAATGACTACTATGCAGACTCCGTGAAGGGCCGATTCACCGTCTCCAGAGACAACTCCAAGAACACGCTGTATCTGCAAATGAACAGCCCGAGAACTGAAGACACGGCTGTGTATTACTGTGCGAAAGCGGGGGGCCCATATTACTATGATACTAGCGGTTCTTTCTGGTACTTTGACTACTGGGGCCAGGGAACCCTGGTCACCGTCTCCTCAG	﻿QVQLVESGGGVVQPGRSLKLSCAASGFTFKTYGMHWVRQAPGKGLEWVAVISYDGTNDYYADSVKGRFTVSRDNSKNTLYLQMNSPRTEDTAVYYCAKAGGPYYYDTSGSFWYFDYWGQGTLVTVSS		IGKV1-39	IGKJ3	﻿GACATCCAGATGACCCAGTCTCCATCCTCCCTGTCTGCATCTGTAGGAGACAGAGTCACCATCACTTGCCGGGCAAGTCAGACCATTAGTAGCTATTTAAATTGGTATCAACAAAAATCAGGGAAAGCCCCTGAGCTCCTGGTCTATGATGCATCCAACTTGGAAAGTGGGGTCCCATCAAGGTTCAGTGGCAGTGGATCTGGGACAGATTTCACTCTCACCATCAGCAGTCTGCAACCTGAAGATTTTGCAACTTACTACTGTCAACAGAGTTACAGTTTCGGCCCTGGGACCAAAGTGGATATCAAAC	﻿DIQMTQSPSSLSASVGDRVTITCRASQTISSYLNWYQQKSGKAPELLVYDASNLESGVPSRFSGSGSGTDFTLTISSLQPEDFATYYCQQSYSFGPGTKVDIK		4.3		>1000	>1000
			C897		12m		singlet		IGHV3-30	IGHJ4	﻿CAGGTGCAGCTGGTGGAGTCTGGGGGAGGCGTGGTCCAGCCTGGGAGGTCCCTGAGACTTTCCTGTGCAGCCTCTGGATTCATCTTCAGTCACTATGGCATGCACTGGGTCCGCCAGGCTCCAGGCAAGGGGCTGGAATGGGTGGCAGTTATATTATATGATGGAAGCGACCAATACTATGCAGACTCCGTGAAGGGCCGATTCACCATCTCCAGAGACAACTCCAAGAACACGCTGTTTCTGGAAATGAACAGCCTGAGACTTGAGGACACGGCTGTGTATTACTGTGCGAAAGGGGGGGGCCAATATTGTAGTCATGGTAATTGCTACCTTAACTACTTTGACTACTGGGGCCAGGGAGCCCTGGTCACCGTCTCCTCAG	﻿QVQLVESGGGVVQPGRSLRLSCAASGFIFSHYGMHWVRQAPGKGLEWVAVILYDGSDQYYADSVKGRFTISRDNSKNTLFLEMNSLRLEDTAVYYCAKGGGQYCSHGNCYLNYFDYWGQGALVTVSS		IGKV1-33	IGKJ3	﻿GACATCCAGATGACCCAGTCTCCATCCTCCCTGTCTGCATCTGTAGGAGACAGAGTCACGATCACTTGCCAGGCGAGTCAGGACATTAGAGATAATTTAAATTGGTATCAGCAGAAACCAGGGAAAGCCCCTCAGCTCCTGATCTACGATGCATCCAATTTGCAACCAGGGGTCCCATCAAGGTTCAGTGGAAGTGGATCTGGGACACATTTTACTTTCACCATCAGCAGACTGCAGCCTGAAGATATTGCAACATATTTCTGTCAACAGTATGCTAATCTCCCTACCACTTTCGGCCCTGGGACCAAAGTGGATATCAAAC	﻿DIQMTQSPSSLSASVGDRVTITCQASQDIRDNLNWYQQKPGKAPQLLIYDASNLQPGVPSRFSGSGSGTHFTFTISRLQPEDIATYFCQQYANLPTTFGPGTKVDIK		1.88		>1000	>1000
			C898		12m		singlet		IGHV1-69	IGHJ4	﻿CAGGTGCAGCTGGTGCAGTCTGGGGCTGAGGTGAAGAAGCCTGGGTCCTCGGTGAAGGTCTCCTGCAAGGCTTCTGGAGGCCCCTTCAGCAGCTATGCCTTCACCTGGGTGCGACAGGCCCCTGGACAAGGGCTTGAGTGGATGGGAGGGATCATCGCTACCTTTGGTACAGTAAACTACGCACAGAAGTTCCAGGGCAGAGTCACGATTACCGCGGACGAATTCACGAGTACAGTCAACATGGAGCTGAGCAGCCTGAGATCTGACGACACGGCCGTGTATTACTGTGCGCGGAGGGATTGTAGTACTACGAGCTGTTATGATGAGGTGCTTTATCGGCTAGTTGACTGGGGTCAGGGAACCCTGGTCACCGTCTCCTCAG	﻿QVQLVQSGAEVKKPGSSVKVSCKASGGPFSSYAFTWVRQAPGQGLEWMGGIIATFGTVNYAQKFQGRVTITADEFTSTVNMELSSLRSDDTAVYYCARRDCSTTSCYDEVLYRLVDWGQGTLVTVSS		IGKV3-20	IGKJ1	﻿GAAATTGTGTTGACGCAGTCTCCAGGCACCCTGTCTTTGTCTCCAGGGGAAAGAGCCACCCTCTCTTGCAGGGCCAGTCAGAGTGTTAACAGCGATTACTTAGCCTGGTATAAGCAGAAACCTGGCCAGGCTCCCAGGCTCCTCATCTATGGTACATCCAGCAGGGCCACTGGCATCCCAGACAGGTTCAGTGGCAGTGGGTCTGGGACAGACTTCACTCTCACCATCAGCAGACTGGAGCCTGATGATTTTGCAGTGTATTACTGTCAACAGTATGGTAACTCACCTCGGACGTTCGGCCAAGGGACCAAGGTGGAAATCAAAC	﻿EIVLTQSPGTLSLSPGERATLSCRASQSVNSDYLAWYKQKPGQAPRLLIYGTSSRATGIPDRFSGSGSGTDFTLTISRLEPDDFAVYYCQQYGNSPRTFGQGTKVEIK		7.6		>1000	>1000
			C899		12m		singlet		IGHV3-15	IGHJ4	﻿GAGGTGCAGCTGGTGGAGTCCGGGGGAGGCTTGGTAAAGCCTGGGGGGTCCCTTAGACTCTCCTGTGCAGCCTCTGGATTCACTTTCAGTAACGCCTGGATGAGCTGGGTCCGCCAGGCCCCAGGGAAGGGGCTGGAGTGGGTTGGCCGTATTAAAAGCAAAACTGATGCTGAGACGACAGACTACGCTGCACCCGTGAGAGGCAGATTCACCATCTCAAGAGATAATTCAAAAAATACACTATATTTGGAAATGAACAGCCTGAAAACCGAGGACACAGCCGTGTATTATTGTACCACAGATGCCGATTACTCTGATAGTAGTGGTTATTACGTGACCTACTACTTTGAATACTGGGGCCAGGGATCCCTGGTCACCGTCTCCTCAG	﻿EVQLVESGGGLVKPGGSLRLSCAASGFTFSNAWMSWVRQAPGKGLEWVGRIKSKTDAETTDYAAPVRGRFTISRDNSKNTLYLEMNSLKTEDTAVYYCTTDADYSDSSGYYVTYYFEYWGQGSLVTVSS		IGLV2-11	IGLJ3	﻿CAGTCTGCCCTGACTCAGCCTCGCTCAGTGTCCGGGTCTCCTGGACAGTCAGTCACCATCTCCTGCACTGGAAGCAACAGTGATGTTGGTGGTTATAACTATGTCTCCTGGTACCAACAACACCCCGGCAAAGCCCCCAAACTCGTGATTTATGATGTTAGTTTGCGACCCTCTGGGGTCCCTGATCGCTTCTCTGGTTCCAAGTCTGGCATCACGGCCTCCCTGACCATCTCTGGGCTCCAGCCTGAGGATGAGGCTCATTATTACTGCTGCTCATTTGCAGGCACCTACACTCCCTGGGTGTTCGGCGGAGGGACCAGGCTGACCGTCCTAG	﻿QSALTQPRSVSGSPGQSVTISCTGSNSDVGGYNYVSWYQQHPGKAPKLVIYDVSLRPSGVPDRFSGSKSGITASLTISGLQPEDEAHYYCCSFAGTYTPWVFGGGTRLTVL		2.23		7.93197	42.8971
			C900		12m		singlet		IGHV4-4	IGHJ4	﻿CAGGTGCAGCTGCAGGAGTCGGGCCCGGGACTGGTGAAGCCATCGGGGACCCTGTCGCTCACCTGCACTGTCTCTGGTGGCTCCATCAACAGTAGAAACTGGTGGAGTTGGGTCCGCCAGCCCCCAGGGAAGGGTCTGGAGTGGATTGGGGAAATCTTTCATAGTGGGAGCACCAACTACAACCCGTCCCTCGAGAGTCGAGTCGCCATATCCATAGACAAGTCCCACAACCACTTCTCCCTGAAGCTGACCTCTGTGACCGCCGCGGACACGGCCGTGTATTATTGTGCGAGGGCTAATGGTATACTTGACTTCTGGGGCCAGGGAACCCTGGTCACCGTCTCCTCAG	﻿QVQLQESGPGLVKPSGTLSLTCTVSGGSINSRNWWSWVRQPPGKGLEWIGEIFHSGSTNYNPSLESRVAISIDKSHNHFSLKLTSVTAADTAVYYCARANGILDFWGQGTLVTVSS		IGKV1-NL1	IGKJ1	﻿GACATCCAGATGACCCAGTCTCCATCCTCCCTGTCTGCATCTGTAGGAGACAGAGTCACCATCACTTGCCGGGCGAGTCAGGGCATTAGTAATTCTTTAGCCTGGTATCAGCTGAAACCAGGGAAAGCCCCTAAGCTCCTGCTCTATGCTGCATCCACATTGGAAAGTGGGGTCCCATCCAGGTTCAGTGGCAGTGGATCTGGGACGAATTTCACTCTCACCATCAGCAGCCTGCAGCCTGAAGATTTTGCATCCTATTGCTGTCAACATTATTATAGCAGCCCTCGGACGTTCGGCCAAGGGACCAAGGTGGAAATCAA	﻿DIQMTQSPSSLSASVGDRVTITCRASQGISNSLAWYQLKPGKAPKLLLYAASTLESGVPSRFSGSGSGTNFTLTISSLQPEDFASYCCQHYYSSPRTFGQGTKVEI		2.54		13.6214	70.0133
			C901		12m		singlet		IGHV3-30	IGHJ6	﻿CAGGTGCAGCTGGTGGAGTCTGGGGGAGGCGTGGTCCAGCCTGGGAGGTCCCTGAGAATTGCCTGTGGAGCCTCTGGATTCACGTTCAGTACTTATGACATGCACTGGGTCCGCCAGGCTCCAGTCAAGGGGCTGGAGTGGGTGGCAGTTATATCACGTGATGGAAGTGGTAAATTCTATGCAGACTCCGTGAAGGGCCGATTCACCATCTCCAGAGACAATTCCAAGAAGACGCTGTATCTGCAAATGGACAGTCTGAGACCTGAGGACACGGCTATGTATTATTGTGCGAGAGATTTTGAGAGTAGAACCTGGGACCCCCCCAAATACTATTACGCTTTGGACGTCTGGGGCCAAGGGACCACGGTCACCGTCTCCTCA	﻿QVQLVESGGGVVQPGRSLRIACGASGFTFSTYDMHWVRQAPVKGLEWVAVISRDGSGKFYADSVKGRFTISRDNSKKTLYLQMDSLRPEDTAMYYCARDFESRTWDPPKYYYALDVWGQGTTVTVSS		IGKV1-39	IGKJ1	﻿GACATCCAGATGACCCAGTCTCCATCCTCCCTGTCTGCATCTGTAGGAGACAGAGTCACCATCACTTGCCGGGCAAGTCAGAGCATTAGCACCTATTTAAATTGGTATCAGCAGAAACCAGGGAAAGCCCCTAGCCTCCTCATCTATGCTGCATCCAGTTTATATAGTGGGGTCCCATCAAGGTTCAGTGGCAGTGGATCTGGGACAGATTTCAGTCTCACCATCAGCAGTCTGCAACCTGAAGATTTTGCAACTTACTACTGTCAACAGACTTACACTACCCCCACGTGGACGTTCGGCCAAGGGACCAAGGTGGAAATCAAAC	﻿DIQMTQSPSSLSASVGDRVTITCRASQSISTYLNWYQQKPGKAPSLLIYAASSLYSGVPSRFSGSGSGTDFSLTISSLQPEDFATYYCQQTYTTPTWTFGQGTKVEIK		2.16		358.702	>1000
			C902		12m		singlet		IGHV5-10	IGHJ5	﻿GAGGTGCAGCTGGTGCAGTCCGGAGCAGAGGTGAAAAAGCCCGGGGAGTCTCTGAGGATCTCCTGCAAGGGCTCTGGATACAGCTTTCACACCTACTGGATCCACTGGGTGCGCCAGATGCCCGGGAAAGGCCTGGAGTGGATGGGGAAGATTGATCCTAGTGACTCTTATACCAACTACAGCCCATCCTTCCAAGGCCACGTCACCTTCTCAGCTGACAGGTCCATCAGCACTGCCTACTTGCAGTGGAGCAGCCTGAAGGCCTCGGACACCGCCACATACTATTGTGCGAGACTTTCCTGGAGTCCCCCCACCAGAACCACCGACGAAAAAAACTGGTTCGACCCCTGGGGCCAGGGAACCCTGGTCACCGTCTCCTCAG	﻿EVQLVQSGAEVKKPGESLRISCKGSGYSFHTYWIHWVRQMPGKGLEWMGKIDPSDSYTNYSPSFQGHVTFSADRSISTAYLQWSSLKASDTATYYCARLSWSPPTRTTDEKNWFDPWGQGTLVTVSS		IGKV1-9	IGKJ4	﻿GACATCCAGTTGACCCAGTCTCCATCCTTCCTGGCTGCATCTGCAGGAGACAGAGTCACCATCACTTGCCGGGCCAGTCAGGGCATTAGCAGTTATTTAGCCTGGTATCAGCAAAAACCGGGGAAAGCCCCTAAGGTCCTGATCTATGCTGCATCCACTTTGCAAAGTGGGGTCCCATCAAGGTTCAGCGGCAGTGGATCTGGGACAGAATTCACTCTCACAATCAGCAGCCTGCAGCCTGAAGATTGTGCAACTTATTACTGTCAACAGTTTAATAGTGACCCTCTCACTTTCGGCGGAGGGACCAAGGTGGAGATCAAAC	﻿DIQLTQSPSFLAASAGDRVTITCRASQGISSYLAWYQQKPGKAPKVLIYAASTLQSGVPSRFSGSGSGTEFTLTISSLQPEDCATYYCQQFNSDPLTFGGGTKVEIK		3.39		8.76996	49.5166
	COV57		C952		12m		clone		IGHV5-51	IGHJ2	﻿GAGGTGCAGCTGGTGCAGTCTGGAGCAGAGGTGAAAAAGCCCGGGGAATCTCTGACGATCTCCTGTAAGGATTCTGGAAACAGTTTTACCATCTACTGGATCGGCTGGGTGCGCCAGATGCCCGGGAAAGGCCTGGAGTGGATGGGGATGATCTATCCTGGTGACTCTGGTACCAGATACAGCCCGTCCTTCGAAGGCCAAGTCACCATCTCAGCCGACGAGTCCATCAACACCGCCTACCTGCAGTGGCGCAGCCTGAAGGCCTCGGACACCGCCATGTATTACTGTGTGAGAGGTATAGCAGTGGACTGGTACTTCGATCTCTGGGGCCGTGGCACCCTGGTCACCGTCTCCTCAG	﻿EVQLVQSGAEVKKPGESLTISCKDSGNSFTIYWIGWVRQMPGKGLEWMGMIYPGDSGTRYSPSFEGQVTISADESINTAYLQWRSLKASDTAMYYCVRGIAVDWYFDLWGRGTLVTVSS		IGLV1-40	IGLJ1	﻿CAGTCTGTGCTGACTCAGCCGCCCTCAGTGTCTGGGGCCCCAGGGCAGAGGGTCACCATCTCCTGCACTGGGAGCAGCTCCAACATCGGGGCAGGTTTTGATGTTCACTGGTACCAGCAGCTTCCAGGAACAGCCCCCAAACTCCTCATCTATGGTAACAACAATCGGCCCTCAGGGGTCCCTGACCGATTCTCTGGCTCCAAGTCTGCCACCTCAGCCTCCCTGGCCATCACTGGGCTCCAGGCTGAGGATGAGGCTGATTATTACTGCCAGTCCTCTGACAGCAGCCTGAGTGGCCTTTATGTCTTCGGAACTGGGACCAACGTAATCGTCCT	﻿QSVLTQPPSVSGAPGQRVTISCTGSSSNIGAGFDVHWYQQLPGTAPKLLIYGNNNRPSGVPDRFSGSKSATSASLAITGLQAEDEADYYCQSSDSSLSGLYVFGTGTNVIV		2.4		7.66122	32.2028
			C953		1.3m		clone		IGHV1-69	IGHJ6	﻿CAGGTGCAGCTGGTGCAGTCTGGGGCTGAGGTGAAGAAGCCTGGGTCCTCGGTGAAGGTCTCCTGCAAGGCTTCTGGAGGCACCTTCAGCAGCTATGCTATCAGCTGGGTGCGACAGGCCCCTGGACAAGGGCTTGAGTGGATGGGAAGGATCATCCCTATCCTTGGTATAGCAAACTACGCACAGAAGTTCCAGGGCAGAGTCACGATTACCGCGGACAAATCCACGAGCACAGCCTACATGGAGCTGAGCAGCCTGAGATCTGAGGACACGGCCGTGTATTACTGTGCGAGAGATTCCGAGTATAGCAGCAGCTGGTACTCACGGGGCTACTACGGTATGGACGTCTGGGGCCAAGGGACCACGGTCACCGTCTCCTCA	﻿QVQLVQSGAEVKKPGSSVKVSCKASGGTFSSYAISWVRQAPGQGLEWMGRIIPILGIANYAQKFQGRVTITADKSTSTAYMELSSLRSEDTAVYYCARDSEYSSSWYSRGYYGMDVWGQGTTVTVSS		IGKV2-28	IGKJ4	﻿GATATTGTGATGACTCAGTCTCCACTCTCCCTGCCCGTCACCCCTGGAGAGCCGGCCTCCATCTCCTGCAGGTCTAGTCAGAGCCTCCTGCATAGTAATGGATACAACTATTTGGATTGGTACCTGCAGAAGCCAGGGCAGTCTCCACAGCTCCTGATCTATTTGGGTTCTAATCGGGCCTCCGGGGTCCCTGACAGGTTCAGTGGCAGTGGATCAGGCACAGATTTTACACTGAAAATCAGCAGAGTGGAGGCTGAGGATGTTGGGGTTTATTACTGCATGCAAGCTCTACAAACTCCTCCCACTTTCGGCGGAGGGACCAAGGTGGAAATCAAAC	﻿DIVMTQSPLSLPVTPGEPASISCRSSQSLLHSNGYNYLDWYLQKPGQSPQLLIYLGSNRASGVPDRFSGSGSGTDFTLKISRVEAEDVGVYYCMQALQTPPTFGGGTKVEIK		4.09		>1000	>1000
			C954		12m		singlet		IGHV1-69	IGHJ6	﻿CAGGTGCAGCTGGTGCAGTCTGGGGCTGAGGTGAAGAAGCCTGGGTCCTCGGTGAAGGTCTCCTGCAAGGCTTCTGGGGACACGTTCACCAATTATGCTTTCAGCTGGATGCGACAGGCCCCTGGACAAGGGCTTGAGTGGATGGGAAGGATCATCCCTATTCTTGGAATAGTAAAGTATTCACAGAAGTTCCAGGACAGGGTCAGGATTAGTGCGGACAAATCCACGAGCACAGCCTACATGGACCTGAGCAGCCTGAGATCTGAGGACACGGCCATGTATTACTGTGCGAGAGATTCCGAATTCAGTACCAGCTGGTTCTCACGGGGCTACCACGGTATGGACGTCTGGGGCCAAGGGACCACGGTCACCGTCTCCTCA	﻿QVQLVQSGAEVKKPGSSVKVSCKASGDTFTNYAFSWMRQAPGQGLEWMGRIIPILGIVKYSQKFQDRVRISADKSTSTAYMDLSSLRSEDTAMYYCARDSEFSTSWFSRGYHGMDVWGQGTTVTVSS		IGKV2-28	IGKJ4	﻿GATATTGTGATGACTCAGTCTCCACTCTCCCTGCCCGTCACCCCTGGAGAGCCGGCCTCCATCTCCTGCAGGTCTAGTCAGAGCCTCCTGCATGGTGATGGATACAACTATTTGGATTGGTACCTGCAGAAGCCAGGGCAGTCTCCACACCTCCTGATCTATTTGGGTTCTAATCGGACCTCCGGGGTCTCTGACAGGTTCAGTGGCAGTGGATCAGGCACAGATTTTACACTGAAAATCAGCAGAGTGGAGGCTGAGGATGTTGGGGTCTATTACTGCATGCAAGCTCTACAAACTCCTCCCACTTTCGGCGGAGGGACCAAGGTGGAAATCAAAC	﻿DIVMTQSPLSLPVTPGEPASISCRSSQSLLHGDGYNYLDWYLQKPGQSPHLLIYLGSNRTSGVSDRFSGSGSGTDFTLKISRVEAEDVGVYYCMQALQTPPTFGGGTKVEIK		1.48		10.9348	33.0519
			C955		12m		clone		IGHV4-34	IGHJ4	﻿CAGGTGCAGCTACAGCAGTGGGGCGCAGGACTGTTGAAGCCTTCGGAGACCCTGTCCCTCACCTGCGCTGTCTATGGTGGGACCTTCAGTGGTTACTCCTGGACCTGGATCCGCCAGCCCCCAGGGAAGGGGCTGGATTGGATTGGGGAAATCAATCATAGTGGAAGCACCAATTATAACCCGTCCCTCAAGAGTCGAGTCACCATATCCGTAGACACGTCCAAGAATCAGTTCTCCCTGAAGCTGAGCTCTGTGACCGCCGCGGACACGGCTGTGTATTACTGTGCGAGAGCTGGTTTTGGATTCGTTATCACTTCTCGTTCAGGAACGGATCCCCTTTTTGACTACTGGGGCCAGGGAACCCTGGTCACCGTCTCCTCAG	﻿QVQLQQWGAGLLKPSETLSLTCAVYGGTFSGYSWTWIRQPPGKGLDWIGEINHSGSTNYNPSLKSRVTISVDTSKNQFSLKLSSVTAADTAVYYCARAGFGFVITSRSGTDPLFDYWGQGTLVTVSS		IGLV1-40	IGLJ3	﻿CAGTCTGTGCTGACTCAGCCGCCCTCAGTGTCTGGGGCCCCAGGGCAGAGGGTCACCATCTCCTGCACTGGGAGCAGCTCCAACATCGGGGCAGGTTATGATGTTCACTGGTACCAGCAGCTTCCAGGAACAGCCCCCAAAGTCCTCATCTATGGTAACAACAATCGGCCCTCAGGGGTCCCTGACCGATTCTCTGGCTCCAAGTCTGGCACCTCAGCCTCCCTGGCCATCACTGGGCTCCAGGCTGAGGATGAGGCTGATTATTACTGCCAGTCCTATGACACCAGCCTGAGTGGTTCGAGGGTGTTCGGCGGAGGGACCAAGCTGACCGTCCTAG	﻿QSVLTQPPSVSGAPGQRVTISCTGSSSNIGAGYDVHWYQQLPGTAPKVLIYGNNNRPSGVPDRFSGSKSGTSASLAITGLQAEDEADYYCQSYDTSLSGSRVFGGGTKLTVL		2.44		2.75802	35.2664
			C956		6.2m		singlet		IGHV3-49	IGHJ4	﻿GAGGTGCAGCTGGTGGAGTCTGGGGGAGGCTTGGTACAGCCAGGGCGGTCCCTGAGACTCTCCTGTACAGGTTCTGAATTCACCTTTGGTGATTTTTCTATGAGCTGGTTCCGCCAGGCTCCAGGGAAGGGGCTGGAGTGGGTAGGTTTCATTAGAAGGAAAGCTGATGGTGGGACAACAGAATACGCCGCGTCTGTGAGAGGCAGATTCACCATCTCAAGAGATGATTCCAAAAGCATCGCCTATCTTGTAATGAACAGCCTGAAAAGCGAGGACACAGCCGTGTATTACTGTACTAGAGCGTGGATCCCGACGCCCCATGACTACTGGGGCCAGGGAGTGCTGGTCACCGTCTCCTCAG	﻿EVQLVESGGGLVQPGRSLRLSCTGSEFTFGDFSMSWFRQAPGKGLEWVGFIRRKADGGTTEYAASVRGRFTISRDDSKSIAYLVMNSLKSEDTAVYYCTRAWIPTPHDYWGQGVLVTVSS		IGLV1-44	IGLJ3	﻿CAGTCTGTGCTGACGCAGCCACCCTCAGCGTCTGGGACCCCCGGGCAGAGGGTCACCATCTCTTGTTCTGGAAGCAGCTCCAACATCGGAAGTAATCCTGTAAACTGGTACCAGCAGCTCCCAGGAACGGCCCCCAAACTCCTCATCTATAGTAATAATCGGCGGCCCTCAGGGGTCCCTGACCGATTCTCTGGCTCCAAGTCTGGCGCCTCAGCCTCCCTGGCCATAAGTGGGCTCCAGTCTGAGGATGAGGCTGCTTATTACTGTGCAGCATGGGATGACAGCCGGAAAGGTCCCGTGTTCGGCGGAGGGACCAAGCTGACCGTCCT	﻿QSVLTQPPSASGTPGQRVTISCSGSSSNIGSNPVNWYQQLPGTAPKLLIYSNNRRPSGVPDRFSGSKSGASASLAISGLQSEDEAAYYCAAWDDSRKGPVFGGGTKLTV		1.58		17.7637	67.5683
			C957		12m		clone		IGHV3-49	IGHJ4	﻿GAGGTGCAGCTGGTGGAGTCTGGGGGCGGCTTGGTACAGCCAGGGCGGTCCCTGAGACTCTCCTGTACAGCTTCTGGATTCACCTTTGCTGATTTTTCTATGACCTGGTTCCGCCAGGCTCCAGGAAAGGGGCTGGAGTGGGTAGGTTTCATTAGAAGAGAAGCTGATGGTGGGACAACAGAATACGCCGCATCTGTGAGAGGCAGATTCACCATCTCAAGAGATGATTCCAAAGGCATCGCCTATCTTCTAATGAACAGCCTGAAGAGCGAGGACACAGCCATGTACTACTGTTCTAGAGCGTGGATCCCGACGCCCCATGACTACTGGGGCCAGGGAACGCTGGTCACCGTCTCCTCAG	﻿EVQLVESGGGLVQPGRSLRLSCTASGFTFADFSMTWFRQAPGKGLEWVGFIRREADGGTTEYAASVRGRFTISRDDSKGIAYLLMNSLKSEDTAMYYCSRAWIPTPHDYWGQGTLVTVSS		IGLV1-44	IGLJ3	﻿CAGTCTGTGCTGACGCAGCCACCCTCAGCGTCTGGGACCCCCGGGCAGAGGGTCACCATCTCTTGTTCTGGAGGCAGCTCCAACATCGGAAGTAATCCTGTAAACTGGTACCAGCAGCTCCCAGGAACGGCCCCCAAACTCCTCATCTATAGTAATAATCAGCGGCCCTCAGGGGTCCCTGACCGATTCTCTGGCTCCAAGTCTGGCGCCTCAGCCTCCCTGGCCATCAGTGGGCTCCAGTCTGAGGATGAGGCTGATTATTACTGTGCAGCTTGGGATGACAGCCTGAAGGGTCCCGTGTTCGGCGGAGGGACCAAGGTGACCGTCCT	﻿QSVLTQPPSASGTPGQRVTISCSGGSSNIGSNPVNWYQQLPGTAPKLLIYSNNQRPSGVPDRFSGSKSGASASLAISGLQSEDEADYYCAAWDDSLKGPVFGGGTKVTV		1.93		16.4437	60.0297
			C958		12m		clone		IGHV5-51	IGHJ4	﻿GAGGTGCAGCTGGTGCAGTCTGGAGCAGAGGTGAAAAAGCCGGGGGATTCTCTGAAGATCTCCTGTAAGGGGTCCGGATACAGTTTTATTAGTCACTGGATCGCCTGGGTGCGCCAGAAGCCCGGGAAAGGCCTAGAGTGGATGGGGATCATCCACCCGGGCGACTCTGATACCAGATACAGCCCGTCCATCCAAGGCCAGGTCACCATCTCAGCCGACAGATTCATCACCACCGCCTACCTGCAGTGGAGCAGCCTGCAGGCCTCGGACACTGCCATGTATTACTGTGCGAGACGGGGCAGCAGCTGGGAAATTGATCACTGGGGCCAGGGAACCCTGGTCACCGTCTCCTCAG	﻿EVQLVQSGAEVKKPGDSLKISCKGSGYSFISHWIAWVRQKPGKGLEWMGIIHPGDSDTRYSPSIQGQVTISADRFITTAYLQWSSLQASDTAMYYCARRGSSWEIDHWGQGTLVTVSS		IGLV1-44	IGLJ3	﻿CAGTCTGTGCTGACGCAGCCACCCTCAGCGTCTGGGACCCCCGGGCAGAGGGTCACCATCTCTTGTTCTGGAAGCAGCTCCAACATCGGAAGTTATACTGTGAACTGGTACCACCAGGTCCCAGGAACGGCCCCCAAAGTCCTCATCTATGGTAATACTCAGCGGCCCTCAGGGGTCCCTGACCGATTCTCTGGCTCCAAGTCTGGCACCTCAGCCTCCCTGGCCATCAGTGGGCTCCAGTCTGAGGATGAGGGTGATTATTACTGTGCAGCATGGGATGACAGTCTGGATGGTTGGATGTTCGGCGGGGGGACCACGCTGACCGTCCTA	﻿QSVLTQPPSASGTPGQRVTISCSGSSSNIGSYTVNWYHQVPGTAPKVLIYGNTQRPSGVPDRFSGSKSGTSASLAISGLQSEDEGDYYCAAWDDSLDGWMFGGGTTLTVL		4.02		379.009	>1000
			C959		12m		singlet		IGHV4-59	IGHJ5	﻿CAGGTGCAGCTGCAGGAGTCGGGCCCAGGACTGGTGAAGCCTTCGGAGACCCTGTCCCTCAATTGCAATGTCTCTGGTGGCTCCATCAGCAATTACTACTGGAGCTGGATTCGGCAGCCCCCAGGGAAGGGACTGGAGTGGATTGGCTTTATCTCTTACAGTGGGAGCACCGACTACAACCCCTCCCTCAAGAGTCGAGTCATCATATCAATAGACACGTCCAAGAAGCACTTCTCCCTGAACCTGAGCTCTGTGACCGCCGCAGACACGGCCGTGTATTTCTGTGCAAGACATTACGATATTTTGACTGCCCTGAGTTGGTTCGACCCCTGGGGCCAGGGAACCCTGGTCACCGTCTCCTCAG	﻿QVQLQESGPGLVKPSETLSLNCNVSGGSISNYYWSWIRQPPGKGLEWIGFISYSGSTDYNPSLKSRVIISIDTSKKHFSLNLSSVTAADTAVYFCARHYDILTALSWFDPWGQGTLVTVSS		IGLV1-51	IGLJ3	﻿CAGTCTGTGCTGACTCAGCCGCCCTCAGTGTCTGCGGCCCCAGGACAGACGGTCACCATCTCCTGCTCTGGAAGCAGCTCCAACATTCGGAATAATTTTGTATCCTGGTATCAGCAGTTCCCAGGGACAGCCCCCAAACTCCTCATTTATGACAATAATAAGCGCCCCTCAGGGATTCCTGACCGATTCTCTGGCTCCAAGTCTGGCACGTCAGCCACCCTGGGCATCACCGGACTCCAGACTGGGGACGAGGCCGATTATTACTGCGGAACATGGGATAGCAGCCCGAGTGCCTGTTGGGTGTTCGGCGCAGGGACCAAACTGACCGTC	﻿QSVLTQPPSVSAAPGQTVTISCSGSSSNIRNNFVSWYQQFPGTAPKLLIYDNNKRPSGIPDRFSGSKSGTSATLGITGLQTGDEADYYCGTWDSSPSACWVFGAGTKLTV		4.58		10.1497	51.7376
			C960		12m		singlet		IGHV3-30	IGHJ4	﻿CAGGTGCAGCTGGTGGAGTCTGGGGGAGGCGTGGTCCAGCCTGGGAGGTCCCTGACACTCTCCTGCACAGCCTCTGGATTCACCTTCAATAGATTTGCAATGTTCTGGGTCCGCCAGGCTCCAGGCAAGGGGCTGGAATGGGTGGCAGTTATATCATTTGATGGAAGTTATGAACACTATGCAGAGTCCGTGAAGGGCCGATTCGCCATCTTCAGAGACAACCCCAAGAACACACTGTATCTACAGATGAACAGCCTGAGAGCCGAGGACACGGCTGTCTACTACTGTGCGAAAAGCCCGATAAATTACTGCGCTAATGGTGTGTGCTATCCTGACTCCTGGGGCCAGGGAACCCTGGTCACCGTCTCCTCAG	﻿QVQLVESGGGVVQPGRSLTLSCTASGFTFNRFAMFWVRQAPGKGLEWVAVISFDGSYEHYAESVKGRFAIFRDNPKNTLYLQMNSLRAEDTAVYYCAKSPINYCANGVCYPDSWGQGTLVTVSS		IGLV6-57	IGLJ3	﻿AATTTTATGCTGACTCAGCCCCACTCTGTGTCGGAGTCTCCGGGGAAGACGGTTACCATCTCCTGCACCGGCAGCAGTGGCAGCATTGCCAACAACTATGTGCAGTGGTACCAGCAGCGCCCGGGCAGTGCCCCCACCACTGTGATCTTTGAAGATACCCAAAGACCCTCTGGGGTCCCTGATCGATTCTCTGGCTCCATCGACAGCTCCTCCAATTCTGCCTCCCTCAATATCTCTGGACTGAAGCCTGAGGACGAGGCTGACTATTACTGTCAGTCTTTTGATGTCAACAGTCGTTGGGTGTTCGGCGGAGGGACCAAGCTGACCGTCCTA	﻿NFMLTQPHSVSESPGKTVTISCTGSSGSIANNYVQWYQQRPGSAPTTVIFEDTQRPSGVPDRFSGSIDSSSNSASLNISGLKPEDEADYYCQSFDVNSRWVFGGGTKLTVL		1.62		127.01	>1000
			C961		6.2m		singlet		IGHV3-66	IGHJ6	﻿GAGGTGCAGCTGGTGGAGTCTGGGGGAGGCTTGGTCCAGCCGGGGGGGTCCCTGAGACTCTCCTGTGCAGCCTCTGGAATCATCGTCAGTAACAACTACATGAGCTGGGTCCGCCAGGCTCCAGGGAAGGGCCTGGAATGGGTCTCAACTATTTTTAGCGGTGGGAGCACATACTACGCAGACTCCGTGAAGGACAGATTCACCATCTCCAGAGACAATTCCAATAACACACTGTATCTTCAAATGAACAGCCTGAGACCCGAGGACACGGCCGTGTATTACTGTACGAGATTGGGGGGCTACCGATACGGCATGGACGTCTGGGGCCAAGGGACCACGGTCACCGTCTCCTC	﻿EVQLVESGGGLVQPGGSLRLSCAASGIIVSNNYMSWVRQAPGKGLEWVSTIFSGGSTYYADSVKDRFTISRDNSNNTLYLQMNSLRPEDTAVYYCTRLGGYRYGMDVWGQGTTVTVS		IGKV1-33	IGKJ2	﻿GACATCCAGATGACCCAGTCTCCATCCTCCCTGTCTGCATCTGTAGGAGACAGAGTCACCATCACTTGCCAGGCGAGTCAGGACATTAGCAAATATTTAAATTGGTATCAACAGAAACCAGGGACAGCCCCTAAACTCCTGATCTACGATGCATCCGAATTGGAAAGAGGGGTCCCATCAAGATTCAGTGGAAGTGGATCTGGGACAGATTTTACTTTCACCATCATCAGCCTGCAGCCTGAAGATATTGCAACATATTACTGTCTACAGTATGATAATCTCCCGTACACTTTTGGCCAGGGGACCAAGCTGGAGATCAAAC	﻿DIQMTQSPSSLSASVGDRVTITCQASQDISKYLNWYQQKPGTAPKLLIYDASELERGVPSRFSGSGSGTDFTFTIISLQPEDIATYYCLQYDNLPYTFGQGTKLEIK		2.57		19.2205	59.5578
			C962		12m		clone		IGHV3-66	IGHJ6	﻿GAGGTGCAGCTGGTGGAGTCTGGGGGAGGCTTGGTCCAGCCGGGGGGGTCCCTGAGACTCTCCTGTACAGCCTCTAGATTGACCGTCAGTAGCAACTACATGAACTGGGTCCGCCAGGCTCCAGGGAAGGGGCTGGAGTGGGTCTCAGTTATTTATGCCGGTGGTAGCACATTCTACGCAGACTCCGTGAAGGACAGATTCACCATCTCCAGAGACAATTCCATGAACACGCTATATCTTCAAATGAACAGCCTGAGAGTCGAGGACACGGCTGTGTACTACTGTGCGAGACTGGGGGGCTACCGATACGGAATGGACGTCTGGGGCCAGGGGACCACGGTCACCGTCTC	﻿EVQLVESGGGLVQPGGSLRLSCTASRLTVSSNYMNWVRQAPGKGLEWVSVIYAGGSTFYADSVKDRFTISRDNSMNTLYLQMNSLRVEDTAVYYCARLGGYRYGMDVWGQGTTVTV		IGKV1-33	IGKJ2	﻿GACATCCAGATGACCCAGTCTCCATCTTCCCTGTCTGCATCTGTAGGAGACAGAGTCACCATCACTTGCCAGGCGAGTCAGGACATTAGCAACTATTTAAATTGGTATCAACAGTCACCAGGGAAAGCCCCTAAGCTCCTGATCTACGATGCGTCGAAATTGGAAACAGGGGTCCCATCAAGGTTCAGTGGAAGTGGATCTGGAACAGATTTTACTTTCACCATCAGCAGCCTGCAGCCTGAAGATATTGCAACATATTACTGTCTACAGTATGATAATCTCCCGTACAGTTTTGGCCAGGGGACCAAGCTGGAGATCAA	﻿DIQMTQSPSSLSASVGDRVTITCQASQDISNYLNWYQQSPGKAPKLLIYDASKLETGVPSRFSGSGSGTDFTFTISSLQPEDIATYYCLQYDNLPYSFGQGTKLEI		1.74		12.9302	87.5992
			C963		12m		clone		IGHV1-69	IGHJ2	﻿CAGGTGCAGCTGGTGCAGTCTGGGGCTGAGGTGAAGAAGCCTGGGTCCTCGGTGAGGGTCTCTTGCAAGGCTTCTGGAGGCACCTTCAGCAGTTTTACTATCACCTGGGTGCGACAGGCCCCTGGACAAGGGCTTGAGTGGATGGGAAGGATCATCCCTAATCTTAATATACCCAATTACGCACAGAGATTCCAGGGCAGAATCACAATTACCGCGGAGAAATCCACGAGCACAGCCTACCTGGAGCTGAGCAGCCTGAGATCTGAGGACACGGCCGTATATTATTGTGCGAGAGGGGTCGGATATAGTGGAAGCGGGTCAAACTGGTACTTCGATCTCTGGGGCCGTGGCACCCTGGTCACCGTCTCCTCAG	﻿QVQLVQSGAEVKKPGSSVRVSCKASGGTFSSFTITWVRQAPGQGLEWMGRIIPNLNIPNYAQRFQGRITITAEKSTSTAYLELSSLRSEDTAVYYCARGVGYSGSGSNWYFDLWGRGTLVTVSS		IGLV1-40	IGLJ3	﻿CAGTCTGTGCTGACGCAGCCGCCCTCAGTGTCTGGGGCCCCAGGGCAGAGGGTCACCATCTCCTGCACTGGGAGCAGCTCCAACATCGGGGCAGGTTATGATGTACACTGGTACCAGCAACTTCCAGGAACAGCCCCCAAACTCCTCATCTCTGGTCACATCAATCGGCCCTCAGGGGTCCCTGACCGATTCTCTGGCTCCACGTCTGGCACCTCAGCCTCCCTGGCCATCACTGGGCTCCAGGCTGAGGATGAGGCTGATTATTACTGCCAGTCTTATGACAGCAGCCTGAGTGATTCGGTGTTCGGCGGAGGGACCAAGCTGACCGTCCT	﻿QSVLTQPPSVSGAPGQRVTISCTGSSSNIGAGYDVHWYQQLPGTAPKLLISGHINRPSGVPDRFSGSTSGTSASLAITGLQAEDEADYYCQSYDSSLSDSVFGGGTKLTV		2.96		78.0851	>1000
			C964		12m		clone		IGHV3-9	IGHJ3	﻿GAAGTGCAGCTGGTGGAGTCTGGGGGAGGCTTGGTACAGCCTGGCAGGTCCCTGAGACTCTCCTGTGCAGCCTCTGGATTCACCTTTGATGATTATGGCATGCACTGGGTCCGTCAAGCTCCAGGGAAGGGCCTGGAGTGGGTCTCAGGTATTAGTTGGAACAGTGGTAGTATAGCCTATGCGGAATTTGTGAAGGGCCGATTCACCATCTCCAGAGACAACGCCAAGAACTCCCTGTATCTGCAAATGAACAGTCTGAGAACTGAGGACACGGCCTTGTATTACTGTGCAAAAGCGGTTCCTACCAGCTGCTATGTGTTTTGTGCTCTTGATATTTGGGGCCAAGGGACAATGGTCACCGTCTCTTCAG	﻿EVQLVESGGGLVQPGRSLRLSCAASGFTFDDYGMHWVRQAPGKGLEWVSGISWNSGSIAYAEFVKGRFTISRDNAKNSLYLQMNSLRTEDTALYYCAKAVPTSCYVFCALDIWGQGTMVTVSS		IGKV1-27	IGKJ4	﻿GACATCCAGATGACCCAGTCTCCATCCTCCCTGTCTGCATCTGTAGGAGACAGAGTCACCATCACTTGCCGGGCGAGTCAGGGCATTAGCAATTATTTAGCCTGGTATCAGCAGAGCCCAGGGAAAGTTCCTAAGCTCCTGATCTATGCTGCATCCACTTTGCAATCAGGGGTCCCATCTCGGTTCAGTGGCAGTGGATCTGGGACAGATTTCACTCTCACCATCAGCAGCCTGCAGCCTGAAGATGTTGCAACTTATTACTGTCAAAAGTATAACAGTGGCCCTGCGCTCACTTTCGGCGGAGGGACCAAGGTGGAAATCAAAC	﻿DIQMTQSPSSLSASVGDRVTITCRASQGISNYLAWYQQSPGKVPKLLIYAASTLQSGVPSRFSGSGSGTDFTLTISSLQPEDVATYYCQKYNSGPALTFGGGTKVEIK		2.79		>1000	>1000
			C965		12m		clone		IGHV3-49	IGHJ4	﻿GAGGTGCAGCTGGTGGAGTCTGGGGGAGGCTTGGTAAAGCCAGGGCGGTCCCTGAGACTCTCCTGTTCAGCTTCTGGATTCACCTTTGGTGATTATGCTATGACCTGGTTCCGCCAGGCTCCAGGGAAGGGGCTGCAGTGGGTTGGTTTCATTAGAAGCAAACCTTTTGGTGGGACAACACAATACGCCGCGTCTGTGAAAGGCAGATTCACCATCTCAAGAGATGATTCCAACAACGTCGCCTATCTGCAAATGAACAGCCTTAAAACCGAGGACACAGGCGTGTATTATTGTACTAGATTAAGACAGGTTCAGGGAGTCCCCGGGTACTACTTTGACCAGTGGGGCCAGGGAGCCCTGGTCACCGTCTCCTCAG	﻿EVQLVESGGGLVKPGRSLRLSCSASGFTFGDYAMTWFRQAPGKGLQWVGFIRSKPFGGTTQYAASVKGRFTISRDDSNNVAYLQMNSLKTEDTGVYYCTRLRQVQGVPGYYFDQWGQGALVTVSS		IGKV3-15	IGKJ4	﻿GAAATAGTGATGACGCAGTCTCCAGCCACCCTGTCTGTGTCTCCAGGGGAAAGAGCCACCCTCTCCTGCAGGGCCAGTCAGAGTGTTAGCAGCAACTTAGCCTGGTACCAGCAGAAACCTGGGCAGGCTCCCAGGCTCCTCATCTATGGTGCATCCATCAGGGCTACTGGTATCCCAGCCAGGTTCAGTGGCAGTGGGTCTGGGACAGAGTTCACTCTCACCATCAGCAGCCTGCAGTCTGAAGATTTTGTTGTTTATTACTGTCAGGAGTATGATAACTGGTTCGCTTTCGGCGGAGGGACCAAGGTGGAAATCAAAC	﻿EIVMTQSPATLSVSPGERATLSCRASQSVSSNLAWYQQKPGQAPRLLIYGASIRATGIPARFSGSGSGTEFTLTISSLQSEDFVVYYCQEYDNWFAFGGGTKVEIK		1.69		2.63003	18.5654
			C966		12m		clone		IGHV3-13	IGHJ4	﻿GAGGTGCAGCTGGTGGAGTCTGGGGGAGGCTTGATACAGCCTGGGGGGTCTCTGAGACTCTCCTGTGCAGCCTCTGGATTCACCTTCAGTAGCTACGACATGCACTGGGTCCGCCAAGTTACAGGAAAAGGTCTGGAGTGGGTCTCAGCTATTGGTACTGCTGGAGACAGATACTATCTAGACTCCGTGAAGGGCCGATTCACCATCTCCAGAGAAAATGCCAAGAACTCCCTGCATCTTCAGATGAACAACCTGAGAGTCGGAGACACGGCTGTGTATTACTGTGCAAGAGCCTCTGGAGTCCTTACTACACACTTTGACTCCTGGGGCCGGGGAACCCTGGTCACCGTCTCCTCAG	﻿EVQLVESGGGLIQPGGSLRLSCAASGFTFSSYDMHWVRQVTGKGLEWVSAIGTAGDRYYLDSVKGRFTISRENAKNSLHLQMNNLRVGDTAVYYCARASGVLTTHFDSWGRGTLVTVSS		IGKV1-39	IGKJ1	﻿GACATCCAGATGACCCAGTCTCCATCCTCCCTGTCTGCATCTGTAGGAGACAGAGTCACCATCACTTGCCGGGCAAGTCAGAGCATTGGCAGACATTTAAGTTGGCATCAGCAGAAACTAGGGAAAGCCCCTAAGCTCCTCATTTATAGTGCATCCAGTTTGCAAAGTGGGGTCCCATCAAGGTTCAGTGGCAGTGGATCTGGGACAGATTTCACTCTCACCATCAGCAGTCTACAACCTGAAGATTTTGCAACTTACTACTGTCAACAGAGTTACGAAACCCCTCCGTGGACGTTCGGCCAAGGGACCAAGGTGGAGATCAAAC	﻿DIQMTQSPSSLSASVGDRVTITCRASQSIGRHLSWHQQKLGKAPKLLIYSASSLQSGVPSRFSGSGSGTDFTLTISSLQPEDFATYYCQQSYETPPWTFGQGTKVEIK		1.97		>1000	>1000
			C967		6.2m		singlet		IGHV3-33	IGHJ3	﻿CAGGTGCAGCTGGTGGAGTCTGGGGGAGGCGTGGTCCAGCCTGGGAGGTCCCTGAGACTCTCATGTGCAGCGTCTGGATTCACCTTCAGAATTTATGCCATGCACTGGGTCCGCCAGGCTCCAGGCAAGGGACTGGAGTGGGTGGCAATTATCTGGAATGATGGAAGTAAACAATATTATGCAGACTCCATGAAGGGCCGATTCACCATCTCCAGAGACAATTCCAAGAACACACTGTATCTGCAAATGAACAGCCTGAGAGACGAGGACACGGCTCTGTATTACTGTGCGAGAGAGGGTGTTGCATTAGCCGGCAACGGCGTCGATGGTTTTGATATCTGGGGCCAAGGGACAATGGTCACCGTCTCTTCAG	﻿QVQLVESGGGVVQPGRSLRLSCAASGFTFRIYAMHWVRQAPGKGLEWVAIIWNDGSKQYYADSMKGRFTISRDNSKNTLYLQMNSLRDEDTALYYCAREGVALAGNGVDGFDIWGQGTMVTVSS		IGKV1-39	IGKJ2	﻿GACATCCAGATGACCCAGTCTCCATCCTCCCTGTCTGCGTCTGTAGGGGACAGAGTCACCATCACTTGCCGGGCAAGTCAGACCATTAGCACCTTTTTAAATTGGTATCGACAAATACCAGGAAAAGCCCCTAAACTCCTGATCTATGCTGCATCCAGTTTGCAAAGTGGGGTCCCCTCAAGGTTCAGTGGCAGTGGGTCTGGGACAGATTTCACTCTCACCATCAGCAGTCTCCAACCTGAAGATTTTGCAACTTACTACTGTCAACAGACTTACAGTACCCCGTACACTTTTGGCCGGGGGACCAAGCTGGAGATCAAAC	﻿DIQMTQSPSSLSASVGDRVTITCRASQTISTFLNWYRQIPGKAPKLLIYAASSLQSGVPSRFSGSGSGTDFTLTISSLQPEDFATYYCQQTYSTPYTFGRGTKLEIK		3.58		14.6443	33.5302
			C968		12m		singlet		IGHV3-33	IGHJ3	﻿CAGGTGCAGCTGGTGGAGTCTGGGGGAGGCGTGGTCCAGCCTGGGAGATCCCTGAGACTCTCCTGTGCAGCGTCTGGATTCACCTTCAGAATTTATGCCATGCACTGGGTCCGCCAGGCTCCAGGCAAGGGGCTGGAGTGGGTGGCAATTATATGGAATGATGGAAATAAAAAGGACTATGTAGACTCCGTGAAGGGCCGATTCACCATCTCCAGAGACAATTCCAGGAACACAGTGTATCTGCAAATGAACAGCCTGAGAGTCGATGAGGACACGGCTGTGTATTATTGTGCGAGAGAGGGTGTAGCAGTAGGTGGTAACGGCGTTGATGGTTTTGATATGTGGGGCCAAGGGACAATGGTCACCGTCTCTTCAG	﻿QVQLVESGGGVVQPGRSLRLSCAASGFTFRIYAMHWVRQAPGKGLEWVAIIWNDGNKKDYVDSVKGRFTISRDNSRNTVYLQMNSLRVDEDTAVYYCAREGVAVGGNGVDGFDMWGQGTMVTVSS		IGKV1-39	IGKJ2	﻿GACATCCAGATGACCCAGTCTCCATCCTCCCTGTCTTCATCTGTAGGGGACAGAGTCACCATCACTTGTCGGGCAAGTCAGAGCATTGGCATCTATTTAAATTGGTATCAACAAAAACCAGGGAAGGTCCCTAACCTACTGATCTATGCTGCATCCACTTTGCAAACTGGGGCCCCATCAAGGTTCAGTGGCAGTGGATCTGGGACAGATTTCATTCTCAGCATCAGCAGTCTCCAACCTGAAGATTTTGCAACTTACTACTGTCAACAGACTTACAGTGTCCCGTACACTTTTGGCCAGGGGACCAAGCTGGAGATCAAAC	﻿DIQMTQSPSSLSSSVGDRVTITCRASQSIGIYLNWYQQKPGKVPNLLIYAASTLQTGAPSRFSGSGSGTDFILSISSLQPEDFATYYCQQTYSVPYTFGQGTKLEIK		3.19		5.73413	63.1504
			C969		1.3m		singlet		IGHV4-59	IGHJ5	﻿CAGGTGCAGCTGCAGGAGTCGGGCCCAGGACTGGTGAAGCCTTCGGAGACCCTGTCCCTCACCTGCACTGTCTCTGGTGGCTCCATCAGTAGTTACTACTGGAGCTGGATCCGGCAGCCCCCAGGGAAGGGACTGGAGTGGATTGGGTATATCTATTACAGTGGGAGCACCAACTACAACCCCTCCCTCAAGAGTCGAGTCACCATATCAGTAGACACGTCCAAGAACCAGTTCTCCCTGAAGCTGAGCTCTGTGACCGCCGCAGACACGGCCGTGTATTACTGTGCGAGACTATTATCCACGGAGTGGTTATTTAACTGGTTCGACCCCTGGGGCCAGGGAACCCTGGTCACCGTCTCCTCAG	﻿QVQLQESGPGLVKPSETLSLTCTVSGGSISSYYWSWIRQPPGKGLEWIGYIYYSGSTNYNPSLKSRVTISVDTSKNQFSLKLSSVTAADTAVYYCARLLSTEWLFNWFDPWGQGTLVTVSS		IGLV3-1	IGLJ1	﻿TCCTATGAGCTGACACAGCCACCCTCAGTGTCCGTGTCCCCAGGACAGACAGCCAGCATCACCTGCTCTGGAGATAAATTGGGGGATAAATATGCTTGCTGGTATCAGCAGAAGCCAGGCCAGTCCCCTGTGCTGGTCATCTATCAAGATAGCAAGCGGCCCTCAGGGATCCCTGAGCGATTCTCTGGCTCCAACTCTGGGAACACAGCCACTCTGACCATCAGCGGGACCCAGGCTATGGATGAGGCTGACTATTACTGTCAGGCGTGGGACAGCAGCACTGCTTATGTCTTCGGAACTGGGACCAAGGTCACCGTCCTAG	﻿SYELTQPPSVSVSPGQTASITCSGDKLGDKYACWYQQKPGQSPVLVIYQDSKRPSGIPERFSGSNSGNTATLTISGTQAMDEADYYCQAWDSSTAYVFGTGTKVTVL		3.49		585.284	>1000
			C970		12m		clone		IGHV4-59	IGHJ5	﻿CAGGTGCAGCTGCAGGAGTCGGGCCCAGGACTGGTGAAGCCTTCGGAGACCCTGTCCCTCACCTGCACTGTCTCTGGTGACTCCATCAATAAATACTACTGGGGCTGGATCCGGCAGCCCCCAGGGAAGGGACTGGAGTGGATTGGGTATATCTACTACAGTGGGACCACCAACTACAACCCCTCCCTCAAGAGTCGAGTCACCATATCAGTAGACACGTCTAAGACCCAGTTCTCCCTGAAGCTGAGCTCTGTGACCGCCGCAGACACGGCCGTGTATTACTGTGCGAGACTATTATCTACGGAGTGGTCATTTAACTGGTTCGACCCCTGGGGCCAGGGAACCCTGGTCACCGTCTCCTCAG	﻿QVQLQESGPGLVKPSETLSLTCTVSGDSINKYYWGWIRQPPGKGLEWIGYIYYSGTTNYNPSLKSRVTISVDTSKTQFSLKLSSVTAADTAVYYCARLLSTEWSFNWFDPWGQGTLVTVSS		IGLV3-1	IGLJ1	﻿TCCTATGAGCTGACTCAGCCACCCTCAGTGTCCGTGTCCCCAGGACAGACAGCCAGCATCACCTGCTCTGGAGATACATTGGGGGATAAATATGCTTGCTGGTATCAGCAGAAGCCAGGCCAGTCCCCTCTCCTGGTCATCTATCAAAATAACAAGCGGCCCTCAGGGATCCCTGAGCGATTCTCTGGCTCCAACTCTGGGAACACAGCCACTCTGACCATCAGCGGGACCCAGGCTATGGATGAGGCTGACTATTACTGTCAGGCGTGGGACAGCAGCACTGCTTATGTCTTCGGAACTGGGACCAAGGTCACCGTCCTAG	﻿SYELTQPPSVSVSPGQTASITCSGDTLGDKYACWYQQKPGQSPLLVIYQNNKRPSGIPERFSGSNSGNTATLTISGTQAMDEADYYCQAWDSSTAYVFGTGTKVTVL		3.71		3.63654	16.3486
			C971		12m		clone		IGHV3-15	IGHJ3	﻿GAGGTGCAGCTGGTGGAGTCTGGGGGAGGCTTGGTAAAGCCTGGGGGGTCCCTTAGACTCTCCTGTGCAGCCTCTGGATTCACTTTCAATAACGCCTGGATGACCTGGGTCCGCCAGGCTCCAGGGAAGGGGCTGGAGTGGGTTGGCCGTATTAAAAGCAAAACTGATGGTGGGACAACGGACTACGGTACACCCGCGAAAGGCAGATTCACCATCTCAAGAGATGACTCAAAAAACACGTTGTATCTGCAAATGAAAAGCCTGAGAACCGAGGACACAGCCGTCTATTATTGTACTACAGTAGACGTACAAGGAATTTGGGAGCTGCTAGAGAATGATGCCTTTGATATCTGGGGCCAAGGGACAATGGTCACCGTCTCTTCAG	﻿EVQLVESGGGLVKPGGSLRLSCAASGFTFNNAWMTWVRQAPGKGLEWVGRIKSKTDGGTTDYGTPAKGRFTISRDDSKNTLYLQMKSLRTEDTAVYYCTTVDVQGIWELLENDAFDIWGQGTMVTVSS		IGKV3-20	IGKJ3	﻿GAAATTGTGTTGACGCAGTCTCCAGGCACCCTGTCTTTGTCTCCAGGGGAAAGAGCCACCCTCTCCTGCAGGGCCACTCAGGCTATTAGCAGCACCTACTTAGCCTGGTACCAGCAGAAACCTGGCCAGGCTCCCAGGCTCCTCATCTATGGTGCATTCAGCAGGGCCCCTGGCATCCCAGACAGGTTCAGTGGCAGTGGGTCTGAGACAGACTTCACTCTCACCATCAGCAGACTGGAGCCTGAAGATTTTGCAGTGTATTACTGTCAACAGTCTGATAGGTCACCTTTCACTTTCGGCCCTGGGACCAAAGTGGATATCAAAC	﻿EIVLTQSPGTLSLSPGERATLSCRATQAISSTYLAWYQQKPGQAPRLLIYGAFSRAPGIPDRFSGSGSETDFTLTISRLEPEDFAVYYCQQSDRSPFTFGPGTKVDIK		2.21		90.4275	>1000
			C972		12m		clone		IGHV3-66	IGHJ4	﻿GAGGTGCAGCTGGTGGAGTCTGGGGGAGGCTTGGTCCAGCCTGGGGGGTCCCTGAGACTCTCCTGTGCAGCCTCTGAATTCATCGTCAGTAGAAACTACATGAGCTGGGTCCGCCAGGCTCCAGGGAAGGGGCTGGAGTGGGTCTCACTTATTTATCCCGGTGGTAGCACATATTATCCAGACTCCGTGAAGGGCAGATTCACCATCTCCAGAGACAATTCCAAGAACACACTGTATCTTCAAATGAACAGCCTGAGAGGCGAGGACACGGCTGTATATTACTGTGCGAGAGATTTAGGTGATAGTCGCCTTGACTACTGGGGACAGGGAGCCCTGGTCACCGTCTCCTCAG	﻿EVQLVESGGGLVQPGGSLRLSCAASEFIVSRNYMSWVRQAPGKGLEWVSLIYPGGSTYYPDSVKGRFTISRDNSKNTLYLQMNSLRGEDTAVYYCARDLGDSRLDYWGQGALVTVSS		IGKV1-9	IGKJ2	﻿GACATCCAGTTGACCCAGTCTCCATCCTTCCTGTCTGCATCTGTAGGAGACAGAGTCACCATCACTTGCCGGGCCAGTCAGGGCATTAGCAGTTATTTAGCCTGGTATCAGCAAGACCCAGGGAAAGCCCCTAAACTCCTGATCTATGCTGCGTCCACTTTGCAGAGTGGCGTCCCATCAAGGTTCAGCGGCAGTGGATCTGGGACAGAATTCACTCTCACAATCAGCAGCCTGCAGCCTGAAGATTTTGCAACTTATTACTGTCAACAACTTGATAGTTACCCTCCAGGGTACAGTTTTGGCCAGGGGACCAAGCTGGAGATCAAAC	﻿DIQLTQSPSFLSASVGDRVTITCRASQGISSYLAWYQQDPGKAPKLLIYAASTLQSGVPSRFSGSGSGTEFTLTISSLQPEDFATYYCQQLDSYPPGYSFGQGTKLEIK		2.18		11.5239	46.1987
			C973		12m		clone		IGHV3-49	IGHJ4	﻿GAGGTGCAGCTGGTGGAGTCTGGGGGAGGCTTGGAAAAGCCAGGGCGGTCCCTGAGACTCTCCTGTATAGGTTCTGGATTCACCTTCGGTGATTATGCTATGGGCTGGTTCCGCCAGGCTCCAGGGAAGGGGCTGGAGTGGGTAGGTTTCATTAGAAGTAAAGCTTATGGTGGGGCATCAGAATACGCCGCGTCTGTGAAAGGCAGATTCACCATCTCAAGAGATGATTCCAAAAGCATCGCCTATCTGCAAATGAACAGCCTGAAAACCGAGGACACAGCCGTCTATTTTTGTACTAGAAGAGCCCATTACTCTGGTTCAGGACTTAGCAGTTATGTTGACTACTGGGGCCAGGGAACCCTGGTCACCGTCTCCTCAG	﻿EVQLVESGGGLEKPGRSLRLSCIGSGFTFGDYAMGWFRQAPGKGLEWVGFIRSKAYGGASEYAASVKGRFTISRDDSKSIAYLQMNSLKTEDTAVYFCTRRAHYSGSGLSSYVDYWGQGTLVTVSS		IGLV7-46	IGLJ3	﻿CAGACTGTGGTGACTCAGGAGCCCTCACTGACTGTGTCCCCAGGAGGGACAGTCACTCTCACCTGTGGCTCCAGCACTGGAACTGTCACCAGTGGTCAGTATCCCTACTGGTTCCAGCAGAAGCCTGGCCAAGCCCCCAAGACACTGATTTATGATACAAGCAGCAAACACTCCTGGACCCCTGCCCGGTTTTCAGGCTCCCTCCTTGGGGGCAAAGCTGCCCTGACCCTTTCGGGTGCGCAGCCTGAGGATGAGGCTGAGTATTACTGCTTGATCTCCTATAGTGGTGCTTGGGTGTTCGGCGGAGGGACCAAGCTGACCGTCCTA	﻿QTVVTQEPSLTVSPGGTVTLTCGSSTGTVTSGQYPYWFQQKPGQAPKTLIYDTSSKHSWTPARFSGSLLGGKAALTLSGAQPEDEAEYYCLISYSGAWVFGGGTKLTVL		2.87		5.70796	41.1126
			C974		6.2m		singlet		IGHV3-13	IGHJ2	﻿GAGGTGCAGCTGGTGGAGTCTGGGGGAGACTTGACACAGCCGGGGGGGTCCCTGAGACTCTCCTGTGCAGCCTCTGGATTCACCTTCAGCAACTACGACATGCACTGGGTCCGCCAAGCTACAGGAAAAGGTCTGGAGTGGGTCTCAGGTATTGGTACTTCTGGTGACACATACTATGCAGACTCCGTGAAGGGCCGATTCACCATCTCCAGAGAAAATGCCAAGAACTCCTTGTTTCTTCAAATGAATCATCTGAGAGCCGGGGACACGGCTACGTATTACTGTGCAAGAACGGAGTACGCTTGGGGGAGTTATCGTTCCTACTGGTACTTCGACCTCTGGGGCCGAGGCACCCTGGTCACCGTCTCCTCAG	﻿EVQLVESGGDLTQPGGSLRLSCAASGFTFSNYDMHWVRQATGKGLEWVSGIGTSGDTYYADSVKGRFTISRENAKNSLFLQMNHLRAGDTATYYCARTEYAWGSYRSYWYFDLWGRGTLVTVSS		IGKV1-39	IGKJ1	﻿GACATCCAGATGACCCAGTCTCCATCCTCCCTGTCTGCATCTGTAGGAGACAGAGTCACCATCACTTGCCGGACAAGTCAGACCATTAGCACCTATTTAAATTGGTATCAGCAGAAACCAGGGAAAGCCCCTAAGGTCCTGATCTTTGCTGCGTCCAGTTTGCAAAGTGGGGTCCCATCAAGATTCAGTGGCAGTGGATCTGGGACAGATTTCACTCTCACCATCAGCAGTCTGCAACCTGAAGATTTTGCAACTTACTTCTGTCAACAGAGTTACAGTGCCCCTCCGTGGACGTTCGGCCCAGGGACCAAGGTGGAGATCAAAC	﻿DIQMTQSPSSLSASVGDRVTITCRTSQTISTYLNWYQQKPGKAPKVLIFAASSLQSGVPSRFSGSGSGTDFTLTISSLQPEDFATYFCQQSYSAPPWTFGPGTKVEIK		2.94		>1000	>1000
			C975		12m		singlet		IGHV3-13	IGHJ2	﻿GAGGTGCAGCTGGTGGAGTCTGGGGGAGACTTGACACAGCCTGGGGGGTCCCTGAGACTCTCCTGTGCAGCCTCTGGATTCACCTTCAGCAGCTACGACATGCACTGGGTCCGCCAAGCTACAGGAAAAGGTCTGGAGTGGGTCTCAGGTATTGGTACTTCTGGTGACACATACTATGCAGACTCCGTGAAGGGCCGATTCACCATCTCCAGAGAAAATGCCAAGAACTCTTTGTTTCTTCAAATGAATAATCTGAGAGCCGGGGACACGGCTACGTATTACTGTGCAAGAACGGAGTACGCTTGGGGGAGTTATCGTTCCTACTGGTACTTCGATCTCTGGGGCCGAGGCACCCTGGTCACCGTCTCCTCAG	﻿EVQLVESGGDLTQPGGSLRLSCAASGFTFSSYDMHWVRQATGKGLEWVSGIGTSGDTYYADSVKGRFTISRENAKNSLFLQMNNLRAGDTATYYCARTEYAWGSYRSYWYFDLWGRGTLVTVSS		IGKV1-39	IGKJ1	﻿GACATCCAGATGACCCAGTCTCCATCCTCCCTGTCTGCATCTGTAGGAGACAGAGTCACCATCACTTGCCGGACAAGTCAGACCATTAGCACCTATTTAAATTGGTATCAGCAGAAACCAGGGAAAGCCCCTAAGGTCCTGATCTATGCTGCGTCCAGTTTGCAAAGTGGGGTCCCATCAAGATTCAGTGGCAGTGGATCTGGGACAGATTTCACTCTCACCATCAGCAGTCTGCAACCTGAAGATTTTGCAACTTACTTCTGTCAACAGAGTTACAGTGCCCCTCCGTGGACGTTCGGCCCAGGGACCAAGGTGGAAATCAAAC	﻿DIQMTQSPSSLSASVGDRVTITCRTSQTISTYLNWYQQKPGKAPKVLIYAASSLQSGVPSRFSGSGSGTDFTLTISSLQPEDFATYFCQQSYSAPPWTFGPGTKVEIK		2.88		>1000	>1000
			C976		12m		clone		IGHV3-53	IGHJ4	﻿GAGGTGCAGCTGGTGGAGTCTGGGGGCGCCTTGATCCAGCCGGGGGGATCCCTGAGACTCTCCTGTGCAGCCTCTGGGTTCACCGTCAGTAGCAACGACATGACCTGGGTCCGCCAGGCTCCAGGGAAGGGGCTGGAGTGGGTCTCAGTTATTTATACCGGTGGTGGAACATATCACGCAGACTCCGCGAAGGGACGATTCATCATCTCTAGACACAACTCCAAGAACACGTTGTCTCTTCAAATGAACGACCTGAGAGCTGAGGACACGGCCGTGTATTACTGTGCGAGACTGACTATGACCACATACTACTTTGACTCCTGGGGCCAGGGAACCCTGGTCACCGTCTCCTCAG	﻿EVQLVESGGALIQPGGSLRLSCAASGFTVSSNDMTWVRQAPGKGLEWVSVIYTGGGTYHADSAKGRFIISRHNSKNTLSLQMNDLRAEDTAVYYCARLTMTTYYFDSWGQGTLVTVSS		IGLV3-21	IGLJ3	﻿TCCTATGAGCTGACACAGCCACCCTCGGTGTCACTGGCCCCAGGACAGACGGCCAGGATTACCTGTGGGGGAAACGGCATTGGAAGTAAATCTGTACACTGGTACCAGCAGAAGCCAGGCCGGGCCCCTGTGCTGGTCGTCTATGACGACAGCGTCCGGCCCTCAGGGACCCCTGCGCGATTTTCTGGCGCCAACTCTGGGAACACGGCCACCCTGACCATCAGCAGGGTCGAAGCCGGGGATGAGGCCGACTATTACTGTCAGGTGTGGGATAGTTTTAGAGATCATCAAGATTGGGTGTTCGGCGGAGGGACCAAGCTGACCGTCCTAG	﻿SYELTQPPSVSLAPGQTARITCGGNGIGSKSVHWYQQKPGRAPVLVVYDDSVRPSGTPARFSGANSGNTATLTISRVEAGDEADYYCQVWDSFRDHQDWVFGGGTKLTVL		2.52		>1000	>1000
			C977		12m		singlet		IGHV3-13	IGHJ4	﻿GAGGTGCAGCTGGTGGAGTCTGGGGGAGGCTTGGTACAGCCGGGGGGGTCCCTGAGACTCTCCTGTGCAGCCTCTGGATTCACCTTCAGTAACTACGACATGCACTGGGTCCGCCAAGTCACAGGAAAAGGTCTGGAGTGGGTCTCACTTATTGGTACTGCTGCTGACGCATACTATGCAGACTCCGTGAAGGGCCGATTCACCATCTCCAGAGAAAATGCCAAGAACTCCTTATACCTTCAAATAAACAGCCTGAGAGCCGGGGACACGGCTGTGTATTTCTGTGCAAGAGGAGATAGCAGTGGCTTATACACTTTTTTTGACTACTGGGGCCAGGGAACCCTGGTCACCGTCTCCTCAG	﻿EVQLVESGGGLVQPGGSLRLSCAASGFTFSNYDMHWVRQVTGKGLEWVSLIGTAADAYYADSVKGRFTISRENAKNSLYLQINSLRAGDTAVYFCARGDSSGLYTFFDYWGQGTLVTVSS		IGKV1-39	IGKJ4	﻿GACATCCAGATGACCCAGTCTCCATCCTCCCTGTCTGCATCTGTCGGAGACAGAGTCACCATCACTTGCCGGGCAAGTCAGAGCGTTACTAGGTATTTAAATTGGTATCAGCTGAAACCAGGGAAAGCCCCTAAGCTCCTGATCTATGCTGCATCCAGTTTGCAAAGTGGGGTCCCATCAAGGTTCAGTGGCAGTGGATCTGGGACAGATTTCACTCTCACCATCAGCAGTCTGCAACCTGAAGATTTTGCAACTTATTACTGTCAACAGAGTTACAGTACCCTCGGGCTCACTTTCGGCGGAGGGACCAAGGTGGAGATCA	﻿DIQMTQSPSSLSASVGDRVTITCRASQSVTRYLNWYQLKPGKAPKLLIYAASSLQSGVPSRFSGSGSGTDFTLTISSLQPEDFATYYCQQSYSTLGLTFGGGTKVEI		2.13		>1000	>1000
			C978		12m		clone		IGHV1-69	IGHJ4	﻿CAGGTGCAGCTGGTGCAGTCTGGGGCTGAGGTGAAGAAGCCTGGGTCCTCGGTGAAGGTCTCCTGCAAGGCTTCTGGAGCCACCTTCAGCAACTATATTATTTCCTGGGTGCGACAGGCCCCTGGACAAGGGCTTGAGTGGATGGGAAGGACCATCCCTCTCCTTGATATTGCAAACTACGCACAGAAATTCCAGGGCAGAGTCACCATAACCGCGGACAAATCCACGCGCATTGTCTACATGCACCTGGGCAGTCTGACATCTGAGGACACGGCCGTCTATTACTGTGCGACAGGAAAGGGGTATAGCAGCTCTTCCGCGGCTTACTACTTTGACCACTGGGGCCAGGGAACCCTGGTCACCGTCTCCTCAG	﻿QVQLVQSGAEVKKPGSSVKVSCKASGATFSNYIISWVRQAPGQGLEWMGRTIPLLDIANYAQKFQGRVTITADKSTRIVYMHLGSLTSEDTAVYYCATGKGYSSSSAAYYFDHWGQGTLVTVSS		IGLV1-40	IGLJ3	﻿CAGTCTGTGCTGACGCAGCCGCCCTCAGTGTCTGGGGCCCCAGGGCAGAGGGTCACCATTTCCTGCACTGGTACCAACTCCAACATCGGGGCAGGTTATGATATACACTGGTACCAGCAGCTTCCAGGAACGGCCCCCAAACTCCTCATCTATGGTAGCAATAATCGGCCCTCAGGGGTCCCTGACCGATTCTCTGGCTCCAAGTCTGGCACCTCAGCCTCCCTGGCCATCACTGGGCTCCAGGCTGAGGATGAAGCTGATTATTACTGCCAGTCCTATGACAGCAGCCTGAGTGGATCGGAGGTGTTCGGCGGCGGGACCAAGTTGACCGTCCTAG	﻿QSVLTQPPSVSGAPGQRVTISCTGTNSNIGAGYDIHWYQQLPGTAPKLLIYGSNNRPSGVPDRFSGSKSGTSASLAITGLQAEDEADYYCQSYDSSLSGSEVFGGGTKLTVL		2.09		121.854	>1000
			C979		12m		singlet		IGHV3-30	IGHJ6	﻿CAGGTGCAGCTGGTGGAGTCTGGGGGAGGCGTGGTCCAGCCTGGGAGGTCCCTAAGACTCTCCTGTGTAGCCTCTGGATTCACCTTCAGTAACTACGGCATGCACTGGGTCCGCCAGGCTCCAGGCAAGGGGCTGGAGTGGGTGGCAGTTATATTATATGATGGAAGTGATAAATACTATTTAGACTCCGTGAAGGGCCGATTCACCATCTCCAGAGACAATTCCAAGAACACACTGTTTCTGCAATTGAACAGCCTGAGAGCTGAGGACACGGCTGTGTATTACTGTGCGAAAGAAGGAAACGGCTATGGTTACCAGTACGCCGGTATGGACGTCTGGGGCCAAGGGACCACGGTCACCGTCTCC	﻿QVQLVESGGGVVQPGRSLRLSCVASGFTFSNYGMHWVRQAPGKGLEWVAVILYDGSDKYYLDSVKGRFTISRDNSKNTLFLQLNSLRAEDTAVYYCAKEGNGYGYQYAGMDVWGQGTTVTVS		IGLV2-14	IGLJ3	﻿CAGTCTGCCCTGACTCAGCCTGCCTCCGTGTCTGGGTCTCCTGGACAGTCGATCACCATCTCCTGCACTGGCACCAACAGTGACGTTGGTGGTTATGACTATGTCTCCTGGTACCAACAGCACCCAGGCAAAGCCCCCAAACTCATAATTTTTGAAGTCATTAATCGACCCTCAGGGGTTTCTAATCGCTTCTCTGGCTCCAAGTCTGGCAACACGGCCTCCCTGACCATCTCTGGGCTCCGGGCTGAGGACGAGGCTGATTATTACTGCTGTTCATATACAACCAGCACCACTCGGGTCTTCGGCGGAGGGACCAAGCTGACCGTCCTAG	﻿QSALTQPASVSGSPGQSITISCTGTNSDVGGYDYVSWYQQHPGKAPKLIIFEVINRPSGVSNRFSGSKSGNTASLTISGLRAEDEADYYCCSYTTSTTRVFGGGTKLTVL		2.54		>1000	>1000
			C980		12m		singlet		IGHV1-69	IGHJ5	﻿QVQLVESGGGVVQPGRSLRLSCVASGFTFSNYGMHWVRQAPGKGLEWVAVILYDGSDKYYLDSVKGRFTISRDNSKNTLFLQLNSLRAEDTAVYYCAKEGNGYGYQYAGMDVWGQGTTVTVS	﻿QVQLVQSGAEVKKPGSSVKVSCEASGGTFSSDSINWVRQAPGQGLEWMGRIIPIFGATNYAQKFQGRVTITADKSTDTVYMEVSSLTSEDTAVYYCARGGIAVGGWWFDPWGQGTLVTVSS		IGKV3-15	IGKJ2	﻿GAAATAGTGATGACGCAGTCTCCAGCCACCCTGTCTGTGTCTCCAGGGGAAAGAGCCACCCTCTCCTGCAGGGCCAGCGAGAGTGTTAGCAGCAAGTTAGCCTGGTACCAGCAGAAACCTGGCCAGGCTCCCAGGCTCCTCATCTATGGTGCATCCACCAGGGCCACTGGTATCTCAGCCAGGTTCAGTGGCAGTGGGTCTGGGACAGATTTCACTCTCACCATCAGCAGCCTGGAGTCTGAAGATTTTGCAGTTTATTACTGTCAGCAGTATAATCACTGGCCTCCGAACACTTTTGGCCAGGGGACCAAGCTGGAGATCAAAC	﻿EIVMTQSPATLSVSPGERATLSCRASESVSSKLAWYQQKPGQAPRLLIYGASTRATGISARFSGSGSGTDFTLTISSLESEDFAVYYCQQYNHWPPNTFGQGTKLEIK		4.07		3.80007	36.0504
			C981		12m		singlet		IGHV3-13	IGHJ2	﻿GAGGTGCAGCTGGTGGAGTCTGGGGGAGGCTTGGTACAGCCTGGGGGGTCCCTGAGACTCTCCTGTGCAGCCTCTGGTTTCACCTTCAGCAACTACGACATGCACTGGGTCCGCCAAGTTACAGGGAACGGTCTGGAGTGGGTCGCAGCTATTGGTACTTCTGGTGACACATACTATCCAGACTCCGTGAAGGGCCGATTCACCATCTCCAGAGAGAATGTCAAGAACTCCTTGTTTCTTCAAATGAACTCCCTGAGAGCCGGGGACACGGCTGTCTATTACTGTGCAAGAGGGGGTAGCAGCAGCTGGCTCTGGTACTTCGATCTCTGGGGCCGTGGCACCCTGGTCA	﻿EVQLVESGGGLVQPGGSLRLSCAASGFTFSNYDMHWVRQVTGNGLEWVAAIGTSGDTYYPDSVKGRFTISRENVKNSLFLQMNSLRAGDTAVYYCARGGSSSWLWYFDLWGRGTLV		IGKV1-39	IGKJ5	﻿GACATCCAGATGACCCAGTCTCCATCCTCCCTGTCTGCATCTGTAGGAGACAGAGTCACCATCACTTGCCGGGCAAGTCAGAGTATTAGCAGCCATTTAAATTGGTATCAGCAAAAACCAGGGAAAGTCCCTAAACTCCTGATCTATGCTGCATCCACTTTGCAAAGTGGGGTCCCATCAAGGTTCAGTGGCAGTGGATCTGGGACAGACTTCACTCTCACCATCAGCAGTCTGCAACCTGAAGACTTTGCAACCTACTACTGTCAACAGAGTTATAGTATGCCCCCGGTCACCTTCGGCCAAGGGACACGACTGGAGATTAAAC	﻿DIQMTQSPSSLSASVGDRVTITCRASQSISSHLNWYQQKPGKVPKLLIYAASTLQSGVPSRFSGSGSGTDFTLTISSLQPEDFATYYCQQSYSMPPVTFGQGTRLEIK		2.12		459.461	>1000
			C982		12m		singlet		IGHV3-13	IGHJ6	﻿GAGGTGCAGCTGGTGGAGTCTGGGGGAGGCTTGGTACAGCCTGGGGGGTCCCTGAGACTCTCCTGTGCAGCCTCTGGATTCACCTTCAGTAACTACGACATGCACTGGGTCCGCCAACCTACAGGAGGAGGTCTGGAGTGGGTCTCAGCTATTGGTACTGCTGGTGACACATACTATCTAGCCTCCGTGAAGGGCCGATTCACCATCTCCAGAGAAAATGCCAAGAACTCCTTGTCTCTTCAAATGAACAGCCTGAGAGCCGGGGACACGGCTGTGTATTATTGTGTAAGAGGGGATACTCTGGTTCAGGGAGTTATTAAGGCCTACTACTACTACTTTATGGACGTCTGGGGCCAAGGGATCACGGTCACCGTCTCCTCA	﻿EVQLVESGGGLVQPGGSLRLSCAASGFTFSNYDMHWVRQPTGGGLEWVSAIGTAGDTYYLASVKGRFTISRENAKNSLSLQMNSLRAGDTAVYYCVRGDTLVQGVIKAYYYYFMDVWGQGITVTVSS		IGKV1-39	IGKJ2	﻿GACATCCAGATGACCCAGTCTCCATCCTCCCTGTCTGCATCTGTGGGAGACAGAGTCACCATCACTTGCCGGGCAAGTCAGAACATTAGCAGATATTTAAATTGGTATCAGCAGAAACCAGGGAAAGCCCCTCGGCTCCTGATCTATGCTGCATCCACTTTGCAAAGTGGGGTCCCATCAAGGTTCAGTGCCAGTGGATCTGGGACAGACTTCACTCTCACCATCACCAATCTGCAACCTGAAGATTTTGCAGTTTATTACTGTCAACAGACTTACGTTATGCCTCCCTACACTCTTGCCCAGGGGACCAAGCTGGAGATCAAAC	﻿DIQMTQSPSSLSASVGDRVTITCRASQNISRYLNWYQQKPGKAPRLLIYAASTLQSGVPSRFSASGSGTDFTLTITNLQPEDFAVYYCQQTYVMPPYTLAQGTKLEIK		2.56		>1000	>1000
			C983		12m		singlet		IGHV3-30	IGHJ4	﻿CAGGTGCAGCTGGTGGAGTCTGGGGGGGGCGTGGTCCGGCCTGGGAGGTCCCTGAGACTCTCCTGTGCAGCCTCTGGATTCACCTTCAGTAAATATGGCATGCACTGGGTCCGCCAGGCTCCAGGCAAGGGGCTGGAGTGTGTGGCATCTATAGCGTATGATGGAAGTGATGACTCCTACGCAGACTCCGTGAAGGGCCGATTCATCATCTCCAGAGACAATTCCAAGAACACGCTGTATCTGCAAATGAACAGCCTGAGAGCTGCGGACACGGCTGTGTATTACTGTGCGAAAGTTCTTGGCTCATATTGTAGTGCTAGTAGCTGCCACGGACAAAGGCCTGACTATTGGGGCCAGGGAACCCTGGTCACCGTCTCCTCAG	﻿QVQLVESGGGVVRPGRSLRLSCAASGFTFSKYGMHWVRQAPGKGLECVASIAYDGSDDSYADSVKGRFIISRDNSKNTLYLQMNSLRAADTAVYYCAKVLGSYCSASSCHGQRPDYWGQGTLVTVSS		IGKV1-33	IGKJ1	﻿GACATCCAGATGACCCAGTCTCCATCCTCCCTGTCTGCATATGTAGGAGACAGAGTCACCATCACTTGCCAGGCGAGTCAGGACATTAGTAACCATTTAAATTGGTATCAGCAGAAACCAGGGAAAGCCCCTAACCTCCTGATCTACGATGCATCCAATTTGGAAACAGGGGTCCCATCAAGGTTCAGTGGAAGTGGATCTGGGACAGATTTTTCTTTCACCATCAGCAGCCTGCAGCCTGAAGATATTGCAACATATTACTGTCAACAGTATGATAATGTCCCTCCGTGGACGTTCGGCCAAGGGACCAAGGTGGAGATCAAAC	﻿DIQMTQSPSSLSAYVGDRVTITCQASQDISNHLNWYQQKPGKAPNLLIYDASNLETGVPSRFSGSGSGTDFSFTISSLQPEDIATYYCQQYDNVPPWTFGQGTKVEIK		2.11		>1000	>1000
			C984		12m		singlet		IGHV1-2	IGHJ6	﻿CAGGTGCAGCTGGTGCAGTCTGGGACTGAGGTGAAGAAGCCTGGGGACTCAGTGCAGGTCTCCTGCAAGACTTCTGGATACAGCTTCACCGGCTACTATATCCACTGGGTGCGACAGGCCCCTGGACAAGGGCTTGAGTGGATGGGACGGATCAACCCTAACAGTGGTGGCACAAACTATGCACAGAAGTTTCAGGGCAGGGTCATCATGACCAGGGACACGTCCATCACCACAGCCTTCATGGAGCTGACCAGACTGAGATATGACGACACGGCCGTCTATTTCTGTGCGAGAGAGCCGATTGAAGGAGTAATAGGTGGTATGATTGTGAACTACTACTACATGGACGTCTGGGGCAGAGGGACCACGGTCACCGTCTCCTCA	﻿QVQLVQSGTEVKKPGDSVQVSCKTSGYSFTGYYIHWVRQAPGQGLEWMGRINPNSGGTNYAQKFQGRVIMTRDTSITTAFMELTRLRYDDTAVYFCAREPIEGVIGGMIVNYYYMDVWGRGTTVTVSS		IGLV2-14	IGLJ2	﻿CAGTCTGCCCTGACTCAGCCTGCCTCCGTGTCTGGGTCTCCTGGACAGTCGATCACCATCTCCTGCACTGGAACCAGCAGTGACGTTGGAGGTTATTACTATGTCTCCTGGTACCAACAACACCCAGGCAAAGCCCCCAAACTCATGATTTATGATGTCAGTAGTCGGCCCTCAGGGGTTTCTAATCGCTTCTCTGGCTCCAAGTCTGGCAACACGGCCTCCCTGACCATCTCTGGGCTCCAGGCTGAGGACGAGGCTGATTATTACTGCAGCTCATATACAAGCAGCAACACTCTCGTGGTATTCGGCGGAGGGACCAAGCTGACCGTCCTAG	﻿QSALTQPASVSGSPGQSITISCTGTSSDVGGYYYVSWYQQHPGKAPKLMIYDVSSRPSGVSNRFSGSKSGNTASLTISGLQAEDEADYYCSSYTSSNTLVVFGGGTKLTVL		2.76		2.63785	17.3117
			C985		12m		singlet		IGHV1-2	IGHJ6	﻿CAGGTGCAGCTGGTGCAGTCTGGGGCTGAGGTGAAGAAGCCTGGGGCCTCAGTGAAGGTCTCCTGCAAGGCTTCTGGATACATCTTCACCGGCTACTATATGCACTGGGTGCGACAGGCCCCTGGACAAGGGCTTGAGTGGATGGGACGGATCAACCCTAATAGTGGTGGCTCAAGGTATGCAGAGAAGTTCCAGGGCAGGGTCACCATGACCAGGGACACGTCCATCATCACAGCCTTCATGGAACTGAGGGGGCTGAAATCTGACGACACGGCCGTGTATTATTGTGCGAGAGAGCCGATTGAAGCAGTTCCTGCTGGTATAATTGTGAACTATTACTACATGGACGTCTGGGGCAACGGGACCACGGTCACCGTCTCCTCA	﻿QVQLVQSGAEVKKPGASVKVSCKASGYIFTGYYMHWVRQAPGQGLEWMGRINPNSGGSRYAEKFQGRVTMTRDTSIITAFMELRGLKSDDTAVYYCAREPIEAVPAGIIVNYYYMDVWGNGTTVTVSS		IGLV2-14	IGLJ2	﻿CAGTCTGCCCTGACTCAGCCTGCCTCCGTGTCTGGGTCTCCTGGACAGTCGATCACCATCTCCTGCACTGGAACCAGCAGTGACGTTGGTGGTTATAACTATGTCTCCTGGTACCAACAACACCCAGGCAAAGCCCCCAAACTCATGATTTATGATGTCACTAGTCGGCCCTCAGGGGTTTCTGATCGCTTCTCTGGCTCCAAGTCTGGCACCACGGCCTCCCTGACCATCTCTGGGCTCCAGGCTGAGGACGAGGCTGATTATTACTGCAGCTCATTTACAAGCGCCTTCACTCTCGTGGTTTTCGGCGGAGGGACCAAACTGACCGTCCTAG	﻿QSALTQPASVSGSPGQSITISCTGTSSDVGGYNYVSWYQQHPGKAPKLMIYDVTSRPSGVSDRFSGSKSGTTASLTISGLQAEDEADYYCSSFTSAFTLVVFGGGTKLTVL		3.67		6.79373	31.3789
			C986		12m		clone		IGHV5-51	IGHJ2	﻿GAGGTGCAGCTGGTGCAGTCTGGAGCAGAGGTGAAAAAGCCCGGGGAGACTCTGAAGATCTCCTGTAAGGGTTCTGGAGACAGTTTTAGCAATTATTGGATCGGCTGGGTGCGCCAGAGTCCCGGGAAAGGCCTGGAGTGGATGGCGATCGTCTATCCTGGTGACTCTGATGCCAGATACAGTCCGTCGTTCCAAGGCCAGGTCACTATCTCAGCGGACAAGTCCGTCACCACCGCCTACTTGAAGTGGAGCAGCCTGAAGGCCTCGGACACCGCCATATATTATTGTGTGAGAGGATTACCAGTGGACTGGTACTTCGATCTCTGGGGCCGTGGCACCCTGGTCACCGTCTCCTCAG	﻿EVQLVQSGAEVKKPGETLKISCKGSGDSFSNYWIGWVRQSPGKGLEWMAIVYPGDSDARYSPSFQGQVTISADKSVTTAYLKWSSLKASDTAIYYCVRGLPVDWYFDLWGRGTLVTVSS		IGLV1-40	IGLJ1	﻿CAGTCTGTGCTGACGCAGCCGCCCTCAGTGTCTGGGGCCCCAGAGCAGAGGGTCACCATCTCCTGCACTGGGTCCAGCTCCAACATCGGGGCAGGTCATGATGTACACTGGTACCAGCAGCTGCCAGGAACAGCCCCCAAACTCCTCATCTATAATAACAACAATCGGCCCTCGGGGGTCCCTGACCGATTCTCTGGCTCCAAGTCTGGCGCCTCGGCCTCCCTGGCCATCTCTGGGCTCCAGGCTGAAGATGAGGCTGAATATTACTGCCAGTCCTATGACAAGAGCCTGAGTGTCCTTTATGTCCTCGGAACTGGGACCAAGGTCACCGTCCT	﻿QSVLTQPPSVSGAPEQRVTISCTGSSSNIGAGHDVHWYQQLPGTAPKLLIYNNNNRPSGVPDRFSGSKSGASASLAISGLQAEDEAEYYCQSYDKSLSVLYVLGTGTKVTV		3.36		25.9506	218.32
			C987		12m		clone		IGHV4-59	IGHJ5	﻿CAGGTGCAGCTGCAGGAGTCGGGCCCAGGACTGGTGAAGCCTTCGGAGACCCTGTCCCTCACCTGTAATGTCTCTGGTGACATCATCAATAAATATTACTGGAGCTGGATCCGGCAGTCCCCAGGGAAGGGACTGGAGTGGATTGGATACATCTACTATAGTGGGACCACCTACTACAATCCCTCCCTCAAGAGTCGAGTCACCATGTCCGTGGGCACGTCCAAGCAGCAGTTCTCCTTGAGGCTGACCTCTGTGACCGCCGCAGATACGGCCGTCTATTACTGTGCGAGGATGTTATCTACGGAGTGGTCATTTAACTGGTTCGACCCCTGGGGCCCGGGAACCCTGGTCACCGTCTCCTCAG	﻿QVQLQESGPGLVKPSETLSLTCNVSGDIINKYYWSWIRQSPGKGLEWIGYIYYSGTTYYNPSLKSRVTMSVGTSKQQFSLRLTSVTAADTAVYYCARMLSTEWSFNWFDPWGPGTLVTVSS		IGLV3-1	IGLJ1	﻿TCCTATGAGCTGACTCAGCCACCCTCAGTGTCCGTGTCCCCAGGACAGGCAGCCAGCATCACCTGCTCTGGAGATAAATTGGGGGATAAATTTGCTTGCTGGTATCAGCAGAAGCCAGGCCAGTCCCCTGTCCTGGTCATCTATCAAAATGACAAGCGGCCCACAGGGATCCCTGAGCGATTCTCTGGCTCCAACTCTGGGAACACAGCCACTCTGACCATCAGCGGGACCCAGGCTATGGATGAGGCTGACTATTTCTGCCAGGCGTGGGACAGTACCAGTGCTTCTGTCTTCGGAACTGGGACCAAAGTCACCGTCCTAG	﻿SYELTQPPSVSVSPGQAASITCSGDKLGDKFACWYQQKPGQSPVLVIYQNDKRPTGIPERFSGSNSGNTATLTISGTQAMDEADYFCQAWDSTSASVFGTGTKVTVL		3.11		9.16075	50.9567
			C989		12m		clone		IGHV1-69	IGHJ6	﻿CAGGTGCAGCTGGTGCAGTCTGGGCCTGAGGTGAAGAAGCCTGGGTCCTCGGTGAAAGTCTCCTGCAAGGCCTCTGGAGGCAACTTCAACAGTTATACCATCACCTGGGTGCGACAGGCCCCTGGACATGGGCTTGAGTGGATGGGACGGATCATCCCTACTCTTGGTGTAGCAAACTACGCACTGAACTTCCAGGACAGAATCACGATTACCGCGGACAAATCCACGAGCACAGCCTACATGGACCTGAGCAGCCTGAGATCTGAGGACACGGCCGTTTATTATTGTGCGAGAGAGACTGGATACAGTGGATTCCTTGCCGTCGCCTACATGGACGTCTGGGGCAATGGGACCACGGTCACCGTCTCCTCA	﻿QVQLVQSGPEVKKPGSSVKVSCKASGGNFNSYTITWVRQAPGHGLEWMGRIIPTLGVANYALNFQDRITITADKSTSTAYMDLSSLRSEDTAVYYCARETGYSGFLAVAYMDVWGNGTTVTVSS		IGLV1-40	IGLJ2	﻿CAGTCTGTGCTGACGCAGCCGCCCTCAGTGTCTGGGGCCCCAGGGCAGAGGGTCACCATCTCCTGCACCGGGAGCAGTTCCAATGTCGGGGCAGGTTATGATGTACACTGGTACCAACAACTTCCAGGGACAGCCCCCAAACTCCTCATCTATCGTAATAATAATCGGCCCTCCGGGGTCCCTGACCGATTCTCTGGCTCCAAGTCTGGCTCCTCAGCCTCCCTGGACATCACTGGGCTCCAGGCTGAGGATGAGGCTGATTATTACTGCCAGTCCTATGACAGCAGCCTGAGTGATTCGGTTTTCGGCGGAGGGACCAAGCTGACCGTCCT	﻿QSVLTQPPSVSGAPGQRVTISCTGSSSNVGAGYDVHWYQQLPGTAPKLLIYRNNNRPSGVPDRFSGSKSGSSASLDITGLQAEDEADYYCQSYDSSLSDSVFGGGTKLTV		n.d.		41.4526	786.127
			C990		12m		singlet		IGHV3-66	IGHJ6	﻿GAGGTGCAGCTGGTGGAGTCTGGGGGAGGCTTGGTCCGGCCTGGGGGGTCCCTGAGACTCTCCTGTGCAGCCTCTGGATTCACCGTCGGTAGCAATTTCATGAGCTGGGTCCGCCAGGCTCCAGGGAAGGGGCTGGAGTGGGTCTCACTTATTTATAGCGGTGGTGGCACACACTACGCAGAGTCCGTGAAGGGCCGATTCACCATCTCCAGAGACAAATCCAAGAACACACTGTATCTTCAAATGAACAGCCTGAGAGCTGAGGACACGGCTGTTTATTACTGTGCGAACCAGGGCTACTACTATTACATGGACGTCTGGGGCAAAGGGACCACGGTCACCGTCTCC	﻿EVQLVESGGGLVRPGGSLRLSCAASGFTVGSNFMSWVRQAPGKGLEWVSLIYSGGGTHYAESVKGRFTISRDKSKNTLYLQMNSLRAEDTAVYYCANQGYYYYMDVWGKGTTVTVS		IGLV2-14	IGLJ3	﻿CAGTCTGCCCTGACTCAGCCTGCCTCCGTGTCTGGGTCTCCTGGACAGTCGATCACCATCTCCTGCACTGGAACCAGCAGTGACGTTGGTGCTTATAACTATGTCTCTTGGCACCAACACCACCCAGGCAAAGCCCCCAAACTCATTATTTATGACGTCAGTAATCGGCCCTCAGGGGTTTCTAATCGCTTCTCTGGCTCCAAGTCTGGCAACACGGCCTCCCTGACCATCTCTGGGCTCCAGGCTGAGGACGAGGCTGATTATTATTGCACCTCATATACAAACACCACCACTCCCTGGGTGTTCGGCGGAGGGACCAAGTTGACCGTCCTAG	﻿QSALTQPASVSGSPGQSITISCTGTSSDVGAYNYVSWHQHHPGKAPKLIIYDVSNRPSGVSNRFSGSKSGNTASLTISGLQAEDEADYYCTSYTNTTTPWVFGGGTKLTVL		1.85		2.87319	34.7996
			C991		6.2m		singlet		IGHV4-31	IGHJ4	﻿CAGGTGCAGCTGCAGGAGTCGGGCCCAGGACTGGTGAAGCCTTCACAGACCCTGTCCCTCACCTGCACTGTCTCTGGTGGCTCCATCAGCAGTGGTGGTTACTTCTGGAGCTGGATCCGCCAGCACCCAGGGAAGGGCCTGGAGTGGCTTGGGTACAATTATTACACTGGGACCCCCCACTACAATCCGTCCCTCAAGAGTCGCCTTGTTATATCCATAGACACGTCTAAGAACCAGTTCTCCCTGAAGCTGAGCTCTGTGACTGCCGCGGACACGGCCGTGTATTACTGTGCGAGGGGCGACACATTTGGGCGAGGGTATTATTTTGACTACTGGGGCCAGGGAACCCTGGTCACCGTCTCCTCAG	﻿QVQLQESGPGLVKPSQTLSLTCTVSGGSISSGGYFWSWIRQHPGKGLEWLGYNYYTGTPHYNPSLKSRLVISIDTSKNQFSLKLSSVTAADTAVYYCARGDTFGRGYYFDYWGQGTLVTVSS		IGLV3-21	IGLJ3	﻿TCCTATGAGCTGACTCAGCCACCCTCGGTGTCAGTGGCCCCAGGACAGACGGCCAGGATTACCTGTGGGGGAAACAACATTGGAAGTAAAAGTGTGCACTGGTACCAGCAGAAGCCAGGCCAGGCCCCTGTGATGGTCGTCTATGATGATAGTGACCGGCCCTCAGGGATCCCTGAGCGATTCTCTGGCTCCAACTCTGGGGACACGGCCACCCTCACCATCAGCAGGGTCGAAGCCGGGGATGAGGCCGACTATTCCTGTCAGGTGTGGGATAGAAGTAGTGACCATCCTTGGGTGTTCGGCGGAGGGACCAAGCTGACCGTCCTAG	﻿SYELTQPPSVSVAPGQTARITCGGNNIGSKSVHWYQQKPGQAPVMVVYDDSDRPSGIPERFSGSNSGDTATLTISRVEAGDEADYSCQVWDRSSDHPWVFGGGTKLTVL		3.46		50.2143	>1000
			C992		12m		clone		IGHV4-31	IGHJ4	﻿CAGGTGCAGCTGCAGGAGTCGGGCCCAGGACTGGTGAAGCCTTCACAGACCCTGTCCCTCACCTGCACTGTCTCTGGTGGCTCCATCAGCAATGGTGGTTACTTCTGGACCTGGATCCGCCAGCACCCAGTGAAGGGCCTGGAGTGGATTGGATACATCTATTACAGTGGGAGCCCCCACTACAACCCGTCCCTCAAGAGTCGACTTTCCATATCACTGGACACATTTAAGAACCAGTTCTCCCTGAATCTCAGCTCTGTGACTGCCGCGGACACGGCCGTGTATTACTGTGCGAGGGGCGATACATTTGGGCGAGGCTACTACTTTGACTTCTGGGGCCAGGGAACCCTGGTCACCGTCTCCTCA	﻿QVQLQESGPGLVKPSQTLSLTCTVSGGSISNGGYFWTWIRQHPVKGLEWIGYIYYSGSPHYNPSLKSRLSISLDTFKNQFSLNLSSVTAADTAVYYCARGDTFGRGYYFDFWGQGTLVTVSS		IGLV3-21	IGLJ3	﻿TCCTATGAGCTGACTCAGCCACCCTCGGTGTCAGTGGCCCCAGGACAGACGGCCAGGATTACCTGTGGGGGAAACAACATTGGAACTAATAGTATGCACTGGTACCAGCAGAAGCCAGGCCAGGCCCCTGTGCTCGTCGTCTTTGATGATAGCGACCGGCCCTCAGGGATCCCTGAGCGCTTCTCTGGCTCCAACTCTGGGAACACGGCCACCCTGACCATCAGCAGGGTCGAAGCCGGGGATGAGGCCGACTATCACTGTCAGGTGTGGGATCGGAGTAGTGACCGTCCTTGGGTGTTCGGCGGAGGGACCAAGCTGACCGTCCTAG	﻿SYELTQPPSVSVAPGQTARITCGGNNIGTNSMHWYQQKPGQAPVLVVFDDSDRPSGIPERFSGSNSGNTATLTISRVEAGDEADYHCQVWDRSSDRPWVFGGGTKLTVL		3.24		33.6524	511.763
			C993		12m		clone		IGHV3-23	IGHJ3	﻿GAGGTGCAGCTGTTGGAGTCTGGGGGAGGCTTGGTACAGCCTGGGGGGTCCCTAAGACTCTCCTGTGCAGCCTCTGGATTCCCCTTTAGCATCTATGCCATGAGCTGGGTCCGCCAGGCTCCTGGGAAGGGGCTGGAGTGGGTCTCAGGTATGCGTGGCACTACTGGTACCACATACTACGCCGACTCCGTGAAGGGCCGGTTCGCCATCTCCAGAGACAATTCCAAGAATATGCTGCATCTGCAAATGAACAGCCTGAGAGCCGAGGACACGGCCGTGTATTACTGTGCGAAAAGTGACCACGGTGACTACGTCATTGGCGCTTTTGATATCTGGGGCCAGGGGACAATGGTCACCGTCTCTTCAG	﻿EVQLLESGGGLVQPGGSLRLSCAASGFPFSIYAMSWVRQAPGKGLEWVSGMRGTTGTTYYADSVKGRFAISRDNSKNMLHLQMNSLRAEDTAVYYCAKSDHGDYVIGAFDIWGQGTMVTVSS		IGLV2-8	IGLJ3	﻿CAGTCTGCCCTGACTCAGCCTCCCTCCGCGTCCGGGTCTCCTGGACAGTCAGTCACCATCTCCTGCACTGGAACCAGCGGAGACGTTGGTGGTTATAACTATGTCTCCTGGTACCAACAGCACCCAGGCAAAGCCCCCAAACTCATGATTTATGAGGTCAGTAAGCGGCCCTCAGGGGTCCCTGATCGCTTCTCTGGCTCCAAGTCTGGCAACACGGCCTCCCTGACCGTCTCTGGGCTCCAGGCTGAAGATGAGGCTGATTATTACTGCAACTCATATGCAGGCAGCAACAATTGGGTGTTCGGCGGAGGGACCAAGCTGACCGTCCTAG	﻿QSALTQPPSASGSPGQSVTISCTGTSGDVGGYNYVSWYQQHPGKAPKLMIYEVSKRPSGVPDRFSGSKSGNTASLTVSGLQAEDEADYYCNSYAGSNNWVFGGGTKLTVL		2.29		8.9413	43.8247
			C994		12m		singlet		IGHV4-4	IGHJ4	﻿CAGGTGCAGCTGCAGGAGTCGGGCCCAGGACTGGTGAAGCCTTCGGGGACCCTGTCCCTCACCTGCGCTGTCTCTGGTGTCTCCATCAGCAATACTAACTGGTGGAATTGGGTCCGCCAGCCCCCCGGGAAGGGGCTGGAGTGGATTGGGGAAATCTATCATACTGGGAGCGCTAGATACAACCCGTCCCTCAGGAGTCGAGTCACCATATCAGTTGACAAGTCGAAGAATCAGTTCTCCCTGAGGCTGAACTCAGCGACCGCCGCGGACACGGCCATATATTACTGTGCGAGAGCCCAGACTCCTGAGTTCGGGGAGTTGTTATACTGGGGCCAGGGAGCCCTGGTCACCGTCTCCTCAG	﻿QVQLQESGPGLVKPSGTLSLTCAVSGVSISNTNWWNWVRQPPGKGLEWIGEIYHTGSARYNPSLRSRVTISVDKSKNQFSLRLNSATAADTAIYYCARAQTPEFGELLYWGQGALVTVSS		IGKV1-39	IGKJ2	﻿GACATCCAGATGACCCAGTCTCCATCCTCCCTGTCTGCATCTGTTGGAGACAGAGTCACCATCACTTGCCGGGCAAGTCAGAGCATTACCGACCATTTAAATTGGTATCAGCAAAAACCAGGGAAAGCCCCCAAACTCCTGATCTATGCTGCATCCAGTTTGCAAACTGGAGTCCCATCCAGGTTCAGTGGCAGTGGATCTGAGACAGATTTCACTCTCACCATCAGCACTCTGCAGCCTGAAGATTTTGCGACTTACTACTGTCAACAGAGTTACGGTCCCCCGACGTACTCTTTTGGCCAGGGGACCAAGCTGGAGATCAAAC	﻿DIQMTQSPSSLSASVGDRVTITCRASQSITDHLNWYQQKPGKAPKLLIYAASSLQTGVPSRFSGSGSETDFTLTISTLQPEDFATYYCQQSYGPPTYSFGQGTKLEIK		2.09		86.7082	>1000
			C995		12m		singlet		IGHV3-49	IGHJ4	﻿GAGGTGCAGCTGGTGGAGTCTGGGGGGGGCTTGATACAGCCTGGGCGGTCCCTGAGACTCTCCTGTACAGCTTCTGGATTCTCCGTCGGTGATTACGCTATGAGCTGGTTCCGCCAGGCTCCAGGAAAGGGGCTGGAGTGGGTAGGTTTCCTTAGAAATCAACATTACGGTGGGACAGCAGAATACGCCGCGTCTGTGAAAGGCAGATTCTCCATCTCTACAGACGCTTCCAAAAACATCGTCTATCTGCAAATGGACAGCCTGAAAACCGAGGACACAGCCGTTTATTACTGTGCTCGAAACGACCGTTATATTGTGATAGTTCCAGCTGAAATGCTCTACTGGGGCCAGGGAACCCTGGTCACCGTCTCCTCAG	﻿EVQLVESGGGLIQPGRSLRLSCTASGFSVGDYAMSWFRQAPGKGLEWVGFLRNQHYGGTAEYAASVKGRFSISTDASKNIVYLQMDSLKTEDTAVYYCARNDRYIVIVPAEMLYWGQGTLVTVSS		IGKV3-15	IGKJ5	﻿GAAATAGTGATGACGCAGTCTCCAGCCACCCTGTCTGTGTCTCCAGGGGAAAGAGCCACCCTCTCCTGCAGGGCCACTGAGAGTGTTTACAGCAATTTGGCCTGGTATCAGCAGAAACCTGGCCAGGCTCCCAGGCTCCTCATGTATGATGCATCCACCAGGGCCCCTGGTATCCCAGCCAGGTTCAGTGGCAGTGGGTCTGGGACAGAGTTCACTCTCACCATCAGCAGCCTGCAGTCTGAAGATTTTGCAACTTATTACTGTCAACAATATAGTAACTGGCCTCCGATCACCTTCGGCCAAGGGACACGACTGGAGATTAAAC	﻿EIVMTQSPATLSVSPGERATLSCRATESVYSNLAWYQQKPGQAPRLLMYDASTRAPGIPARFSGSGSGTEFTLTISSLQSEDFATYYCQQYSNWPPITFGQGTRLEIK		3.79		5.99039	37.6093
			C996		12m		clone		IGHV3-13	IGHJ3	﻿GAGGTGCAGCTGGTGGAGTCTGGGGGAGGCTTGGTCCAACCGGGGGGGTCCCTGAGACTCTCCTGTGTAGCCTCTGGATTCACCTCCACTAACTACGACATGCACTGGGTCCGCCAGGCTCCAGGAAGAGGTCTGCAGTGGGTCTCGAGTATTGGAACTGCTGGTGACACATACTATCCAGGCTCCGTGAGGGGCCGATTCACCATCTCCAGAGAAAATGCCAAGAACTCCTTGGATCTTCAAATGAACAGCCTGAGAGTCGGGGACACGGCTGTTTATTACTGTGCAAGAGGCCAGAGGGGGTATTACGATAGAAGTGGTTATTACTGGGGTTGGAGGGCTTTTGATATTTGGGGCCAAGGGACAATGGTCACCGTCTCTTCAG	﻿EVQLVESGGGLVQPGGSLRLSCVASGFTSTNYDMHWVRQAPGRGLQWVSSIGTAGDTYYPGSVRGRFTISRENAKNSLDLQMNSLRVGDTAVYYCARGQRGYYDRSGYYWGWRAFDIWGQGTMVTVSS		IGLV3-21	IGLJ3	﻿TCCTATGAGCTGACTCAGCCACCCTCGGTGTCAGTGGCCCCAGGACAGACGGCCAGGATTACCTGTGGGGGGAACAACATTGGAAATAAAAGTGTGTATTGGTACCAGCAGAAGCCAGGCCAGGCCCCTGTTCTGGTCGTCTATGATGATAGCGGCCGGCCCTCAGGGATCCCTGAGCGATTCTCTGGCTCCAACTCTGCGAACACGGCCACCCTGACCATCAGCAGGGTCGAAGCCGGGGATGAGGCCGACTATTACTGTCAGGTGTGGGATAATAATAGTGATCAGTTCGGCGGAGGGACCAAGCTGACCGTCCTAG	﻿SYELTQPPSVSVAPGQTARITCGGNNIGNKSVYWYQQKPGQAPVLVVYDDSGRPSGIPERFSGSNSANTATLTISRVEAGDEADYYCQVWDNNSDQFGGGTKLTVL		3.07		38.9768	338.753
	COV72		C997		12m		singlet		IGHV3-23	IGHJ6	﻿GAGGTGCAGCTGTTGGAGTCTGGGGGAGGCTTGGTACAGCCTGGGGGGTCCCTGAGACTCTCCTGTGCAGCCTCTGGATTCACCTTTAGCAAGGATGCCATGAGCTGGGTCCGCCAGGCTCCAGGGAAGGGGCTGGAGTGGGTCTCAACTGTAACTGGTAGTGGTACTAACACATACTACGCAGACTCCGTGAAGGGCCGGTTCACCATCTCCAGAGACAATTCCAATAACACGCTGTATCTGCAAATGAACAGCCTGAGAGCCGAGGACACGGCCGTATATTACTGTGCGAACCACCCTTTAGGAGCAGCCGAGGGCTACTACTACTACTACATGGACGTCTGGGGCAAAGGGACCACGGTCACCGTCTCCTCA	﻿EVQLLESGGGLVQPGGSLRLSCAASGFTFSKDAMSWVRQAPGKGLEWVSTVTGSGTNTYYADSVKGRFTISRDNSNNTLYLQMNSLRAEDTAVYYCANHPLGAAEGYYYYYMDVWGKGTTVTVSS		IGKV3-20	IGKJ4	﻿GAAATTGTGTTGACGCAGTCTCCAGGCACCCTGTCTTTGTCTCCAGGGGAAAGAGGCACCCTCTCCTGCAGGGCCAGTCAGCGTGTTCCCAGCAGCCAGTTAGCCTGGTACCAGCAGAAATCTGGCCAGGCTCCCAGGCTCCTCATCTATGGTGCATCTAGCAGGGCCAGTGGCATCCCAGACAGGTTCAGTGGCAGTGGGTCTGGGACAGACTTCACTCTCAACATCAGCAGACTGGAGCCTGAAGATTTTGCAGTGTATTACTGTCAGCAGTATGGTAGCTTAAGGGCGCTCACTTTCGGCGGAGGGACCAAGGTGGAGATCAAAC	﻿EIVLTQSPGTLSLSPGERGTLSCRASQRVPSSQLAWYQQKSGQAPRLLIYGASSRASGIPDRFSGSGSGTDFTLNISRLEPEDFAVYYCQQYGSLRALTFGGGTKVEIK		3.49		7.41801	96.3973
			C998		6.2m		singlet		IGHV1-46	IGHJ3	﻿CAGGTGCAGCTGGTGCAGTCTGGGGCTGAGGTGAAGAAGCCTGGGGCCTCAGTGAAAGTTTCCTGCAAGACATCTGGATACACCTTCATTAGTTACTATATACACTGGGTGCGACAGGCCCCTGGACAAGGGCTTGAGTGGATGGGAATAATCAACCCTGATGGTGATAACACAAACTACGCACAGAAGTTCCAGGGCAGAGTCACCATGACCAGGGACACGTCCACGAGCACAGTCTACATGGAGCTGAGTAGTCTGAGATTTGAGGACACGGCCGTGTATTACTGTGCGAGAGGGGGTGCGATACCAGCCCTAAGGACTGCTTTTGATATCTGGGGCCAAGGGACAATGGTCACCGTCTCTTCAG	﻿QVQLVQSGAEVKKPGASVKVSCKTSGYTFISYYIHWVRQAPGQGLEWMGIINPDGDNTNYAQKFQGRVTMTRDTSTSTVYMELSSLRFEDTAVYYCARGGAIPALRTAFDIWGQGTMVTVSS		IGKV1-5	IGKJ2	﻿GACATCCAGATGACCCAGTCTCCTTCCACCCTGTCTGCATCTGTAGGAGACAGAGTCACCATCACTTGCCGGGCCAGTCAGAGTATTAGTAACTGGTTGGCCTGGTATCAGCAGAAACCAGGGAAAGCCCCTAAGCTCCTGATCTATAAGGCGTCTAGTTTAGAGAGTGGGGTCCCATCAAGGTTCAGCGGCAGTGGATCTGGGACAGAATTCACTCTCACCATCAGCAGCCTGCAGCCTGATGATTTTGCAACTTATTACTGCCAAGAGTATAATAGTTATTATTTTGGCCAGGGGACCAAGCTGGAGATCAAAC	﻿DIQMTQSPSTLSASVGDRVTITCRASQSISNWLAWYQQKPGKAPKLLIYKASSLESGVPSRFSGSGSGTEFTLTISSLQPDDFATYYCQEYNSYYFGQGTKLEIK		2.51		>1000	>1000
			C999		12m		clone		IGHV1-46	IGHJ3	﻿CAGGTGCAGCTGGTGCAGTCAGGGGCTGAAGTGAGGAGGCCTGGGGCCTCAGTGAAAGTTTCCTGTAAGGCATCTGGATACACCCTCACCCACTACTATATACACTGGGTGCGACAGGCCCCTGGACAAGGGCTTGAGTGGGTGGGAATAATCAACCCTGATGGTGATAACACAAACTACGCACAGAAGTTCCAGGGCAGAGTCACCATGACTAGGGACACGTCCACGAGCACAGTCTACATGGAACTGAGCAGCCTGAGATCTGAGGACACGGCCATATTTTACTGTGCGAGAGGGGGTGCAATACCAGCCCTAAGGTCTGCTTTTGATATCTGGGGCCAGGGGACAATGGTCACCGTCTCTTCAG	﻿QVQLVQSGAEVRRPGASVKVSCKASGYTLTHYYIHWVRQAPGQGLEWVGIINPDGDNTNYAQKFQGRVTMTRDTSTSTVYMELSSLRSEDTAIFYCARGGAIPALRSAFDIWGQGTMVTVSS		IGKV1-5	IGKJ2	﻿GACATCCAGATGACCCAGTCCCCTTCCACCCTGTCTGCATCTGTAGGAGACAGAGTCACCATCACTTGCCGGGCCAGTCAGAGTATTAATAACTGGTTGGCCTGGTATCAGCAGAAACCAGGGAAAGCCCCTAAGCTCCTGATCTATAAGGCGTCTACTTTAGAAAGTGGGGTCCCATCAAGGTTCAGCGGCAGTGGATCTGGGACAGAATTCACTCTCACCATCAGCAGCCTGCAGCCTGATGATTTTGCAACTTATTACTGCCAACAGTATAATAGTTATTTTTTTGGCCAGGGGACCAAGCTGGAGATCAAAC	﻿DIQMTQSPSTLSASVGDRVTITCRASQSINNWLAWYQQKPGKAPKLLIYKASTLESGVPSRFSGSGSGTEFTLTISSLQPDDFATYYCQQYNSYFFGQGTKLEIK		2.68		>1000	>1000
			C1000		6.2m		singlet		IGHV4-30	IGHJ4	﻿CAGGTGCAGCTGCAGGAGTCGGGCCCAGGACTGGTGAAGCCTTCACAGACCCTGTCCCTCAGTTGTACTGTCTCTGGTGGCTCCATCAGTAGTGATGATTACTACTGGAGTTGGATCCGCCAGCCCCCAGGGAAGGGCCTGGAGTGGATTGGGTACATCTACTACAGTGGGAGCACGTACTACAATTCGTCCCTCAAGAGTCGAGTTAGCATATCAGTAGACACGTCCAAGAACCAGTTCTCCCTGAAGCTGAGCTCTGTGACTGCCGCAGACACGGCCGTGTATTACTGTGCCAGATGGAAAAGATGGCTACAGTTCCTTTATTTTGACTATTGGGGCCAGGGAACCCTGGTCACCGTCTCCTCAG	﻿QVQLQESGPGLVKPSQTLSLSCTVSGGSISSDDYYWSWIRQPPGKGLEWIGYIYYSGSTYYNSSLKSRVSISVDTSKNQFSLKLSSVTAADTAVYYCARWKRWLQFLYFDYWGQGTLVTVSS		IGLV2-11	IGLJ2	﻿CAGTCTGCCCTGACTCAGCCTCGCTCAGTGTCCGGGTCTCCTGGACAGTCAGTCACCATCTCCTGCACTGGAACCAGCAGTGATGTTGGTGGTTATAGCTTTGTCTCCTGGTACCAACAGCACCCAGGCAAAGCCCCCAAAGTCCTGATTTATGATGTCGATAAGCGGCCCTCAGGGGTCCCTGATCGCCTCTCTGGCTCCAAGTCTGGCAACACGGCCTCCCTGACCATCTCTGGGCTCCAGGCTGAGGATGAGGCTGATTATTACTGCTGCTCATATGCAGGCAGCTACACTTTGATATTCGGCGGAGGGACCAAGCTGACCGTCCTAG	﻿QSALTQPRSVSGSPGQSVTISCTGTSSDVGGYSFVSWYQQHPGKAPKVLIYDVDKRPSGVPDRLSGSKSGNTASLTISGLQAEDEADYYCCSYAGSYTLIFGGGTKLTVL		3.2		>1000	>1000
			C1001		12m		clone		IGHV4-30	IGHJ4	﻿CAGGTGCAGCTGCAGGAGTCGGGCCCAGGACTGGTGAAGCCTTCACAGACCCTGTCCCTCACCTGCACTGTCTCTGGTGGCTCCATCAGCAGTGGTGATTACTACTGGACTTGGATCCGCCAGCCCCCAGGGAAGGGCCTGGAGTGGATTGGGTACATCTTTTACAGTGGGATCACCTACTACAGCCCGTCCCTCAAGAGTCGACTTACCATGTCAATAGACACGTCCAAGAGCCAATTCTCCCTGAACCTGAGCTCTGTCACTGCCGCAGACACGGCCGTGTATTACTGTGCCAGATGGAAAAGATTGCTACAATCCCTTCACTTTGACTACTGGGGCCAGGGAATCCTGGTCACCGTCTCCTCAG	﻿QVQLQESGPGLVKPSQTLSLTCTVSGGSISSGDYYWTWIRQPPGKGLEWIGYIFYSGITYYSPSLKSRLTMSIDTSKSQFSLNLSSVTAADTAVYYCARWKRLLQSLHFDYWGQGILVTVSS		IGLV2-11	IGLJ2	﻿CAGTCTGCCCTGACTCAGCCTCGCTCAGTGTCCGGGTCTCCTGGACAGTCAGTCACCATTTCCTGCACTGGAACTAGCAGTGATGTTGGTAGTTATGACTATGTCTCCTGGTACCAACAGCACCCAGGCAAAGCCCCCAAAGTCATGATTTATGGTGTCGATGAGCGGCCCTCAGGGGTCCCTCATCGCTTCTCTGGCTCCAAGTCTGGCAACACGGCCTCCCTGACCATCTCTGGGCTCCAGGCTGACGATGAAGCTGATTATTTCTGCTGCTTTTATGCAGGCAGCTACACTTTATTATTCGGCGGAGGGACCAAGGTGACCGTCCTAG	﻿QSALTQPRSVSGSPGQSVTISCTGTSSDVGSYDYVSWYQQHPGKAPKVMIYGVDERPSGVPHRFSGSKSGNTASLTISGLQADDEADYFCCFYAGSYTLLFGGGTKVTVL		3.23		>1000	>1000
			C1002		12m		singlet		IGHV3-66	IGHJ4	﻿GAGGTGCAGCTGGTGGAGTCTGGGGGAGGGTTGGTCCAGCCGGGGGGGTCCCTGAGACTCTCCTGTGCAGCCTCTGAATTCATCGTTAGTAGCAACTACATGACCTGGGTCCGCCAGGCTCCAGGGAAGGGGCTGGAGTGGGTCTCAATTATGTATCCCGGTGGTTCCACATTCTACGCAGACTCCGTGAAGGGCAGATTCACCATCTCCAGAGACAATTCCAAGAACACGTTGTATCTTCAAATAAATAGGCTGAGAGCCGAGGACACGGCTGTATATTACTGTGCGAGAGATATAGCAGGTCGTCTTGACTACTGGGGCCAGGGAACCCTGGTCACCGTCTCCTCAG	﻿EVQLVESGGGLVQPGGSLRLSCAASEFIVSSNYMTWVRQAPGKGLEWVSIMYPGGSTFYADSVKGRFTISRDNSKNTLYLQINRLRAEDTAVYYCARDIAGRLDYWGQGTLVTVSS		IGKV1-33	IGKJ4	﻿GACATCCAGATGACCCAGTCTCCATCCTCCCTGTCTGCATCTGTAGGCGACAGAGTCACCATCACTTGCCAGGCGAGTCAGGACATCAACAACTATTTAAATTGGTATCAGCAGAAACCAGGGAAAGCCCCTAAGCTCCTGATCTACGATGCATCTAATTTGGAAACAGGGGTCCCATCAAGGTTCAGTGGAAGTGGATCTGGGACAGATTTTTCTTTCACCATCAGCAGCCTGCAGCCTGAAGATATTGCAACATATTACTGTCAACAGTATGATAATCTCTCTCGACTCACTTTCGGCGGAGGGACCAAGGTGGAAATCAAAC	﻿DIQMTQSPSSLSASVGDRVTITCQASQDINNYLNWYQQKPGKAPKLLIYDASNLETGVPSRFSGSGSGTDFSFTISSLQPEDIATYYCQQYDNLSRLTFGGGTKVEIK		0.83		22.5127	72.6233
			C1003		12m		singlet		IGHV3-30	IGHJ3	﻿CAGGTGCAGCTGGTGGAGTCTGGGGGAGGCGTGGTCCAGCCTGGGAGGTCCCTGAGACTCTCCTGTGCAGCCTCTGGATTCGCCTTCAGTAGCTATGGCATGAACTGGGTCCGCCAGGCTCCAGGCAAGGGGCTGGAGTGGGTGACTACTGTATCATCTGATGGAAATGTTAATTACTATATAGATTCCGTGAAGGGCCGATTCACCATCTCCAGAGACAATTCCAAGAACACGCTGTATCTGCAAATGAACAGCCTGAGAGGTGACGACACGGCAGTGTATTACTGTGCGAAAGGCCCCCGGTTTGGCTGGAGCTATAGAGGGGGGTCTGGTTTTGATATCTGGGGCCAAGGGACAATGGTCACCGTCTCTTCAG	﻿QVQLVESGGGVVQPGRSLRLSCAASGFAFSSYGMNWVRQAPGKGLEWVTTVSSDGNVNYYIDSVKGRFTISRDNSKNTLYLQMNSLRGDDTAVYYCAKGPRFGWSYRGGSGFDIWGQGTMVTVSS		IGKV1-33	IGKJ5	﻿GACATCCAGATGACCCAGTCTCCATCCTCCCTGTCTGCATCTGTAGGAGACAGAGTCACCATCACGTGCCAGGCGAGTCAGGACATTAGCAACTATTTAAATTGGTATCAGCAGAAGCCAGGGAAAGCCCCTAAGCTCCTGATCTACGATGCATCCAATTTGGAAACAGGGGTCCCATCAAGGTTCAGTGGGAGTGGATCTGGGACAGATTTTACTTTCACCATCACCAGCCTGCAGCCTGAAGACATTGCAACATATTACTGTCAACAGTATGATAATCTCCCGATCACCTTCGGCCAAGGGACACGACTGGAGATTAAAC	﻿DIQMTQSPSSLSASVGDRVTITCQASQDISNYLNWYQQKPGKAPKLLIYDASNLETGVPSRFSGSGSGTDFTFTITSLQPEDIATYYCQQYDNLPITFGQGTRLEIK		1.82		2.40146	19.4334
			C1004		6.2m		singlet		IGHV1-46	IGHJ6	﻿CAGGTGCAGCTGGTGCAGTCTGGGGCTGAGGTGAAGAAGCCTGGGGCCTCAGTGAAGGTTTCCTGCAAGGCATCTGGATACTCCTTCGCCACCTACTATATACACTGGGTGCGACAGGCCCCTGGACAAGGGCTTGAGTGGATGGGAATAATCGACCCTAGTGGTGGTAGTACAAACTACGCACAGAAGTTCCAGGGCAGAGTCACCATGACCAGGGACACGTCGACGAGCACAGTGTACTTGGAGCTGAGCAGCCTGAGATCCGAGGACACGGCCGTCTATTACTGTGCGAGAGCCGACACCCCCATAGTAGTGGATACTACGTCCTATTTCTACTACATGGACGTCTGGGGCAAAGGGACCACGGTCACCGTCTCCTCA	﻿QVQLVQSGAEVKKPGASVKVSCKASGYSFATYYIHWVRQAPGQGLEWMGIIDPSGGSTNYAQKFQGRVTMTRDTSTSTVYLELSSLRSEDTAVYYCARADTPIVVDTTSYFYYMDVWGKGTTVTVSS		IGLV2-14	IGLJ2	﻿CAGTCTGCCCTGACTCAGCCTGCCTCCGTGTCTGGGTCTCCTGGACAGTCGATCACCATCTCCTGCACTGGAACCAGCAGGGACATTGGTTTTTATAAGTATGTCTCCTGGTACCAACAACACCCAGGCAAAGCCCCCAAACTCATCATTTATGATGTCACTAATCGGCCCTCAGGGGTTTCTAATCGCTTCTCTGGCTCCAAGTCTGGCAACACGGCCTCCCTGACCATCTCTGGGCTCCAGGCTGAGGACGAGGCTCATTATCACTGCAGCTCATATTCAACCGCCTACGTCCATGTGCTTTTCGGCGGAGGGACCAGGCTGACCGTCCTAG	﻿QSALTQPASVSGSPGQSITISCTGTSRDIGFYKYVSWYQQHPGKAPKLIIYDVTNRPSGVSNRFSGSKSGNTASLTISGLQAEDEAHYHCSSYSTAYVHVLFGGGTRLTVL		n.d.		3.90357	45.9505
			C1006		6.2m		singlet		IGHV1-69	IGHJ5	﻿CAGGTGCAGCTGGTGCAGTCTGGGGCTGAAGTGAGGAAGCCTGGGTCCTCGGTGAAGGTCTCCTGCAAGGCTTCTGGAGGCCCCTTCGACCAGTATACTTTCAGTTGGGTGCGACAGGCCCCTGGACAAGGACTTGAGTGGATGGCAAGGATCACACCTGTTGTTGATTTGACAAATTACGCACAGAAATTCCAGGGCAGAATCACCATTATCACGGACAAATCTACGAGCACAGCCTACATGGAGCTGAGCAGCCTGAGATCTGAGGACACGGCCATATATTACTGTGCGACTCCCCTCAATGATTACTATGCTTCGGGGAACCTCGGCCTCTGGGGCCAGGGAACCCTGGTCACCGTCTCCTCAG	﻿QVQLVQSGAEVRKPGSSVKVSCKASGGPFDQYTFSWVRQAPGQGLEWMARITPVVDLTNYAQKFQGRITIITDKSTSTAYMELSSLRSEDTAIYYCATPLNDYYASGNLGLWGQGTLVTVSS		IGKV1-16	IGKJ4	﻿GACATCCAGATGACCCAGTCTCCATCCTCACTGTCTGCATCTATAGGAGACAGAGTCACCATCACTTGTCGGGCGAGTCAGGGCATTAGCTATTATCTAGCCTGGTTTCAGCAGAAACCAGGGGAAGCCCCTAGGTCCCTGATCTATGATGCATCCAGTTTGCAAAGTGGGGTCCCATCAAAGTTCAGCGGCAGTGGATCTGGGACAGATTTCACTCTCACCATCAGCAGCCTGCAGCCTGAAGATTCTGCAACTTATTACTGCCAACAATATAATAGTTACCCTCTCACTTTCGGCGGAGGGACCAAGGTGGAAATCAAAC	﻿DIQMTQSPSSLSASIGDRVTITCRASQGISYYLAWFQQKPGEAPRSLIYDASSLQSGVPSKFSGSGSGTDFTLTISSLQPEDSATYYCQQYNSYPLTFGGGTKVEIK		2.04		42.0118	418.896
			C1007		12m		singlet		IGHV1-69	IGHJ4	﻿CAGGTGCAGCTGGTGCAGTCTGGGTCTGAGATGAAGAAGCCTGGGTCCTCGGTGAAGGTCTCCTGCAAGGCTGCAGGAGGCACCCTCAACACCCATACTTTCAGTTGGGTGCGACAGGCCCCTGGACAAGGACTTGAGTGGATGGGAAGGATCACACCCACTGTAGATCTGACAAATTACGCACAGAAGTTCCAGGGCAGAATCACGATTACCGCGGACACATCCACGAACACAGCCTACCTGGAACTGAGGCGTCTGAGATCTGAGGACACGGCCATTTATTACTGTGCGACTCCCCTCAATGACTATTATGCTTCGGGAAACCTCGGCTTATGGGGCCAGGGAACCCTGGTCACCGTCTCCTCAG	﻿QVQLVQSGSEMKKPGSSVKVSCKAAGGTLNTHTFSWVRQAPGQGLEWMGRITPTVDLTNYAQKFQGRITITADTSTNTAYLELRRLRSEDTAIYYCATPLNDYYASGNLGLWGQGTLVTVSS		IGKV1-16	IGKJ4	﻿GACATCCAGATGACCCAGTCTCCATCCTCACTGTCTGCATCTATAGGAGACACAGTCACCATCACTTGTCGGGCGAGTCAGGGTATTAGTTATTATCTAGCCTGGTTTCAGCGGAAACCAGGGAAAGCCCCTAAGTCCCTGATCTATGATGCATCCAGCTTGCAAAGTGGGGTCCCATCAAAGTTCAGCGGTAGTGGATCCGGGACAGATTTCACTCTCACCATCAGCAGCCTGCAGCCTGAAGATTCTGCAACTTATTACTGCCAACAATATAGTACTTATCCTCTCACTTTCGGCGGAGGGACCAAGGTGGAAATCAAAC	﻿DIQMTQSPSSLSASIGDTVTITCRASQGISYYLAWFQRKPGKAPKSLIYDASSLQSGVPSKFSGSGSGTDFTLTISSLQPEDSATYYCQQYSTYPLTFGGGTKVEIK		3.22		52.2178	225.873
			C1008		1.3m		singlet		IGHV3-53	IGHJ4	﻿GAGGTGCAGCTGGTGGAGTCTGGAGGAGGCTTGATCCAGCCTGGGGGGTCCCTGAGACTCTCCTGTGCAGCCTCTGGGTTCACCGTCAGTAGCAACTACATGAGCTGGGTCCGCCAGGCTCCAGGGAAGGGGCTGGAGTGGGTCTCAGTTATTTATAGCGGTGGTAGCACATACTACGCAGACTCCGTGAAGGGCCGATTCACCATCTCCAGAGACAATTCCAAGAACACGCTGTATCTTCAAATGAACAGCCTGAGAGCCGAGGACACGGCCGTGTATTACTGTGCGAGAGTTGTGGGTTACGATTTTTGGAGTGGTTATGATGGAGGTTACTTTGACTACTGGGGCCAGGGAACCCTGGTCACCGTCTCCTCAG	﻿EVQLVESGGGLIQPGGSLRLSCAASGFTVSSNYMSWVRQAPGKGLEWVSVIYSGGSTYYADSVKGRFTISRDNSKNTLYLQMNSLRAEDTAVYYCARVVGYDFWSGYDGGYFDYWGQGTLVTVSS		IGLV2-23	IGLJ3	﻿CAGTCTGCCCTGACTCAGCCTGCCTCCGTGTCTGGGTCTCCTGGACAGTCGATCACCATCTCCTGCACTGGAACCAGCAGTGATGTTGGGAGTTATAACCTTGTCTCCTGGTACCAACAGCACCCAGGCAAAGCCCCCAAACTCATGATTTATGAGGTCAGTAAGCGGCCCTCAGGGGTTTCTAATCGCTTCTCTGGCTCCAAGTCTGGCAACACGGCCTCCCTGACAATCTCTGGGCTCCAGGCTGAGGACGAGGCTGATTATTACTGCTGCTCATATGCAGGTAGTAGCACTTGGGTGTTCGGCGGAGGGACCAAGCTGACCGTCCTAG	﻿QSALTQPASVSGSPGQSITISCTGTSSDVGSYNLVSWYQQHPGKAPKLMIYEVSKRPSGVSNRFSGSKSGNTASLTISGLQAEDEADYYCCSYAGSSTWVFGGGTKLTVL		17.23		697.098	>1000
			C1009		12m		singlet		IGHV3-53	IGHJ4	﻿GAGGTGCAGCTGGTGGAGTCTGGAGGAGGCTTGCTCCAGCCTGGAGGGTCCCTGAGACTCTCCTGTGCAGCCTCTGGCTTCAGCGTCAGTAGCAACTACATGACCTGGGTCCGCCAGGCTCCAGGGAAGGGGCTGGAGTGGGTCGCAGCTATTTACAGCGGTGACAGTACATACTACGTAGACTCCGTGAAGGGCCGATTCATCATCTCCAGAGACAATTCCAAGAACACGGTTTATCTTCACTTGAGTAGCCTGAGAGCCGAGGACACGGCCGTATATTACTGTGCGAGACTTGTGGGTTACGATTTTCGGAGTGGTTCTGATGGCGGTTATTTTGACTACTGGGGCCACGGAACCCTGGTCACCGTCTCCTCAG	﻿EVQLVESGGGLLQPGGSLRLSCAASGFSVSSNYMTWVRQAPGKGLEWVAAIYSGDSTYYVDSVKGRFIISRDNSKNTVYLHLSSLRAEDTAVYYCARLVGYDFRSGSDGGYFDYWGHGTLVTVSS		IGLV2-23	IGLJ3	﻿CAGTCTGCCCTGACTCAGCCTGCCTCCGTGTCTGGGTCTCCTGGACAGTCGATCACCATCTCCTGCACTGGAACCAGCAGTGATATTGGGAATTATAATCTTGTCTCCTGGTACCAACAGCACCCAGGCAAAGCCCCCAAACTCATGATTTATGACGTCAGTAAGCGGCCCTCAGGAGTTTCTAATCGCTTCTCTGGCTCCAAGTCTGGCAACACGGCCTCCCTGACAATCTCTGGGCTCCAGGCTGAGGACGAGACTGATTATTACTGCTGCTCATATGCAGGTAGCAGCACTTGGGTGTTCGGCGGAGGGACCAAGTTGACCGTCCTAG	﻿QSALTQPASVSGSPGQSITISCTGTSSDIGNYNLVSWYQQHPGKAPKLMIYDVSKRPSGVSNRFSGSKSGNTASLTISGLQAEDETDYYCCSYAGSSTWVFGGGTKLTVL		1.34		5.22525	34.8454
			C1010		1.3m		singlet		IGHV3-30	IGHJ4	﻿CAGGTGCAGCTGGTGGAGTCTGGGGGAGGCGTGGTCCAGCCTGGGAGGTCCCTGAGACTCTCCTGTGCAGCCTCTGGATTCACCTTCAGTAGCTATGCTATGCACTGGGTCCGCCAGGCTCCAGGCAAGGGGCTGGAGTGGGTGGCAGTTATATCATATGATGGAAGCAATAAATACTACGCAGACTCCGTGAAGGGCCGATTCACCATCTCCAGAGACAATTCCAAGAACACGCTGTATCTGCAAATGAACAGCCTGAGAGCTGAGGACACGGCTGTGTATTACTGTGCGAAAAAGGGTCAACCATATTGTGGTGGTGATTGCTATTTCTACTACTTTGACTACTGGGGCCAGGGAACCCTGGTCACCGTCTCCTCAG	﻿QVQLVESGGGVVQPGRSLRLSCAASGFTFSSYAMHWVRQAPGKGLEWVAVISYDGSNKYYADSVKGRFTISRDNSKNTLYLQMNSLRAEDTAVYYCAKKGQPYCGGDCYFYYFDYWGQGTLVTVSS		IGKV1-33	IGKJ5	﻿GACATCCAGATGACCCAGTCTCCATCCTCCCTGTCTGCATCTCTAGGAGACAGAGTCACCATCACTTGCCAGGCGAGTCAGGACATTAGCAACTATTTAAATTGGTATCAGCAGAAACCAGGGAAAGCCCCTAAGCTCCTGATCTACGATGCATCCAATTTGGAAACAGGGGTCCCATCAAGGTTCAGTGGAAGTGGATCTGGGACAGATTTTACTTTCACCATCAGCAGCCTGCAGCCTGAAGATATTGCAACATATTACTGTCAACAGTATGATAATCTCCCTCCGATCACCTTCGGCCAAGGGACACGACTGGAGATTAAAC	﻿DIQMTQSPSSLSASLGDRVTITCQASQDISNYLNWYQQKPGKAPKLLIYDASNLETGVPSRFSGSGSGTDFTFTISSLQPEDIATYYCQQYDNLPPITFGQGTRLEIK		2.45		>1000	>1000
			C1011		12m		singlet		IGHV3-30	IGHJ4	﻿CAGGTGCAGCTGGTGGAGTCGGGGGGAGGCGTGGTCCAGCCTGGGAGGTCCCTGAGACTCTCCTGTGCAGTCTCTGGATTCACCTTCAGTCACTATGCTATGCACTGGGTCCGCCAGGCTCCAGGCAAGGGGCTGGAGTGGGTGGCAGTTATATCATATGATGGAGCCGATAAATACTACGCAGACTCCGTGAGGGGCCGATTCACCATCGCCAGAGACAATTCCAAGAACACTCTGTTTCTGCAAATGAGCAGCCTGCGACCTGAGGACACGGCTGTGTATTACTGTGCGAAAAAGGGTCAACCATATTGCGGTGGTGATTGTCATTTCTACTACCTTGACTACTGGGGCCAGGGAACCCTGGTCACCGTCTCCTCAG	﻿QVQLVESGGGVVQPGRSLRLSCAVSGFTFSHYAMHWVRQAPGKGLEWVAVISYDGADKYYADSVRGRFTIARDNSKNTLFLQMSSLRPEDTAVYYCAKKGQPYCGGDCHFYYLDYWGQGTLVTVSS		IGKV1-33	IGKJ5	﻿GACATCCAGATGACCCAGTCTCCATCCTCCCTGTCTGCATCTGTAGGAGACAGAGTCACCATCACTTGCCAGGCGAGTCAGGACATTAGCAATCATTTAAATTGGTATCAGCAGAAACCAGGGAAAGCCCCTAAGCTCCTGATCTACGATGCATCCAATTTGGAAACAGGGGTCCCCTCAAGGTTCAGTGGAAGTGGATCTGGGACAGATTTTACTTTCACCATCAGCAGCCTGCAGGCTGAAGATATTGCAACATATTACTGTCAACAGTATGATAATCTTCCTCCGATCACCTTCGGCCAAGGGACACGACTGGAGATTAAAC	﻿DIQMTQSPSSLSASVGDRVTITCQASQDISNHLNWYQQKPGKAPKLLIYDASNLETGVPSRFSGSGSGTDFTFTISSLQAEDIATYYCQQYDNLPPITFGQGTRLEIK		1.49		>1000	>1000
			C1012		1.3m		singlet		IGHV1-69	IGHJ5	﻿CAGGTGCAGCTGGTGCAGTCTGGGGCTGAGGTGAAGAAGCCTGGGTCCTCGGTGAAGGTCTCCTGCAAGGCCTCTGGAGGCACCGTCAACAACTATGCTATCAACTGGGTGCGACAGGCCCCTGGACAAGGGCTTGAGTGGATGGGAGGGATCGTCCCTATCTTTGGTACACCAAACTACGCACAGAAGTTCCAGGGCAGAGTCACAATTACCGCGGACGAATCTACGAGCACAGCCTACATGGAGCTGAGCAGCCTGAGATCTGAGGACACGGCCGTGTATTACTGTGCGAAAGTCTCCCTTACACTTCCTATAGCAGCAGCTCCAAGGTTCTGGTTCGACTCCTGGGGCCAGGGAACCCTGGTCACCGTCTCCTCAG	﻿QVQLVQSGAEVKKPGSSVKVSCKASGGTVNNYAINWVRQAPGQGLEWMGGIVPIFGTPNYAQKFQGRVTITADESTSTAYMELSSLRSEDTAVYYCAKVSLTLPIAAAPRFWFDSWGQGTLVTVSS		IGKV3-15	IGKJ4	﻿GAAATAGTGATGACGCAGTCTCCAGCCACCCTGTCTGTGTCTCCAGGGGAAAGAGCCACCCTCTCCTGCAGGGCCAGTCAGAGTGTTAGCAGCCACTTAGCCTGGTACCAGCAGAAACCTGGCCAGGCTCCCAGGCTCCTCATTTATGGTGCATCCACCAGGGCCACTGGTATCCCAGCCAGGTTCAGTGGCAGTGGGTCTGGGACAGAGTTCACTCTCACCATCAGCAGCCTGCAGTCTGAAGATTTTGCAGTTTATTACTGTCAGCAGTATCATAATTGGCCTCCCGCGCTCACTTTCGGCGGAGGGACCAAGGTGGAAATCAAAC	﻿EIVMTQSPATLSVSPGERATLSCRASQSVSSHLAWYQQKPGQAPRLLIYGASTRATGIPARFSGSGSGTEFTLTISSLQSEDFAVYYCQQYHNWPPALTFGGGTKVEIK		3.29		410.405	>1000
			C1013		12m		singlet		IGHV1-69	IGHJ5	﻿CAGGTGCAGCTGGTGCAGTCTGGGGTTGAAGTGAAGAAGCCTGGGTCCTCGGTGAAGGTCTCCTGCAAGGCTTCTGGAGGCACCTTCACTGACTATGCTTTCAGCTGGGTGCGACAGGCCCCTGGACAAGGGCTTGAGTGGATGGGAGGGATCGTCCCTATATTTGCAACACCAGACTACGCAGAGAAGTTCCGGGGCAGAGTCACGATTACCGCGGACGAATCCACGAGCACAGCCTACATGGAGCTGAGCACCCTGAAATCCGAGGACACGGCCGTGTATTACTGTGCGAGAGCCTCCCTTACACTTCCTATAAGAGCAGCTCCTAGGTTCTGGTTCGACGCCTGGGGCCAGGGAACCCTGGTCACCGTCTCCTCAG	﻿QVQLVQSGVEVKKPGSSVKVSCKASGGTFTDYAFSWVRQAPGQGLEWMGGIVPIFATPDYAEKFRGRVTITADESTSTAYMELSTLKSEDTAVYYCARASLTLPIRAAPRFWFDAWGQGTLVTVSS		IGKV3-15	IGKJ4	﻿GAAATAGTGATGACGCAGTCTCCAGCCACCCTGTCTGTGTCTCCAGGGGAAAGAGCCACCCTCTCCTGCAGGGCCAGTCAGGGTGTTAGTACCCACTTAGCCTGGTACCAACAAAAACCTGGCCAGGCTCCCAGGCTCCTCATCTATGGTGCATCCACCAGGGCCACTGGTATCCCAGCCAGGTTCAGTGGCAGTGGGTCTGGGACAGAGTTCACTCTCACCATCAGCAGCCTGCAGTCTGAAGATTTTGCAGTTTATTACTGTCAGCAGTATCATAAGTGGCCTCCCGCGCTCACTTTCGGCGGAGGGACCAAGGTGGAGATCAAAC	﻿EIVMTQSPATLSVSPGERATLSCRASQGVSTHLAWYQQKPGQAPRLLIYGASTRATGIPARFSGSGSGTEFTLTISSLQSEDFAVYYCQQYHKWPPALTFGGGTKVEIK		8.92		65.3525	193.34
			C1014		12m		singlet		IGHV4-31	IGHJ6	﻿CAGGTGCAGCTGCAGGAGTCGGGCCCAGGACTGGTGAGGCCTTCACAGACCCTGTCCCTCACCTGCACTGTTTCTGGTGGCTCCATCGGCAGTGGCGCTTACTGGAGCTGGATCCGCCAGCACCCAGCGAAGGGCCTGGAGTGGATTGGGTACGTCTATTATAGTGGGAGCACCTTCTACAACCCGTCCCTCGAGACTCGAGTTTCCATATCAGTAGACATCTCTAAGGACCAGTTCTCCCTGGAACTGACTTCTGTGACTGTCGCGGACACGGCCGTGTATTACTGTGCGAGAGAGAAGATTGAGGTTGTCTCGATTGAGATGCGACCCCACTACTACGGCATAGACGTCTGGGGCCAAGGGACCACGGTCACCGTCTCCTCA	﻿QVQLQESGPGLVRPSQTLSLTCTVSGGSIGSGAYWSWIRQHPAKGLEWIGYVYYSGSTFYNPSLETRVSISVDISKDQFSLELTSVTVADTAVYYCAREKIEVVSIEMRPHYYGIDVWGQGTTVTVSS		IGKV3-15	IGKJ1	﻿GAAATAGTGATGACGCAGTCTCCAGCCACCCTGTCTGTGTCTCCAGGGGAAAGAGCCACCCTCTCCTGCAGGGCCAGTCAGAGTATTAGCAGCAACTTAGCCTGGTACCAGCAGAAACCTGGCCAGCCTCCCAGGCTCCTCATCTATGGTGCATCCACCAGGGCCACTGGTATCCCAGCCAGGTTCAGTGGCAGTGGGTCTGGGACAGAGTTCACTCTCACCATCAGCAGCCTGCAGTCTGAAGATATTGCAGTGTATTACTGTCAGCACTATAATAACTGGCCCCCGTGGACGTTCGGCCAAGGGACCAAGGTGGATATCAAAC	﻿EIVMTQSPATLSVSPGERATLSCRASQSISSNLAWYQQKPGQPPRLLIYGASTRATGIPARFSGSGSGTEFTLTISSLQSEDIAVYYCQHYNNWPPWTFGQGTKVDIK		2.95		>1000	>1000
			C1015		12m		singlet		IGHV4-4	IGHJ5	﻿CAGGTGCAGCTGCAGGAGTCGGGCCCAAGACTGGTGAAGCCTTCGGGGAGCCTGTCCCTCACGTGCGCTGTCTCTGGTGGCTCCCTCAGTAGTAGTAACTGGTGGAATTGGGTCCGCCAGTCCCCCGAGAAGGGGCTGGAATGGATTGGAGAAATCTTTCATAGTGGGAGCACCTACTACAACCCGTCCCTCAAGAGTCGAGTCACCATATCAGTAGACAAGTCCAAGAATCACTTCTCCCTGAATCTGAGGTCTGTGACCGCCGCGGACACGGCCGTCTATTACTGTGCGGGTTCATACAGTAACTACATCGGGGGGGTCTGGTTCGACCCCTGGGGCCAGGGGACCCTGGTCACCGTCTCCTCAG	﻿QVQLQESGPRLVKPSGSLSLTCAVSGGSLSSSNWWNWVRQSPEKGLEWIGEIFHSGSTYYNPSLKSRVTISVDKSKNHFSLNLRSVTAADTAVYYCAGSYSNYIGGVWFDPWGQGTLVTVSS		IGKV1-9	IGKJ4	﻿GACATCCAGTTGACCCAGTCTCCATCCTTCCTGTCTGCATCTGTAGGAGACAGAGTCACCATCACTTGCCGGGCCAGTCAGGGCATTAGCAGTTATTTAGCCTGGTATCAGCAAAAACCAGGGAAAGCCCCTAAGCTCCTGATCTATGCTGCATCCACTTTGCAAAGTGGGGTCCCATCAAGGTTCAGCGGCAGTGGATCTGGGACAGAATTCACTCTCACAATCAGCAGCCTGCAGCCTGAAGATTTTGCAACTTATTACTGTCAACAGCTTAATAGTTACCCTCTCACTTTCGGCGGAGGGACCAAGGTGGAAATCAAAC	﻿DIQLTQSPSFLSASVGDRVTITCRASQGISSYLAWYQQKPGKAPKLLIYAASTLQSGVPSRFSGSGSGTEFTLTISSLQPEDFATYYCQQLNSYPLTFGGGTKVEIK		>1000		>1000	>1000
			C1016		12m		singlet		IGHV4-4	IGHJ4	﻿CAGGTGCAGCTGCAGGAGTCGGGCCCAGGACTGGTGAAGCCTTCGGGGACCCTGTCCCTCACCTGCGCTGTGTCTGGAGGCCCCATCAGTAGTAATCACTGGTGGAGTTGGGTCCGCCAGCCCCCAGGGAAGGGGCTGGAGTGGATTGGGGAAGTCTATCGTAATGGGAACACCAACTACCACCCGTCCCTCAAGAGTCGAGTCACCATGTCCATAGACAACTCCAAGAACCAGTTTTCCCTGAGCCTGACCTCTGTGACCGCCGCGGACACGGCCGTATATTATTGTGCAAGAGGGGGGGATCTCGCAATGGGCCCCGAATATCTTGACTTCTGGGGCCAGGGAACCCTGGTCACCGTCTCCTCAG	﻿QVQLQESGPGLVKPSGTLSLTCAVSGGPISSNHWWSWVRQPPGKGLEWIGEVYRNGNTNYHPSLKSRVTMSIDNSKNQFSLSLTSVTAADTAVYYCARGGDLAMGPEYLDFWGQGTLVTVSS		IGLV2-14	IGLJ2	﻿CAGTCTGCCCTGACTCAGCCTGCCTCCGTGTCTGGGTCTCCTGGACAGTCGATCACCATCTCTTGTACTGGAACCAGCAGTGACGTTGGTGCTAATAATTATGTCTCCTGGTACCAACAACACCCAGGCAAAGCCCCCAAACTCATGATTTATGATGTCATTAATCGGCCCTCAGGGGTCTCTGATCGCTTCTCTGGCTCCAAGTCTGGCAACACGGCCTCCCTCACCATCTCTGGGCTCCAGGCTGAGGACGAGGCTGATTATTACTGCAGTTCATTTTCAACTAGCAGCACTCTTCTTTTCGGCGGGGGGACCAAACTGACCGTCCTAG	﻿QSALTQPASVSGSPGQSITISCTGTSSDVGANNYVSWYQQHPGKAPKLMIYDVINRPSGVSDRFSGSKSGNTASLTISGLQAEDEADYYCSSFSTSSTLLFGGGTKLTVL		2.16		30.3904	111.92
			C1018		12m		singlet		IGHV3-33	IGHJ6	﻿CAGGTGCAGCTGGTGGAGTCTGGGGGAGGCGTGGTCCAGCCTGGGAGGTCCCTGAGACTCCTCTGTGCAGCGTCTGGCTTCACCTTCAACACCCATGGCATGCACTGGGTCCGCCAGGCTCCAGGCAAGGGGCTGGAGTGGGTGGCAGTGATTTGGTTTGATGGAAGTAACAAATACTATGCAGACTCCGTGAAGGGCCGATTCACCATCTCGAGAGACAATTCCACGAACACCCTCTATCTGCAAATGAACAGCCTGAGAGCCGAGGACACGGCTGTGTATTATTGTGCGAGAGTTTATGGTGGTCTCCCCTACTATTACGCTATAGATGTCTGGGGCCAAGGGACCACGGTCACCGTCTCCTCA	﻿QVQLVESGGGVVQPGRSLRLLCAASGFTFNTHGMHWVRQAPGKGLEWVAVIWFDGSNKYYADSVKGRFTISRDNSTNTLYLQMNSLRAEDTAVYYCARVYGGLPYYYAIDVWGQGTTVTVSS		IGLV1-40	IGLJ3	﻿CAGTCTGTGCTGACGCAGCCGCCCTCAGTGTCTGGGGCCCCAGGGCAGAGGGTCACCATCTCCTGCGCCGGGAGCAGCTCCAACATCGGGGCAGGTTATGGTGTACACTGGAGCCAACAACTTCCGGGAAGACCCCCCAAACTCCTCATCTATGGTGACAGCAATCGCCCCTCTGGGGTCCCTGACCGATTCTCTGGCTCCAACTCTGGCACATCAGCCTCCCTGGCCATCACTGGGCTTCAGGCTGAGGATGAGGCTGTTTATTACTGCCAGTCGTATGACAGAAGCCTGAGAGCTTGGGTGTTCGGCGGAGGGACTAAACTGTCCGTCCTAG	﻿QSVLTQPPSVSGAPGQRVTISCAGSSSNIGAGYGVHWSQQLPGRPPKLLIYGDSNRPSGVPDRFSGSNSGTSASLAITGLQAEDEAVYYCQSYDRSLRAWVFGGGTKLSVL		3.09		>1000	>1000
			C1019		12m		singlet		IGHV3-30	IGHJ4	﻿CAGGTGCAGCTGGTGGAGTCTGGGGGAGGCGTGGTCCAGCCTGGGACGCCCCTGAGACTCTCCTGTGCAGCCTCTGGATTCACCTTCAGTAGCTATGCTATGCACTGGGTCCGCCAGGCTCCAGGCAAGGGGCTGGAGTGGGTGGCAATGATATCATATGATGGAGGCAATAAATACTACGCGGACTCCGTGAAGGGCCGATTCACCATCTCCAGAGACAATTCCAAGAACACGCTGTTTCTGCAAATGAACAGCCTGAGAGGTGAGGACACGGCTGTGTATTACTGTGCGAGGTCATTTTCCATCCGCATTGGACATAAGGACAACTGGGGCCAGGGAACCCTGGTCACCGTCTCCTCAG	﻿QVQLVESGGGVVQPGTPLRLSCAASGFTFSSYAMHWVRQAPGKGLEWVAMISYDGGNKYYADSVKGRFTISRDNSKNTLFLQMNSLRGEDTAVYYCARSFSIRIGHKDNWGQGTLVTVSS		IGLV6-57	IGLJ3	﻿AATTTTATGCTGACTCAGCCCCACTCTGTGTCGGAGTCTCCGGGGAAGACGGTAACCATCTCCTGCACCGGCAGCAGTGGCAGCATTGCCAACAACTATGTGCAGTGGTACCAGCAGCGCCCGGGCAGTGCCCCCACTCCTGTGATCTATGAGGATGACCAAAGACCCTCTGGGGTCCCTGATCGCTTCTCTGGCTCCATCGACAGCTCCTCCAACTCTGCCTCCCTCAGCATCTCTGGACTGAAGACTGAGGACGAGGCTGATTACTACTGTCAGTCTTATGATAGCACCAATTTTTGGGTGTTCGGCGGAGGGACCAAGCTGACCGTCCTAG	﻿NFMLTQPHSVSESPGKTVTISCTGSSGSIANNYVQWYQQRPGSAPTPVIYEDDQRPSGVPDRFSGSIDSSSNSASLSISGLKTEDEADYYCQSYDSTNFWVFGGGTKLTVL		2.8		30.2531	>1000
			C1020		12m		singlet		IGHV1-46	IGHJ4	﻿CAGGTGCAGCTGGTGCAGTCTGGGGCTGAGGTGAAGAAGCCTGGGGCCTCTGTGAAGATTTCCTGCAAGGCATCTGGATACAGCTTCAGCAACTACTATATACACTGGGTGCGACAGGCCCCTGGACAAGGGCTTGAGTGGATGGGAATAATCAACCCTAGTGGTAATAGCATAAGCTACGCACAGAAGTTCCAGGGCAGAGTCACCATGACCGGGGACACGTCCACGAGCACAGTCTACATGGAGCTGAGCAGCCTAAGATCTGAGGACACGGCCGTATATTACTGTGCGAGATCGGTTTTCCCGGTACCAGCTGCGGGGGGTTGTGACTACTGGGGCCAGGGAACCCTGGTCACCGTCTCCTCAG	﻿QVQLVQSGAEVKKPGASVKISCKASGYSFSNYYIHWVRQAPGQGLEWMGIINPSGNSISYAQKFQGRVTMTGDTSTSTVYMELSSLRSEDTAVYYCARSVFPVPAAGGCDYWGQGTLVTVSS		IGKV1-39	IGKJ2	﻿GACATCCAGATGACCCAGTCTCCATCCTCCCTGTCTGCATCTGTAGGAGACAGAGTCACCATCACTTGCCGGGCAAGTCAGAGCATTACCACCTCCTTAAATTGGTATCAGCAGAAACCAGGGAAAGCCCCTAAGCTCCTGATCTATTCTGCATCCACTTTGGAAAGTGGGGTCCCATCAAGGTTCAGTGGCAGTGGATCTGGGACAGATTTCACTCTCACCATCAGCAGTCTGCAACCTGAAGATTTTGCAACTTATTATTGTCAGCAGACTTACAGAGCCCCTCCGTACACTTTTGGCCAGGGGACCAAGCTGGAGATCAAAC	﻿DIQMTQSPSSLSASVGDRVTITCRASQSITTSLNWYQQKPGKAPKLLIYSASTLESGVPSRFSGSGSGTDFTLTISSLQPEDFATYYCQQTYRAPPYTFGQGTKLEIK		2.06		>1000	>1000
			C1021		12m		singlet		IGHV1-46	IGHJ4	﻿CAGGTGCAGCTGGTGCAGTCTGGGGCTGAGCTAAAGAAGCCTGGGGCCTCAGTGAAGGTTTCCTGCAAGGCTTCTGGATATACCTTCTCCACCTACTATATACACTGGGTGCGACAGGCCCCTGGACAAGGGCTAGAGTGGATGGGAATAATCAACCCTGAAGCTGGTAGCACAAGCTATGCACAGAAGTTCCAGGGCAGAGTCACCATGACCACGGACACGTCCACGAGCACAGTCTACATGGAGTTGATCAGCCTGAGATCTCAGGACACGGCCATATATTACTGTGCGAGAGATGCTGTTGGAGTCCCAGCTATAAACTCGCTTGAGTACTGGGGCCAGGGAACCCTGGTCACCGTCTCCTCAG	﻿QVQLVQSGAELKKPGASVKVSCKASGYTFSTYYIHWVRQAPGQGLEWMGIINPEAGSTSYAQKFQGRVTMTTDTSTSTVYMELISLRSQDTAIYYCARDAVGVPAINSLEYWGQGTLVTVSS		IGKV3-11	IGKJ4	﻿GAAATTGTGTTGACACAGTCTCCAGCCACCCTGTCTTTGTCTCCAGGGGAAAGAGCCACCCTCTCCTGCAGGGCCAGTCAGAGTATTAGTAGCTACTTAGCCTGGTACCAACAGAAACCTGGCCAGGCTCCCAGGCTCCTCATTTATGATGCATCCAACAGGGCCACTGACATCTCAGCCAGGTTCAGTGGCAGTGGGTCTGGGACAGACTTCACTCTCACCATCAGCAGCCTAGAGCCTGAAGATTTTGCAGTTTATTACTGTCAGCACCGTAGCAACTGGCCTCCCTCGTTCACTTTCGGCGGAGGGACCAAGGTGGAAATCAAAC	﻿EIVLTQSPATLSLSPGERATLSCRASQSISSYLAWYQQKPGQAPRLLIYDASNRATDISARFSGSGSGTDFTLTISSLEPEDFAVYYCQHRSNWPPSFTFGGGTKVEIK		2.53		>1000	>1000
			C1022		12m		singlet		IGHV1-46	IGHJ5	﻿CAGGTGCAGCTGGTGCAGTCTGGGGCTGAGGTGAAGACGCCTGGGGCCTCAGTGAAGGTCTCCTGCCAGGCATCTGGAGACACCTTCACCAGCCAGTATCTGCACTGGGTGCGACAGGCCCCTGGACAAGGGCTTGAGTGGATGGGAATAATCAACCCCACTGCTGGAAGCACAACGTACGCACAGAAGTTTCAGGGCAGAGTCACCATGACCAGGGACACGTCCACGAGCACAGTCTACATGGAATTGAGGAGTCTGAGATCTGAGGACATGGCCGTGTATTACTGTGCGAGAGGCGGATTTATCCCTATGGTTCGGGGATTTATCGACCACTGGGGTCAGGGAACCCTGGTCACCGTCTCCTCAG	﻿QVQLVQSGAEVKTPGASVKVSCQASGDTFTSQYLHWVRQAPGQGLEWMGIINPTAGSTTYAQKFQGRVTMTRDTSTSTVYMELRSLRSEDMAVYYCARGGFIPMVRGFIDHWGQGTLVTVSS		IGLV2-14	IGLJ1	﻿CAGTCTGCCCTGACTCAGCCTGCCTCCGTGTCTGGGTCTCCTGGACAGTCGATCACCATCTCCTGCACTGGAACCAGCAGTGACGTTGGTGGTTATAACTATGTCTCCTGGTACCAACAACACCCAGGCAAGGCCCCCAAACTCATGATTTATGATGTCAGTAATCGGCCCTCAGGGGTTTCTACTCGCTTCTCTGGCTCCAAGTCTGGCAACACGGCCTCCCTGACCATCTCTGGGCTCCAGGCTGAGGACGAGGCTGATTATTACTGCAGCTCACCTACAAGCAGCAACACTCACGTCTTCGGAACTGGGACCAAGGTCACCGTCCTAG	﻿QSALTQPASVSGSPGQSITISCTGTSSDVGGYNYVSWYQQHPGKAPKLMIYDVSNRPSGVSTRFSGSKSGNTASLTISGLQAEDEADYYCSSPTSSNTHVFGTGTKVTVL		1.66		>1000	>1000
			C1023		12m		singlet		IGHV1-46	IGHJ5	﻿CAGGTGCAGCTGGTGCAGTCTGGGGCTGAAATGAAGAAGCCTGGGGCCTCAGTGAAAATTTCCTGCAAGGCATCTGGGGACACCTTCACCACCAACTATTTCCACTGGGTGCGACAGGCCCCTGGACAAGGGCTTGAGTGGATGGGAATAATCAACCCTAGTGCTGGTAGCACAACCTACGCACAGAGATTTCAGGGCAGAGTCACCATGACCGGGGACTCGTCCACGAACACAGTCTACTTGGAGCTTCGCAGTCTGAGATCTGAGGACACGGCCATGTATTTCTGTGCGAAAGGGTCTTATATTCCTGCTATGAGGTCGTCGTTCGACCCCTGGGGCCAGGGAACCCTGGTCACCGTCTCCTCAG	﻿QVQLVQSGAEMKKPGASVKISCKASGDTFTTNYFHWVRQAPGQGLEWMGIINPSAGSTTYAQRFQGRVTMTGDSSTNTVYLELRSLRSEDTAMYFCAKGSYIPAMRSSFDPWGQGTLVTVSS		IGKV3-20	IGKJ2	﻿GAAATTGTGTTGACGCAGTCTCCAGGCACCCTGTCTTTGTCTCCAGGGGAAAGAGCCACCCTCTCCTGCAGGGCCAGTCAGAGTGTTAGTCACAGGTACTTGGCCTGGTACCAGCAGAAACCTGGCCAGGCTCCCAGGCTCCTCATCGATGGTGCATCCAACAGGGCTACTGGCATCCCAGACAGGTTCAGTGGCAGTGGGTCTGGGACAGACTTCACTCTCACCATCAGCAGACTGGAGCCTGAAGATTTTGGAGTGTATTACTGTCAGCAATATGGTAGCTCCCCTCCGTTCACTTTTGGCCAGGGGACCAAGCTGGAGATCAAAC	﻿EIVLTQSPGTLSLSPGERATLSCRASQSVSHRYLAWYQQKPGQAPRLLIDGASNRATGIPDRFSGSGSGTDFTLTISRLEPEDFGVYYCQQYGSSPPFTFGQGTKLEIK		1.13		>1000	>1000
			C1024		12m		singlet		IGHV3-30	IGHJ4	﻿CAGGTGCAGCTGGTGGAGTCTGGGGGAGGCGTGGTCCAGCCTGGGAGGTCCCTGAGACTCTCCTGTGCAGCCTCTGGATTCACCTTCAGTGACTACGCTATGCACTGGGTCCGCCAGGCTCCAGGGAAGGGGCTGGAGTGGGTGGCAATGATATCCTATGATGGAAACAGTCAATACTACGCAGACTCCGTGAAGGGCCGATTCACCATTTCCAGAGACAATTCCAAGAACACACTGTATTTGCAAATGAACATCCTGAGACCTGAGGACACGGCTGTCTATTACTGTGCGAGAACATTTTCCATCCGGATTGGACATCATGACTACTGGGGCCAGGGAACCCTGGTCACCGTCTCCTCAG	﻿QVQLVESGGGVVQPGRSLRLSCAASGFTFSDYAMHWVRQAPGKGLEWVAMISYDGNSQYYADSVKGRFTISRDNSKNTLYLQMNILRPEDTAVYYCARTFSIRIGHHDYWGQGTLVTVSS		IGLV6-57	IGLJ3	﻿AATTTTATGCTGACTCAGCCCCACTCTGTGTCGGAGTCTCCGGGGAAGACGGTAACCATCTCCTGCACCGGCTCCAGTGGCAGCATTGCCAGCAACTATGTGCATTGGTACCAGCAGCGCCCGGGCAGTGCCCCCACCACTGTGATCTTTGAAGATAACCAAAGACCCTCTGGGGTCCCTGATCGGTTCTCTGGCTCCATCGACAGCTCCTCCAACTCTGCCTCCCTCACCATCTCTGGACTGAAGACTGAGGACGAGGCTGACTACTACTGTCAGTCTTATGATAGCAGCAGTTTTTGGGTGTTCGGCGGAGGGACCAAGCTGACCGTCCTAG	﻿NFMLTQPHSVSESPGKTVTISCTGSSGSIASNYVHWYQQRPGSAPTTVIFEDNQRPSGVPDRFSGSIDSSSNSASLTISGLKTEDEADYYCQSYDSSSFWVFGGGTKLTVL		2.37		64.4913	433.221
	COV107		C903		12m		singlet		IGHV3-53	IGHJ4	﻿GAGGTGCAGCTGGTGGAGTCTGGAGGAGGCTTGATCCAGCCTGGGGGGTCCCTGAGACTCTCCTGTGCAGCCTCTGGGTTCATCGTCAGTAGGAACTACATGAGCTGGGTCCGCCAGGCTCCCGGGAAGGGGCTGGAGTGGGTCTCAATTATTTATAGTGGTGGTAGTACATTCTACGCAGACTCCGTGAAGGGCCGATTCACCATCTCCAGAGACAATTCCAAGAACACGGTGTATCTTCAAATGAACAGCCTGAGAGCCGAGGACACGGCCGTGTATTACTGTGCGAGAGATTACGGTGACTTCTACTTTGACTACTGGGGCCAGGGAACCCTGGTCACCGTCTCCTCAG	﻿EVQLVESGGGLIQPGGSLRLSCAASGFIVSRNYMSWVRQAPGKGLEWVSIIYSGGSTFYADSVKGRFTISRDNSKNTVYLQMNSLRAEDTAVYYCARDYGDFYFDYWGQGTLVTVSS		IGKV3-20	IGKJ1	﻿GAAATTGTGTTGACGCAGTCTCCAGGCACCCTGTCTTTGTCTCCAGGGGAAAGAGCCACCCTCTCCTGCAGGGCCAGTCAGAGTGTTAGCAGCAGCTACTTAGCCTGGTACCAGCAAAAACCTGGCCAGGCTCCCAGGCTCCTCATCTTTGATGTATCCAGCAGGGCCACTGGCATCCCAGACAGGTTCAGTGGCAGTGGGTCTGGGACAGACTTCACTCTCACCATCAGCAGACTGGAGCCTGAAGATTTTGCAGTGTATTACTGTCAGCAGTATGGTAGCTCACCTCGTACGTTCGGCCAAGGGACCAAGGTGGAAATCAAAC	﻿EIVLTQSPGTLSLSPGERATLSCRASQSVSSSYLAWYQQKPGQAPRLLIFDVSSRATGIPDRFSGSGSGTDFTLTISRLEPEDFAVYYCQQYGSSPRTFGQGTKVEIK		2.54		7.217	43.9433
			C904		12m		singlet		IGHV4-34	IGHJ3	﻿CAGGTGCAGCTACAGCAGTGGGGCGCAGGACTGTTGAAGCCTTCGGAGACCCTGTCCCTCACCTGCGCTGTCAATGGTGGGTCCTTAAGTCTTTACTATTGGAGTTGGATCCGCCAGTCCCCAGGGAAGGGGCTGGAGTGGATTGGAGAAATCAATCATTTTGGAGGCTCCGACTACAAGCCGTCCCTCAAGAGTCGAGTCAGCATATCAGTTGACACGTCCACGAACCAGTTCTCCCTGAAATTGAGCTCTGTGACCGCCGCGGACACGGCTGTTTATTACTGTGCGAGAAAGCCCCTCCTCCACAGTAACATTTCACCTGGCGCTTTTGATATCTGGGGTCAAGGGACAATGGTCACCGTCTCTTCAG	﻿QVQLQQWGAGLLKPSETLSLTCAVNGGSLSLYYWSWIRQSPGKGLEWIGEINHFGGSDYKPSLKSRVSISVDTSTNQFSLKLSSVTAADTAVYYCARKPLLHSNISPGAFDIWGQGTMVTVSS		IGKV3-20	IGKJ4	﻿GAAATTGTGTTGACGCAGTCTCCAGGCACCTTGTCTTTGTCTCCAGGGGAAAGAGCCACCCTCTCCTGCAGGGCCAGTCAGAGTGTTGCCGGCAGCTACTTAGCCTGGTATCAGCAGAAACCTGGCCAGGCTCCCAGGCTCCTCATCTATGGTGCATCCAGCCGGGCCACTGGCGTCCCAGACAGGATCAGTGGCAGTGGGTCTGGGACAGACTTCACTCTCACCATCAGCAGACTGGAGCCTGAGGATTTTGCAGTGTATTACTGTCAGCAGTATACTAACACACCTCGGACTTTCGGCGGAGGGACCAAGGTGGAAATCA	﻿EIVLTQSPGTLSLSPGERATLSCRASQSVAGSYLAWYQQKPGQAPRLLIYGASSRATGVPDRISGSGSGTDFTLTISRLEPEDFAVYYCQQYTNTPRTFGGGTKVEI		3.31		5.60135	52.1986
			C905		12m		clone		IGHV4-31	IGHJ5	﻿CAGGTGCAGCTGCAGGAGTCGGGCCCAGGGCTGGTGACGCCTTCACAGACCCTGTCCCTCACCTGCAGTGTCTCTGGTGGCTCCATCCACAGTAGGGATTTCTACTGGGGCTGGATCCGCCAGCACCCAGGGAAGGGCCTGGAGTGGATTGGGCACATCTATTACACTGGGAACACCTACTACAATCCGTCCCTCAAGAGTCGAGTCACCATATCAGCAGACACGTCTAAGAACCAGTTCTCCCTGAAACTGAGTTCTGTGACTGCCGCGGACACGGCCGTGTATTACTGTGCAAGAGCGACAGTAGTGATTACCCTCCACTGGTTCGACCCCTGGGGCCAGGGAACCCTGGTCACCGTCTCCTCAG	﻿QVQLQESGPGLVTPSQTLSLTCSVSGGSIHSRDFYWGWIRQHPGKGLEWIGHIYYTGNTYYNPSLKSRVTISADTSKNQFSLKLSSVTAADTAVYYCARATVVITLHWFDPWGQGTLVTVSS		IGLV6-57	IGLJ2	﻿AATTTTATGCTGACTCAGCCCCACTCTGTGTCGGAGTCTCCGGGGAAGACGGTGACCATCTCCTGCACCGGCAGCGGTGGCAGCATTGCCAGCAACTATGTGCAGTGGTACCAGCAGCGCCCGGGCAGTGCCCCCACCACTGTGATCTATGAAGATAATGAAAGACCCTCTGGGGTCCCTGATCGGTTCTCTGGCTCCATCGACAGCTCCTCCAACTCTGCCTCCCTCACCATCTCTGGAGTGAAGACTGAGGACGAGGCTGACTACTTCTGTCAGTCTTATGATGTCGGCAATCCTGTGATATTCGGCGGAGGGACCAAGCTGACCGTCCTA	﻿NFMLTQPHSVSESPGKTVTISCTGSGGSIASNYVQWYQQRPGSAPTTVIYEDNERPSGVPDRFSGSIDSSSNSASLTISGVKTEDEADYFCQSYDVGNPVIFGGGTKLTVL		3.06		76.0384	>1000
			C906		12m		singlet		IGHV3-49	IGHJ4	﻿GAGGTGCAGCTGGTGGAGTCTGGGGGAGGCTTGATAAAGCCAGGGCGGTCCCTGAGACTCTCTTGTACAGCCTCTGGATTCACCTTTGGTGATTATGCTATGACCTGGTTCCGCCAGGCTCCAGGGAAGGGGCTGGAGTGGGTAGGTTTCATTAGAAGCAAAGCTTATGGTGGGACAACAGGATACGCCGCGTCTGTGAAATACAGATTTACCATCTCAAGAGATGATTCCAAAAGCATCGTCTATCTGCAAATGGACAGCCTGAAAACCGAGGACACAGCCGTCTATTACTGTACTAGGTGGGACGGGTGGAGTCAACATGACTATTGGGGCCAGGGAACCCTGGTCACCGTCTCCTCAG	﻿EVQLVESGGGLIKPGRSLRLSCTASGFTFGDYAMTWFRQAPGKGLEWVGFIRSKAYGGTTGYAASVKYRFTISRDDSKSIVYLQMDSLKTEDTAVYYCTRWDGWSQHDYWGQGTLVTVSS		IGKV2-28	IGKJ2	﻿GATATTGTGATGACTCAGTCTCCACTCTCCCTGTCCGTCACCCCTGGAGAGCCGGCCTCCATCTCCTGCAGGTCTAGTCAGAGCCTCCTGCATAGTAATGGAATCAACTATTTCGATTGGTACCTGCAGAAGCCAGGGCAGTCTCCACAGCTCCTGATCTATTTGGGTTCTAATCGGGCCTCCGGGGTCCCTGACAGGTTCAGTGGCAGTGGATCAGGCACAGATTTTACACTGAAGATCAGCAGAGTGGAGGCTGAGGATGTTGGGGTTTATTACTGCATGCAAGTTCTACAAATTCCGTACACTTTTGGCCAGGGGACCAAGCTGGAGATCAA	﻿DIVMTQSPLSLSVTPGEPASISCRSSQSLLHSNGINYFDWYLQKPGQSPQLLIYLGSNRASGVPDRFSGSGSGTDFTLKISRVEAEDVGVYYCMQVLQIPYTFGQGTKLEI		1.07		4.91311	62.343
			C907		12m		singlet		IGHV4-59	IGHJ6	﻿CAGGTGCAGCTGCAGGAGTCGGGCCCAGGACTGGTGAAGCCTTCGGAGACCCTGTCCCTCACCTGCACTGTCTCTGGTGGCTCCATCACTAGTTACTACTGGACCTGGATCCGGCAGTCCCCAGGGAAGGGACTGGAGTGGATTGGGTATATCTATTACATTGGGAGCACCAACTACAACCCCTCCCTCAAGAGTCGACTCACCATATCACTAGCCACGTCGAAGAACCAGTTCTCCCTGAGGCTGAACTCTGTGACCGCTGCGGACACGGCCGTGTATTACTGTGCGAGTTATTACAATGATACTAGTGGTTATTCATACGGTCTGGACGTCTGGGGCCAAGGGACCACGGTCACCGTCTCCTCA	﻿QVQLQESGPGLVKPSETLSLTCTVSGGSITSYYWTWIRQSPGKGLEWIGYIYYIGSTNYNPSLKSRLTISLATSKNQFSLRLNSVTAADTAVYYCASYYNDTSGYSYGLDVWGQGTTVTVSS		IGKV1-39	IGKJ1	﻿GACATCCAGATGACCCAGTCTCCATCCTCCCTGTCTGCATTTGTAGGAGACAGAGTCACCATCACTTGCCGGGCAGGTCAGAGTATTAGCAGCTATTTACATTGGTATCAGCAGAAACCAGGGAAAGCCCCTAAGCTCCTGATCTATGCTACATCCACTTTGCAAAGTGGAGTCCCATCAAGGTTCAGTGGCAGAGGATCTGGGACAGATTTCACTCTCACCATCAGCGGTCTCCAACCTGAAGATTTTGCAACTTACTACTGTCAACAGAGTTACAGTACCCCTCAGACGTTCGGCCAAGGGACCAAGGTGGAAATCAAAC	﻿DIQMTQSPSSLSAFVGDRVTITCRAGQSISSYLHWYQQKPGKAPKLLIYATSTLQSGVPSRFSGRGSGTDFTLTISGLQPEDFATYYCQQSYSTPQTFGQGTKVEIK		3.71		793.15	>1000
			C908		12m		singlet		IGHV5-51	IGHJ4	﻿GAGGTGCAGCTGGTGCAGTCTGGAGCAGAGGTGAAAAAGCCCGGGGAGTCTCTGAAGATCTCCTGTAAGGCTTCCGGATACAGCTTTACCATCTACTGGATCGGCTGGGTGCGCCAGATGCCCGGGAAAGGCCTGGAGTGGATGGGGATCATCTATCCTGGTGAGTCTGAAACCAGATACAGCCCGTCCTTCCAAGGCCAGGTCACCATCTCAGCCGACAAGTCCATCAGCACCGCCTACCTGCAGTGGAGGAGCCTGAAGGCCTCGGACACCGCCATGTATTACTGTGCGAGGGGAGGGCCCCCCGGGGGGGTCAAACTGGAACTGACTGACTACTGGGGCCAGGGAACCCTGGTCACCGTCTCCTCAG	﻿EVQLVQSGAEVKKPGESLKISCKASGYSFTIYWIGWVRQMPGKGLEWMGIIYPGESETRYSPSFQGQVTISADKSISTAYLQWRSLKASDTAMYYCARGGPPGGVKLELTDYWGQGTLVTVSS		IGLV1-44	IGLJ2	﻿CAGTCTGTGCTGACTCAGCCACCCTCAGCGTCTGGGACCCCCGGGCAGAGGGTCACCATCTCGTGTTCTGGGAGCAGCTCCAACATCGGAGATAATACCGTAAACTGGTACCAGCAGCTCCCAGGAACGGCCCCCAAACTCCTCATCTATAATAATATTCAGCGGCCCTCAGGGGTCCCTGACCGATTCTCTGGCTCCAAGTCTGGCACCTCAGCCTCCCTGGCCATCAGTGGGCTCCAGTCTGAGGATGAGGCTGATTATTACTGTGCATCATGGGATGACAGCCTGAATGGTCCTGTGGTATTCGGCGGAGGGACCAAGCTGACCGTCCTAG	﻿QSVLTQPPSASGTPGQRVTISCSGSSSNIGDNTVNWYQQLPGTAPKLLIYNNIQRPSGVPDRFSGSKSGTSASLAISGLQSEDEADYYCASWDDSLNGPVVFGGGTKLTVL		1.27		89.769	>1000
			C909		6.2m		singlet		IGHV1-8	IGHJ4	﻿CAGGTGCAGCTGGTGCAGTCTGGGGCTGAGGTGAAGAAGCCTGGGGCCTCAGTGAAGGTCTCCTGCAGGGCTTCTGGATACACCTTCCCCAACTATGATCTTAACTGGGTGCGACAGGCCACTGGACAAGGGCTTGAGTGGATGGGATGGATGAACCCTAACAGTGGTAACACAGGCTATGCACAGAAGTTCCAGGGCAGAATCACCATGACCAGGATCACGTCCATAAGCACAGCCTACATGGAGCTGAGCAGCCTGAGATCTGAGGACACGGCCGTATATTACTGTGCGAGAGGCCGGGCTAATTGGAACTCGAACTTCCTCCTTGACTCCTGGGGCCAGGGAACCCTGGTCACCGTCTCCTCAG	﻿QVQLVQSGAEVKKPGASVKVSCRASGYTFPNYDLNWVRQATGQGLEWMGWMNPNSGNTGYAQKFQGRITMTRITSISTAYMELSSLRSEDTAVYYCARGRANWNSNFLLDSWGQGTLVTVSS		IGLV2-23	IGLJ1	﻿CAGTCTGCCCTGACTCAGCCTGCCTCCGTGTCTGGGTCTCCTGGACAGTCGATCACCATCTCCTGCACTGGAACCAGCAGTGATGTTGGGGGTTATAACCTTGTCTCTTGGTACCAACAGTACCCAGGCAACGTCCCCAAACTCATGATCTATGAGGACGCTAAGCGGCCCTCAGGGGTTTCTAATCGCTTCTCTGGCTCGAAGTCTGCCAACACGGCCTCCCTGACAATCTCTGGGCTCCAGGCTGAGGACGAGGCTGATTATTACTGCTGCTCATATGCAGGTAGTAGCACCCGTTATGTCTTCGGAACTGGGACCAAGGTCACCGTCCTAG	﻿QSALTQPASVSGSPGQSITISCTGTSSDVGGYNLVSWYQQYPGNVPKLMIYEDAKRPSGVSNRFSGSKSANTASLTISGLQAEDEADYYCCSYAGSSTRYVFGTGTKVTVL		3.24		4.11924	20.6375
			C910		12m		clone		IGHV1-8	IGHJ4	﻿CAGGTGCAGCTGGTGCAGTCTGGGGCTGCGGTGAAGAAGCCTGGGGCCTCAGTGAAGGTCTCCTGCAAGGCTTCTGGATACACCTTCACCAGTTATGATATCAACTGGGTGCGACAGGCCCCTGGACAAGGCCTTGAGTGGATGGGATGGATGAACCCTAACAGTGGTAACACAGGCTTTGCACAGAGGTTCCAGGGCAGAGCCACCCTGTCCAGGGACACCTCCATAACCACAGCCTACATGGAGCTGACCACCCTCAGATCTGAGGACACGGCCGTGTATTACTGTGCGAGAGGCCGGGCTAACTACAACTCTAAGTTCCTCCTTGACAACTGGGGCCAGGGAACCCTGGTCACCGTCTCCTCAG	﻿QVQLVQSGAAVKKPGASVKVSCKASGYTFTSYDINWVRQAPGQGLEWMGWMNPNSGNTGFAQRFQGRATLSRDTSITTAYMELTTLRSEDTAVYYCARGRANYNSKFLLDNWGQGTLVTVSS		IGLV2-23	IGLJ1	﻿CAGTCTGCCCTGACTCAGCCTGCCTCCGTGTCTGGGTCTCCTGGACAGTCGATCACCATCTCCTGCACTGGAACCAGCAGTGATGTTGGGAGTTATAACCTTGTCTCCTGGTACCAACAACACCCAGGCACAGCCCCCAAACTCATGATTTATGAGGGCAGTAAGCGGCCCTCAGGGGTTTCTGATCGCTTCTCTGGCTACAAGTCTGGCAACACGGCCTCCCTGACAATCTCTGGGCTCCAGGCTGATGACGAGGCTGATTATTACTGCTGCTCATTTGCAGGGAGTACCACCCGTTATGTCTTCGGCACTGGGACCAGGGTCACCGTCCTAG	﻿QSALTQPASVSGSPGQSITISCTGTSSDVGSYNLVSWYQQHPGTAPKLMIYEGSKRPSGVSDRFSGYKSGNTASLTISGLQADDEADYYCCSFAGSTTRYVFGTGTRVTVL		2.47		2.65813	18.9095
			C911		6.2m		singlet		IGHV3-30	IGHJ4	﻿CAGGTGCAGCTGGTGGAGTCTGGGGGAGGCGTGGTCCAGCCTGGGGGGTCCCTGAGACTCTCCTGTGCAGCCTCTGCATTCACCTTCAGTAGTTATGCTATGCACTGGATCCGCCAGTCTCCAGGCAAGGGGCTGGAGTGGGTGGCAGTTATATCATCTGATGGAAGCAGTAAATTCTACGCAGACTCCGTGAAGGGCCGATTCACCATCTCCAGAGACAACTCCAAGAACACACTGTATCTGCAAATGAACAGCCTGAGCGCTGAGGACACGGCTGTGTATTACTGTGCGAGAGATCTGGAGAATGTGCTGATAGAAGTGGCCCTTCAGGACTGGGGCCAGGGAACCCTGGTCACCGTCTCCTCAG	﻿QVQLVESGGGVVQPGGSLRLSCAASAFTFSSYAMHWIRQSPGKGLEWVAVISSDGSSKFYADSVKGRFTISRDNSKNTLYLQMNSLSAEDTAVYYCARDLENVLIEVALQDWGQGTLVTVSS		IGKV1-39	IGKJ4	﻿GACATCCAGATGACCCAGTCTCCATCCTCCCTGTCTGCATCTGTAGGAGACAGAGTCACCATCACTTGCCGGGCAAGTCAGAGCATTAACAGCTATTTAAATTGGTATCAGCAGAAACCAGGGAAAGCCCCTAAACTCCTGATCTATGCTGCATCCAGTTTGCACAGTGGGGTCCCATCAAGGTTCAGTGGCAGTGGATCTGGGACAGATTTCACTCTCACCATCAGCAGTCTGCAACCTGAAGATTTTGCAACTTACTACTGTCAACAGAGTTACACTACCCTCGCGCTCACTTTCGGCGGAGGGACCAAGGTGGAAATCAAAC	﻿DIQMTQSPSSLSASVGDRVTITCRASQSINSYLNWYQQKPGKAPKLLIYAASSLHSGVPSRFSGSGSGTDFTLTISSLQPEDFATYYCQQSYTTLALTFGGGTKVEIK		2.36		>1000	>1000
			C912		12m		singlet		IGHV3-30	IGHJ4	﻿CAGGTGCAGCTGGTGGAGTCTGGGGGAGGCGTGGTCCAGCCTGGGAGGTCCCTGAGACTCTCCTGTGCAGCCTCTGGATTCAGCTTCAGTACCTACACCATGCACTGGGTCCGCCAGACTCCAGACAAGGGGCTGGAGTGGGTGGCAGTTATTTCAGATGATGGAAAGAATAAGTACTACGCAGACTCCATGAAGGGCCGATTCACCATCTCCAGAGACAATTCCAAGAACACGCTGTATCTGCAAATGAGCAGCCTCAGACCTGAGGACACGGCTGTCTATTACTGTGCGAGGGATCTGGAGAATGTGATGATAGAAGTGGCCCTTGAGTCCTGGGGCCAGGGAACCCTGGTCACCGTCTCCTCAG	﻿QVQLVESGGGVVQPGRSLRLSCAASGFSFSTYTMHWVRQTPDKGLEWVAVISDDGKNKYYADSMKGRFTISRDNSKNTLYLQMSSLRPEDTAVYYCARDLENVMIEVALESWGQGTLVTVSS		IGKV1-39	IGKJ4	﻿GACATCCAGATGACCCAGTCTCCATCCTCCCTGTCTGCATCTGTAGGAGACAGAGTCACCATCACTTGCCGGGCAAGTCAGAGCATTAGCAGTTATTTAAATTGGTATCAGCAGAAACCAGGGAAAGCCCCTAAGCTCCTGATCTATGCTGCATCCAGCTTGCAAAGTGGGGTCCCATCAAGGTTCAGTGGCAGTGGATCTGGGACAGATTTCACTCTCACCATCAGCAGTCTGCAACCTGAAGATTTTGCAACTTATTATTGTCAACAGAGTTACACTACCCTCGCGCTTACTTTCGGCGGAGGGACCAAGGTGGAGATCAAAC	﻿DIQMTQSPSSLSASVGDRVTITCRASQSISSYLNWYQQKPGKAPKLLIYAASSLQSGVPSRFSGSGSGTDFTLTISSLQPEDFATYYCQQSYTTLALTFGGGTKVEIK		2.45		>1000	>1000
			C913		12m		clone		IGHV3-43	IGHJ4	﻿GAGGTGCAGCTGGTGGAGTCTGGGGGAGTCGTGGTACAGCCGGGGGGGTCCCTGAGACTCTCTTGTGCAGCCTCTGGATTCACCTTTGACGATTATTCCATGCACTGGGTCCGTCAAGTTCCGGGAAAGGGTCTGGAGTGGATCGCTGTTATTTTTTGGGATGGTACCAGTACATACTATGCAGACTCAGTGAAGGGCCGATTCACCATCTCCAGAGACAACAGCAAAAAGTCCCTGTATTTGCAAATGAACAGCCTGAGAAGTGAGGACACCGCCTTGTATTACTGTGCAAAAGATTCGGAGGATTGTAGTAGTACCAGCTGCTATGTTGACCACTGGGGCCAGGGAACCCTGGTCACCGTCTCCTCAG	﻿EVQLVESGGVVVQPGGSLRLSCAASGFTFDDYSMHWVRQVPGKGLEWIAVIFWDGTSTYYADSVKGRFTISRDNSKKSLYLQMNSLRSEDTALYYCAKDSEDCSSTSCYVDHWGQGTLVTVSS		IGKV4-1	IGKJ2	﻿GACATCGTGATGACCCAGTCTCCAGACTCCCTGGCTGTGTCTCTGGGCGAGAGGGCCACCATCAACTGCAAGTCCAGCCAGAGTGTTTTTTACATCTCCAACAATAAGAACTACTTAGCTTGGTACCAGCAGAAACCAGGACAGCCTCCTAAACTGCTCATTTACTGGGCATCTACCCGGGAGTCCGGGGTCCCTGACCGATTCAGTGGCGGCGGGTCTGGGACAGATTTCACTCTCACCATCAGCAGCCTGCAGGCTGAAGATGTGGCAGTTTATTACTGTCAGCAATATTATAATACTCCTTACACTTTTGGCCAGGGGACCAAGCTGGAGATCAAAC	﻿DIVMTQSPDSLAVSLGERATINCKSSQSVFYISNNKNYLAWYQQKPGQPPKLLIYWASTRESGVPDRFSGGGSGTDFTLTISSLQAEDVAVYYCQQYYNTPYTFGQGTKLEIK		2.58		16.0765	93.2204
			C914		6.2m		singlet		IGHV4-30	IGHJ4	﻿CAGGTGCAGCTGCAGGAGTCGGGCCCAGGACTGGTGAAGCCTTCACAGACCCTGTCCCTCACCTGCACTGTCTCCGGTGGCTCCATCACCAGTGGAGATTACTACTGGACTTGGATCCGCCAGCCCCCAGGGAAGGGCCTGGAGTGGATTGGGTACATCTATTACAGTGGGAACACCTACTACAACCTGTCCCTCAGGAGTCGAATTACAATATCAGAAGACACGTCCAAGAACCAGTTTTCCCTGAAGCTGAGATCTGTGACTGCCGCAGACACGGCCGTGTACTACTGTGCCAGAGCCATGATTACGTTTGGGGGAGTTATCGTCGTCTTAGACTACTGGGGCCAGGGAACCCTGGTCACCGTCTCCTCAG	﻿QVQLQESGPGLVKPSQTLSLTCTVSGGSITSGDYYWTWIRQPPGKGLEWIGYIYYSGNTYYNLSLRSRITISEDTSKNQFSLKLRSVTAADTAVYYCARAMITFGGVIVVLDYWGQGTLVTVSS		IGLV2-8	IGLJ1	﻿CAGTCTGCCCTGACTCAGCCTCCCTCCGCGTCCGGGTCTCCTGGACAGTCAGTCACCATCTCCTGCACTGGAACCAGCACTGACGTTGGTGGTTATAACTTTGTCTCCTGGTACCAACAGCACCCAGGCAAAGCCCCCAAACTCATGATTTATGAGGTCAGTAAGCGGCCCTCAGGGGTCCCTGATCGCTTCTCTGGCTCCAAGTCTGGCAACACGGCCTCCCTGACCGTCTCTGGGCTCCAGGCTGAGGATGAGGCTGATTATTACTGCAGCTCATATGCAGGCAGCAACATCCTTTATGTCTTCGGAACTGGGACCAAGGTCACCGTCCTAG	﻿QSALTQPPSASGSPGQSVTISCTGTSTDVGGYNFVSWYQQHPGKAPKLMIYEVSKRPSGVPDRFSGSKSGNTASLTVSGLQAEDEADYYCSSYAGSNILYVFGTGTKVTVL		1.59		182.761	>1000
			C915		12m		singlet		IGHV4-30	IGHJ4	﻿CAGGTGCAGCTGCAGGAGTCGGGCCCAGGACTGGTGAAGCCTTCACAGACCCTGTCCCTCACCTGCACTGTCTCTGGTGGCTCCATCAGCAGTGGTGATTACTACTGGAGTTGGATCCGCCAGCCCCCAGGGAAGGGCCTGGAGTGGATTGGGTACATCTATTACAGTGACAGCACCTACTACAACCCGTCCCTCAGGACTCGAGTTACCATATCAGTAGACACGTCCAAGAACCAGTTCTCCCTGAAGCTGACCTCTGTGACTGCCGCAGACACGGCCGTGTATTACTGTGCCAGAGCTATGATTACGTTTGGGGGAGTTATCGTCCTCTATGACTACTGGGGCCAGGGAACCCTGGTCACCGTCTCCTCAG	﻿QVQLQESGPGLVKPSQTLSLTCTVSGGSISSGDYYWSWIRQPPGKGLEWIGYIYYSDSTYYNPSLRTRVTISVDTSKNQFSLKLTSVTAADTAVYYCARAMITFGGVIVLYDYWGQGTLVTVSS		IGLV2-8	IGLJ1	﻿CAGTCTGCCCTGACTCAGCCTCCCTCCGCGTCCGGGTCTCCTGGACAGTCAGTCACCATCTCCTGCACTGGAACCAGCAGTGACGTTGGTGGTTATAACTATGTCTCCTGGTACCAACAGCACCCAGGCAAAGCCCCCAAACTCATGATTTATGAGGTCACTAAGCGGCCCTCAGGGGTCCCTGCTCGCTTCTCTGGCTCCAAGTCTGGCAACACGGCCTCCCTGACCGTCTCTGGGCTCCAGGCTGAGGATGAGGCTGATTATTACTGCAGCTCATATGCAGGCAGCATCCTCCTTTATGTCTTCGGAACTGGGACCAAGGTCACCGTCCTAG	﻿QSALTQPPSASGSPGQSVTISCTGTSSDVGGYNYVSWYQQHPGKAPKLMIYEVTKRPSGVPARFSGSKSGNTASLTVSGLQAEDEADYYCSSYAGSILLYVFGTGTKVTVL		3.49		94.4451	>1000
			C916		1.3m		singlet		IGHV3-13	IGHJ4	﻿GAGGTGCAGCTGGTGGAGTCTGGGGGAGGCTTGGTACAGCCTGGGGGGTCCCTGAGACTCTCCTGTGCAGCCTCTGGATTCACCTTCAGTAACTACGACATGCACTGGGTCCGCCAAGCTACAGGAAGAGGTCTGGAGTGGGTCTCAACTATTGGTACTGCTGGTGACACATACTATCCTGGCTCCGTGAAGGGCCGATTCACCATCTCCAGAGAAAATGCCAAGAACTCCTTGTATCTTCAAATGAACAGCCTGAGAGCCGGGGACACGGCTCTGTATTACTGTGCAAGAGTCCGCTATGATAGTAGTGGTTATTTTTGGAGCCTTGACTACTGGGGCCAGGGAACCCTGGTCACCGTCTCCTCAG	﻿EVQLVESGGGLVQPGGSLRLSCAASGFTFSNYDMHWVRQATGRGLEWVSTIGTAGDTYYPGSVKGRFTISRENAKNSLYLQMNSLRAGDTALYYCARVRYDSSGYFWSLDYWGQGTLVTVSS		IGKV1-39	IGKJ2	﻿GACATCCAGATGACCCAGTCTCCATCCTCCCTGTCTGCATCTGTAGGAGACAGAGTCACCATCACTTGCCGGGCAAGTCAGAGCATTAGCAGGTATTTAAATTGGTATCAGCAGAAACCAGGGAAGGCCCCTAAACTCCTGATCTATGCTGCATCCAGTTTGCAAAGTGGGGTCCCATCAAGGTTCAGTGGCAGTGGATCTGGGACAGATTTCACTCTCACCATCAGCGGTCTGCAACCTGAAGATTTTGCAACTTACTACTGTCAACAGAGTTACAGTACCCCTCAGTACACTTTTGGCCAGGGGACCAAGCTGGAGATCAAAC	﻿DIQMTQSPSSLSASVGDRVTITCRASQSISRYLNWYQQKPGKAPKLLIYAASSLQSGVPSRFSGSGSGTDFTLTISGLQPEDFATYYCQQSYSTPQYTFGQGTKLEIK		1.97		>1000	>1000
			C917		12m		singlet		IGHV3-13	IGHJ4	﻿GAGGTGCAGCTGGTGGAGTCTGGGGGAGGCTTGGTACAGCCTGGGGGGTCCCTGAGACTCTCCTGTGCAGCCTCTGGATTCACCTTCAGTAACTACGACATGCACTGGGTCCGCCAAGCTACAGGAAAAGGTCTGGATTGGGTCTCAACTATTGGTACTGCTGGTGACACATACTATCCAGGCTCCGTGAAGGGCCGATTCACCATCTCCAGAGAAAATGCCAAGAACTCCTTGTATCTTCAAATGAACAGCCTGAGAGCCGGGGACACGGCTGTGTATTACTGTGCAAGAGTCCGCTTTGATACTAGTGGTTATTTTTGGAGCCTTGACTACTGGGGCCAGGGAACCCTGGTCACCGTCTCCTCAG	﻿EVQLVESGGGLVQPGGSLRLSCAASGFTFSNYDMHWVRQATGKGLDWVSTIGTAGDTYYPGSVKGRFTISRENAKNSLYLQMNSLRAGDTAVYYCARVRFDTSGYFWSLDYWGQGTLVTVSS		IGKV1-39	IGKJ2	﻿GACATCCAGATGACCCAGTCTCCGTCCTCCCTGTCTGCATCTGTCGGAGACAGAGTCACCATCACTTGCCGGGCAAGTCAGAGCATTAGCAGCTATTTAAATTGGTATCAGCAGAAACCAGGGAAAGCCCCTAAGCTCCTGATCTATGCTGCATCCAGTTTGCAGAGTGGGGTCCCATCAAGGTTCAGTGGCAGTGGATCTGGGACAGATTTCACTCTCACCATCAGCAGTCTGCAACCTGAAGATTTTGCAACTTACTACTGTCAACAGAGTTACAGTAACCCTCAGTACACTTTTGGCCAGGGGACCAAGCTGGAGATCAAAC	﻿DIQMTQSPSSLSASVGDRVTITCRASQSISSYLNWYQQKPGKAPKLLIYAASSLQSGVPSRFSGSGSGTDFTLTISSLQPEDFATYYCQQSYSNPQYTFGQGTKLEIK		1.05		>1000	>1000
			C918		6.2m		singlet		IGHV3-11	IGHJ3	﻿CAGGTGCAGCTGGTGGAGTCTGGGGGCGGCTTGGTCAAGCCTGGAGGGTCCCTGAGACTCTCCTGTACAGCCTCTGGATTCACCTTCAGTGACTACTACATGACCTGGCTCCGCCAGGCTCCAGGGAAGGGGCTGGAGTGGGTTTCATACATTAGTAGTACTAGTCCTTACACAAGCTACGCAGACTCTGTGAAGGGCCGATTCACCATCTCCAGAGACAACGCCAGGAACTCAGTGTATCTGCAAATGAACAGCCTGAGAGCCGAAGATACGGCCATATATTACTGTGCGAGAGTCCCTCCTCCACAGCGGCTGCACCCTTTTGATGTCTGGGGCCAAGGGACAATGGTCACCGTCTCTTCAG	﻿QVQLVESGGGLVKPGGSLRLSCTASGFTFSDYYMTWLRQAPGKGLEWVSYISSTSPYTSYADSVKGRFTISRDNARNSVYLQMNSLRAEDTAIYYCARVPPPQRLHPFDVWGQGTMVTVSS		IGKV1-5	IGKJ1	﻿GACATCCAGATGACCCAGTCTCCTTCCACCCTGTCTGCATCTGTAGGAGACAGAGTCACCATCACTTGCCGGGCCAGTCAGAGTATTAGTAGCTGGTTGGCCTGGTATCAGCAGAAACCCGGGAAAGCCCCTAAGCTCCTGATCTATCAGGCGTCTAGTTTAGAAAGTGGGGTCCCATCAAGGTTCAGCGGCAGTGGATCTGGGACAGATTTCACTCTCACCATCAGCAGCCTGCAGCCTGATGATTTTGCAACTTATTACTGCCAACAATATTTTCGTTATTCGTGGACGTTCGGCCAAGGGACCAAGGTGGAAATCAA	﻿DIQMTQSPSTLSASVGDRVTITCRASQSISSWLAWYQQKPGKAPKLLIYQASSLESGVPSRFSGSGSGTDFTLTISSLQPDDFATYYCQQYFRYSWTFGQGTKVEI		1.78		3.6618	16.0567
			C919		12m		singlet		IGHV3-11	IGHJ3	﻿CAGGTGCAGCTGGTGGAGTCTGGGGGAGGCTTGGTCAAGCCTGGGGGGTCCCTGAGACTCTCCTGTACAGCCTCTGGATTCACCTTCAGTGACTACTACATGACCTGGCTCCGCCAGGCTCCAGGGAAGGGGCTGGAGTGGGTTTCATACATTAGTAGTACTAGTCCTTACACAAGCTACGCAGACTCTGTGAAGGGCCGATTCACCATCTCCAGAGACAACGCCAGGAACTCAGTGTATCTGCAAATGAACAGCCTGAGAGCCGAAGATACGGCCGTATATTACTGTGCGAGAGTCCCTCCTCCACAGCGGCTGCACCCTTTTGATGTCTGGGGCCAAGGGACAATGGTCACCGTCTCTTCAG	﻿QVQLVESGGGLVKPGGSLRLSCTASGFTFSDYYMTWLRQAPGKGLEWVSYISSTSPYTSYADSVKGRFTISRDNARNSVYLQMNSLRAEDTAVYYCARVPPPQRLHPFDVWGQGTMVTVSS		IGKV1-5	IGKJ1	﻿GACATCCAGATGACCCAGTCTCCTTCCACCCTGTCTGCATCTGTAGGAGACAGAGTCACCATCACTTGCCGGGCCAGTCAGAGTATTAGTAGCTGGTTGGCCTGGTATCAGCAGAAACCCGGGAAAGCCCCTAAGCTCCTGATCTTTAAGGCGTCTAGTTTAGAAAGTGGGGTCCCATCAAGGTTCAGCGGCAGTGGATCTGGGACAGATTTCACTCTCACCATCAGCAGCCTGCAGCCTGATGATTTTGCAACTTATTACTGCCAACAGTATTTTCGTTATTCGTGGACGTTCGGCCAAGGGACCAAGGTGGAAATCAA	﻿DIQMTQSPSTLSASVGDRVTITCRASQSISSWLAWYQQKPGKAPKLLIFKASSLESGVPSRFSGSGSGTDFTLTISSLQPDDFATYYCQQYFRYSWTFGQGTKVEI		2.31		3.57165	13.1854
			C920		6.2m		singlet		IGHV4-39	IGHJ4	﻿CAGCTGCAGCTGCAGGAGTCGGGCCCAGGACTGGTGAAGCCTTCGGAGACCCTGTCCCTCACCTGCGCTGTCTCTGGTGGCTCCATCAGCAATAGTCCTTTCTACTGGGGCTGGATCCGCCAGCCCCCCGGGAAGGGGCTGGAGTGCATTGGGAGCATCTATTATAGTGGGAGCACCTACTACAACCCGTCCCTCAAGAGTCGAGTCACCATATCCGTAGACACGTCCAAGAAGCAGTTCTCCCTGAAGCTGAGCTCTGTGACCGCCGCAGACACGGCTGTGTATTACTGTGCGAGACATTTTGCCGATGGGTCGGGGAGAGTGGTTGACTCCTGGGGCCAGGGAATCCTGGTCACCGTCTCCTCAG	﻿QLQLQESGPGLVKPSETLSLTCAVSGGSISNSPFYWGWIRQPPGKGLECIGSIYYSGSTYYNPSLKSRVTISVDTSKKQFSLKLSSVTAADTAVYYCARHFADGSGRVVDSWGQGILVTVSS		IGKV3-11	IGKJ2	﻿GAAATTGTGTTGACACAGTCTCCAGCCACCCTGTCTTTGTCTCCAGGGGAAAGAGCCACCCTCTCCTGCAGGGCCAGTCAGAGTGTTAGCAGCTACTTAGCCTGGTACCAACAAAAACCTGGCCAGGCTCCCAGCCTCCTCATCTATGATGTATCCAACAGGGCCACTGGCATCCCAGCCAGGTTCAGTGGCAGTGGGTCTGGGACAGACTTCACTCTCACCATCAGCAGCCTAGAGCCTGAAGATTTTGCAGTTTATTACTGTCAGCAGCGTATCAACTGGCCCTTGTACACTTTTGGCCAGGGGACCAAGCTGGAGATCAAAC	﻿EIVLTQSPATLSLSPGERATLSCRASQSVSSYLAWYQQKPGQAPSLLIYDVSNRATGIPARFSGSGSGTDFTLTISSLEPEDFAVYYCQQRINWPLYTFGQGTKLEIK		2.35		10.4712	176.405
			C921		12m		singlet		IGHV4-39	IGHJ4	﻿CAGCTGCAGCTGCAGGAGTCGGGCCCAGGACTGGTGAAGCCTTCGGAGACCCTGTCCCTCACCTGCGCTGTCTCTGGTGGCTCCATCAGCAATAGTCCTTTCTACTGGGCCTGGATCCGCCAGCCCCCAGGGAAGGGGCTGGAGTGCATTGGGAGCATCTATTATACTGGGAGCACCTACTACAACCCGTCCCTCAAGAGTCGAGTCACCATATCCGTAGACACGTCCACGAAGCAGTTCTCCCTGAAGCTGAGGTCTGTGACCGCCGCAGACACGGCTGTGTATTACTGTGCGAGACATTTTGCCGATGGTTCGGGGAGAGTGGTTGACTACTGGGGCCAGGGAACCCTGGTCACCGTCTCCTCAG	﻿QLQLQESGPGLVKPSETLSLTCAVSGGSISNSPFYWAWIRQPPGKGLECIGSIYYTGSTYYNPSLKSRVTISVDTSTKQFSLKLRSVTAADTAVYYCARHFADGSGRVVDYWGQGTLVTVSS		IGKV3-11	IGKJ2	﻿GAAATTGTGTTGACACAGTCTCCAGCCACCCTGTCTTTGTCTCCAGGGGAGAGAGCCACCCTCTCCTGCAGGGCCAGTCAGAGTGTTACCACCTACTTAGCCTGGTACCAACAGAAACCTGGCCAGGCTCCCAGGCTCCTCATCTATGATGTTTCCAGCAGGGCCACTGGCATCCCAGCCAGGTTCAGTGGCAGTGGGTCTGGGACAGACTTCACTCTCACCATCAGCAGCCTCGAGCCTGAAGACTTTGCAGTTTATTACTGTCAGCAGCGTAGCAACTGGCCCTTGTACACTTTTGGCCAGGGGACCAAGCTGGAGATCAAAC	﻿EIVLTQSPATLSLSPGERATLSCRASQSVTTYLAWYQQKPGQAPRLLIYDVSSRATGIPARFSGSGSGTDFTLTISSLEPEDFAVYYCQQRSNWPLYTFGQGTKLEIK		3.91		233.087	>1000
			C922		6.2m		singlet		IGHV3-11	IGHJ4	﻿CAGGTGCAGCTGGTGGAGTCTGGGGGAGGCTTGGTCAAGCCTGGAGGGTCCCTGAGACTCTCCTGTGCAGGCTCTGGATTCACCTTCACTGACTACTACATGGCCTGGATCCGCCAGGCTCCAGGGAAGGGGTTGGAGTGGGTTTCATACATTAGTACTAGTGATAGATTCATAAATTACGCAGACTCTGTGAAGGGCCGATTCACCATCTCCAGAGACGACGCCAAGAATTCACTGTATCTGCAAATGAATAGCCTGAGAGCCGAGGACACGGCCGTGTATTATTGTGCGAGAGATGGCGGTGGCTACGATCGGTTTGACCACTGGGGCCAGGGAACCCTGGTCACCGTCTCCTCAG	﻿QVQLVESGGGLVKPGGSLRLSCAGSGFTFTDYYMAWIRQAPGKGLEWVSYISTSDRFINYADSVKGRFTISRDDAKNSLYLQMNSLRAEDTAVYYCARDGGGYDRFDHWGQGTLVTVSS		IGKV1-33	IGKJ2	﻿GACATCCAGATGACCCAGTCTCCATCCTCCCTGTCTGCATCTGTGGGAGACAGAGTCACCATCACTTGCCAGGCGAGTCAGGACATTAGCAACTTATTAAATTGGTATCAACAGAAAGCAGGGAAAGCCCCTAAGCTCCTGATCTACGATGCATCCAATTTGGAAACAGGGGTCCCATCAAGGTTCAGTGGAAGTGGATCTGGGACAGACTTTACTTTCACCATCAGCAGCCTGCAGCCTGAAGATATTGCAACATATTACTGTCTACAGTATGATAATCTCCCTCTGACTTTTGGCCAGGGGACCAAGCTGGAGATCAAAC	﻿DIQMTQSPSSLSASVGDRVTITCQASQDISNLLNWYQQKAGKAPKLLIYDASNLETGVPSRFSGSGSGTDFTFTISSLQPEDIATYYCLQYDNLPLTFGQGTKLEIK		2.42		2.34359	11.5779
			C923		12m		singlet		IGHV3-11	IGHJ4	﻿CAGGTGCAGCTGGTGGAGTCTGGGGGAGGCTTGGTCAAGCCTGGAGGGTCCCTGAGACTCTCCTGTGCAGCCTCTGGATTCACCTTCAGTGACTACCACATGACCTGGATCCGCCAGGCTCCAGGGAAGGGGCTGGAGTGGGTTTCATACATTAGTAATAGAAGTACTTACAGAAATTATGCAGACTCTGTGAAGGGCCGATTCACTATCTCCAGAGACAACGCCAAGAACTCACTGTATCTGCAAATGAACAGCCTGAGAGCCGAGGACACGGCCGTGTATTACTGTGCGAGAGATGGCGGTGCCTACGATCGGTTTGACTACTGGGGCCAGGGAACCCTGGTCACCGTCTCCTCAG	﻿QVQLVESGGGLVKPGGSLRLSCAASGFTFSDYHMTWIRQAPGKGLEWVSYISNRSTYRNYADSVKGRFTISRDNAKNSLYLQMNSLRAEDTAVYYCARDGGAYDRFDYWGQGTLVTVSS		IGKV1-33	IGKJ2	﻿GACATCCAGATGACCCAGTCTCCATCCTCCCTGTCTGCATCTGTAGGAGACAGAGTCACCATCACTTGCCAGGCGAGTCAGGACATTAAGAAGTTTTTAAATTGGTATCAGCAGAAACCAGGGAAAGCCCCTAAGCTCCTGATCTACGATGCATCCAATTTGGAGACAGGGGTCCCATCAAGGTTCAGTGGAAGTGGATCTGGGACAGATCTTACTTTCACCATCAGCAGCCTGCAGCCTGAAGATATTGCAACATATTACTGTCAACAATATGATAATCTCCCTCTGACTTTTGGCCAGGGGACCAAGCTGGAGATCAAAC	﻿DIQMTQSPSSLSASVGDRVTITCQASQDIKKFLNWYQQKPGKAPKLLIYDASNLETGVPSRFSGSGSGTDLTFTISSLQPEDIATYYCQQYDNLPLTFGQGTKLEIK		1.95		2.80606	26.115
			C924		1.3m		singlet		IGHV3-30	IGHJ5	﻿CAGGTGCAGCTGGTGGAGTCTGGGGGAGGCGTGGTCCAGCCTGGGAGGTCCCTGAGACTCTCCTGTGCAGCCTCTGGATTCACCTTCAGTAGCTATGGCATGCACTGGGTCCGCCAGGCTCCAGGCAAGGGGCTGGAGTGGGTGGCAGTTATATCAGATGATGGAAGTAATAAATACTATGCAGACTCCGTGAAGGGCCGATTCACCATCTCCAGAGACAATTCCAAGAACACGCTGTATCTGCAAATGAACAGCCTGAGAGCTGAGGACACGGCTGTGTATTATTGTGCGAAAAGTTGGTGGTTATCAGAGAACTGGTTCGACCCCTGGGGCCAGGGAACCCTGGTCACCGTCTCCTCAG	﻿QVQLVESGGGVVQPGRSLRLSCAASGFTFSSYGMHWVRQAPGKGLEWVAVISDDGSNKYYADSVKGRFTISRDNSKNTLYLQMNSLRAEDTAVYYCAKSWWLSENWFDPWGQGTLVTVSS		IGKV3-15	IGKJ4	﻿GAAATAGTGATGACGCAGTCTCCAGCCACCCTGTCTGTGTCTCCAGGGGAAAGAGCCACCCTCTCCTGCAGGGCCAGTCAGAGTGTTAGCAGCAACTTAGCCTGGTACCAGCAGAAACCTGGCCAGGCTCCCAGGCTCCTCATCTATGGTGCATCCACCAGGGCCACTGGTATCCCAGCCAGGTTCAGTGGCACTGGGTCTGGGACAGAGTTCACTCTCACCATCAGCAGCCTGCAGTCTGAAGATTTTGCAGTTTATTACTGTCAGCAGTATAATAACTGGCCTCTCACTTTCGGCGGAGGGACCAAGGTGGAGATCAAAC	﻿EIVMTQSPATLSVSPGERATLSCRASQSVSSNLAWYQQKPGQAPRLLIYGASTRATGIPARFSGTGSGTEFTLTISSLQSEDFAVYYCQQYNNWPLTFGGGTKVEIK		2.5		90.5574	902.657
			C925		12m		singlet		IGHV3-30	IGHJ5	﻿CAGGTGCAGCTGGTGGAGTCTGGGGGAGGCGTGGTCCAGCCTGGGAGGTCCCTGAGACTCTCCTGTGCAGCCTCTGGATTCACCTTCAGTAACTATGGGTTACACTGGGTCCGCCAGGCTCCAGGCAAGGGACTGGAGTGGGTGGCAGTTACATCAGATGATGGAAATAGAAAATACTATGCAGACTCCGTGAAGGGCCGATTCACCATCTCCAGAGACGATTCCAAGAACACATTGTATCTGCAGATGAACAACCTGAGAACTGAGGACACGGCTGTGTATTACTGTGCGAAAAGTTGGTGGTTATCAGAGAACTGGTTCGACCCCTGGGGCCAGGGAACCCTGGTCACCGTCTCCTCAG	﻿QVQLVESGGGVVQPGRSLRLSCAASGFTFSNYGLHWVRQAPGKGLEWVAVTSDDGNRKYYADSVKGRFTISRDDSKNTLYLQMNNLRTEDTAVYYCAKSWWLSENWFDPWGQGTLVTVSS		IGKV3-15	IGKJ4	﻿GAAATAGTGATGACGCAGTCTCCAGCCACCCTGTCTGTGTCTCCAGGGGAAAGAGCCACCCTCTCCTGCAGGGCCAGTCAGAGTGTTAGAAGCAACTTAGCCTGGTACCAGCAGAGACCTGGCCAGGCTCCCAGGCTCCTCATCTATGGTGCATTCACCAGGGCCACTGGTATCCCAGCCAGGTTCAGTGTCAGTGGGTCTGGGACAGAGTTCACTCTCACCATCGACAGCCTGCAGTCTGAAGATTTTGCAGTTTATTACTGTCAGCAGTATAATAACTGGCCTCTCACTTTCGGCGGAGGGACCAAGGTGGAGATCAAAC	﻿EIVMTQSPATLSVSPGERATLSCRASQSVRSNLAWYQQRPGQAPRLLIYGAFTRATGIPARFSVSGSGTEFTLTIDSLQSEDFAVYYCQQYNNWPLTFGGGTKVEIK		2.26		38.0346	222.872
			C926		12m		clone		IGHV3-30	IGHJ4	﻿CAGGTGCAGCTGGTGGAGTCTGGGGGAGGCGTGGTCCAGCCTGGGAGGTCCCTGAGACTCTCCTGTGCAGCCTCTGGATTCGGCCTCATTACCTATTCTATGCACTGGGTCCGCCAGGCTCCAGGCAAGGGGCTGGAGTGGGTGGGACTTATATCATTTGATGGAAACACTACATACTACGCAGACTCCGTGAGGGGCCGATTCACCATCTCCAGAGACAATTTGGCGAACATTCTGTATCTCCAAATGAACAGCCTGAGACCTGACGACACGGCTTTGTATTACTGTGCGAGAGATAAGAGGGGGGTGATTCGGGGCCTTCTTAACTTCTGGGGCCAGGGATCCCTGGTCACCGTCTCCTCAG	﻿QVQLVESGGGVVQPGRSLRLSCAASGFGLITYSMHWVRQAPGKGLEWVGLISFDGNTTYYADSVRGRFTISRDNLANILYLQMNSLRPDDTALYYCARDKRGVIRGLLNFWGQGSLVTVSS		IGKV4-1	IGKJ4	﻿GACATCGTGATGACCCAGTCTCCAGACTCCCTGGCTGTGTCTCTGGGCGAGAGGGCCACCATCAACTGCAAGTCCAGCCAGAGTCTTTTACCCAGCTCCAACAGCAACAATTACTTAGCTTGGTACCAGCAGAAATCAGGACAGCCTCCTAACCTGCTCATTTACTGGGCATCTACCCGGGAATCCGGGGTCCCTGACCGATTCAGTGGCAGCGGGTCTGAGACAGATTTCAGTCTCACCATCAGCAACCTGCAGGCTGAAGATGTGGCAGTTTATTACTGTCAACAATATTATAATACTCCTCACACTTTCGGCGGAGGGACCAAGGTGGAAATCA	﻿DIVMTQSPDSLAVSLGERATINCKSSQSLLPSSNSNNYLAWYQQKSGQPPNLLIYWASTRESGVPDRFSGSGSETDFSLTISNLQAEDVAVYYCQQYYNTPHTFGGGTKVEI		4.72		4.01228	20.3279
			C927		6.2m		singlet		IGHV3-30	IGHJ4	﻿CAGGTGCAGCTGGTGGAGTCTGGGGGAGGCGTGGTCCAGCCTGGGAGGTCCCTGAGACTCTCCTGTGTAGCCTCTGGATTCACCTTCAGTTACTTTGACATGCACTGGGTCCGCCAGGCTCCAGGCAAGGGGTTGGAGTGGGTGGCACTTATATCACATGATGGAAGTACTACATTCTATGGAGACTCCGCGAGGGGCCGATTCACCATCTCCAGAGACAATTCCAGGAACACGCTGGATTTGCAAATGAACAGCCTGAGACCTGAGGACACGGCTGTGTATTTCTGTGCGAAACCTGTGGATGCAGCTATGTTTGACTTCTGGGGCCAGGGAACCCTGGTCACCGTCTCCTC	﻿QVQLVESGGGVVQPGRSLRLSCVASGFTFSYFDMHWVRQAPGKGLEWVALISHDGSTTFYGDSARGRFTISRDNSRNTLDLQMNSLRPEDTAVYFCAKPVDAAMFDFWGQGTLVTVS		IGLV3-21	IGLJ2	﻿TCCTATGAGCTGACTCAGCCACCCTCAGTGTCAGTGGCCCCAGGAAAGACGGCCAGGATTACCTGTGGGGGCAACAACATTGGAAGTAAAAGTGTGCACTGGTACCAGCAGAGGCCAGGCCAGGCCCCTGTGTTGGTCATCTATTATGATTCCGACCGGCCCTCTGGGATCCCTGAGCGATTCTCTGGCTCCAACTCTGGAAACACGGCCACCCTGACCATCAGCAGGGTCGAAGCCGGGGATGAGGCCGACTTCTACTGTCAGGTGTGGGATAGGAGTACTAATCATCTTGTGGTATTCGGCGGAGGGACCCAGCTGACCGTCCTAG	﻿SYELTQPPSVSVAPGKTARITCGGNNIGSKSVHWYQQRPGQAPVLVIYYDSDRPSGIPERFSGSNSGNTATLTISRVEAGDEADFYCQVWDRSTNHLVVFGGGTQLTVL		3.77		267.247	>1000
			C928		12m		singlet		IGHV3-30	IGHJ4	﻿CAGGTGCAGCTGGTGGAGTCTGGGGGAGGCGTGGTCCAGCCTGGGAGGTCCCTGAGACTCTCCTGTGCAGCCTCTGGATTCACCTTCAGTTTCTTTGACATGCACTGGGTCCGCCAGGCTCCAGGCAAGGGGCTGGAGTGGGTGGCCGATATTTCATATGATGGAAGTAATCAATACTATGGAGACTCCGTGAAGGGCCGATTCACCATCTCCAGAGACAATTCCAAGAGCACCTTGTATCTGCAAATGAACAGCCTGAGAGCTGAGGACACGGCTGTCTATTACTGTGCGAAACCAGTGGATACAGCTATGTTTGACTCCTGGGGCCAGGGAACCCTGGTCACCGTCTCCTCAG	﻿QVQLVESGGGVVQPGRSLRLSCAASGFTFSFFDMHWVRQAPGKGLEWVADISYDGSNQYYGDSVKGRFTISRDNSKSTLYLQMNSLRAEDTAVYYCAKPVDTAMFDSWGQGTLVTVSS		IGLV3-21	IGLJ2	﻿TCCTATGAGCTGACTCAGCCACCCTCAGTGTCAGTGGCCCCAGGAGAGACGGCCAGGATTACCTGTGGGGGAAACAACATTGGACATAAAAGTGTGCACTGGTACCAGCAGCAGCCAGGCCAGGCCCCTGTGTTGGTCATCTATTATGATAGCGAGCGGCCCTCAGGGATCCCTGAACGATTCTCTGGCTCCAACTCTGGGAACACGGCCACCCTGACCATCAGCAGGGTCGAAGCCGGGGATGAGGCCGACTATCACTGTCAGGTGTGGGATGGTGGTAATGATCATCTTGTGATATTCGGCGGAGGGACCAAGCTGACCGTCCTAG	﻿SYELTQPPSVSVAPGETARITCGGNNIGHKSVHWYQQQPGQAPVLVIYYDSERPSGIPERFSGSNSGNTATLTISRVEAGDEADYHCQVWDGGNDHLVIFGGGTKLTVL		4.14		89.5337	>1000
			C929		1.3m		singlet		IGHV3-53	IGHJ6	﻿GAGGTGCAGCTGGTGGAGTCTGGAGGAGGCTTGATCCAGCCTGGGGGGTCCCTGAGACTCTCCTGTGCAGCCTCTGGGTTCACCGTCAGTAGCAACTACATGACCTGGGTCCGCCAGGCTCCAGGGAAGGGGCTGGAGTGGGTCTCAGTTATTTATAGCGGTGGTACCACATACTACGCAGACTCCGTGAAGGGCCGATTCACCATCTCCAGAGACAATTCCAAGAACACACTGTATCTTCAAATGAACAGCCTGAGAGCCGAGGACACGGCCGTGTATTACTGTGCGAGAGATTTGGTGGTTTGGGGGATGGACGTCTGGGGCCAAGGGACCACGGTCACCGTCTCCTCA	﻿EVQLVESGGGLIQPGGSLRLSCAASGFTVSSNYMTWVRQAPGKGLEWVSVIYSGGTTYYADSVKGRFTISRDNSKNTLYLQMNSLRAEDTAVYYCARDLVVWGMDVWGQGTTVTVSS		IGKV1-9	IGKJ2	﻿GACATCCAGTTGACCCAGTCTCCATCCTTCCTGTCTGCATCTGTAGGAGACAGAGTCACCATCACTTGCCGGGCCAGTCAGGGCATTAGCAGTTATTTAGCCTGGTATCAGCAAAAACCAGGGAAAGCCCCTAAGCTCCTGATCTATGCTGCATCCACTTTGCAAAGTGGGGTCCCATCAAGGTTCAGCGGCAGTGGATCTGGGACAGAATTCACTCTCACAATCAGCAGCCTGCAGCCTGAAGATTTTGCAACTTATTACTGTCAACTCCTTAATAGTTACCCGTACACTTTTGGCCAGGGGACCAAGCTGGAGATCAAAC	﻿DIQLTQSPSFLSASVGDRVTITCRASQGISSYLAWYQQKPGKAPKLLIYAASTLQSGVPSRFSGSGSGTEFTLTISSLQPEDFATYYCQLLNSYPYTFGQGTKLEIK		2.07		7.81304	42.1654
			C930		12m		singlet		IGHV3-53	IGHJ6	﻿GAGGTGCAGCTGGTGGAGTCTGGAGGAGGCTTGTTCCAGCCGGGGGGGTCCCTGAGACTCGCCTGTGCAGCCTCTGGGATCACCGTCAGTAGCAACTACATGAGCTGGGTCCGCCAGCCTCCAGGGAAGGGGCTGGAGTGGGTCTCAGTTATTTATGCCGGCGGTAGCACATTCTACGCAGACTCCGTGAAGGGCCGACTCACCATCTCCAGAGACAATTCCAAGAACACGCTGTATCTTCAAATAAACAGCCTGAGAGCCGAGGACACGGCCGTGTATTACTGTGCGAGAGATTTGGTGGTTTGGGGGATGGACGTCTGGGGCCAAGGGACCACGGTCACCGTCTCCTCA	﻿EVQLVESGGGLFQPGGSLRLACAASGITVSSNYMSWVRQPPGKGLEWVSVIYAGGSTFYADSVKGRLTISRDNSKNTLYLQINSLRAEDTAVYYCARDLVVWGMDVWGQGTTVTVSS		IGKV1-9	IGKJ2	﻿GACATCCAGTTGACCCAGTCTCCATCCTTCCTGTCTGCATCTGTAGGAGACAGAGTCACCATCACTTGCCGGGCCAGTCAGGGCATTAGCAGTTATTTAGCCTGGTATCAGCAAAAACCAGGGAAAGCCCCTAAGCTCCTGATCTATGCTGCATCCACTTTGCAAAGTGGGGTCCCATCAAGGTTCAGCGGCAGTGGATCTGGGACAGAATTCACTCTCACAATCAGCAGCCTGCAGCCTGAAGATTTTGCGACTTATTACTGTCAACAGCTGAATACTTACCCGTACACTTTTGGCCAGGGGACCAAGCTGGAGATCAAAC	﻿DIQLTQSPSFLSASVGDRVTITCRASQGISSYLAWYQQKPGKAPKLLIYAASTLQSGVPSRFSGSGSGTEFTLTISSLQPEDFATYYCQQLNTYPYTFGQGTKLEIK		1.24		12.2484	49.589
			C931		6.2m		singlet		IGHV3-30	IGHJ6	﻿CAGGTGCAGCTGGTGGAGTCTGGGGGAGGCGTGGTCCAGCCTGGGAGGTCCCTGAGACTCTCCTGTGCAGCCTCTGGATTCAGCTTCAGTACCTATGGCATGCACTGGGTCCGCCAGGCTCCTGGCAAGGGGCTGGAGTGGGTAGCAGTCATATCATTTGATGGAAGTCAGAAATACTATGGAGACTCCGTGAAGGGCCGATTCACCATCTCCAGAGACAATCCCAAGAACACGCTGGATCTGCAAATGAACAGCCTGAGAGCTGAGGACACGGCTGTGTATTACTGTGCGAAAGTTGTGGTTCGGGGAGTTATTATAAGTCTCTATTACGGTATGGACGTCTGGGGCCAAGGGACCACGGTCACCGTCTCCTCA	﻿QVQLVESGGGVVQPGRSLRLSCAASGFSFSTYGMHWVRQAPGKGLEWVAVISFDGSQKYYGDSVKGRFTISRDNPKNTLDLQMNSLRAEDTAVYYCAKVVVRGVIISLYYGMDVWGQGTTVTVSS		IGLV3-1	IGLJ2	﻿TCCTATGAGCTGACACAGCCACCCTCAGTGTCCGTGTCCCCAGGACAGACAGCCAGCATCACCTGCTCTGGAGATAAATTGGGGGATAAATCTGCTTGCTGGTATCAGCAGAAGCCAGGCCAGTCCCCTGTGCTGGTCATCTATCAAGATAACAAGCGGCCCTCAGGGATCCCTGAGCGATTCTCTGGCTCCAACTCTGGAAACACAGCCACTCTGACCATCAGCGGGACCCAGGCTATGGATGAGGCTGACTATTACTGTCAGGCGTGGGACAGCAGCACTGCCGTTTTCGGCGGGGGGACCAAGCTGACCGTCCTAG	﻿SYELTQPPSVSVSPGQTASITCSGDKLGDKSACWYQQKPGQSPVLVIYQDNKRPSGIPERFSGSNSGNTATLTISGTQAMDEADYYCQAWDSSTAVFGGGTKLTVL		2.57		5.48285	117.463
			C932		12m		singlet		IGHV3-30	IGHJ6	﻿CAGGTGCAGCTGGTGGAGTCGGGGGGAAGCGTGGTCCAGCCTGGGAAGTCCCTGAGACTCTCCTGTGCAGGCTCTGGATTCGCCTTCAGCACCTATGGCATGCACTGGGTCCGCCAGGCTCCAGGCAAGGGCCTGGAGTGGGTGGCAGTTATATCATCTGATGGAGGTAATAAATACTATGCAGACTCCGTGAAGGGCCGATTCACCATCTCCAGAGACAACTACGAGAACACGTTGTATCTGCAAATGAACAGTCTGGGAGCTGAAGACACGGCTGTTTATTACTGTGCGAAAGTGGCACTTCGGGGAGTTTTTATAAGTCTCTACTACGGTATGGACGTCTGGGGCCAAGGGACCACGGTCACCGTCTCCTCA	﻿QVQLVESGGSVVQPGKSLRLSCAGSGFAFSTYGMHWVRQAPGKGLEWVAVISSDGGNKYYADSVKGRFTISRDNYENTLYLQMNSLGAEDTAVYYCAKVALRGVFISLYYGMDVWGQGTTVTVSS		IGLV3-1	IGLJ2	﻿TCCTATGAGCTGACTCAGCCACCCTCAGTGTCCGTGACCCCGGGACAGACAGCCAGCATCACCTGCTCTGGAGATAAATTGGGGGATAAATATGCTTGTTGGTTTCTTCAGAAGCCAGGCCAGTCCCCTCTGTTGGTCATCTATCAAGATACCAAGCGGCCCTCAGGGATCCCAGACCGACTCTCTGGCTCCAAGTCTGGGAACACAGCCACTCTGACCATCAGCGGGACCCAGGCTATGGATGAGGCTGACTATTACTGTCAGACGTGGGACAGCAGTGCTGTGGTTTTCGGCGGAGGGACCAAACTGACCGTCCT	﻿SYELTQPPSVSVTPGQTASITCSGDKLGDKYACWFLQKPGQSPLLVIYQDTKRPSGIPDRLSGSKSGNTATLTISGTQAMDEADYYCQTWDSSAVVFGGGTKLTV		3.57		3.62383	17.9231
			C933		1.3m		singlet		IGHV1-2	IGHJ6	﻿CAGGTGCAGCTGGTGCAGTCTGGGGCTGAGGTGAAGAAGCCTGGGGCCTCAGTGAAGGTCTCCTGCAAGGCTTCTGGATACACCTTCACCGACTACTATATACACTGGGTGCGACAGGCCCCTGGACAAGGGCTTGAGTGGATGGGATGGATCAATCCTAACAGTGGTGGCACAAACTATGCACAGAAGTTTCAGGGCAGGGTCACCATGACCAGGGACACGTCCATCAGCACAGCCTACATGGAGCTGAGCAGGCTGAGATCTGACGACACGGCCGTGTATTACTGTGCGAGAGACGTTATAGTTAGTATGGTTCGGGGAGTTATTTTCCGTATGGACGTCTGGGGCCAAGGGACCACGGTCACCGTCTCCTCA	﻿QVQLVQSGAEVKKPGASVKVSCKASGYTFTDYYIHWVRQAPGQGLEWMGWINPNSGGTNYAQKFQGRVTMTRDTSISTAYMELSRLRSDDTAVYYCARDVIVSMVRGVIFRMDVWGQGTTVTVSS		IGLV1-44	IGLJ2	﻿CAGTCTGTGCTGACTCAGCCACCCTCAGCGTCTGGGACCCCCGGGCAGAGGGTCACCATCTCTTGTTCTGGAAGCAGCTCCAACATCGGAAGTAATACTGTAAACTGGTACCAGCAGCTCCCAGGAACGGCCCCCAAACTCCTCATCTATAGTAATAATCAGCGGCCCTCAGGGGTCCCTGACCGATTCTCTGTCTCCAAGTCTGGCACCTCAGCCTCCCTGGCCATCAGTGGGCTCCAGTCTGAGGATGAGGCTGATTATTACTGTGCAGCATGGGATGACAGTCTGAATGGAGTGGTATTCGGCGGAGGGACCAAGCTGACCGTCCTAG	﻿QSVLTQPPSASGTPGQRVTISCSGSSSNIGSNTVNWYQQLPGTAPKLLIYSNNQRPSGVPDRFSVSKSGTSASLAISGLQSEDEADYYCAAWDDSLNGVVFGGGTKLTVL		1.77		9.85252	157.734
			C934		12m		singlet		IGHV1-2	IGHJ6	﻿CAGGTGCAGCTGGTGCAGTCTGGGGCTGAGGTGAAGAAGCCTGGGGCCTCAGTGAAGGTCTCCTGCAAGGCTTCTGGATACACCTTCACCGACTACTATATACACTGGGTGCGACAGGCCCCTGGACAAGGGCTTGAGTGGATGGGATGGATCAACCCTAACAGTGGTGGCACAAACTATGCACAGAAATTTCAGGGCAGGGTCACCATGACCAGGGACACGTCCATCAGCACAGCCTACATGGACCTGAGCAGGCTGAGATCTGACGACACGGCCGTGTATTACTGTGCGAGAGACGTTATAATTACTATGGGTCGGGGAGTTGTATTCCGGATGGACGTCTGGGGCCAAGGGACCACGGTCACCGTCTCCTCA	﻿QVQLVQSGAEVKKPGASVKVSCKASGYTFTDYYIHWVRQAPGQGLEWMGWINPNSGGTNYAQKFQGRVTMTRDTSISTAYMDLSRLRSDDTAVYYCARDVIITMGRGVVFRMDVWGQGTTVTVSS		IGLV1-44	IGLJ2	﻿CAGTCTGTGCTGACTCAGCCACCCTCAGCGTCTGGGACCCCCGGGCAGAGGGTCACCATCTCTTGTTCTGGAAGCAGCTCCAATATCGGAAATAATACTGTAAACTGGTACCAGCAGTTCCCAGGAACGGCCCCCAAACTCCTCATCCATAGTAATAATCAGCGGCCCTCAGGGGTCCCTGACCGATTCTCTGGCTCCAAGTCTGGCACCTCAGCCTCCCTGGCCATCAGTGGGCTCCAGTCTGAGGATGAGGCTGATTATTACTGTGCAGCATGGGATGACAGCCTGAATGGTGTGGTATTCGGCGGAGGGACCAAGCTGACCGTCCTAG	﻿QSVLTQPPSASGTPGQRVTISCSGSSSNIGNNTVNWYQQFPGTAPKLLIHSNNQRPSGVPDRFSGSKSGTSASLAISGLQSEDEADYYCAAWDDSLNGVVFGGGTKLTVL		0.95		8.52174	86.9477
			C935		12m		clone		IGHV3-33	IGHJ3	﻿CAGGTGCAGCTGGTGGAGTCTGGGGGAGGCGTGGTCCAGCCTGGGAGGTCCCTGAGACTCTCCTGTGCAGCGACTGGATTCACTTTCAGTAGTTATGGCATGCACTGGGTCCGCCAGGCTCCAGGCAAGGGGCTGGAGTGGGTGGCACTGATATGGTATGACGGAAGTAATCAATACTATGTAGACTCCGTGAAGGGCCGATTCACCATCTCCAGAGACAATTCCAAGAAGACGCTGTACCTGCAAATGAACAGCCTGAGAGTCGAGGACACGGCTGTATATTACTGTGCGAGAGATTTTAGCAATTCAGATATGGTAACTTTAAGCGATGCTTTTGATATCTGGGGCCAAGGGACAATGGTCACCGTCTCTTCAG	﻿QVQLVESGGGVVQPGRSLRLSCAATGFTFSSYGMHWVRQAPGKGLEWVALIWYDGSNQYYVDSVKGRFTISRDNSKKTLYLQMNSLRVEDTAVYYCARDFSNSDMVTLSDAFDIWGQGTMVTVSS		IGKV1-9	IGKJ3	﻿GACATCCAGTTGACCCAGTCTCCATCCTTCCTGTCTGCATCTGTAGGAGACAGAGTCACCATCGCTTGCCGGGCCAGTCAGGGCATTAGCAGTTATAGTAGTTATTTAGCCTGGTATCAGCAAAAACCAGGGAAAGCCCCTAAGCTCCTGATCTATGCTGCATCCACTTTGCAAAGTGGGGTCCCATCAAGGTTCAGCGGCAGTGGATCTGGGACAGAATTCACTCTCACAATCAGCAGCCTGCAGCCTGAAGATTTTGCAACTTATTACTGTCAACAGCTTAATAGTTACCCTCTTTTCACTTTCGGCCCTGGGACCAAAGTGGATATCAAAC	﻿DIQLTQSPSFLSASVGDRVTIACRASQGISSYSSYLAWYQQKPGKAPKLLIYAASTLQSGVPSRFSGSGSGTEFTLTISSLQPEDFATYYCQQLNSYPLFTFGPGTKVDIK		2.86		859.855	>1000
			C936		1.3m		singlet		IGHV3-53	IGHJ4	﻿GAGGTGCAGCTGGTGGAGTCTGGAGGAGGCTTGATCCAGCCTGGGGGGTCCCTGAGACTCTCCTGTGCAGCCTCTGGGTTCACCGTCAGTAGTAACTACATGAGCTGGGTCCGCCAGGCTCCAGGGAAGGGGCTGGAGTGGGTCTCAGTTATTTATAGCGGTGGTAGCACATTCTACGCAGACTCCGTGAAGGGCCGATTCACCATCTCCAGAGACAATTCGAAGAACACGCTGTATCTTCAAATGAACAGCCTGAGAGCCGAGGACACGGCCGTGTATTACTGTGCGAGAGACCTCGGAACGGGGTTATTCGACTACTGGGGCCAGGGAACCCTGGTCACCGTCTCCTCAG	﻿EVQLVESGGGLIQPGGSLRLSCAASGFTVSSNYMSWVRQAPGKGLEWVSVIYSGGSTFYADSVKGRFTISRDNSKNTLYLQMNSLRAEDTAVYYCARDLGTGLFDYWGQGTLVTVSS		IGKV1-9	IGKJ3	﻿GACATCCAGTTGACCCAGTCTCCATCCTTCCTGTCTGCATCTGTAGGAGACAGAGTCACCATCACTTGCCGGGCCAGTCAGGGCATTAGCAGTTATTTAGCCTGGTATCAGCAAAAACCAGGGAAAGCCCCTAAGCTCCTGATCTATGCTGCATCCACTTTGCAAAGTGGGGTCCCATCAAGGTTCAGCGGCAGTGGATCTGGGACAGAATTCACTCTCACAATCAGCAGCCTGCAGCCTGAAGATTTTGCAACTTATTACTGTCAACAGCTTGATAGTTACCCTCCGGGCACTTTCGGCCCTGGGACCAAAGTGGATATCAAAC	﻿DIQLTQSPSFLSASVGDRVTITCRASQGISSYLAWYQQKPGKAPKLLIYAASTLQSGVPSRFSGSGSGTEFTLTISSLQPEDFATYYCQQLDSYPPGTFGPGTKVDIK		1.56		10.13	66.5745
			C937		12m		singlet		IGHV3-53	IGHJ4	﻿GAGGTGCAGCTGGTGGAGTCTGGAGGAGGCTTGATCCAGCCTGGGGGGTCCCTGAGACTCTCCTGTGCAGCCTCTGAGTTAACCGTCAGTAGCAACTACATGAGCTGGGTCCGCCAGGCTCCAGGGAAGGGGCTGGAATGGGTCTCAGTTATTTATCCCGGTGGTAGCACATTCTACGCAGACTCCGTGAAGGGCCGATTCACCATCTCCAGAGACAATTCCAAGAACACGCTGTATCTTCAAATGAACAGCCTGAGAGCCGAGGACACGGCCGTCTATTACTGTGCGAGGGACCTGGGAACGGGGTTATTCGACTACTGGGGCCAGGGAACCCTGGTCACCGTCTCCTCAG	﻿EVQLVESGGGLIQPGGSLRLSCAASELTVSSNYMSWVRQAPGKGLEWVSVIYPGGSTFYADSVKGRFTISRDNSKNTLYLQMNSLRAEDTAVYYCARDLGTGLFDYWGQGTLVTVSS		IGKV1-9	IGKJ3	﻿GACATCCAGTTGACCCAGTCTCCATCCTTCCTGTCTGCATCTGTAGGAGACAGAGTCACCATCACTTGCCGGGCCAGTCAGGGCATTAGCAGTTATTTAGCCTGGTATCAGCAAAAACCAGGGAAAGCCCCTAAGCTCCTGATCTATGCTGCATCCACTTTACAAAGTGGGGTCCCATCAAGGTTCAGCGGCAGTGGATCTGGGACAGAATTCACTCTCACAATCAGCAGCCTGCAGCCTGAAGATTTTGCAACTTATTTCTGTCAACTACTTAATAGTAACCCTCCGGGCACTTTCGGCCCTGGGACCAAAGTGGATATCAAAC	﻿DIQLTQSPSFLSASVGDRVTITCRASQGISSYLAWYQQKPGKAPKLLIYAASTLQSGVPSRFSGSGSGTEFTLTISSLQPEDFATYFCQLLNSNPPGTFGPGTKVDIK		0.97		13.4367	78.1515
			C938		6.2m		singlet		IGHV3-30	IGHJ6	﻿CAGGTGCAGCTGGTGGAGTCTGGGGGAGGCGTGGTCCAGCCTGGGAGGTCCCTGAGACTCTCCTGTGCAGCCTCTGGATTCACCTTCCGTAGCCATGCTATGCACTGGGTCCGCCAGGCTCCAGGCAAGGGGCTGGAGTGGGTGGCAATTATATCATCTGACGGATTCAATAAATACTACGCAGACTCCGTGAAGGGCCGATTCACCATCTCCAGAGACAATTCCAAGAACACGCTGTATGTCCACATGAACAGCCTGAGAGTTGAGGACACGGCTATCTACTACTGTGCGAGCGGATTACTATGGTTCGAGACGAGAGAGATTTCGGGGGCCCCCGACTATGGGATGGCCGTCTGGGGCCAAGGGGCCACGGTCACCGTCTCCTCA	﻿QVQLVESGGGVVQPGRSLRLSCAASGFTFRSHAMHWVRQAPGKGLEWVAIISSDGFNKYYADSVKGRFTISRDNSKNTLYVHMNSLRVEDTAIYYCASGLLWFETREISGAPDYGMAVWGQGATVTVSS		IGKV1-39	IGKJ4	﻿GACATCCAGATGACCCAGTCTCCGTCCTCCCTGTCTGCATCTGTAGGAGACAGAGTCACCATCACTTGCCGGGCAAGTCAGAATATTAGCAACTTTTTAAATTGGTATCAGCAGAAACCAGGGAAAGCCCCTAAGCTCCTGATCTATGCTGCATCCAGTTTGCAGAGTGGGGTCCCATCAAGGTACAGTGGCAGTGGATCTGGGACAGATTTCACTCTCACCATCAGCAGTCTACAAGCTGAAGATTTTGCAACTTACTACTGTCAACAGAGTTACAGTACCCCGCTCACTTTCGGCGGAGGGACCAAGGTGGAAATCAAAC	﻿DIQMTQSPSSLSASVGDRVTITCRASQNISNFLNWYQQKPGKAPKLLIYAASSLQSGVPSRYSGSGSGTDFTLTISSLQAEDFATYYCQQSYSTPLTFGGGTKVEIK		2.63		11.4336	60.4866
			C939		12m		singlet		IGHV3-30	IGHJ6	﻿CAGGTGCAGCTGGTGGAGTCTGGGGGAGGCGTGGTCCAGCCTGGGAGGTCCCTGAGACTCTCCTGTGCAGCCTCTGGTTTCACCTTCAGTAGCTATGCTATGCACTGGGTCCGCCAGGCTCCAGGCAAGGGGCTGGAGTCGGTGGCACTTATATCACATGATGGAAGCAATAAATACCACGCAGACTCCGTGAAGGGCCGATTGACCATCTCCAGGGACACCTCCAAGAACACGCTGTATCTGCAAATGGACAGCCTGAGACCTGAAGACACGGCTGTGTATTACTGTGCGAGCGGATTACTCTGGTTCGAGACGGCAGGGGGTTCGGGGGCCCCCGACTACGGCATGGCCGTCTGGGGCCAAGGGACCACGGTCACCGTCTCCTCA	﻿QVQLVESGGGVVQPGRSLRLSCAASGFTFSSYAMHWVRQAPGKGLESVALISHDGSNKYHADSVKGRLTISRDTSKNTLYLQMDSLRPEDTAVYYCASGLLWFETAGGSGAPDYGMAVWGQGTTVTVSS		IGKV1-39	IGKJ4	﻿GACATCCAGATGACCCAGTCTCCATCCTCCCTGTCTGCATCTGTAGGAGACAGAGTCACCATCACTTGCCGGGCAAGTCAGAGCATTAGCACCTATTTAAATTGGTATCAGCAGAAACCAGGGAGAGCCCCTAAGTTCCTGATCTATGCTGCATCCAGTTTGCAAAGTGGGGTCCCATCAAGGTTCAGTGGCAGTGGATCTGGGACAGACTTCACCCTCATCATCAGCGGTCTGCAACCTGAAGATTTTGCAACTTACTTCTGTCAACAGAGTTACAATACCCCGCTCACTTTCGGCGGAGGGACCAAGGTGGAGATCAAAC	﻿DIQMTQSPSSLSASVGDRVTITCRASQSISTYLNWYQQKPGRAPKFLIYAASSLQSGVPSRFSGSGSGTDFTLIISGLQPEDFATYFCQQSYNTPLTFGGGTKVEIK		3.62		5.85638	24.0806
			C940		12m		singlet		IGHV4-30	IGHJ3	﻿CAGGTGCAGCTGCAGGAGTCCGGCTCAGGACTGGTGAAGCCTTCACAGACCCTGTCCCTCACCTGCGCTGTCTCTGGTGGCTCCGCCAGCAGTGGTGGTTACTCCTGGAGCTGGATCCGGCAGCCACCAGGGAAGGGCCTGGAGTGGATTGGATACATCTATCATAGTGGGAGTACCTACTACAACCCGTCCCTCAAGAGTCGAGTCACCATATCACTAGACAGGACCAAGAAACAGTTCTCCCTGAAGCTGAGCTCTGTGACCGCCGCGGACACGGCCGTGTATTACTGCGCCAGATTTTGCCTGAGTGGGAGCCACTATTTATTTGCTTTTGATATCTGGGGCCCAGGGACAATGGTCACCGTCTCTTCAG	﻿QVQLQESGSGLVKPSQTLSLTCAVSGGSASSGGYSWSWIRQPPGKGLEWIGYIYHSGSTYYNPSLKSRVTISLDRTKKQFSLKLSSVTAADTAVYYCARFCLSGSHYLFAFDIWGPGTMVTVSS		IGLV2-14	IGLJ2	﻿CAGTCTGCCCTGACTCAGCCTGCCTCCGTGTCTGGGTCTCCTGGACAGTCGATCACCATCTCCTGCACTGCAACCAGCAGTGACGTTGGTGGTTATAACTTTGTCTCCTGGTACCAACAATACCCAGGCAAAGTCCCCAAACTCTTGATTTATGATGTCGGTAATCGGCCCTCAGGGGTTTCTAATCGCTTCTCTGGCTCCAAGTCTGGCAACACGGCCTCCCTGACCATCTCTGGGCTCCAGGCTGAGGACGAGGCTGATTATTACTGCAGTTCATATACAAACAGCAGCACGTTTTTCGGCGGAGGGACCAAGCTGACCGTCCTAG	﻿QSALTQPASVSGSPGQSITISCTATSSDVGGYNFVSWYQQYPGKVPKLLIYDVGNRPSGVSNRFSGSKSGNTASLTISGLQAEDEADYYCSSYTNSSTFFGGGTKLTVL		1.795		9.33191	101.435
			C941		12m		singlet		IGHV1-69	IGHJ4	﻿CAGGTGCAGCTGGTGCAGTCTGGGGCTGAGGTGAAGAAGCCTGGGTCCTCGGTGAAAGTCTCCTGCAAGGCTTCTGGAGGCACCTCCCGCAGCTATCCTATCAGCTGGGTGCGACAGGCCCCTGGACAAGGGCTTGAGTGGATGGGAAGGATCATCCCTATCGTTGGGACAGCAAACTACGCACAGAGGTTCCAGGGCAGAGTCACGATCACCGCGGACGAATCCACGGGCACAGCCTACATGGAGCTGAGCAGCCTGAGATCTGAGGACACGGCCGTGTATTACTGTGCGAGAAATCGCGGATATAGTGACTACGGGTCGGTTTACTACTTTGACTACTGGGGCCAGGGAACCCTGGTCACCGTCTCCTCAG	﻿QVQLVQSGAEVKKPGSSVKVSCKASGGTSRSYPISWVRQAPGQGLEWMGRIIPIVGTANYAQRFQGRVTITADESTGTAYMELSSLRSEDTAVYYCARNRGYSDYGSVYYFDYWGQGTLVTVSS		IGLV1-40	IGLJ3	﻿CAGTCTGTGCTGACTCAGCCGCCCTCAGTGTCTGGGGCCCCAGGGCAGAGGGTCACCATCTCCTGCACTGGGAGCAGCTCCAACATCGGGGCAGGTTATGATGTACACTGGTACCAGCAGCTTCCAGGAGCGGCCCCCAAACTCCTCATCTATCGTAACATCAATCGGCCCTCAGGGGTCCCTGACCGATTCTCTGGCTCCAAGTCTGGCACCTCAGCCTCCCTGGCCATCACTGGGCTCCAGGCTGACGATGAGGCTGATTATTACTGCCAGTCGTATGACAGCAGCCTGAGTGGTTCGGTGTTCGGCGGAGGGACCAAGCTGACCGTCCT	﻿QSVLTQPPSVSGAPGQRVTISCTGSSSNIGAGYDVHWYQQLPGAAPKLLIYRNINRPSGVPDRFSGSKSGTSASLAITGLQADDEADYYCQSYDSSLSGSVFGGGTKLTV		0.88		148.617	>1000
			C942		12m		singlet		IGHV3-30	IGHJ4	﻿CAGGTGCAGCTGGTGGAGTCTGGGGGAGGCGTGGTCCAGCCTGGGAGGTCCCTGAGACTCTCCTGTGCAGCCTCTGGATTCACCTTCAGTAGTTATGTTATGCACTGGGTCCGCCAGGCTCCAGGCAAGGGGCTGGAGTGGGTGGCAATTATCTCATCTGATGGAAACACTAAATACTACGCAGACTCCGTGAAGGGCCGATTCACCATCTCCAGAGACAATTCCAAGAACACGTTGTATTTGCAGATGAACAGCGTGAGAACTGACGACACGGCTGTATATTACTGTGCGAGAGATGGGACCACGATGACTCCCACGGACCTCCTGACTGACTGGGGCCAGGGAACTCTGGTCACCGTCTCCTCAG	﻿QVQLVESGGGVVQPGRSLRLSCAASGFTFSSYVMHWVRQAPGKGLEWVAIISSDGNTKYYADSVKGRFTISRDNSKNTLYLQMNSVRTDDTAVYYCARDGTTMTPTDLLTDWGQGTLVTVSS		IGKV1-39	IGKJ3	﻿GACATCCAGATGACCCAGTCTCCATCCTCCCTGTCTGCATCTGTAGGAGACAGAGTCAGCATCACTTGCCGGGCAAGTCAGAGAATTAGCAGCTATTTAAATTGGTATCAGCAGAAACCAGGGAAAGCCCCTAAGCTCCTCATCTATGCTGCATCCAGTTTGCAAAGTGGGGTCCCATCAAGGTTCAGTGGCAGTGGATCTGGGACAGATTTCACTCTCACCATCAGCAGTCTGCAACCTGAAGATTTTGCAACTTACTACTGTCAACAGAGTTACAGTACCCCCCCCCTCACTTTCGGCCCTGGGACCAAAGTGGATATCAAAC	﻿DIQMTQSPSSLSASVGDRVSITCRASQRISSYLNWYQQKPGKAPKLLIYAASSLQSGVPSRFSGSGSGTDFTLTISSLQPEDFATYYCQQSYSTPPLTFGPGTKVDIK		1.35		>1000	>1000
			C943		12m		singlet		IGHV3-30	IGHJ4	﻿CAGGTGCAGCTGGTGGAGTCTGGGGGAGGCGTGGTCCAGCCTGGGAGGTCCCTGAGACTCTCCTGTGCAGCCTCTGGATTCCCCTTCAGTAGCTTTGGCATGCACTGGGTCCGCCAGGCTCCAGGCAGGGGGCTGGAGTGGGTGGCACTTATATTATATGATGGAGATAATAAATACTATGCAGACTCCGTGAAGGGCCGATTCACCATCTCCAGAGACAATTCCAAGAACACGCTGTATCTGCAAATGAACAGCCTGAGAGCTGAGGACACGGCTGTGTATTACTGTGCGAAAGATATAGGCGGGGGCAGCTCGCCCCCATTTTTTGACTACTGGGGCCAGGGAACCCTGGTCACCGTCTCCTCAG	﻿QVQLVESGGGVVQPGRSLRLSCAASGFPFSSFGMHWVRQAPGRGLEWVALILYDGDNKYYADSVKGRFTISRDNSKNTLYLQMNSLRAEDTAVYYCAKDIGGGSSPPFFDYWGQGTLVTVSS		IGLV3-21	IGLJ3	﻿TCCTATGAGCTGACTCAGGCACCCTCAGTGTCACTGGCCCCAGGAAAGACGGCCAGGATTACCTGTGGGGAAAACAACATTGGAAGTAAAAGTGTGCACTGGTACCAGCAGAAGCCAGGCCAGGCCCCTGTGCTGGTCATCTATTATGATAGTGACCGGCCCTCAGGGATCCCTGAGCGATTCTCTGGCTCCAACTCTGGGAACACGGCCACCCTGACCATCAGCAGGGTCGAGGCCGGGGATGAGGCCGACTATTACTGTCAGGTGTGGGATAGTAGTAGTGATCATGTGATGTTCGGCGGAGGGACCAAGCTGACCGTCCTAG	﻿SYELTQAPSVSLAPGKTARITCGENNIGSKSVHWYQQKPGQAPVLVIYYDSDRPSGIPERFSGSNSGNTATLTISRVEAGDEADYYCQVWDSSSDHVMFGGGTKLTVL		2.59		87.035	>1000
			C944		12m		singlet		IGHV3-30	IGHJ6	﻿CAGGTGCAGCTGGTGGAGTCTGGGGGAGGCGTGGTCCAGCCTGGGAGGTCCCTGAGACTCTCCTGTGCAGCCTCTGGATTCACCTTCAGTAGCTATGGCATGCACTGGGTCCGCCAGGCTCCAGGCAAGGGGCTGGAGTGGGTGGCAGTTATATCATATGATGGAAGTTATAAATACTATGCAGACTCCGTGAAGGGCCGATTCACCATCTCCAGAGACAATTCCAAGAACACGCTGTATCTGCAAATGAACAGCCTGAGAGCTGAGGACACGGCTGTGTATTACTGTGCGAAAGGTAGTGGGAGCCAGCTCTACTACTACTACGGTATGGACGTCTGGGGCCAAGGGACCACGGTCACCGTCTCCTCA	﻿QVQLVESGGGVVQPGRSLRLSCAASGFTFSSYGMHWVRQAPGKGLEWVAVISYDGSYKYYADSVKGRFTISRDNSKNTLYLQMNSLRAEDTAVYYCAKGSGSQLYYYYGMDVWGQGTTVTVSS		IGKV1-39	IGKJ3	﻿GACATCCAGATGACCCAGTCTCCATCCTCCCTGTCTGCATCTGTAGGAGACAGAGTCACCATCACTTGCCGGGCAAGTCAGAGCATTAGCAGCTATTTAAATTGGTATCAGCAGAAACCAGGGAAAGCCCCTAAGCTCCTGATCTATGCTGCATCCAGTTTGCAAAGTGGGGTCCCATCAAGGTTCAGTGGCAGTGGATCTGGGACAGATTTCACTCTCACCATCAGCAGTCTGCAACCTGAAGATTTTGCAACTTACTACTGTCAACAGAGTTACAGTACCCCCCATTCGAGTTTCGGCCCTGGGACCAAAGTGGATATCAAAC	﻿DIQMTQSPSSLSASVGDRVTITCRASQSISSYLNWYQQKPGKAPKLLIYAASSLQSGVPSRFSGSGSGTDFTLTISSLQPEDFATYYCQQSYSTPHSSFGPGTKVDIK		1.71		>1000	>1000
			C945		12m		singlet		IGHV1-46	IGHJ6	﻿CAGGTGCAGCTGGTGCAGTCTGGGGCTGAGGTGAAGAAGCCTGGGGCCTCAGTGAGGATTTCTTGCAAGGCATCTGGATACACCTTCACCAACTACTATATGCACTGGGTGCGACAGGCCCCTGGACAAGGGCTTGAGTGGATGGGAATTATCAACCCTAGTGGTGGTAGCACAACCTACGCACCGAAGTTCCAGGCCAGAGTCACCATGACCCGGGACACGTCCACGAGCACAGTCTACATGGAGCTGAGCAGCCTGAGATCTGACGACACGGCCGTGTATTACTGTGCGAGAGATTACGTACTAGTACCAGCTCGCAGCGGTATGGACGTCTGGGGCCAAGGGACCACGGTCACCGTCTCCTC	﻿QVQLVQSGAEVKKPGASVRISCKASGYTFTNYYMHWVRQAPGQGLEWMGIINPSGGSTTYAPKFQARVTMTRDTSTSTVYMELSSLRSDDTAVYYCARDYVLVPARSGMDVWGQGTTVTVS		IGKV3-11	IGKJ2	﻿GAAATTGTGTTGACACAGTCTCCAGCCACCCTGTCTTTGTCTCCAGGGGAAAGAGCCACCCTCTCCTGCAGGGCCAGTCAGAGTGTTAGCAGCTACTTAGCCTGGTACCAACAGAAACCTGGCCAGGCTCCCAGGCTCCTCATCTATGATGCATCCAACAGGGCCACTGGCATCCCAGCCAGGTTCAGTGGCAGTGGGTCTGGGACAGACTTCACTCTCACCATCAGCAGCCTTGAGCCTGAAGATTTTGCAATTTATTACTGTCAGCAGCGTAGCAACTGGCCGTACACTTTTGGCCAGGGGACCAAGCTGGAGATCAAAC	﻿EIVLTQSPATLSLSPGERATLSCRASQSVSSYLAWYQQKPGQAPRLLIYDASNRATGIPARFSGSGSGTDFTLTISSLEPEDFAIYYCQQRSNWPYTFGQGTKLEIK		3.13		>1000	>1000
			C946		12m		singlet		IGHV1-46	IGHJ6	﻿CAGGTGCAGCTGGTGCAGTCTGGGGCTGAGGTGAAGAAGCCTGGGGCCTCAGTGAAGGTTTCCTGCAAGGCATCTGGATACACCTTCACCAACTACTATATTCACTGGGTGCGACAGGCCCCTGGACAAGGGCTTGAGTGGATGGGGATAATCAACCCTGATGGTGATAGCACAAGCTACGTACAGAAGTTCCAGGGCAGAGTCACCATGACCAGGGACACGTCCACGAGCACAGTCTACATGGAGCTGAGCAGCCTGAGATCTGAGGACACGGCCGTGTATTACTGTGCGAGAGATTTGGTATTTGTACCAGCTACTAGTGCAATGGACGTCTGGGGCAAAGGGACCACGGTCACCGTCTCCTCAG	﻿QVQLVQSGAEVKKPGASVKVSCKASGYTFTNYYIHWVRQAPGQGLEWMGIINPDGDSTSYVQKFQGRVTMTRDTSTSTVYMELSSLRSEDTAVYYCARDLVFVPATSAMDVWGKGTTVTVSS		IGKV3-11	IGKJ3	﻿GAAATTGTGTTGACACAGTCTCCAGCCACCCTGTCTTTGTCTCCAGGGGAAAGAGCCACCCTCTCCTGCAGGGCCAGTCAGAGTGTTAGCAGCTACTTAGCCTGGTACCAACAGAAACCTGGCCAGGCTCCCAGGCTCCTCATCTATGATGCATCCAACAGGGCCACTGGCATCCCAGCCAGGTTCAGTGGCAGTGGGTCTGGGACAGACTTCACTCTCACCATCAGCAGCCTGGAGCCTGAAGATTTTGCAGTTTATTACTGTCAGCAGCGTAGCAACTGGCTATTCACTTTCGGCCCTGGGACCAAAGTGGATATCAAAC	﻿EIVLTQSPATLSLSPGERATLSCRASQSVSSYLAWYQQKPGQAPRLLIYDASNRATGIPARFSGSGSGTDFTLTISSLEPEDFAVYYCQQRSNWLFTFGPGTKVDIK		3.816		>1000	>1000
			C947		12m		singlet		IGHV4-4	IGHJ3	﻿CAGGTGCAGCTGCAGGAGTCGGGCCCAGGACTGGTGAGGCCCTCGGGGACCCTGTCCCTCACCTGCGCTGTCACTGGTGGCTCCATTAGTAGTAGTGACTGCTGGAGTTGGGTCCGCCAGCCCCCAGGGAAGGGGCTGGAGTGGATTGGGGAGATCTGTCATGGTAGGACTTCTAACTACAACCCGTCACTCAAGAGTCCAGTCAGCATATCAGTAGACAAGTCCAAGAACCAGTTCTCCCTGATTCTGAGCTCTGTGACCGCCGCGGACAAGGCCGTCTATTACTGTGCGAGAAGTTCACGATTTTTGCCCCCCCTGCCTGATGCTTTTGATCTCTGGGGCCAAGGGACAATGGTCACCGTCTCTTCAG	﻿QVQLQESGPGLVRPSGTLSLTCAVTGGSISSSDCWSWVRQPPGKGLEWIGEICHGRTSNYNPSLKSPVSISVDKSKNQFSLILSSVTAADKAVYYCARSSRFLPPLPDAFDLWGQGTMVTVSS		IGLV1-40	IGLJ3	﻿CAGTCTGTGCTGACTCAGCCGCCCTCAGTGTCTGGGGCCCCAGGGCAGAGGGTCACCATCTCCTGCACTGGGAGCAGCTCCAACATCGGGGCAGGTTATGATGTCCACTGGTACAAGCAGCTTCCGGGAACAGCCCCCAAACTCCTCATATATGGTAACACCAATCGGCCCTCAGGGGTCCCTGGCCGATTCTCTGGCTCCAAGTCTGGCACCTCAGCCTCCCTGGCCATCACTGGGCTCCAGGCTGAGGATGAGGCTGATTATTTCTGCCAGTCGTATGACACCAGGCTGAGTGTGGTGTTCGGCGGAGGGACCAAGCTGACC	﻿QSVLTQPPSVSGAPGQRVTISCTGSSSNIGAGYDVHWYKQLPGTAPKLLIYGNTNRPSGVPGRFSGSKSGTSASLAITGLQAEDEADYFCQSYDTRLSVVFGGGTKLT		2.076		3.88398	22.0522
			C948		12m		singlet		IGHV3-13	IGHJ5	﻿GAGGTGCAGCTGGTGGAGTCTGGGGGAGGCTTGGTACAGCCTGGGGGGTCCCTGAGACTCTCCTGTGCAGCCTCTGGATTCACCTTCAGTAGATACGACATGCACTGGGTCCGCCAAGCTACAGGAAAAGGTCTGGAATGGGTCTCAATTATTGGTACTGCTGGTGACACATACTATCCAGGCTCCGTGAAGGGCCGATTCACCATCTCCAGAGACAATGCCAAGAACTCCTTGTTTCTTCAAATGAACAGCCTGAGAGCCGGGGACACGGCTGTGTATTACTGTGCAAGAGCCAACTATGATAGTAGTGGTTACCACAACTGGTTCGACCCCTGGGGCCAGGGAACCCTGGTCACCGTCTCCTCAG	﻿EVQLVESGGGLVQPGGSLRLSCAASGFTFSRYDMHWVRQATGKGLEWVSIIGTAGDTYYPGSVKGRFTISRDNAKNSLFLQMNSLRAGDTAVYYCARANYDSSGYHNWFDPWGQGTLVTVSS		IGKV1-39	IGKJ1	﻿GACATCCAGATGACCCAGTCTCCATCCTCCCTGTCTGCATCTATAGGAGACAGAGTCACCATCACTTGCCGGGCAAGTCAGAACATTAACAGCTATTTAAATTGGTATCAGCAGAAACCAGGGAAAGCCCCTAAGCTCCTGATCTATGCTGCATCCAGTTTGCAAAGTGGGGTCCCATCAAGGTTCAGTGGCAGTGGATCTGGGACAGATTTCACTCTCACCATCAACAGTCTGCAACCTGAAGATTTTGCAACTTACTACTGTCAACAGAGTTACAGTATGCCCTCGTGGACGTTCGGCCAAGGGACCAAGGTGGAAATCA	﻿DIQMTQSPSSLSASIGDRVTITCRASQNINSYLNWYQQKPGKAPKLLIYAASSLQSGVPSRFSGSGSGTDFTLTINSLQPEDFATYYCQQSYSMPSWTFGQGTKVEI		3.26		>1000	>1000
			C949		12m		singlet		IGHV4-30	IGHJ4	﻿CAGGTGCAGCTGCAGGAGTCGGGCCCAGGACTGGTGAAGCCTTTACAGACCCTGTCCCTCACGTGCACTGTCTCTGGTGGCTCCATCAGCAATGGTGATTACTACTGGAGTTGGATCCGCCAGTCCCCAGGGAAGGGCCTGGAGTGGATTGGGAACATCTTTTACAGTGGGGCCACCTACTTCAACCCGTCCCTCAAGAGTCGAGTAACCCTATCAGTGGACACGTCCAAGAACCAGTTCTCCCTGAAGCTGAGCTCTGTGACTGCCGCAGACACGGCCGTCTATTACTGTGCCAGAGTCGTCAGGGTACTCCCGGCTGCATCGGTCGACTGCTGGGGCCAGGGAACCCTGGTCACCGTCTCCTCAG	﻿QVQLQESGPGLVKPLQTLSLTCTVSGGSISNGDYYWSWIRQSPGKGLEWIGNIFYSGATYFNPSLKSRVTLSVDTSKNQFSLKLSSVTAADTAVYYCARVVRVLPAASVDCWGQGTLVTVSS		IGLV2-11	IGLJ3	﻿CAGTCTGCCCTGACTCAGCCTCGCTCAGTGTCCGGGTCTCCTGGACAGTCAGTCCCCATCTCCTGCACTGGAACCAGCAGTGATGTTGGTGGTTATGACTATGTCTCCTGGTACCAACAGCACCCAGGCAAAGCCCCCAAACTCATCATTTATGATGTCAGTGAGCGGCCCTCAGGGGTCCCTGATCGCTTCTCTGGCTCCAAGTCTGGCAACACGGCCTCCCTGACCATCTCTGGGCTCCAGGCTGAGGATGAGGCTACTTATTACTGCTGCTCATATGCAGGCACCTCTGTGATGTTCGGCGGAGGGACCAAGCTGACCGTCCTAG	﻿QSALTQPRSVSGSPGQSVPISCTGTSSDVGGYDYVSWYQQHPGKAPKLIIYDVSERPSGVPDRFSGSKSGNTASLTISGLQAEDEATYYCCSYAGTSVMFGGGTKLTVL		2.33		>1000	>1000
			C951		12m		clone		IGHV4-4	IGHJ3	﻿CAGGTGCAGCTGCAGGAGTCGGGCCCACGACTGGTGAAGCCTTCGGGGACCCTGTCCCTCACCTGCGCTGTCTCTGGTGGCTCCATCAGCACTACTAACTGGTGGAGTTGGGTCCGCCAGCCCCCAGGAAAGGGGCTGGAGTGGATTGGGGAAATCCATCATAGTGGGAACACCAACTACAACCCGTCCCTCAAGAGTCGAGTCACCATATCAGTGGACAGGTCCAAGAACCAGTTCTCCCTGAAGCTGAGCTCTGTGACCGCCGCGGACACGGCCGTCTATTTCTGTGCGAGAGATGGAGGACGACCCGGGGATCCTTTTGATATCTGGGGCCAAGGGACAATGGTCACCGTCTCTTCAG	﻿QVQLQESGPRLVKPSGTLSLTCAVSGGSISTTNWWSWVRQPPGKGLEWIGEIHHSGNTNYNPSLKSRVTISVDRSKNQFSLKLSSVTAADTAVYFCARDGGRPGDPFDIWGQGTMVTVSS		IGLV2-14	IGLJ1	﻿CAGTCTGCCCTGACTCAGCCTGCCTCCGTGTCTGGGTCTCCTGGACAGTCGATCACCATCTCCTGCACTGGAACCAGCAGTGACGTTGGTGGTTATAACTATGTCTCCTGGTACCAACAACACCCAGGCAAAGCCCCCAACCTCATGATTTATGATGTCAGTGATCGGCCCTCAGGGGTTTCTAATCGCTTCTCTGGCTCCAAGTCTGGCAACACGGCCTCCCTGACCATCTCTGGGCTCCAGGCTGAGGACGAGGCTGATTATTACTGCAACTCATTTACAAGCAACAGCACTCGAGTCTTCGGAACTGGGACCAAGGTCACCGTCCT	﻿QSALTQPASVSGSPGQSITISCTGTSSDVGGYNYVSWYQQHPGKAPNLMIYDVSDRPSGVSNRFSGSKSGNTASLTISGLQAEDEADYYCNSFTSNSTRVFGTGTKVTV		0.81		7.77354	47.7843
	COV96		C1025		12m		singlet		IGHV3-9	IGHJ4	﻿GAAGTGCAGCTGGTGGAGTCTGGGGGAGGCTTGGTACAGCCTGGCAGGTCCCTGAGACTCTCCTGTGCAGCCTCTGGATTCACCTTTGATGATTATGCCATGCACTGGGTCCGGCAAGTTCCAGGGAAGGGCCTGGAGTGGGTCTCAGGTGTTAGTTGGAATGGTGATAGCGTAGGCTATGCGGACTCTATGGAGGGCCGATTCACCATCTCCAGAGACAACGCCAAGAACTCCCTGTATCTGCAGATGAACAGTCTGAGAACTGAAGACACGGCCTTGTATTACTGTGCAAAAGGGGTCGACTATAGCAGTTCGAGCAACTTTGACTTCTGGGGCCAGGGAACCCTGGTCACCGTCTCCTCAG	﻿EVQLVESGGGLVQPGRSLRLSCAASGFTFDDYAMHWVRQVPGKGLEWVSGVSWNGDSVGYADSMEGRFTISRDNAKNSLYLQMNSLRTEDTALYYCAKGVDYSSSSNFDFWGQGTLVTVSS		IGKV1D-12	IGKJ4	﻿GACATCCAGATGACCCAGTCTCCATCTTCTGTGTCTGCATCTGTAGGAGACAGAGTCACCATCACTTGTCGGGCGAGTCAGGGTATTAGCAGCTGGTTAGCCTGGTATCAGCAGAAACCAGGGAAAGCCCCTAAGCTCCTGATCTCTCTTGCATCCAGTTTGCAAAGTGGGGTCCCATCAAGGTTCAGCGGCAGTGGATCTGAGACAGATTTCACTCTCATTATCAGCAGCCTGCAGCCTGAAGATTTTGCAACTTACTATTGTCAACAGTCTAGCAGTTTCCCTCTCACTTTCGGCGGAGGGACCAAGGTGGAAATCAAAC	﻿DIQMTQSPSSVSASVGDRVTITCRASQGISSWLAWYQQKPGKAPKLLISLASSLQSGVPSRFSGSGSETDFTLIISSLQPEDFATYYCQQSSSFPLTFGGGTKVEIK		2.51		715.399	>1000
			C1026		12m		clone		IGHV3-30	IGHJ4	﻿CAGGTGCAGCTGGTGGAGTCTGGGGGAGGCGTGGTCCAGCCTGGGAAGTCCCTGAGACTCTCCTGTGCAGCGTCTGGATTCATCTTCAGTAGCTATAGTATGCATTGGGTCCGCCAGGCTCCAGGCAAGGGGCTAGAGTGGGTGGCAGTTGTATCAAATGATGGAAGTGGTAAATTCTACGCAGACTCCGTGAGGGGCCGATTCACCATTTTCAGAGACAATTCCAAGAACACACTATATCTGCAAGTGAGCAGCCTGAGAGCTGAGGACACGGCTGTCTACTACTGTGCGAGAGATGCGCTGACATCTATATCGGTTCTTTTTGACTGCTGGGGCCAGGGAACCCTGGTCACCGTCTCCTCAG	﻿QVQLVESGGGVVQPGKSLRLSCAASGFIFSSYSMHWVRQAPGKGLEWVAVVSNDGSGKFYADSVRGRFTIFRDNSKNTLYLQVSSLRAEDTAVYYCARDALTSISVLFDCWGQGTLVTVSS		IGKV1-39	IGKJ4	﻿GACATCCAGATGACCCAGTCTCCATCGTCCCTGTCTGCATCTCTAGGAGACAGAGTCACCATCACTTGCCGGGCAAGTCAGAGCATTAGCAACTATTTAAATTGGTATCAGCAAAAACCAGGGAAAGCCCCTAAGCTCCTGATCTATGGTGCATCCAGTTTGCAAAGTGGGGTCCCATCAAGGTTCAGTGGCAGTGGATCTGGGACAGATTTCACTCTCACCATCAGCAATCTGCAACCTGAAGATTTTGCAACTTACTTCTGTCAACAGAGTTACAGTACCCCTTCGGTCACTTTCGGCGGAGGGACCAAGGTGGAGATCAAAC	﻿DIQMTQSPSSLSASLGDRVTITCRASQSISNYLNWYQQKPGKAPKLLIYGASSLQSGVPSRFSGSGSGTDFTLTISNLQPEDFATYFCQQSYSTPSVTFGGGTKVEIK		2.5		573.333	>1000
			C1027		12m		singlet		IGHV3-66	IGHJ5	﻿GAGGTGCAGCTGGTGGAGTCTGGGGGAGGCTTGGTCCAGCCTGGGGGGTCCTTGAGACTCTCCTGTGCAGCCTCTGGATTCATCGTCACCACTAATTACATGAGCTGGGTCCGCCAGGCTCCAGGGAAGGGGCTGGAGTGGGTCTCACTTATTTATCCCGGTGGTAGCACATTCTACGCAGACTCCGTAGAGGGCCGATTCACCATCTCCAGAGACAACTCCAAGAACACCTTGTATCTTCAAGTGAACAGCCTGAGAGTTGAGGACACGGCTGTCTATTACTGTGCGAGAGATACCTTCGGTAGGGGGGACGACCACTGGGGCCAGGGAACCCTGGTCACCGTCTCCTCAG	﻿EVQLVESGGGLVQPGGSLRLSCAASGFIVTTNYMSWVRQAPGKGLEWVSLIYPGGSTFYADSVEGRFTISRDNSKNTLYLQVNSLRVEDTAVYYCARDTFGRGDDHWGQGTLVTVSS		IGKV1-33	IGKJ2	﻿GACATCCAGATGACCCAGTCTCCATCCTCCCTGTCTGCATCTGTGGGGGACAGAGTCACCATCACTTGCCAGGCGAGTCAGGACATTAACATTTATTTAAATTGGTATCAGCAGAGACCGGGGAAAGCCCCTAAGCTCCTGATCTACGATGCATCCAATTTACAAACGGGGGTCCCATCAAGGTTCAGTGGAAGTGGATCTGGGACAGACTTTACTATCACCATTAGCAGCCTGCAGCCTGAAGATATTGCAACATATTACTGTCAACAATATGATAATCTCCCTCGGAGTTTTGGCCAGGGGACCAAGCTGGAGATC	﻿DIQMTQSPSSLSASVGDRVTITCQASQDINIYLNWYQQRPGKAPKLLIYDASNLQTGVPSRFSGSGSGTDFTITISSLQPEDIATYYCQQYDNLPRSFGQGTKLEI		2.42		14.7142	66.7593
			C1028		12m		singlet		IGHV3-30	IGHJ6	﻿CAGGTGCAGCTGGTGGAGTCTGGGGGAGGCGTGGTCCAGCCTGGGAGGTCCCTGAGACTCTCCTGTGCAGACTCTGGATTCACCTTCAGTAGCTCTGGCATGCACTGGGTCCGCCAGGCACCAGGCAAGGGGCTGGAGTGGGTGGGAGTTATATCATATGATGGTGGTAATAAATACTATGCAGACTCCGTGAAGGGCCGATTCACCATCTCCAGAGACAATTCCAAGAACACGCTGTATCTGCAAATGAACAGCCTGAGAGCAGAGGACACGGCTGTGTATTACTGTGCGAAAGATACCCCCGGAGGGGACGATATTATGACTGGCTGGGGGTTATACGGTATGGACGTCTGGGGCCAAGGGACCACGGTCACCGTCTCCTCA	﻿QVQLVESGGGVVQPGRSLRLSCADSGFTFSSSGMHWVRQAPGKGLEWVGVISYDGGNKYYADSVKGRFTISRDNSKNTLYLQMNSLRAEDTAVYYCAKDTPGGDDIMTGWGLYGMDVWGQGTTVTVSS		IGKV1-39	IGKJ1	﻿GACATCCAGATGACCCAGTCTCCATCCTCCCTGTCTGCATCTGTAGAAGACAGAGTCACCATCACTTGCCGGGCAAGTCAGAGCATTAGCAGCTATTTAAATTGGTATCAGCAGAAGCCAGGGAAAGCCCCTAAACTCCTGATCTATGCTGCAATCAGTTTGCAGAGTGGGGTCCCATCAAGGTTCAGTGGCAGTGGATCTGGGACAGAGTTCACTCTCACCATCAGCAGTCTGCAACCTGAAGATTTTGCAACTTACTACTGTCAACAGAGTTACACTACCCCCTGGGCGTTCGGCCAAGGGACCAAGGTGGAAATCAAAC	﻿DIQMTQSPSSLSASVEDRVTITCRASQSISSYLNWYQQKPGKAPKLLIYAAISLQSGVPSRFSGSGSGTEFTLTISSLQPEDFATYYCQQSYTTPWAFGQGTKVEIK		3.58		110.953	>1000
			C1029		12m		clone		IGHV3-33	IGHJ4	﻿CAGGTGCAGCTGGTGGAGTCTGGGGGAGGCGTGGTCCAGCCTGGGAGGTCCCTGAGACTCTCCTGTGCAGCGTCTGGATTCACCTTCAGTAGTTTTGGCATGCACTGGGTCCGCCAGGCTCCAGGCAAGGGGCTGGAGTGGGTGGCAGTTATATCGTATGATGGAAGTTATAAAGACTATGGAGACTCCGTGAAGGGCCGATTCACCATCTCCAGAGACAATTCCAAGAACACGCTGTATCTGCAAATGAACAGCCTGAGAGCCGAGGACACGGCTGTGTATTACTGTGCGAGAGACAGCAACGTGGATACAGTTATGGTGACGTGGTTTGACTACTGGGGCCGGGGAACCCTGGTCACCGTCTCCTCAG	﻿QVQLVESGGGVVQPGRSLRLSCAASGFTFSSFGMHWVRQAPGKGLEWVAVISYDGSYKDYGDSVKGRFTISRDNSKNTLYLQMNSLRAEDTAVYYCARDSNVDTVMVTWFDYWGRGTLVTVSS		IGKV1-39	IGKJ1	﻿GACATCCAGATGACCCAGTCTCCACCCTCCCTGTCTGCAGCTGTAGGAGACAGAGTCACCATCACTTGCCGGGCAAGTCAGAGCATTAGCAGCTATTTAAATTGGTATCAGCAGAAACCAGGGAAAGCCCCTAAGCTCCTGATCTATGCTGCATCCAGTTTGCAAAGTGGGGTCCCATCAAGGTTCAGTGGCAGTGGATCTGGGACAGATTTCACTCTCACCATCAGCAGTCTGCAACCTGAAGATTTTGCAACTTACTACTGTCAACAGAGTTACAGTACCCCTCCCTGGACGTTCGGCCAAGGGACCAAGGTGGAAATCAAAC	﻿DIQMTQSPPSLSAAVGDRVTITCRASQSISSYLNWYQQKPGKAPKLLIYAASSLQSGVPSRFSGSGSGTDFTLTISSLQPEDFATYYCQQSYSTPPWTFGQGTKVEIK		2.86		839.141	>1000
			C1030		12m		clone		IGHV3-66	IGHJ6	﻿GAGGTGCAGCTGGTGGAGTCTGGGGGAGGCTTGGTCCAGCCTGGGGGGTCCCTGAGACTCTCCTGTGAAGCCTCTGGAGTCATCGTCAGTAGCAACTACATGAACTGGGTCCGCCAGGCTCCAGGGAAGGGGCCGGAGTGGGTCTCAGTTCTCTATGCCGGTGGTAGCACATTCTACGCAGACTCCGTGAAGGGCCGATTCACCATCTCCAGAGACGATTCCAAGAACACACTGTTTCTTCAAATGAACAACCTGAGAGCTGAGGACACGGCTGTCTATTTCTGTGCGAGAGATTTGATTGCATTCGGAATGGATGTCTGGGGCCAAGGGACCACGGTCACCGTCTCCTCA	﻿EVQLVESGGGLVQPGGSLRLSCEASGVIVSSNYMNWVRQAPGKGPEWVSVLYAGGSTFYADSVKGRFTISRDDSKNTLFLQMNNLRAEDTAVYFCARDLIAFGMDVWGQGTTVTVSS		IGKV1-9	IGKJ4	﻿GACATCCAGTTGACCCAGTCTCCATCCTTCCTGTCTGCATCTGTAGGAGACAGAGTCACCATCACTTGCCGGGCCAGTCAGGGCATTAACAGTGATTTAGCCTGGTATCAGCAAAAACCAGGGAAAGCCCCTAAGCTCCTGATCTATGGTGCATCCACTTTGCAAAGTGGGGTCCCATCAAGGTTCAGCGGCAGTGGATCTGGGACAGAGTTCAGTCTCACGGTCAGCAGCCTGCAGCCTGAAGATTTTGCAACTTATTACTGTCAACAACTTAATAGTTACCGAAGGTTCGGCGGCGGGACCAAGGTGGAGATCAAAC	﻿DIQLTQSPSFLSASVGDRVTITCRASQGINSDLAWYQQKPGKAPKLLIYGASTLQSGVPSRFSGSGSGTEFSLTVSSLQPEDFATYYCQQLNSYRRFGGGTKVEIK		2.78		12.377	103.084
			C1031		12m		singlet		IGHV4-39	IGHJ4	﻿CAGCTGCAGCTGCAGGAGTCGGGCCCAGGACTGGTGAAGCCTTCGGAGACCCTGTCCCTCACCTGCACTGTCTCTGGTGGCTCCATCAATACTAGTACTTACTACTGGGGCTGGATCCGCCAGCCCCCAGGGAAGGGGCTGGAGTGGATTGGGAATATCTATTATAGTGGGATCACCTACTACAACCCGTCCCTCAAGAGTCGAGTCACCATATCCGTAGACACGTCCAAGAACCAGTTCTCCCTGAAGCTGAGGTCTGTGACCGCCGCAGACACGGCTGTGTATTACTGTGCGAGACAACATCGTTTTGGTTCGGGGAGTTCTGAGCTTCTGTGGGGCCAGGGAACCCTGGTCACCGTCTCCTCAG	﻿QLQLQESGPGLVKPSETLSLTCTVSGGSINTSTYYWGWIRQPPGKGLEWIGNIYYSGITYYNPSLKSRVTISVDTSKNQFSLKLRSVTAADTAVYYCARQHRFGSGSSELLWGQGTLVTVSS		IGLV2-8	IGLJ2	﻿CAGTCTGCCCTGACTCAGCCTCCCTCCGCGTCCGGGTCTCCTGGACAGTCAGTCACCATCTCCTGCACTGGAACCAGCAGTGACGTTGGTAGTTATAACTATGTCTCCTGGTACCAACAGCACCCAGGCAAAGCCCCCAAACTCATGATTTATGAGGTCACTAAGCGGCCCTCAGGGGTCCCTGATCGCTTCTCTGGCTCCAAGTCTGGCAACACGGCCTCCCTGACCGTCTCTGGGCTCCAGGCTGACGATGAGGCTGATTATTACTGCAGTTCATATGCAGGCAGCAGCAATTTGGTATTCGGCGGAGGGACCAAGCTGACCGTCCT	﻿QSALTQPPSASGSPGQSVTISCTGTSSDVGSYNYVSWYQQHPGKAPKLMIYEVTKRPSGVPDRFSGSKSGNTASLTVSGLQADDEADYYCSSYAGSSNLVFGGGTKLTV		7.23		>1000	>1000
			C1032		12m		singlet		IGHV3-15	IGHJ3	﻿GAGGTGCAGCTGGTGGAGTCTGGGGGAAGCTTGGTAAAGCCTGGGGGGTCCCTAAGACTCTCCTGTGTAGCCTCTGGACTCACTTTCAATCACGCCTGGATGAGCTGGGTCCGCCAGGCTCCAGGGAAGGGGCTGGAGTGGGTTGGCCGTATTAAAAGTAAAATTGATGGTGGGACAACAGACTACGCTGCACCCGTGAAAGGCAGATTCACCATCTCAAGAGATGATTCAAAAAGCACGCAGTATCTGCAAATGAACAGCCTGAAAACCGAGGACACAGCCGTATATTACTGTACCACAGATTGCTTTTGGCGCCTCGGGGGCACCACCTGCTACGAGCACGATGCTTTTGATGTCTGGGGCCAAGGGACAATGGTCACCGTCTCTT	﻿EVQLVESGGSLVKPGGSLRLSCVASGLTFNHAWMSWVRQAPGKGLEWVGRIKSKIDGGTTDYAAPVKGRFTISRDDSKSTQYLQMNSLKTEDTAVYYCTTDCFWRLGGTTCYEHDAFDVWGQGTMVTVS		IGKV1-39	IGKJ4	﻿GACATCCAGATGACCCAGTCTCCATCCTCCCTGTCTGCATCTGTAGGAGACAGAGTCACCATCACTTGCCGGGCAAGTCAGGCCATTGCCACCTTTTTAAATTGGTATCAGCAGAAACCAGGGAAAGCCCCTAAGCTCCTGATCTATGCTGCGTCCAGTTTACAAAGTGGGGTCCCATCAAGGTTCAGTGGCAGTGGATCAGGGACAGATTTCACTCTCACCATCAGCAGTCTGCAACCTGAAGATTTTGCGACTTACTACTGTCAACAGAGTTACAATTCCCTTCACTTCGGCGGAGGGACCAAGGTGGAGATCAAAC	﻿DIQMTQSPSSLSASVGDRVTITCRASQAIATFLNWYQQKPGKAPKLLIYAASSLQSGVPSRFSGSGSGTDFTLTISSLQPEDFATYYCQQSYNSLHFGGGTKVEIK		2.89		8.70961	118.926
			C1033		12m		singlet		IGHV1-69	IGHJ6	﻿CAGGTGCAGCTGGTGCAGTCTGGGGCTGAGGTGAAGAAGCCTGGGTCCTCGGTGAAGGTCTCCTGCAAGGCTTCTGGAGGCACCTTCAGCAGGAATGTCATCAGCTGGGTGCGACAGGCCCCTGGACAAGGGCTTGAGTGGATGGGAGGGATCATCCCTATGTTTGGTACAGCAAACTATGCACAGAAGTTTCAGGGCAGAGTCACGATAAGCGCGGACGAATCCACGAGCACAGCCTACATGGAGCTGAGCAGCCTGAGATCTGAGGACACGGCCGTGTATTACTGTGCGAGAGAAGATTTCATACTAGAATCAGCTCCTATACGAGAAAATTCCTACTACTACTACGGTATGGACGTCTGGGGCCAAGGGACCACGGTCACCGTCTCCTCA	﻿QVQLVQSGAEVKKPGSSVKVSCKASGGTFSRNVISWVRQAPGQGLEWMGGIIPMFGTANYAQKFQGRVTISADESTSTAYMELSSLRSEDTAVYYCAREDFILESAPIRENSYYYYGMDVWGQGTTVTVSS		IGKV3-20	IGKJ1	﻿GAAATTGTGTTGACGCAGTCTCCAGGCACCCTGTCTTTGTCTCCAGGGGAAAGAGCCACCCTCTCCTGCAGGGCCAGTCAGAGTGTTAGCAGCAACTACTTAGCCTGGTACCAGCAGAAGCCTGGCCAGGCTCCCAGGCTCCTCATCTATGATGCATCTAGCAGGGCCACTGGCATCCCAGACAGGTTCAGTGGCAGTGGGTCTGGGACAGACTTCACTCTCACCATCAGGAGACTGGAGCCTGAAGATTTTGCAGTGTATTACTGTCAGCAGTATGGTGGCTCACCTCGCACGTTCGGCCAAGGGACCAAGGTGGAAATCAAAC	﻿EIVLTQSPGTLSLSPGERATLSCRASQSVSSNYLAWYQQKPGQAPRLLIYDASSRATGIPDRFSGSGSGTDFTLTIRRLEPEDFAVYYCQQYGGSPRTFGQGTKVEIK		3.63		>1000	>1000
			C1034		12m		singlet		IGHV4-39	IGHJ3	﻿CAGCTGCAGCTGCAGGAGTCGGGCCCAGGACTGGTGAAGCCTTCGGAGACCCTGTCCCTCACCTGCACTGTCTCTGGTGGCTCCGTCAGCAGTAATAATCACTACTGGGGCTGGATCCGCCAGCCCCCAGGGAAGGGGCTGGAGTGGATTGGGAGTATCTCTTCTAGTGGGAGCACCCACCACAACCCGTCCCTCAGGAGTCGAGTCACCATATCCGTAGACACGTCGAAGAACCACTTCTCCCTGAAGCTGAACTCTGTGACCGCCACTGACACGGCTGTGTATTACTGTGCGAGAGTGGATAGCAGTGGCTGGTACACGGGGGATGTTTTTGATGTCTGGGGCCAAGGGACAATGGTCACCGTCTCTTCAG	﻿QLQLQESGPGLVKPSETLSLTCTVSGGSVSSNNHYWGWIRQPPGKGLEWIGSISSSGSTHHNPSLRSRVTISVDTSKNHFSLKLNSVTATDTAVYYCARVDSSGWYTGDVFDVWGQGTMVTVSS		IGKV1-39	IGKJ2	﻿GACATCCAGATGACCCAGTCTCCATCCTCCCTGTCTGCATCTGTAGGAGACAGAGTCACCATCACTTGCCGGGCAAGTCAGACCATTAACAACTATTTAAATTGGTATCAACAGAAACCAGGGAAACCCCCTAAGCTCCTGATCTATGCTGCATTCAGTTTGCACAGTGGGGTCCCATCAAGGTTCAGTGGCAGTAGATCTGGGACAGATTTCACTCTCACCATCAGTAGTCTGCAACCTGAAGATTTTGCAACTTACTACTGTCAACACAGTTACAGTACGATGTGCAGTTTTGGCCAGGGGACCAAGCTGGAGATCAAAC	﻿DIQMTQSPSSLSASVGDRVTITCRASQTINNYLNWYQQKPGKPPKLLIYAAFSLHSGVPSRFSGSRSGTDFTLTISSLQPEDFATYYCQHSYSTMCSFGQGTKLEIK		2.77		65.0786	>1000
			C1035		1.3m		singlet		IGHV3-53	IGHJ6	﻿GAGGTGCAGCTGGTGGAGTCTGGAGGAGGCTTGATCCAGCCTGGGGGGTCCCTGAGACTCTCCTGTGCAGCCTCTGGGCTCACCGTCAGTAGGAACTACATGAACTGGGTCCGCCAGGCCCCAGGGAAGGGGCTGGAGTGGGTCTCAGTTATGTATAGCGGTGGTAGCACATTCTACGCAGACTCCGTGAAGGGCCGATTCACCATCTCCAGAGACAATTCCAAGAACACGCTATATCTTCAAATGAACAGCCTGAGAGCCGAGGACACGGCCGTGTATTACTGTGCGAGAGAAAGCTACGGTATGGACGTCTGGGGCCAAGGGACCACGGTCACCGTCTCCTCA	﻿EVQLVESGGGLIQPGGSLRLSCAASGLTVSRNYMNWVRQAPGKGLEWVSVMYSGGSTFYADSVKGRFTISRDNSKNTLYLQMNSLRAEDTAVYYCARESYGMDVWGQGTTVTVSS		IGKV3-20	IGKJ1	﻿GAAATTGTGTTGACGCAGTCTCCAGGCACCCTGTCTTTGTCTCCAGGGGAAAGAGCCACCCTCTCCTGCAGGGCCAGTCAGAGTTTTAGCAGCACCTACTTAGCCTGGTACCAGCAGAAGCCTGGCCAGGCTCCCAGGCTCCTCATCTATGGTGCATCCAGCAGGGCCACTGGCATCCCAGACAGGTTCAGTGGCAGTGGGTCTGGGACAGACTTCACTCTCACCATCAGCAGACTGGAGCCTGAAGATTTTGCAGTGTATTACTGTCAGCAGTATGTTACCTCACCGTGGACGTTCGGCCAAGGGACCAAGGTGGAAATCAAAC	﻿EIVLTQSPGTLSLSPGERATLSCRASQSFSSTYLAWYQQKPGQAPRLLIYGASSRATGIPDRFSGSGSGTDFTLTISRLEPEDFAVYYCQQYVTSPWTFGQGTKVEIK		2.05		16.2604	153.455
			C1036		12m		clone		IGHV3-53	IGHJ6	﻿GAGGTGCAGCTGGTGGAGTCTGGAGGAGGCTTGATCCAGCCTGGGGGGTCCCTGAGACTCTCCTGTGCAGCCTCTGGGCTCATCGTCAGTAGGAACTACATGAACTGGGTCCGCCAGGTTCCCGGGAAGGGGCTGGAGTGGGTCTCAGTTATGTATGCCGGTGGAAGCACATTCTACGCAGACTCCGTGAAGGGCCGATTCACCATCTCCAGAGACGATTCCAAGAACACGCTGTATCTTCAAATGAACAGCCTGAGACCCGAGGACACGGCCGTGTATTACTGTGCGAGAGAAAGTTACGGTATGGACGTCTGGGGCCAAGGGACCACGGTCACCGTCTCCTCA	﻿EVQLVESGGGLIQPGGSLRLSCAASGLIVSRNYMNWVRQVPGKGLEWVSVMYAGGSTFYADSVKGRFTISRDDSKNTLYLQMNSLRPEDTAVYYCARESYGMDVWGQGTTVTVSS		IGKV3-20	IGKJ1	﻿GAAATTGTGTTGACGCAGTCTCCAGGCACCCTGTCTTTGTCTCCAGGGGAAAGAGCCACCCTCTCCTGCAGGGCCAGTCAGAGTATTAGCAGCACCTACTTAGCCTGGTACCAGCAGAAACCTGGCCAGGCTCCCAGGCTCCTCATCTATGGTGCATCCAGCAGGGCCACTGGCATCCCAGACAGGTTCAGTGGCAGTGGGTCTGGGACAGACTTCACTCTCACCATCAGCAGACTGGAGCCTGAAGATTTTGCAGTGTATTACTGTCAGCAGTATGTTACCTCACCGTGGACGTTCGGCCAAGGGACCAAGGTGGAAATCAAAC	﻿EIVLTQSPGTLSLSPGERATLSCRASQSISSTYLAWYQQKPGQAPRLLIYGASSRATGIPDRFSGSGSGTDFTLTISRLEPEDFAVYYCQQYVTSPWTFGQGTKVEIK		1.02		21.2821	86.3393
			C1038		1.3m		singlet		IGHV1-46	IGHJ4	﻿CAGGTGCAGCTGGTGCAGTCTGGGGCTGAGGTGAAGAAGCCTGGGGCCTCAGTGAAGGTTTCCTGCAAGGCATCTGGATACACCTTCACCAGCTACTATATGCACTGGGTGCGACAGGCCCCTGGACAAGGGCTTGAGTGGATGGGAATAATCAACCCTAGTGGTGGTAGCACAAGGTACGCACAGAAGTTCCAGGGCAGAGTCACCATGACCAGGGACACGTCCACGAGCACAGTCTACATGGAGCTGAGCAGCCTGAGATCTGAGGACACGGCCGTGTATTACTGTGCGAGAGAAGGAGTGGGAGGTACTTCCTACTTTGACTACTGGGGCCAGGGAACCCTGGTCACCGTCTCCTCAG	﻿QVQLVQSGAEVKKPGASVKVSCKASGYTFTSYYMHWVRQAPGQGLEWMGIINPSGGSTRYAQKFQGRVTMTRDTSTSTVYMELSSLRSEDTAVYYCAREGVGGTSYFDYWGQGTLVTVSS		IGLV3-21	IGLJ1	﻿TCCTATGAGCTGACTCAGCCACCCTCGGTGTCAGTGGCCCCAGGAAAGACGGCCAGGATTACCTGTGGGGGAAACAACATTGGAAGTAAAAGTGTGCACTGGTACCAGCAGAAGCCAGGCCAGGCCCCTGTGCTGGTCGTCTATGATGATAGCGACCGGCCCTCAGGGATCCCTGAGCGATTCTCTGGCTCCAACTCTGGGAACACGGCCACCCTGACCATCAGCAGGGTCGAAGCCGGGGATGAGGCCGACTATTACTGTCAGGTGTGGGATAGTAGTAGTGATCCTTATGTCTTCGGAACTGGGACCAAGGTCACCGTCCTAG	﻿SYELTQPPSVSVAPGKTARITCGGNNIGSKSVHWYQQKPGQAPVLVVYDDSDRPSGIPERFSGSNSGNTATLTISRVEAGDEADYYCQVWDSSSDPYVFGTGTKVTVL		2.46		76.7072	>1000
			C1039		12m		singlet		IGHV1-46	IGHJ4	﻿CAGGTGCAGCTGGTGCAGTCTGGGGCTGAGGTGAAGAAGCCTGGGGCCTCAGTGAAGGTTTCCTGCAAGGCATCTGGATATACCTTCACCAGCCACTATATGCACTGGGTGCGACAGGCCCCTGGACAAGGGCTTGAGTGGATGGGAATAATCAACCCTAGGACAAGATACGCACAGATGTTCCAGGGCAGAGTCAGCATGAACAGGGACACGTCCACGAGCACAGTCTACATGGAGCTGAGCAGCCTGACATCTGAGGACACGGCCGTCTATTACTGTGCGAGAGAAGGACTGGGAGCTACTGCCTACTTTGACTACTGGGGCCAGGGAACCCTGGTCACCGTCTCCTCAG	﻿QVQLVQSGAEVKKPGASVKVSCKASGYTFTSHYMHWVRQAPGQGLEWMGIINPRTRYAQMFQGRVSMNRDTSTSTVYMELSSLTSEDTAVYYCAREGLGATAYFDYWGQGTLVTVSS		IGLV3-21	IGLJ1	﻿TCCTATGAGCTGACTCAGCCACCCTCGGTGTCAGTGGCCCCAGGAAAGACGGCCGGGATTACCTGTGGGGGAAGCGACATTGGAAGTAAAAGTGTGCACTGGTACCAGCAGAAGCCAGGCCAGGCCCCTGTGCTGGTCGTCTATGATGATAGCGACCGGCCCTCAGGGATCCCTGAGCGATTCTCTGGCTCCAACTCTGGGAACACGGCCACCCTGACCATCAGCAGGGTCGAAGCCGGGGATGAGGCCGACTATTACTGTCAGGTGTGGGATAGTAGTAGTGATCCTTATGTCTTCGGAACTGGGACCAAGGTCTCCGTCCTAG	﻿SYELTQPPSVSVAPGKTAGITCGGSDIGSKSVHWYQQKPGQAPVLVVYDDSDRPSGIPERFSGSNSGNTATLTISRVEAGDEADYYCQVWDSSSDPYVFGTGTKVSVL		2.61		198.047	>1000
			C1040		12m		clone		IGHV3-33	IGHJ4	﻿CAGGTGCAGCTGGTGGAGTCTGGGGGAGGCGTGGTCCAGCCTGGGAGGTCCCTGAGACTCTCCTGTGCAGCGTCTGGATTCAGCTTCATTAACTATAACATGCACTGGGTCCGCCAGGCTCCAGGCAAGGGGCTGGAGTGGGTGGCAGTTATATGGTATGATGGAAGCAATAAATACTATGCAGACTCCGTGAAGGGCCGATTCACCATCTCCAGAGACAATTCCAAGAACACGCTGTATCTGCAAATGAACAGCCTGAGAGTCGAGGATACGGCTGTTTATTACTGTGCGAGAGACCCGGCTATAACAGAGGCAGAGATTGACTACTGGGGCCAGGGGACCCTGGTCACCGTCTCCTCAG	﻿QVQLVESGGGVVQPGRSLRLSCAASGFSFINYNMHWVRQAPGKGLEWVAVIWYDGSNKYYADSVKGRFTISRDNSKNTLYLQMNSLRVEDTAVYYCARDPAITEAEIDYWGQGTLVTVSS		IGKV2-30	IGKJ1	﻿GATGTTGTGATGACTCAGTCTCCACTCTCCCTGCCCGTCACCCTTGGACAGGCGGCCTCCATCTCCTGCAGGTCTAGTCAAAGCCTCGTACACAGTGATGGAAACACCTACTTGAATTGGTTTCAGCAGAGGCCAGGCCAATCTCCAAGGCGCCTAATTTATAGGGTTTCTAACCGGGACTCTGGGGTCCCAGACAGATTCAGCGCCAGTGGGTCAGGCACTGATTTCACACTGAAAATCAGCAGGGTGGAGGCTGAAGATGTTGGGGTTTATTACTGCATGCAAGGTACACACTGGCCCTGGACGTTCGGCCAAGGGACCAAGGTGGAAATCAAAC	﻿DVVMTQSPLSLPVTLGQAASISCRSSQSLVHSDGNTYLNWFQQRPGQSPRRLIYRVSNRDSGVPDRFSASGSGTDFTLKISRVEAEDVGVYYCMQGTHWPWTFGQGTKVEIK		2.08		53.9191	>1000
			C1041		6.2m		singlet		IGHV1-46	IGHJ6	﻿CAGGTGCAGCTGGTGCAGTCTGGGGCTGAGGTGAAGAAGCCTGGGGCCTCAGTGAAGGTTTCCTGCAAGGCGTCTGGATACACCTTCAGCGACCACTATATTTACTGGGTGCGACAGGCCCCTGGACAAGGGCTTGAGTGGATGGGAATAATCAACCCTAGCGCTGGTAGCACAAGCTACGCACAGAAGTTCCAGGGCAGAGTCACCATGACCAGGGACACGTCCACGAGCACAGTTTACATGGAGCTGAGCAGCCTGAGATCTGAGGACACGGCCGTCTATTACTGCGCTAGAGATATTGTATTCGTACCAGCTACTATGGCTATGGACGTCTGGGGCCTAGGGACCACGGTCACCGTCTCCTCA	﻿QVQLVQSGAEVKKPGASVKVSCKASGYTFSDHYIYWVRQAPGQGLEWMGIINPSAGSTSYAQKFQGRVTMTRDTSTSTVYMELSSLRSEDTAVYYCARDIVFVPATMAMDVWGLGTTVTVSS		IGKV3-11	IGKJ3	﻿GAAATTGTGTTGACACAGTCTCCAGCCACCCTGTCTTTGTCTCCAGGGGAAAGAGCCACCCTCTCCTGCAGGGCCAGTCAGAGTGTTAGCAGGTACTTAGCCTGGTACCAACAGAAACCTGGCCAGGCTCCCAGGCTCCTCATCTATGATGCATCCAACAGGGCCACTGGCATCCCAGCCAGGTTCAGTGGCAGTGGGTCTGGGACAGACTTCACTCTCACCATCAGCAGCCTAGAGCCTGAAGATTTTGCAGTTTATTACTGTCAACAGCGTAGCAACTGGCTATTCACTTTCGGCCCTGGGACCAAAGTGGATATCAAAC	﻿EIVLTQSPATLSLSPGERATLSCRASQSVSRYLAWYQQKPGQAPRLLIYDASNRATGIPARFSGSGSGTDFTLTISSLEPEDFAVYYCQQRSNWLFTFGPGTKVDIK		3.65		>1000	>1000
			C1042		12m		singlet		IGHV1-46	IGHJ6	﻿CAGGTGCAGCTGGTGCAGTCTGGGGCTGAGGTGAAGAAGCCTGGGGCCTCAGTGAAGGTTTCCTGCAAGGCGTCTGGATACACCTTCAGCGACCACTATATTTACTGGGTGCGACAGGCCCCTGGACAAGGGCTTGAGTGGATGGGAATAATCAACCCTAGTGGTGGTAGCACAAGCTACGCACAGAAGTTCCAGGGCAGAGTCACCATGACCAGGGACACGTCCACGAGCACAGTCTACATGGAGCTGAGCAGCCTGAAATCTGAGGACACGGCCGTCTATTACTGTTCTAGAGATATTGTATTCGTACCAGCTACTATGGCTATGGACGTCTGGGGCCAAGGGACCACGGTCACCGTCTCCTCA	﻿QVQLVQSGAEVKKPGASVKVSCKASGYTFSDHYIYWVRQAPGQGLEWMGIINPSGGSTSYAQKFQGRVTMTRDTSTSTVYMELSSLKSEDTAVYYCSRDIVFVPATMAMDVWGQGTTVTVSS		IGKV3-11	IGKJ3	﻿GAAATTGTGTTGACACAGTCTCCAGCCACCCTGTCTTTGTCTCCAGGGGAAAGAGCCACCCTCTCCTGCAGGGCCAGTCAGAGTGTTAGCAGGTACTTAGCCTGGTACCAACAGAAACCTGGCCAGGCTCCCAGGCTCCTCATCTATGATGCATCCAACAGGGCCACTGGCATCCCAGCCAGGTTCAGTGGCAGTGGGTCTGGGACAGACTTCACTCTCACCATCAGCAGCCTAGAGCCTGAAGATTTTGCAGTTTATTACTGTCAGCAGCGTAGCAACTGGCTATTCACTTTCGGCCCTGGGACCAAAGTGGATATCAAAC	﻿EIVLTQSPATLSLSPGERATLSCRASQSVSRYLAWYQQKPGQAPRLLIYDASNRATGIPARFSGSGSGTDFTLTISSLEPEDFAVYYCQQRSNWLFTFGPGTKVDIK		4.55		>1000	>1000
			C1043		12m		clone		IGHV3-9	IGHJ6	﻿GAAGTGCAGCTGGTGGAGTCTGGGGGAGGCTTGGTACAGCCTGGCAGGTCCCTGAGACTCTCCTGTGCAGCCTCTGGATTCATCTTTGATAATTATGCCATGCACTGGGTCCGGCAAGCTCCAGGGAAGGGCCTGGAGTGGGTCTCAGGTATCAGTTGGAATAGTGATAGCATAGGCTATGCGGACTCTGTGAAGGGCCGATTCACCATCTCCAGAGACAACGCCAAGAACTCCCTCTATCTGCAAATGAGCAGTCTGAGAGCTGAGGACACGGCCTTGTATTACTGTGCAAAAGATCTCCTAGGGAACTACTACTACTACACTTTGGACGTCTGGGGCCAAGGGACCACGGTCACCGTCTCCTCA	﻿EVQLVESGGGLVQPGRSLRLSCAASGFIFDNYAMHWVRQAPGKGLEWVSGISWNSDSIGYADSVKGRFTISRDNAKNSLYLQMSSLRAEDTALYYCAKDLLGNYYYYTLDVWGQGTTVTVSS		IGLV2-14	IGLJ3	﻿CAGTCTGCCCTGACTCAGCCTGCCTCCGTGTCTGGGTCTCCTGGACAGTCGATCACCATCTCCTGCACTGGAACCAGTAGTGACATTGGTGGTAATAATTATGTCTCCTGGTATCAACAACACCCAGGCAAAGCCCCCAGACTCATGATTTTTGATGTCAGTTATCGGCCCTCAGGGGTTTCTAATCGCTTCTCTGGCTCCAAGTCTGGCAACACGGCCTCCCTGACCATCTCTGGGCTCCAGGCTGAGGACGAGGCTGATTATTATTGCATCTCATATACAACCAGCAGCACTCTCGGGGTCTTCGGCGGAGGGACCAAGCTGACCGTCCTA	﻿QSALTQPASVSGSPGQSITISCTGTSSDIGGNNYVSWYQQHPGKAPRLMIFDVSYRPSGVSNRFSGSKSGNTASLTISGLQAEDEADYYCISYTTSSTLGVFGGGTKLTVL		2.77		30.326	163.481
			C1044		1.3m		singlet		IGHV4-61	IGHJ2	﻿CAGGTGCAGCTGCAGGAGTCGGGCCCAGGATTGGTGAAGCCTTCACAGACCCTGTCCCTCACCTGCACTGTCTCTGGTGGCTCCATCAGTAGTGGTAATTACTACTTGACCTGGATCCGGCAGCCCGCCGGGAAGGGACTGGAGTGGATTGGGCATATCTATACCAGTGGGAGCACCAACTACAACCCCTCCCTCAAGAGTCGAGTCACCATATCAGTAGACACGTCCATGAACCAGTTCTCCCTGAAGCTGAGCTCTGTGACCGCCGCAGACACGGCCGTGTATTACTGTGCGAGAGACATCCCGCCAACCTGGTACTTCGATCTCTGGGGCCGTGGCACCCTGGTCACCGTCTCCTCAG	﻿QVQLQESGPGLVKPSQTLSLTCTVSGGSISSGNYYLTWIRQPAGKGLEWIGHIYTSGSTNYNPSLKSRVTISVDTSMNQFSLKLSSVTAADTAVYYCARDIPPTWYFDLWGRGTLVTVSS		IGLV3-21	IGLJ3	﻿TCCTATGAGCTGACACAGCCACCCTCGGTGTCAGTGGCCCCAGGAAAGACGGCCAGGATTACCTGTGGGGGAAACAACATTGGAAGTAAAAATGTGCACTGGTACCAGCAGAAGCCAGGCCAGGCCCCTGTGCTGGTCGTCTATGATGATAGCGACCGGCCCTCAGGGATCCCTGAGCGATTCTCTGGCTCCAACTCTGGGAACACGGCCACCCTGACCATCAGCAGGGTCGAAGCCGGGGATGAGGCCGGCTATTACTGTCAGGTGTGGGATAGTACTAGTGATCATCTTTTTTGGGTGTTCGGCGGAGGGACCAAGCTGACCGTCCTAG	﻿SYELTQPPSVSVAPGKTARITCGGNNIGSKNVHWYQQKPGQAPVLVVYDDSDRPSGIPERFSGSNSGNTATLTISRVEAGDEAGYYCQVWDSTSDHLFWVFGGGTKLTVL		3.22		782.77	>1000
			C1045		12m		singlet		IGHV4-61	IGHJ2	﻿CAGGTGCAGCTGCAGGAGTCGGGCCCAGGATTGGTGAAGCCTTCACAGACCCTGTCCCTCACCTGCACTGTCTCTGGTGACTCCATCAGCAGTGGTAATTACTACTGGAGCTGGATCCGGCAGCCCGCCGGGAAGGGACTGGAGTGGATTGGGCATATCTATACCAGTGGGAGCCCCAACTACAAGCCCTCCCTCAAGAGTCGAGTCACCATATCACTAGACACGTCCAAGAATCAGTTCTCCCTGAAGCTGACCTCTGTGACCGCCGCAGACACGGCCATGTATTACTGTGCGAGAGACATCCCGTCAACCTGGTACTTCGATCTCTGGGGCCGTGGCACCCTGGTCACCGTCTCCTCAG	﻿QVQLQESGPGLVKPSQTLSLTCTVSGDSISSGNYYWSWIRQPAGKGLEWIGHIYTSGSPNYKPSLKSRVTISLDTSKNQFSLKLTSVTAADTAMYYCARDIPSTWYFDLWGRGTLVTVSS		IGLV3-21	IGLJ3	﻿TCCTATGAGCTGACTCAGCCACCCTCGGTGTCAGTGGCCCCAGGAAAGACGGCCAGGATTCCCTGTGGGGGAACCGACATTGGAAGTAAAAATGTGCACTGGTACCAGCAGAAGCCAGGCCAGGCCCCTGTGCTGGCCGTCTATGATGATAGCGACCGGCCCTCAGGGATCCCTGAGCGATTCTCTGGCTCCAACTCTGGGAGCACGGCCACCCTGACCATCAGCAGGGTCGAAGCCGGGGATGAGGCCGACTATTACTGTCAGGTGTGGGATAGTAGTGGTGATCGTCTCTCTTGGGTGTTCGGCGGAGGGACCAAGCTGACCGTCCTAG	﻿SYELTQPPSVSVAPGKTARIPCGGTDIGSKNVHWYQQKPGQAPVLAVYDDSDRPSGIPERFSGSNSGSTATLTISRVEAGDEADYYCQVWDSSGDRLSWVFGGGTKLTVL		2.57		>1000	>1000
			C1046		1.3m		singlet		IGHV5-51	IGHJ4	﻿GAGGTGCAGCTGGTGCAGTCTGGAGCAGAGGTGAAAAAGCCCGGGGAGTCTCTGAAGATCTCCTGTAAGGGTTCTGGATACAGCTTTACCAGCTACTGGATCGGCTGGGTGCGCCAGATGCCCGGGAAAGGCCTGGAGTGGATGGGGATCATCTATCCTGGTGACTCTGATACCAGATACAGCCCGTCCTTCCAAGGCCAGGTCACCATCTCAGCCGACAAGTCCATCAGCACCGCCTACCTGCAGTGGAGCAGCCTGAAGGCCTCGGACACCGCCATGTATTACTGTGCGAGAATGGTGACGTCCGGGACGTATTACTATGATAATAGTGGTTATTCTTCGTCGGGCCCTTTTGACTACTGGGGCCAGGGAACCCTGGTCACCGTCTCCTCAG	﻿EVQLVQSGAEVKKPGESLKISCKGSGYSFTSYWIGWVRQMPGKGLEWMGIIYPGDSDTRYSPSFQGQVTISADKSISTAYLQWSSLKASDTAMYYCARMVTSGTYYYDNSGYSSSGPFDYWGQGTLVTVSS		IGKV1D-13	IGKJ3	﻿GACATCCAGTTGACCCAGTCTCCATCCTCCCTGTCTGCATCTGTAGGAGACAGAGTCACCATCACTTGCCGGGCAAGTCAGGGCATTAGCAGTGCTTTAGCCTGGTATCAGCAGAAACCAGGGAAAGCTCCTAAGCTCCTGATTTATGATGCCTCCAGTTTGGAAAGTGGGGTCCCATCAAGGTTCAGCGGCAGTGGATCTGGGACAGATTTCACTCTCACCATCAGCAGCCTGCAGCCTGAAGATTTTGCAACTTATTACTGTCAACAGTTTAATAATTTCGGCCCTGGGACCAAAGTGGATATCAAAC	﻿DIQLTQSPSSLSASVGDRVTITCRASQGISSALAWYQQKPGKAPKLLIYDASSLESGVPSRFSGSGSGTDFTLTISSLQPEDFATYYCQQFNNFGPGTKVDIK		3.8		>1000	>1000
			C1047		12m		singlet		IGHV5-51	IGHJ4	﻿GAGGTGCAGCTGGTGCAGTCTGGAGCAGAGGTGAAAAAGCCCGGGGAGTCTCTGAAGATCTCCTGTAAGGGTTCTGGCTACAGCTTCATCAGTTACTGGATTGTCTGGGTGCGCCAGATGCCCGGCAAAGGCCTGGAGTGGATTGGGATCATCTATCCTGGTGACTCTGACACCATATACAGCCCGTCCTTCCAAGGCCAGGTCACCCTCTCAGCCGACAAGTCCATCAGCACCGCCTACCTGCAGTGGAGCAGCCTGAAGGCCTCGGACACCGCCATCTATTACTGTGCGAAAATGGTGACGTCCGGGACCTCTTACTATGAAACTAGAGGTTATGCTTCGTCGGGCCCCTTTGACAACTGGGGCCAGGGAACCCTGGTCACCGTCTCCTCAG	﻿EVQLVQSGAEVKKPGESLKISCKGSGYSFISYWIVWVRQMPGKGLEWIGIIYPGDSDTIYSPSFQGQVTLSADKSISTAYLQWSSLKASDTAIYYCAKMVTSGTSYYETRGYASSGPFDNWGQGTLVTVSS		IGKV1D-13	IGKJ3	﻿GACATCCAGTTGACCCAGTCTCCATCCTCCCTGTCTGCATCTGTAGGAGACAGAGTCACCATCACTTGCCGGGCAAGTCAGGGCATTAGCAGTGCTTTAGCCTGGTATCAACAGAAACCAGGGAAAGCTCCTAAACTCCTGATCTATGATGCCTCCAGTTTGGAAAGTGGGGTCCCATCAAGGTTCAGCGGCAGTGGATCTGGGACAGATTTCACTCTCACCATCAGCAGCCTGCAGCCTGAAGATTTTGCAACTTATTACTGTCAACAGTCTGATAATTTCGGCCCTGGGACCAAAGTGGATATCAA	﻿DIQLTQSPSSLSASVGDRVTITCRASQGISSALAWYQQKPGKAPKLLIYDASSLESGVPSRFSGSGSGTDFTLTISSLQPEDFATYYCQQSDNFGPGTKVDI		2.46		112.003	>1000
			C1048		6.2m		singlet		IGHV5-51	IGHJ4	﻿GAGGTGCAGCTGGTGCAGTCTGGAGCAGAGGTGAAAAAGCCCGGGGAGTCTCTGAAGATCTCCTGTAAGGTTTCTGGATACAGCTTTATCAGCCACTGGATCGGCTGGGTGCGCCAGATGCCCGGGAAAGGCCTGGAGTGGATGGGGATCATCTATCCTGGTGACTCTGATACCAGATACAGCCCGTCCTTCCAAGGCCAGGTCACCATCTCAGCCGACAAGTCCATCAGCACCGCCTACCTGCAGTGGAGCAGCCTGAAGGCCTCGGACACCGCCATGTATTACTGTGCGAGACGTGGGGCAAGTTGGGAGCTGGACTACTGGGGCCAGGGAACCCTGGTCACCGTCTC	﻿EVQLVQSGAEVKKPGESLKISCKVSGYSFISHWIGWVRQMPGKGLEWMGIIYPGDSDTRYSPSFQGQVTISADKSISTAYLQWSSLKASDTAMYYCARRGASWELDYWGQGTLVTV		IGLV1-44	IGLJ1	﻿CAGTCTGTGCTGACTCAGCCACCCTCAGCGTCTGGGACCCCCGGGCAGAGGGTCACCATCTCTTGTTCTGGAAGCAGCTCCAACATCGGGAGTAATCCTGTAAGCTGGTACCAGCAGCTCCCAGGACCGGCCCCCCAACTCCTCATCTATGGTAATGATCAGCGGCCCTCAGGGGTCCCTGACCGATTCTCTGGCTCCAAGTCTGGCACCTCAGCCTCCCTGGCCATCAGTGGGCTCCAGTCTGAGGATGAGGCTGATTATTACTGTGCAGCATGGGATGACAGCCTGAATGGTTATGTCTTCGGAACTGGGACCAAGGTCACCGTCCTA	﻿QSVLTQPPSASGTPGQRVTISCSGSSSNIGSNPVSWYQQLPGPAPQLLIYGNDQRPSGVPDRFSGSKSGTSASLAISGLQSEDEADYYCAAWDDSLNGYVFGTGTKVTVL		2.41		90.5385	>1000
			C1049		12m		singlet		IGHV5-51	IGHJ4	﻿GAGGTGCAGCTGGTGCAGTCTGGAGCAGAGGTGAAAAAGCCCGGGGAGTCTCTGAAGATCTCCTGTAAGAGCTCTGGATACAGTTTTATCAGCCACTGGATCGGCTGGGTGCGCCAGATGCCCGGGAAAGGCCTGGAGTGGATGGGGATCATCTGGCCTGGTGACTCTGATACCAGATACAGTCCGTCCTTCCAAGGCCAGGTCACCATCTCAGTCGACAAGTCCATCACCACCGTCTACCTGCAGTGGAGCAGCCTGAAGGCCGCGGACACCGCCATGTATTACTGTGCGAGACGTGGGTCAAGTTGGGAGGTGGACTACTGGGGCCAGGGAACCCTGGTCACCGTCTCCTCAG	﻿EVQLVQSGAEVKKPGESLKISCKSSGYSFISHWIGWVRQMPGKGLEWMGIIWPGDSDTRYSPSFQGQVTISVDKSITTVYLQWSSLKAADTAMYYCARRGSSWEVDYWGQGTLVTVSS		IGLV1-44	IGLJ1	﻿CAGTCTGTGCTGACTCAGCCACCCTCAGCGTCTGGGACCCCCGGGCAGAGGGTCACCATCTCTTGTTCTGGAAGCAGCTCCAACATCGGCAGTAATACTGTAAACTGGTACCTGCAGCTCCCAGGAACGGCCCCCAAACTCCTCATCTATGGTAATGATCAGCGGCCCTCAGGGGTCCCTGACCGATTCTCTGGCTCCAAGTCTGGCACCTCAGCCTCCCTGGCCATCAGTGGGCTCCAGTCTGAGGATGAGGCTGACTATTACTGTGCAGCATGGGATGACAGGCTGAATGGTTATGTCTTCGGAACTGGGACCACGGTCACCGTCCTAG	﻿QSVLTQPPSASGTPGQRVTISCSGSSSNIGSNTVNWYLQLPGTAPKLLIYGNDQRPSGVPDRFSGSKSGTSASLAISGLQSEDEADYYCAAWDDRLNGYVFGTGTTVTVL		2.81		157.425	>1000
			C1050		6.2m		singlet		IGHV3-9	IGHJ3	﻿GAAGTGCAGCTGGTGGAGTCTGGGGGAGGCTTGGTACAGCCTGGCAGGTCCCTGAGACTCTCCTGTGCAGCCTCTGGATTCACCTTTGATGATTATGGCATGCACTGGGTCCGGCAAGCTCCAGGGAAGGGCCTGGAGTGGGTCTCAGGTATTAGTTGGAATGGTGATAGCATAGGCTATGCGGACTCTGTGAAGGGCCGATTCACCATCTCCAGAGACAACGCCAAGACCTCCCTGTATCTGCAAATGAACCGTCTGAGAGCTGAGGACACGGCCCTGTATTACTGTGCAAAAGCTGCGAGTAGAAGTACCAGAATAGGGGGTGCATTTGATATCTGGGGCCAAGGGACAATGGTCACCGTCTCTTCAG	﻿EVQLVESGGGLVQPGRSLRLSCAASGFTFDDYGMHWVRQAPGKGLEWVSGISWNGDSIGYADSVKGRFTISRDNAKTSLYLQMNRLRAEDTALYYCAKAASRSTRIGGAFDIWGQGTMVTVSS		IGLV2-23	IGLJ1	﻿CAGTCTGCCCTGACTCAGCCTGCCTCCGTGTCTGGGTCTCCTGGACAGTCGATCACCATCTCCTGCACTGGAACCAGCAGTGATGTTGGGGGTTATAACCTTGTCTCCTGGTACCAACAGCACCCAGGCAAAGCCCCCAAACTCATGATTTATGAGGGCAGTAAGCGGCCCTCAGGGGTTTCTAATCGCTTCTCTGGCTCCAAGTCTGGCAACACGGCCTCCCTGACAATCTCTGGGCTCCAGGCTGAGGACGAGGCTGATTATTACTGCTGCTCATATGCATATAGTTTCACAAATGTCTTCGGCACTGGGACCAAGGTCACCGTCCT	﻿QSALTQPASVSGSPGQSITISCTGTSSDVGGYNLVSWYQQHPGKAPKLMIYEGSKRPSGVSNRFSGSKSGNTASLTISGLQAEDEADYYCCSYAYSFTNVFGTGTKVTV		2.78		>1000	>1000
			C1051		12m		singlet		IGHV3-9	IGHJ3	﻿GAAGTGCAGCTGGTGGAGTCTGGGGGAGGCTTGGTACAGCCTGGCAGGTCCCTGAGACTCTCCTGTGTAGCCTCTGGATTCACCTTTGATGATTATGGCTTACACTGGGTCCGGCAAGCTCCAGGGAAGGGCCTGGAGTGGGTCTCAGGCATTAGTTGGAATAGTGATAGTATAGGCTATGCGGACTCTGTGAAGGGCCGATTCGCCATCTCCAGAGACAACGCCAGGACCTCCCTGTATCTGCAAATGAACCGTCTGAGAGCTGAGGACACGGCCTTGTATTACTGTGCAAAAGCTGCGAGTAGAAGTACCAGAATAGGGGGTGCGTTTGATATCTGGGGCCAAGGGACAATGGTCACCGTCTCTTCAG	﻿EVQLVESGGGLVQPGRSLRLSCVASGFTFDDYGLHWVRQAPGKGLEWVSGISWNSDSIGYADSVKGRFAISRDNARTSLYLQMNRLRAEDTALYYCAKAASRSTRIGGAFDIWGQGTMVTVSS		IGLV2-23	IGLJ1	﻿CAGTCTGCCCTGACTCAGCCTGCCTCCGTGTCTGGGTCTCCTGGACAGTCGATCACCATCTCCTGCACTGGAACCAGCAGTGATGTTGGGGGTTATAACCTTGTCTCCTGGTACCAACAGTACCCAGGCAAAGCCCCCAAACTCATGATTTATGAGGACAGTAAGCGGCCCTCAGGGGTTTCTCATCGCTTCTCTGGCTCCAAGTCTGGCAACACGGCCTCCCTGACAATCTCGGGGCTCCAGGCTGAGGACGAGGCTGATTATTACTGCTGCTCATATGCATTTAGTTTCACAAATGTCTTCGGCACTGGGACCAAGGTCACCGTCC	﻿QSALTQPASVSGSPGQSITISCTGTSSDVGGYNLVSWYQQYPGKAPKLMIYEDSKRPSGVSHRFSGSKSGNTASLTISGLQAEDEADYYCCSYAFSFTNVFGTGTKVTV		1.4		>1000	>1000
			C1052		12m		clone		IGHV1-24	IGHJ4	﻿CAGGTCCAGCTGGTACAGTCTGGGGCTGAGGTGAAGAAGCCTGGGGCCTCAGTGAAGGTCTCCTGCAAGGTTTCCGGATACACCCTCAGTGAATTATCCATGCACTGGGTGCGACAGGCTCCTGGAGAAGGGCTTGAGTGGTTGGGAGGTTTTGATCCTGAAGATGGTGAAACAATCAACGCACAGAAGTTCCAGGGCAGAGTCACCATGACCGAGGACAGATCTACAGACACAGCCTACATGGAGCTGAGCAGCCTGAGATCTGAGGACACGGCCGTGTATTACTGTGCAACGCGGGGTCGATATTGTAGTAGTGGTAACTGCTACTATCACCACTGGGGCCAGGGAACCCTGGTCACCGTCTCCTCAG	﻿QVQLVQSGAEVKKPGASVKVSCKVSGYTLSELSMHWVRQAPGEGLEWLGGFDPEDGETINAQKFQGRVTMTEDRSTDTAYMELSSLRSEDTAVYYCATRGRYCSSGNCYYHHWGQGTLVTVSS		IGKV1-5	IGKJ1	﻿GACATCCAGATGACCCAGTCTCCTTCCACCCTGTCTGCATCTGTAGGAGACAGAGTCATTATCACTTGCCGGGCCAGTCAGAATATTCATAACTGGTTGGCCTGGTATCAGCAGAAACCAGGGAAAGCCCCTAAGCTCCTGATCTATAAGGCGTCTAGTTTAGAAAGTGGGGTCCCATCAAGGTTCAGCGGCAGTGGATCTGGGACAGAATTCACTCTCACCATCAGCAGCCTGCAGCCTGATGATTTTGCAACTTATTTCTGCCAACAGTATCATAGTTATTCTTGGACGTTCGGCCAAGGGACCAAGGTGGAAATCAAAC	﻿DIQMTQSPSTLSASVGDRVIITCRASQNIHNWLAWYQQKPGKAPKLLIYKASSLESGVPSRFSGSGSGTEFTLTISSLQPDDFATYFCQQYHSYSWTFGQGTKVEIK		2.64		6.92265	44.9143
			C1053		6.2m		singlet		IGHV3-23	IGHJ4	﻿GAGGTGCAGCTGTTGGAGTCTGGGGGAGGCTTGGTACAGCCTGGGGGGTCCCTGAGACTCTCCTGTGCAGCCTCTGGATTCACCTTTAGCAGCTATGCCATGAACTGGGTCCGCCAGGCTCCAGGGAAGGGGCTGGAGTGGGTCTCAGCTATTAGTGGTAGTGGTGGTGGCACATACTACGCAGACTCCGTGAAGGGCCGGTTCACCATCTCCAGAGACAATTCCAAGAACACGCTGTATCTGCAAATGGACAGCCTGAGAGCCGAGGACACGGCCGTATATTACTGTGCGAAAGATGTTCCGATTGAGCAGCAGCTGGTACCGACCTTTGACTACTGGGGCCAGGGAGCCCTGGTCACCGTCTCCTCAG	﻿EVQLLESGGGLVQPGGSLRLSCAASGFTFSSYAMNWVRQAPGKGLEWVSAISGSGGGTYYADSVKGRFTISRDNSKNTLYLQMDSLRAEDTAVYYCAKDVPIEQQLVPTFDYWGQGALVTVSS		IGKV1-39	IGKJ5	﻿GACATCCAGATGACCCAGTCTCCATCCTCCCTGTCTGCATCTGTAGGAGACAGAGTCACCATCACTTGCCGGGCAAGTCAGAGCATTAGCAGGTATTTAAATTGGTATCAGCAGAAACCAGGGAAAGCCCCTAAGCTCCTGATCTATGGTGCATCCAGTTTGCAAAGTGGGGTCCCATCAAGGTTCAGTGGCAGTGGATCTGGGACAGATTTCACTCTCACCATCAGCAGTCTGCAACCTGAAGATTTTGCAACTTACTGGTGTCAACAGAGTTACAGCACCCTTTCGATCACCTTCGGCCAAGGGACACGACTGGAGATTAAAC	﻿DIQMTQSPSSLSASVGDRVTITCRASQSISRYLNWYQQKPGKAPKLLIYGASSLQSGVPSRFSGSGSGTDFTLTISSLQPEDFATYWCQQSYSTLSITFGQGTRLEIK		4.13		>1000	>1000
			C1054		12m		singlet		IGHV3-23	IGHJ4	﻿GAGGTGCAGCTGTTGGAGTCTGGGGGAGGCTTGGTACAGCCTGGGGGGTCCCTGAGACTCTCCTGTGTAGTCTCTGGATTCACCTTTAGCAGCTATGCCATGAACTGGGTCCGCCAGGCTCCAGGGAAGGGGCTGGAGTGGGTCTCAGTTATCGGTGGTAGTGGTGATGGGAGATACTACGCAGACTCCGTGAAGGGCCGGTTCACCATCTCCAGAGACAATTCCAAGAACACGTTGTATCTGCAAATGAACAGCCTCAGAGGCGACGACACGGCCGTATATTACTGTGCGAGAGATGTCCCCGTTGAGCAGCAGCTGGTACCGACCTTTGACTACTGGGGCCAGGGAACCCTGGTCACCGTCTCCTCAG	﻿EVQLLESGGGLVQPGGSLRLSCVVSGFTFSSYAMNWVRQAPGKGLEWVSVIGGSGDGRYYADSVKGRFTISRDNSKNTLYLQMNSLRGDDTAVYYCARDVPVEQQLVPTFDYWGQGTLVTVSS		IGKV1-39	IGKJ5	﻿GACATCCAGATGACCCAGTCTCCATCCTCCCTGTCTGCGTCTGTAGGAGACAGAGTCACCATCACTTGCCGGGCAAGTCAGAGCATTAGCAGGTATTTAAATTGGTATCAGCAGAAACCAGGGAAAGCCCCTAAGCTCCTGATCTATGCTGCATCCAGTTTGCAAAGTGGGGTCCCATCAAGGTTCAGTGGCAGTGGATCTGGGACAGAATTCACTCTCACCATCAGCAGTCTGCAACCTGAGGATTTTGCAACTTACTACTGTCAACAGAGTTACAGCACCCTTTCGATCACCTTCGGCCAAGGGACACGACTGGAGATTAAAC	﻿DIQMTQSPSSLSASVGDRVTITCRASQSISRYLNWYQQKPGKAPKLLIYAASSLQSGVPSRFSGSGSGTEFTLTISSLQPEDFATYYCQQSYSTLSITFGQGTRLEIK		1.64		>1000	>1000
			C1055		6.2m		singlet		IGHV3-30	IGHJ3	﻿CAGGTGCAGCTGGTGGAGTCTGGGGGAGGCGTGGTCCAGCCTGGGAGGTCCCTGAGACTCTCCTGTGCAGCCTCTGGATTCACCTTCAGTACCTATGGCATGAACTGGGTCCGCCAGGCTCCAGGCAAGGGGCTGGAGTGGGTGGCACTTATATTATATGATGGAAGTGATAAATACTATGCAGACTCCGTGAAGAGCCGATTCACCATCTCCAGAGACAATTCCAGGAACACGCTGTATCTGCAAATGACTAGCCTGAGAGCTGAGGACACGGCTGTGTATTACTGTGCGAAAGCTTTATCATCCACGTATTACTATGATGCTAGTGGTCCCGATGCTTTTGATATCTGGGGCCAAGGGACAATGGTCACCGTCTCTTCAG	﻿QVQLVESGGGVVQPGRSLRLSCAASGFTFSTYGMNWVRQAPGKGLEWVALILYDGSDKYYADSVKSRFTISRDNSRNTLYLQMTSLRAEDTAVYYCAKALSSTYYYDASGPDAFDIWGQGTMVTVSS		IGKV1-5	IGKJ2	﻿GACATCCAGATGACCCAGTCTCCTTCCACCCTGTCTGCATCTGTAGGAGACAGAGTCACCATCACTTGCCGGGCCAGTCAGAGTATTAGTAGCTGGTTGGCCTGGTATCAGCAGAAACCAGGGAAAGCCCCTAAGCTCCTGATCTATAAGGCGTCTAGTATAGAAAGTGGGGTCCCACCAAGGTTCAGCGGCAGTGGATCTGGGACAGAGTTCACTCTCACCATCAGCAGCCTGCAGCCTGATGATTTTGCAACTTATTACTGCCAACAGTATAATAGTTATTCGTACACTTTTGGCCAGGGGACCAAGCTGGAGATCAAAC	﻿DIQMTQSPSTLSASVGDRVTITCRASQSISSWLAWYQQKPGKAPKLLIYKASSIESGVPPRFSGSGSGTEFTLTISSLQPDDFATYYCQQYNSYSYTFGQGTKLEIK		2.71		>1000	>1000
			C1056		12m		singlet		IGHV3-30	IGHJ3	﻿CAGGTGCAGCTGGTGGAGTCTGGGGGAGGCGTGGTCCAGCCTGGGAGGTCCCTGAGACTCTCCTGTGCAGCCTCTGGATTCACCTTCAGTACCTATGGCATGAACTGGGTCCGCCAGGCTCCAGGCAAGGGGCTGGAGTGGGTGGCACTTATATTATTTGATGGAAGTGATAAATACTATGCGGACTCCGTGAAGAGCCGATTCACCATCTCCAGAGACAATTCCAGGAACACACTGTATCTGCAAATGACCAGCCTGAGAGCTGAGGACACGGCTGTGTATTACTGTGCGAAAGCTTTATCATCCACGTTTTACTTTGATGCTAGTGGTCCCGATGCCTTTGATATCTGGGGCCAAGGGACAATGGTCACCGTCTCTTCAG	﻿QVQLVESGGGVVQPGRSLRLSCAASGFTFSTYGMNWVRQAPGKGLEWVALILFDGSDKYYADSVKSRFTISRDNSRNTLYLQMTSLRAEDTAVYYCAKALSSTFYFDASGPDAFDIWGQGTMVTVSS		IGKV1-5	IGKJ2	﻿GACATCCAGATGACCCAGTCTCCTTCCACCCTGTCTGCATCTGTGGGAGACAGAGTCACCATCACTTGCCGGGCCAGTCAGAGTATTAGTACCTGGTTGGCCTGGTATCAGCAGAAACCAGGGAAAGCCCCTCAACTCCTGATCTACAAGGCGTCTAGTATAGAAAGTGGGGTCCCACCAAGGTTCAGCGGCAGTGGATCTGGGACAGAGTTCACTCTCACCATCAGCAGCCTGCAGCCTGATGATTTTGCAACTTATTACTGCCAACAGTATAATAGTTATTCGTACACTTTTGGCCAGGGGACCAAGCTGGAGATCAAAC	﻿DIQMTQSPSTLSASVGDRVTITCRASQSISTWLAWYQQKPGKAPQLLIYKASSIESGVPPRFSGSGSGTEFTLTISSLQPDDFATYYCQQYNSYSYTFGQGTKLEIK		1.76		304.346	>1000
			C1057		12m		clone		IGHV1-69	IGHJ4	﻿CAGGTGCAGCTGGTGCAGTCTGGGGCTGAGGTGAAGAAGCCTGGGTCCTCGGTGAAGGTCTCCTGCAAGGCTTCTGGAGGCACCTTCACTACCTATATTATAAGCTGGGTGCGACAGGCCCCTGGACAAGGGCTTGAGTGGATGGGAGGGATCAGCCCTATGCTTGGTACAGCAAACTACGCACAGAAGTTCCAGGGCGGAGTCACGATTACCGCGGACGAATCCACGACCACAGCCTACATGGAGATGAGCGGCCTGAGATCTGAGGACACGGCCGTGTATTATTGTGCGAGAGCCCATATGTATTGCAGTGATGGTAGCTGCTACAGACAGAGTGGCTACTTTGACTCCTGGGGCCAGGGAACCCTGGTCACCGTCTCCTCAG	﻿QVQLVQSGAEVKKPGSSVKVSCKASGGTFTTYIISWVRQAPGQGLEWMGGISPMLGTANYAQKFQGGVTITADESTTTAYMEMSGLRSEDTAVYYCARAHMYCSDGSCYRQSGYFDSWGQGTLVTVSS		IGLV2-11	IGLJ2	﻿CAGTCTGCCCTGACTCAGCCTCGCTCAGTGTCCGGGTCTCCTGGACAGTCAGTCACCATCACCTGCACTGGAACCAGCAGTAATGTAGGTGGTTATAAGTATGTGTCCTGGTTCCAACAACACCCAGGCAAAGCCCCCAAATTTCTGATTTATGATGTCAGTGAGCGGTCCTCAGGGGTCCCTGATCGCTTCTCTGGCTCTAAGTCTGGCAACACGGCCTCCCTGACCATCTCTGGGCTCCAGGCTGAGGATGAGGCTGATTATTACTGCTGCTCATATGCAGGCAAGTACACCGTAGTCTTCGGCGGAGGGACCAGACTGACCGTC	﻿QSALTQPRSVSGSPGQSVTITCTGTSSNVGGYKYVSWFQQHPGKAPKFLIYDVSERSSGVPDRFSGSKSGNTASLTISGLQAEDEADYYCCSYAGKYTVVFGGGTRLTV		2.12		>1000	>1000
			C1058		6.2m		singlet		IGHV3-66	IGHJ3	﻿GAGGTGCAGCTGGTGGAGTCTGGGGGAGGCTTGGTCCAGCCTGGGGGGTCCCTGAGACTCTCCTGTGCAGCCTCTGGAATCATCGTCAGTAGTAACTACATGAATTGGGTCCGCCAGGTTCCAGGGAAGGGGCTGGAGTGGGTCTCAGTTCTTTATAGCGGTGGTAGCACATTCTACGCAGACTCCGTGAGGGGCCGATTCACCATCTCCAGAGACAATTCCAAGAACACGCTGTTTCTTCAAATGAACAGCCTGAGACCTGAGGACACGGCTGTGTATTACTGTGCGAGAGATTTCCGAGAAGGTGCTTTTGATATCTGGGGCCAAGGGACAATGGTCACCGTCTC	﻿EVQLVESGGGLVQPGGSLRLSCAASGIIVSSNYMNWVRQVPGKGLEWVSVLYSGGSTFYADSVRGRFTISRDNSKNTLFLQMNSLRPEDTAVYYCARDFREGAFDIWGQGTMVTV		IGKV1-9	IGKJ5	﻿GACATCCAGTTGACCCAGTCTCCATCCTTCCTGTCTGCATCTGTAGGAGACAGAGTCACCATCACTTGCCGGGCCAGTCAGGGCATTAGCAGTTATTTAGCCTGGTATCAGCAAAAACCAGGGAAAGCCCCTAACCTCCTGATCTATGCTGCATCCACTTTGCAAAGTGGGGTCCCATCAAGGTTCAGCGGCAGTGGATCTGGGACAGATTTCACTCTCACAATCAGCAGCCTGCAGCCTGAAGATTTTGCAACTTATTACTGTCAACAGCTTAATAGTTATTCCCCCCTTTTCGGCCAAGGGACACGACTGGAGATTAAAC	﻿DIQLTQSPSFLSASVGDRVTITCRASQGISSYLAWYQQKPGKAPNLLIYAASTLQSGVPSRFSGSGSGTDFTLTISSLQPEDFATYYCQQLNSYSPLFGQGTRLEIK		2.13		17.1173	64.9522
			C1059		12m		singlet		IGHV3-66	IGHJ3	﻿GAGGTGCAGCTGGTGGAGTCGGGGGGAGGCTTGGTCCAGCCGGGGGGGTCCCTAAGACTCTCCTGTGCAGCCTCTGGAGTCACCGTCAGTTACAACTACATGCACTGGGTCCGCCAGGCTCCAGGGAAGGGGCTGGAGTGGGTCTCAGTTTTTTTTCCCGGTGGTAGTATATTCTACGCAGACTCCGTGAAGGGCCGATTCAGCATCTCCAGAGACAATTCTCACAACACGCTTTATCTTCAAATGAACAACTTGAGACCTGAGGACACGGCTGTCTATTACTGTGCGAGAGATTTTCGAGAAGGGGCTATTGATCTCTGGGGCCAAGGGACAATGGTCACCGTCTCTTCAG	﻿EVQLVESGGGLVQPGGSLRLSCAASGVTVSYNYMHWVRQAPGKGLEWVSVFFPGGSIFYADSVKGRFSISRDNSHNTLYLQMNNLRPEDTAVYYCARDFREGAIDLWGQGTMVTVSS		IGKV1-9	IGKJ5	﻿GACATCCAGTTGACCCAGTCTCCATCCTTCCTGTCTGCATCTGTAGAAGACAGAGTCACCATCACTTGCCGGGCCAGTCAGGGCATTAGCAGTTATTTAGCCTGGTATCAGCAAAAACCAGGGAAAGCCCCTAAGCTCCTGATCTATGGTGCATCCACTTTGCAAAGTGGGGTCCCATCAAGGTTCAGCGGCAGTGGATCTGGGACGGAGTTCACTCTCACAATCAGCAGCCTGCAGCCTGAAGATTCTGCAACTTATTACTGTCAACAGCTTAATAGTTACCCCCCCCTTTTCGGCCAAGGGACACGACTGGAGATTAAAC	﻿DIQLTQSPSFLSASVEDRVTITCRASQGISSYLAWYQQKPGKAPKLLIYGASTLQSGVPSRFSGSGSGTEFTLTISSLQPEDSATYYCQQLNSYPPLFGQGTRLEIK		1.69		24.1528	56.7141
			C1060		12m		clone		IGHV3-66	IGHJ4	﻿GAGGTGCAGCTGGTGGAGTCTGGGGGAGACTTGGTCCAGCCGGGGGGGTCCCTGAGACTCTCCTGTGCAGCCTCTGAAATCATCGTCAGTAGAAATTACATGAACTGGGTCCGCCAGGCTCCAGGGAAGGGGCTGGAGTGGGTCTCAATTATTTATAGCGGCGGGAGTACGTTCTACGGAGACTCCGTGAAGGGCCGATTCACCATCTCCAGAGACAGTTCCAAGAACACGCTGTATCTTCAAATGCATGGCCTGAGAGTTGAGGACACGGCTATATATTACTGTGCGAGGTCGTACGGTGACTACTATATTGACTACTGGGGCCAGGGAACCCTGGTCACCGTCTCCTCAG	﻿EVQLVESGGDLVQPGGSLRLSCAASEIIVSRNYMNWVRQAPGKGLEWVSIIYSGGSTFYGDSVKGRFTISRDSSKNTLYLQMHGLRVEDTAIYYCARSYGDYYIDYWGQGTLVTVSS		IGKV1-12	IGKJ3	﻿GACATCCAGATGACCCAGTCTCCATCTTCCGTGTCTGCATCTGTAGGAGACAGAGTCACCATCACTTGTCGGACAAGTCAGAGTATTAGCACCTCGTTAGCCTGGTATCAGCAGAAACCAGGGAAAGCTCCTAAGCTCCTGATCTATGCTGCATCCAGTTTGCAGCGTGGGGTCCCATCTAGGTTCAGCGGCACTGGATCTGGGACAGATTTCACTCTCACCATCAGCAGCCTGCAGCCTGAAGATTTTGCAACTTACTACTGTCAACAGTCTAGCAGTTCCCCTCCCCTATTCACTTTCGGCCCTGGGACCAAAGTGGATATCAAAC	﻿DIQMTQSPSSVSASVGDRVTITCRTSQSISTSLAWYQQKPGKAPKLLIYAASSLQRGVPSRFSGTGSGTDFTLTISSLQPEDFATYYCQQSSSSPPLFTFGPGTKVDIK		2.67		14.6969	91.3337
			C1061		6.2m		singlet		IGHV3-13	IGHJ4	﻿GAGGTGCAGCTGGTGGAGTCTGGGGGAGGCTTGGTACAGCCTGGGGGGTCCCTGAGACTCTCCTGTGCAGCCTCTGGATTCACCTTCAGTAGGTACGACATGCACTGGGTCCGCCAAGGTACAGGAAAAGGTCTGGAGTGGGTCTCAGCTATTGGTACTTCTGGTGACACATACTATCCAGACTCCGTGAAGGGCCGATTCACCATCTCCAGAGAAAATGCCAAGAACTCCTTGTATCTTCAAATGAACAGCCTGAGAGCCGGGGACACGGCTGTGTATTACTGTGCAAGAGGGGGTCTCCAAACTACGACTTGGCTTTTTGACTACTGGGGCCAGGGAACCCTGGTCACCGTCTCCTCAG	﻿EVQLVESGGGLVQPGGSLRLSCAASGFTFSRYDMHWVRQGTGKGLEWVSAIGTSGDTYYPDSVKGRFTISRENAKNSLYLQMNSLRAGDTAVYYCARGGLQTTTWLFDYWGQGTLVTVSS		IGKV1-39	IGKJ5	﻿GACATCCAGATGACCCAGTCTCCATCCTCCCTGTCTGCATCTGTAGGAGACAGAGTCACCATCACTTGCCGGGCAAGTCAGAGCATTAGCAGGTATTTAAACTGGTATCAGCAGAAACCAGGGAAAGCCCCTAAGCTCCTGATCTATGCTGCATCCAGTTTGCAAAGTGGGGTCCCATCAAGGTTCAGTGGCAGCGGAGCTGGGACAGATTTCACTCTCACCATCAGCAGTCTGCAACCTGAAGATTTTGCAATTTACTACTGTCAACAGAGTTACAGTAACCCTCCGATCACCTTCGGCCAAGGGACACGACTGGAGATTAAAC	﻿DIQMTQSPSSLSASVGDRVTITCRASQSISRYLNWYQQKPGKAPKLLIYAASSLQSGVPSRFSGSGAGTDFTLTISSLQPEDFAIYYCQQSYSNPPITFGQGTRLEIK		2.26		>1000	>1000
			C1062		12m		singlet		IGHV3-13	IGHJ4	﻿GAGGTGCAGCTGGTGGAGTCTGGGGGAGGCTTGGTACAGCCTGGGGGGTCCCTGAGACTCTCCTGTGCAGCCTCTGGATTCACCTTCAGTAACTACGACATGCACTGGGTCCGCCAAACTACAGGAAAAGGTCTGGAGTGGGTCTCAGCTATTGGTACTGCTGGTGACACATACTATCCAGGCTCCGTGAAGGGCCGATTCACCATGTCCAGAGAAAATGCCAAGAACTCCTTGTATCTTCAAATGAACAGCCTGAGAGCCGGGGACACGGCTGTGTATTACTGTGCAAGAGGGGGTCTCCAAACTACGACTTGGCTTTTTGACAACTGGGGCCAGGGAACCCTGGTCACCGTCTCCTCAG	﻿EVQLVESGGGLVQPGGSLRLSCAASGFTFSNYDMHWVRQTTGKGLEWVSAIGTAGDTYYPGSVKGRFTMSRENAKNSLYLQMNSLRAGDTAVYYCARGGLQTTTWLFDNWGQGTLVTVSS		IGKV1-39	IGKJ5	﻿GACATCCAGATGACCCAGTCTCCATCCTCCCTGTCTGCATCTGTAGGAGACAGAGTCACCATCACTTGCCGGGCAAGTCAGACCATTAGCAGGTATTTAAATTGGTATCAACAGAAACCAGGGAAAGCCCCTAAGCTCCTGATCTATGCTGCATCCAGTCTCCAAAGTGGGGTCCCATCAAGGTTCAGTGGCAGTGGATCTGGGACAGATTTCACTCTCACCATCAGCAGTCTGCAACCTGAAGATTTTGCAACTTACTACTGTCAACAGAGTTACACTATGCCTCCGATCACCTTCGGCCAAGGGACACGACTGGAGATTAAAC	﻿DIQMTQSPSSLSASVGDRVTITCRASQTISRYLNWYQQKPGKAPKLLIYAASSLQSGVPSRFSGSGSGTDFTLTISSLQPEDFATYYCQQSYTMPPITFGQGTRLEIK		2.61		>1000	>1000
			C1063		12m		singlet		IGHV5-51	IGHJ4	﻿GAGGTGCAGCTGGTGCAGTCTGGAGCAGAGGTGAAAAAGCCCGGGGAGTCTCTGAAGATCTCCTGTAAGGGCTATGGAAACAGCTTTAACAACTACTGGATCGCCTGGGTGCGCCAGATGCCCGTGAAAGGCCTGGAGTGGATGGGGGTCATCAATCCTGGTGACTCTGATACCAGATACAGCCCGTCCTTCCAAGGCCAGGTCACCATATCAGTCGACAAGTCCATCAGTACCGCCTACCTGCAGTGGAGCAGCCTGAAGGCCTCGGACACCGCCATGTATTACTGTGCGAGAACATGGTCACCAGCTGCTGTGGCGTTCTTTGACTCTTGGGGCCAGGGAACCCTGGTCACCGTCTCCT	﻿EVQLVQSGAEVKKPGESLKISCKGYGNSFNNYWIAWVRQMPVKGLEWMGVINPGDSDTRYSPSFQGQVTISVDKSISTAYLQWSSLKASDTAMYYCARTWSPAAVAFFDSWGQGTLVTVS		IGLV6-57	IGLJ2	﻿AATTTTATGCTGACTCAGCCCCACTCTGTGTCGGAGTCTCCGGGGAAGACGGTAACCATCTCCTGCACCCGCAGCAGTGACAGCATTGGCAGCAACTATGTACAGTGGTACCAGCAACGCCCGGGCAGTTCCCCCACCATTGTGATCTATGAGGATAGCCAAAGACCCTCTGGGGTCCCTCATCGGTTCTCTGGCTCCTTCGACAGCTCCTCCAACTCTGCCTCCCTCACCATCTCTGGACTGAAGACTGAGGACGAGGCTGACTACTACTGTCAGTCTTGGGATAGCGGCAATCTGGTATTCGGCGGAGGGACCAAGCTGACCGTCCTAG	﻿NFMLTQPHSVSESPGKTVTISCTRSSDSIGSNYVQWYQQRPGSSPTIVIYEDSQRPSGVPHRFSGSFDSSSNSASLTISGLKTEDEADYYCQSWDSGNLVFGGGTKLTVL		3.04		104.465	790.045
			C1065		12m		singlet		IGHV3-53	IGHJ4	﻿GAGGTGCAGCTGGTGGAGTCTGGAGGAGGCTTGATCCAGCCTGGGGGGTCCCTGAGACTCTCCTGTGCAGCCTCTGGATTCACCGTCAGTCGCAACTACATGAGCTGGGTCCGCCAGGCTCCAGGGAAGGGGCTGGAGTGGGTCTCAGTTATTTATAGCGGTGGTAGCACATTCTACGCAGACTCCGTGAAGGGCCGATTCACCATCTCCAGAGACAATTCCAAGAACACGCTGTATCTTCAAATGAACAGCCTGAGAGCCGAGGACACGGCCGTGTATTACTGTGCGAGAGGCCTCCCGACTGGGGAAGGTTGGAACTACTTTGACTACTGGGGCCAGGGAACCCTGGTCACCGTCTCCTCAG	﻿EVQLVESGGGLIQPGGSLRLSCAASGFTVSRNYMSWVRQAPGKGLEWVSVIYSGGSTFYADSVKGRFTISRDNSKNTLYLQMNSLRAEDTAVYYCARGLPTGEGWNYFDYWGQGTLVTVSS		IGLV2-14	IGLJ2	﻿CAGTCTGCCCTGACTCAGCCTGCCTCCGTGTCTGGGTCTCCTGGACAGTCGATCACCATCTCCTGCACTGGAACCAGCAGTGACATTGGTGGTTATCACTATGTCTCCTGGTACCAACAGCACCCAGGCAAAGCCCCCAAACTCATGATTTATGATGTCAGTAATCGGCCCTCAGGGATTTCTAATCGCTTCTCTGGCTCCAAGTCTGGCAACACGGCCTCCCTGACCATCTCTGGGCTCCAGGCTGAGGACGAGGCTGATTATTACTGCAGCTCATATGCAAGCAGCAGCGTGATATTCGGCGGAGGGACCAAGCTGACCGTCCTAG	﻿QSALTQPASVSGSPGQSITISCTGTSSDIGGYHYVSWYQQHPGKAPKLMIYDVSNRPSGISNRFSGSKSGNTASLTISGLQAEDEADYYCSSYASSSVIFGGGTKLTVL		3.52		8.28499	173.339
			C1066		12m		singlet		IGHV3-9	IGHJ4	﻿GAAGTGCAGCTGGTGGAGTCTGGGGGGGGCTTGGTACAGCCTGGCAGGTCCCTGAGACTCTCCTGTGCAGCCTCTGGATTCATGTTTGATGATTATGCCATGCACTGGGTCCGGCAAGCTCCAGGGAAGGGCCTGGAGTGGGTCTCAGGTATTAATTGGAGTAGTGCTGACATTGGCTATGTGGACTCTGTGAAGGGCCGATTCACCATCTCCAGAGACAACGCCAAGAACTCCCTGTATCTGCAAATGAACAGTCTGAGAACTGAGGACACGGCCTTCTATTACTGTGCAAAAGGGTGGTTCGGAGAATTATTGGGCGGAAGTGACTCCTGGGGCCAGGGAACCCTGGTCACCGTCTCCTCAG	﻿EVQLVESGGGLVQPGRSLRLSCAASGFMFDDYAMHWVRQAPGKGLEWVSGINWSSADIGYVDSVKGRFTISRDNAKNSLYLQMNSLRTEDTAFYYCAKGWFGELLGGSDSWGQGTLVTVSS		IGLV4-60	IGLJ2	﻿CAGCTTGTGCTGACTCAATCATCCTCTGCCTCTGCTTCCCTGGGATCCTCGGTCAAGCTCACCTGCACTCTGAACAGTGGGCACAGTAGCTACATCATCGCATGGCATCAGCAGCAGCCAGGGAAGGCCCCTCGGTACTTGATGAAGCTTGAAGGTAGTGGAAGCTACAACAAGGGGAGCGGAGTTCCTGATCGCTTCTCAGGCTCCAGCTCTGGGGCTGACCGCTACCTCACCATCTCCAACCTCCAGTTTGAGGATGAGGCTGATTATTACTGTGCGACCTGGGACAGTAACACTCAGGTATTCGGCGGAGGGACCAAGCTGACCGTCCTAG	﻿QLVLTQSSSASASLGSSVKLTCTLNSGHSSYIIAWHQQQPGKAPRYLMKLEGSGSYNKGSGVPDRFSGSSSGADRYLTISNLQFEDEADYYCATWDSNTQVFGGGTKLTVL		3.01		34.8528	642.259
			C1067		12m		singlet		IGHV1-46	IGHJ5	﻿CAGGTGCAGCTGGTGCAGTCTGGGGCTGAGGTGAAGAAGCCTGGGGCCTCAGTGAAGGTTTCCTGCAAGGCATCTAGAGACACCTTCACCACCCACTATATACACTGGGTGCGACAGGCCCCTGGACAAGGGCTTGAGTGGATGGGAATAATCAACCCTAGTGGTGGTAGCATAAGCTACGCACAGAAGTTCCAGGGCAGAGTCACCATGACCAGGGACACGTCCACGAGCACAGTCTACATGGAGCTGAGCAGCCTGCGATCTGAGGACACGGCCGTCTATTACTGTGCGAGAGGGGGGATAGTACCACATCTGAGTAACTGGTTCGACCCCTGGGGCCAGGGAACCCTGGTCACCGTCTCCTCAG	﻿QVQLVQSGAEVKKPGASVKVSCKASRDTFTTHYIHWVRQAPGQGLEWMGIINPSGGSISYAQKFQGRVTMTRDTSTSTVYMELSSLRSEDTAVYYCARGGIVPHLSNWFDPWGQGTLVTVSS		IGKV3-20	IGKJ3	﻿GAAATTGTGTTGACGCAGTCTCCAGGCACCCTGTCTTTGTCTCCAGGGGAAAGAGCCACCCTCTCCTGTAGGGCCAGTCAGAGTGTTAGCAGCAGCTACTTAGCCTGGTACCAGCAGAAACCTGGCCAGGCTCCCAGGCTCCTCATCTATGGTGCATCCAGCAGGGCCACTGGCATCCCAGACAGGTTCACTGGCAGTGGGTCTGGGACAGACTTCACTCTCACCATCAGCAGACTGGAGCCTGAAGATTTTGCAGTGTATTACTGTCAGCAATATGGTCGCTCCTCGGGATTCACTTTCGGCCCTGGGACCAAAGTGGATATCAAAC	﻿EIVLTQSPGTLSLSPGERATLSCRASQSVSSSYLAWYQQKPGQAPRLLIYGASSRATGIPDRFTGSGSGTDFTLTISRLEPEDFAVYYCQQYGRSSGFTFGPGTKVDIK		2.933		>1000	>1000
			C1068		12m		singlet		IGHV3-30	IGHJ1	﻿CAGGTGCAGCTGGTGGAGTCTGGGGGAGGCGTGGTCCAGCCTGGGAGGTCCCTGAGACTCTCCTGTGCAGCCTCTGGATTCACCTTCAGTACCTTTGCTATGCACTGGGTCCGCCAGGCTCCAGGCAAGGGGCTAGAGTGGGTGGCAGTTACATCATATGATGGAAGTAATAAATACTACGCAGACTCCGTGAAGGGCCGATTCACCATCTCCAGAGACAATTCCAAGAACACGCTGTATCTGCAAATGAACAGCCTGAGAGCTGAGGACACGGCTGTGTATTACTGTGCGAGAGGCCTACTATGGTTCGGGGAGTCTGAATACTTCCAGCACTGGGGCCAGGGCACCCTGGTCACCGTCTCCTCAG	﻿QVQLVESGGGVVQPGRSLRLSCAASGFTFSTFAMHWVRQAPGKGLEWVAVTSYDGSNKYYADSVKGRFTISRDNSKNTLYLQMNSLRAEDTAVYYCARGLLWFGESEYFQHWGQGTLVTVSS		IGKV4-1	IGKJ3	﻿GACATCGTGATGACCCAGTCTCCAGACTCCCTGGCTGTGTCTCTCGGCGAGAGGGCCACCATCAACTGCAAGTCCAGCCAGAGTGTTTTATTCAGCTCCACCAATAAGAACTACTTAGCTTGGTACCAGCAGAAACCAGGACAGCCTCCTAAGCTGCTCATTTACTGGGCAGCTACCCGGGAATCCGGGGTCCCTGACCGATTCAGTGGCAGCGGGTCTGGGACAGACTTCACACTCACCATCAGCAGCCTGCAGGCTGAAGATGTGGCAGTTTATCACTGTCAGCAATACTATAGTACCCCTTTCACTTTCGGCCCTGGGACCAAAGTGGATATCAAAC	﻿DIVMTQSPDSLAVSLGERATINCKSSQSVLFSSTNKNYLAWYQQKPGQPPKLLIYWAATRESGVPDRFSGSGSGTDFTLTISSLQAEDVAVYHCQQYYSTPFTFGPGTKVDIK		2.477		33.8599	252.031
			C1069		6.2m		singlet		IGHV3-30	IGHJ4	﻿CAGGTGCAGCTGGTGGAGTCTGGGGGAGGCGTGGTCCAGCCTGGGAGGTCCCTGAGACTCTCCTGTGCAGCCTCTGGATTCACCTTCAGTAGCTATTCTATCCACTGGGTCCGCCAGGCTCCAGGCAAGGGGCTTGAGTGGGTGGCAGTTATATCAGATGATGCAAGTATGAAATTCTACGCAGACTCCGTGAAGGGCCGATTCACCATCTCCAGAGACAATTCCAAGAACACACTGTTTCTGCAGATGAACAGCCTGAGTCCTGAGGACACGGCTGTATATTACTGTGCGAGAGATGCGCTGACTGCAATATCGGTTCGTTTTGACTACTGGGGCCAGGGAACCCTGGTCACCGTCTCCTCAG	﻿QVQLVESGGGVVQPGRSLRLSCAASGFTFSSYSIHWVRQAPGKGLEWVAVISDDASMKFYADSVKGRFTISRDNSKNTLFLQMNSLSPEDTAVYYCARDALTAISVRFDYWGQGTLVTVSS		IGKV1-39	IGKJ4	﻿GACATCCAGATGACCCAGTCTCCATCCTCCCTGTCTGCTTCTGTAGGAGACAGAGTCACCATCACTTGCCGGGCAAGTCAGAGCATTAGTAGGTATTTAAATTGGTATCAGCAGAAACCAGGGAAAGCCCCTAAGCTCCTGATCTATGATGCATCCAGTTTCCAAAGTGGGGTCCCATCAAGGTTCAGTGGCAGTGGATCTGGGACAGATTTCACTCTCACCATCAGCAGTCTGCAGCCTGAAGATTTTGCAACTTACTACTGTCAACAGAGTTACAGTACCCCTTCGGTCACTTTCGGCGGAGGGACCAAGGTGGAGATCAAAC	﻿DIQMTQSPSSLSASVGDRVTITCRASQSISRYLNWYQQKPGKAPKLLIYDASSFQSGVPSRFSGSGSGTDFTLTISSLQPEDFATYYCQQSYSTPSVTFGGGTKVEIK		n.d.		n.d.	n.d.
